# Supplementary material for: Effects of stoichiometry and temperature perturbations on beech leaf litter decomposition, enzyme activities and protein expression
Source: Copernicus journal article supplement (doi:10.5194/bg-9-4537-2012), 2012-11-16
Supplement: Supplementary file 1 [file Supplementary Table S1.xls]

## Sheet: Identification parameters
Supplementary Table S1. List of proteins belonging to the assigned protein clusters and respective protein identification parameters.
The best protein probability, best protein coverage and highest number of unique peptides used for cluster identification are provided.
#	Leading accession number	Proteins in cluster	Identified Proteins	Representative source organism	Molecular weight	Best protein probability	Best protein coverage	Highest number of unique peptides	Other proteins in cluster
1	UniRef100_Q29V96	2	ATP synthase subunit beta (Fragment)	Fagus grandifolia	53 kDa	1	0.38	19	UniRef100_Q5W4R8
2	UniRef100_Q3U452	1	ATP synthase subunit alpha	Mus musculus	55 kDa	1	0.14	9
3	UniRef100_C5XGT6	2	ATP synthase subunit beta	Sorghum bicolor	58 kDa	1	0.2	8	UniRef100_O24345
4	UniRef100_A5PFH1	14	Ribulose bisphosphate carboxylase large chain (Fragment)	Brenierea insignis	53 kDa	1	0.16	9	UniRef100_B5WX89	UniRef100_B5WX91	UniRef100_B5WX92	UniRef100_B5WX93	UniRef100_O20352	UniRef100_Q29VD0	UniRef100_Q597L1	UniRef100_Q71N56	UniRef100_Q8SN54	UniRef100_Q8SN55	UniRef100_Q9GDK4	UniRef100_Q9GDK5	UniRef100_Q9GGH8
5	UniRef100_B2A947	1	ATP synthase subunit alpha	Podospora anserina	59 kDa	1	0.16	9
6	UniRef100_A1CM60	12	Actin	Aspergillus clavatus	42 kDa	1	0.16	6	UniRef100_A1DLW3	UniRef100_A2R4I7	UniRef100_B2B7I2	UniRef100_O13419	UniRef100_O93786	UniRef100_P20359	UniRef100_Q0CH69	UniRef100_Q2GXZ6	UniRef100_Q9UVW9	UniRef100_UPI00002348D4	UniRef100_UPI000023E266
7	UniRef100_Q0U1E5	1	Putative uncharacterized protein	Phaeosphaeria nodorum	112 kDa	1	0.066	7
8	UniRef100_Q06Z74	1	Fibrillin 4	Coffea canephora	32 kDa	1	0.11	5
9	UniRef100_B7T325	1	ATP synthase subunit alpha	Geranium carolinianum	55 kDa	1	0.16	7
10	UniRef100_O48657	1	Chlorophyll a/b-binding protein	Fagus crenata	28 kDa	1	0.33	7
11	UniRef100_A6R9F3	4	ATP synthase subunit beta	Ajellomyces capsulatus NAm1	56 kDa	1	0.15	6	UniRef100_C0P0C5	UniRef100_C1GLV8	UniRef100_C1HB96
12	UniRef100_B6HAB7	5	Histone H4	Penicillium chrysogenum Wisconsin 54-1255	15 kDa	1	0.43	8	UniRef100_C7YYV3	UniRef100_P23750	UniRef100_Q711M0	UniRef100_UPI00002342D6
13	UniRef100_B2VRU6	1	Elongation factor 1-alpha	Pyrenophora tritici-repentis Pt-1C-BFP	50 kDa	1	0.12	7
14	UniRef100_O98447	4	ClpC protease	Spinacia oleracea	99 kDa	1	0.043	5	UniRef100_P31542	UniRef100_Q9FI56	UniRef100_UPI0001984FF5
15	UniRef100_A9PFI8	1	Predicted protein	Populus trichocarpa	41 kDa	1	0.087	3
16	UniRef100_D1HAI0	2	Whole genome shotgun sequence of line PN40024, scaffold_72.assembly12x (Fragment)	Vitis vinifera	45 kDa	1	0.12	4	UniRef100_UPI000198559F
17	UniRef100_P25856	1	Glyceraldehyde-3-phosphate dehydrogenase A, chloroplastic	Arabidopsis thaliana	42 kDa	1	0.12	5
18	UniRef100_B2AZV9	1	Malate dehydrogenase	Podospora anserina	35 kDa	1	0.13	5
19	UniRef100_A9PGW0	4	Fructose-bisphosphate aldolase	Populus trichocarpa	43 kDa	1	0.1	3	UniRef100_A9PJ44	UniRef100_B9H0X7	UniRef100_Q8LL68
20	UniRef100_P49317	1	Catalase isozyme 3	Nicotiana plumbaginifolia	57 kDa	1	0.071	5
21	UniRef100_A0ZZ15	69	Photosystem Q(B) protein	Gossypium barbadense	39 kDa	1	0.13	4	UniRef100_A2Q5A0	UniRef100_A4GYN9	UniRef100_A4QJI0	UniRef100_A4QK85	UniRef100_A4QL86	UniRef100_A4QLH5	UniRef100_A6MM16	UniRef100_A7Y395	UniRef100_A8SE40	UniRef100_A8W3A5	UniRef100_A9L976	UniRef100_A9QC34	UniRef100_A9QCA8	UniRef100_B2XWS0	UniRef100_B6DZC6	UniRef100_B7FIW8	UniRef100_B7T2R3	UniRef100_B7T2Y4	UniRef100_B7T355	UniRef100_B7T3C5	UniRef100_B7T3R7	UniRef100_B7T3Y8	UniRef100_B7T459	UniRef100_B9SB42	UniRef100_B9SHX2	UniRef100_C3KEE7	UniRef100_C3UNV2	UniRef100_C7A8A1	UniRef100_P02956	UniRef100_P02957	UniRef100_P04998	UniRef100_P04999	UniRef100_P06585	UniRef100_P0C434	UniRef100_P11848	UniRef100_P13910	UniRef100_P27201	UniRef100_P32036	UniRef100_P83755	UniRef100_Q01366	UniRef100_Q06H17
22	UniRef100_B5G500	3	GLP2	Gossypium barbadense	22 kDa	1	0.16	3	UniRef100_Q7Y255	UniRef100_Q9SEL3
23	UniRef100_C6SVE5	1	Proteasome subunit beta type	Glycine max	25 kDa	1	0.15	3
24	UniRef100_B2VRS5	3	40S ribosomal protein S3-2	Pyrenophora tritici-repentis Pt-1C-BFP	29 kDa	1	0.094	2	UniRef100_Q0U9B4	cont2O00774
25	UniRef100_A6QWM4	24	Tubulin beta chain	Ajellomyces capsulatus NAm1	46 kDa	1	0.13	4	UniRef100_A6RI51	UniRef100_A7EH60	UniRef100_B5AK55	UniRef100_C0NKB3	UniRef100_C5P5I9	UniRef100_O13470	UniRef100_O42786	UniRef100_P16040	UniRef100_P40905	UniRef100_P41388	UniRef100_P53373	UniRef100_Q4R9N3	UniRef100_Q534F3	UniRef100_Q534F4	UniRef100_Q5S3J7	UniRef100_Q6V7K1	UniRef100_Q7LLP2	UniRef100_Q7Z7S5	UniRef100_Q7Z7T9	UniRef100_Q7Z7U2	UniRef100_Q7Z7W2	UniRef100_Q86ZP5	UniRef100_Q9P8H6
26	UniRef100_A6RJ45	1	ATP-dependent RNA helicase eIF4A	Botryotinia fuckeliana B05.10	45 kDa	1	0.11	4
27	UniRef100_C7YN88	2	Predicted protein	Nectria haematococca mpVI 77-13-4	22 kDa	1	0.1	3	UniRef100_UPI000023EE2E
28	UniRef100_C7Z1Y0	1	Predicted protein	Nectria haematococca mpVI 77-13-4	80 kDa	1	0.075	4
29	UniRef100_A6SDQ0	14	Histone H2B	Botryotinia fuckeliana B05.10	15 kDa	1	0.18	3	UniRef100_A7DZQ4	UniRef100_A7F043	UniRef100_B2VXN3	UniRef100_C0NZ94	UniRef100_C0SD34	UniRef100_C1HDS5	UniRef100_C5GR58	UniRef100_P37210	UniRef100_Q1E5N0	UniRef100_Q2HH38	UniRef100_Q5G577	UniRef100_Q7Z9J4	UniRef100_Q875B7
30	UniRef100_B9RZ18	1	Putative uncharacterized protein	Ricinus communis	32 kDa	1	0.13	3
31	UniRef100_A0A365	28	Cytochrome b6	eudicotyledons	24 kDa	1	0.21	4	UniRef100_A0ZZ65	UniRef100_A1E9V4	UniRef100_A1E9V4-2	UniRef100_A6MMF2	UniRef100_A6MMN7	UniRef100_A6MMX4	UniRef100_A7Y3H9	UniRef100_A8W3F1	UniRef100_A9QB84	UniRef100_A9QBH6	UniRef100_B1NWI0	UniRef100_B7T3Q7	UniRef100_B7T3X8	UniRef100_C0LEA4	UniRef100_C7BFA1	UniRef100_P05642	UniRef100_P05642-2	UniRef100_Q09ME7	UniRef100_Q09WY7	UniRef100_Q0G9I9	UniRef100_Q0G9T2	UniRef100_Q0ZIY9	UniRef100_Q332U7	UniRef100_Q49KW8	UniRef100_Q4FFV5	UniRef100_Q4FFV6	UniRef100_Q7YJU8
32	UniRef100_A5BYV7	30	Putative uncharacterized protein	Vitis vinifera	73 kDa	1	0.067	3	UniRef100_A9PET4	UniRef100_A9RGW5	UniRef100_A9RHN4	UniRef100_B3SGC7	UniRef100_B6UH55	UniRef100_B9DHY6	UniRef100_B9HK35	UniRef100_B9HV14	UniRef100_B9RHV0	UniRef100_C0PHC0	UniRef100_C5XW73	UniRef100_C5Z7B5	UniRef100_D1HB88	UniRef100_D1HHY9	UniRef100_O23654	UniRef100_P09469	UniRef100_P31405	UniRef100_P49087	UniRef100_Q38758	UniRef100_Q39291	UniRef100_Q42477	UniRef100_Q4TUS1	UniRef100_Q651T8	UniRef100_Q6EUQ9	UniRef100_Q84XV7	UniRef100_Q84XW6	UniRef100_Q9AVU8	UniRef100_Q9SM09	UniRef100_UPI0001621379
33	UniRef100_D0F1P7	2	Aspartic proteinase 1	Castanea mollissima	56 kDa	1	0.084	3	UniRef100_D0F1P8
34	UniRef100_Q0G9X7	1	ATP synthase subunit alpha, chloroplastic	Daucus carota	55 kDa	1	0.087	3
35	UniRef100_B2W2Q2	3	Glyceraldehyde-3-phosphate dehydrogenase	Pyrenophora tritici-repentis Pt-1C-BFP	37 kDa	1	0.11	4	UniRef100_P28844	UniRef100_P29497
36	UniRef100_C7IWD0	1	Os01g0791600 protein	Oryza sativa Japonica Group	42 kDa	1	0.084	3
37	UniRef100_A9PEL1	2	2-cys peroxiredoxin	Populus trichocarpa	30 kDa	1	0.15	4	UniRef100_B9SVY3
38	UniRef100_A9PIG1	1	Putative uncharacterized protein	Populus trichocarpa	29 kDa	1	0.088	2
39	UniRef100_A6RNS7	2	ADP/ATP carrier protein	Botryotinia fuckeliana B05.10	34 kDa	1	0.13	3	UniRef100_A7E677
40	UniRef100_C6TGD9	1	Putative uncharacterized protein	Glycine max	43 kDa	1	0.068	2
41	UniRef100_A5AS18	2	Whole genome shotgun sequence of line PN40024, scaffold_14.assembly12x	Vitis vinifera	22 kDa	1	0.18	3	UniRef100_Q6YCG4
42	UniRef100_Q0UYY5	1	Putative uncharacterized protein	Phaeosphaeria nodorum	74 kDa	1	0.045	3
43	UniRef100_A5B8T3	10	Putative uncharacterized protein	Vitis vinifera	35 kDa	1	0.073	2	UniRef100_P37829	UniRef100_Q2PYY9	UniRef100_Q307X5	UniRef100_Q307Z3	UniRef100_Q42896	UniRef100_Q7XAE2	UniRef100_Q7XAE3	UniRef100_Q7XJ81	UniRef100_Q8H976
44	UniRef100_A1CTD1	11	6-phosphogluconate dehydrogenase, decarboxylating	Aspergillus clavatus	56 kDa	1	0.051	2	UniRef100_A1DMK7	UniRef100_A2QVN4	UniRef100_B0Y7J6	UniRef100_B2VVG0	UniRef100_B4G1E9	UniRef100_B8N4I0	UniRef100_Q0TX62	UniRef100_Q2HG11	UniRef100_Q874Q3	UniRef100_UPI000023C9EA
45	UniRef100_Q70CE9	1	Glucan endo-1,3-beta-glucosidase (Beta 1-3 glucanase) (Fragment)	Fagus sylvatica	19 kDa	1	0.073	1
46	UniRef100_UPI00017F0A65		PREDICTED: similar to histone cluster 1, H2ag	Sus scrofa	48 kDa	1	0.064	2
47	UniRef100_Q7S9Y8	1	Adenosylhomocysteinase	Neurospora crassa	49 kDa	1	0.06	3
48	UniRef100_Q71E52	1	Cytochrome f (Fragment)	Fagus sylvatica	28 kDa	1	0.13	2
49	UniRef100_B9RVQ5	2	9-cis-epoxycarotenoid dioxygenase, putative	Ricinus communis	61 kDa	1	0.052	3	UniRef100_B9TKB6
50	UniRef100_Q3SA43	1	Putative beta-1,3-glucanase (Fragment)	Fagus sylvatica	29 kDa	1	0.11	2
51	UniRef100_Q9AXQ2	1	Mitochondrial processing peptidase beta subunit	Cucumis melo	59 kDa	1	0.021	3
52	UniRef100_A0A331	61	Photosystem II CP43 chlorophyll apoprotein	Coffea arabica	52 kDa	1	0.097	3	UniRef100_A0ZZ31	UniRef100_A4GGA1	UniRef100_A4GYQ5	UniRef100_A4QJB1	UniRef100_A4QJJ5	UniRef100_A4QK14	UniRef100_A4QKA1	UniRef100_A4QKI8	UniRef100_A4QKS7	UniRef100_A6MM32	UniRef100_A6MMB8	UniRef100_A6MMU0	UniRef100_A7Y3C5	UniRef100_A9QAU9	UniRef100_A9QBZ1	UniRef100_A9QC64	UniRef100_B1NTP4	UniRef100_B1NWE6	UniRef100_B2LMI9	UniRef100_B2XWK1	UniRef100_B5AH11	UniRef100_B5LMM0	UniRef100_B7T2R5	UniRef100_B7T2Y6	UniRef100_B7T357	UniRef100_B7T3C7	UniRef100_B7T3J8	UniRef100_B7T3R9	UniRef100_B7T3Z0	UniRef100_B7T461	UniRef100_P06003	UniRef100_P06004	UniRef100_P06413	UniRef100_P56778	UniRef100_Q06FW0	UniRef100_Q06H01	UniRef100_Q06RD5	UniRef100_Q09G50	UniRef100_Q09MI2	UniRef100_Q09X21	UniRef100_Q0G9M3
53	UniRef100_P11221	2	Major outer membrane lipoprotein	Pseudomonas aeruginosa	9 kDa	1	0.39	4	UniRef100_Q8RL36
54	UniRef100_A6S509	1	ATP synthase subunit alpha	Botryotinia fuckeliana B05.10	61 kDa	1	0.021	1
55	UniRef100_A4RHZ5	6	Putative uncharacterized protein	Magnaporthe grisea	96 kDa	1	0.045	4	UniRef100_A6S2U5	UniRef100_A7EEJ6	UniRef100_B2B0P3	UniRef100_C7YWK4	UniRef100_Q2GNW1
56	UniRef100_Q2VJ43	1	Ubiquitin monomer protein (Fragment)	Morus mongolica	17 kDa	1	0.2	3
57	UniRef100_Q06Z73	1	Fibrillin 8	Coffea canephora	31 kDa	1	0.086	2
58	UniRef100_B9HF65	2	Predicted protein	Populus trichocarpa	61 kDa	1	0.06	3	UniRef100_B9SPU4
59	UniRef100_A1CNV5	6	40S ribosomal protein S5, putative	Aspergillus clavatus	24 kDa	1	0.13	3	UniRef100_A1D1R5	UniRef100_A6RNX9	UniRef100_C4JY85	UniRef100_C5PAF6	UniRef100_UPI0000D86B79
60	UniRef100_C7YIZ8	1	Predicted protein	Nectria haematococca mpVI 77-13-4	54 kDa	1	0.079	3
61	UniRef100_C7Z9T2	2	Predicted protein	Nectria haematococca mpVI 77-13-4	16 kDa	1	0.24	3	UniRef100_UPI000023DB3C
62	UniRef100_P42056	1	Mitochondrial outer membrane protein porin of 36 kDa	Solanum tuberosum	29 kDa	1	0.094	2
63	UniRef100_Q8M9Q5	1	Photosystem II CP47 chlorophyll apoprotein (Fragment)	Fagus grandifolia	50 kDa	1	0.17	6
64	UniRef100_A1KXJ7	19	Oil palm polygalacturonase allergen PEST472	Elaeis guineensis	57 kDa	0.93	0.03	1	UniRef100_A5B6Y2	UniRef100_A5HIJ4	UniRef100_A6N8F8	UniRef100_A6N8F9	UniRef100_B7EK56	UniRef100_B8AVK3	UniRef100_B9FCV2	UniRef100_B9GHC4	UniRef100_B9HS40	UniRef100_B9R777	UniRef100_D1HDI5	UniRef100_D1J3U9	UniRef100_P25776	UniRef100_Q155L4	UniRef100_Q52QX8	UniRef100_Q9SPV0	UniRef100_UPI0001982DE5	UniRef100_UPI00019852E6
65	UniRef100_C6RNU7	2	Conidiation-specific protein 10	Acinetobacter radioresistens SK82	11 kDa	1	0.28	3	UniRef100_D0T258
66	UniRef100_A9PI96	1	Ferritin	Populus trichocarpa	29 kDa	1	0.096	3
67	UniRef100_Q48JY8	1	OprF	Pseudomonas syringae pv. phaseolicola 1448A	37 kDa	1	0.12	3
68	UniRef100_B7FK01	1	Putative uncharacterized protein	Medicago truncatula	37 kDa	1	0.12	3
69	UniRef100_B2W2I0	3	Citrate synthase	Pyrenophora tritici-repentis Pt-1C-BFP	52 kDa	1	0.045	2	UniRef100_C9SCW1	UniRef100_Q0V2M2
70	UniRef100_Q676X3	1	2-cys peroxiredoxin-like protein (Fragment)	Hyacinthus orientalis	22 kDa	0.99	0.071	1
71	UniRef100_B9RZ33	1	Phosphoribulokinase	Ricinus communis	45 kDa	1	0.06	4
72	UniRef100_O78327	1	Transketolase 1	Capsicum annuum	80 kDa	1	0.038	3
73	UniRef100_A0A334	84	Photosystem I P700 chlorophyll a apoprotein A2	Coffea arabica	82 kDa	1	0.035	2	UniRef100_A0ZZ34	UniRef100_A1E9J0	UniRef100_A1E9S3	UniRef100_A1EA07	UniRef100_A4GYQ9	UniRef100_A4QJB4	UniRef100_A4QJJ8	UniRef100_A4QK17	UniRef100_A4QKA4	UniRef100_A4QKJ1	UniRef100_A4QL18	UniRef100_A4QLA5	UniRef100_A4QLJ3	UniRef100_A5BDX5	UniRef100_A6MM35	UniRef100_A6MMC1	UniRef100_A6MMK6	UniRef100_A6MMU3	UniRef100_A7M965	UniRef100_A7Y3D1	UniRef100_A8SEA2	UniRef100_A8W3C3	UniRef100_A8Y9G9	UniRef100_A9L995	UniRef100_A9QBN8	UniRef100_A9QCA6	UniRef100_B1A934	UniRef100_B2LMJ2	UniRef100_B2XWK4	UniRef100_B2ZE96	UniRef100_B3TN50	UniRef100_B5LML7	UniRef100_B7T351	UniRef100_B7T3J2	UniRef100_B7T455	UniRef100_B8R4A1	UniRef100_B8Y2X6	UniRef100_C3KEG6	UniRef100_C3UNX1	UniRef100_C6GJ55	UniRef100_C7BF72
74	UniRef100_A1EGU2	8	Hydroxypyruvate reductase	Solenostemon scutellarioides	42 kDa	1	0.075	2	UniRef100_B0M1A3	UniRef100_B7FL15	UniRef100_B9T0F2	UniRef100_C6TE51	UniRef100_Q19U04	UniRef100_Q84L66	UniRef100_Q84SM7
75	UniRef100_Q02060	1	Photosystem II 22 kDa protein, chloroplastic	Spinacia oleracea	29 kDa	0.93	0.066	2
76	UniRef100_O24601	2	Glycine-rich RNA binding protein 1	Pelargonium x hortorum	17 kDa	1	0.13	2	UniRef100_Q6YNS1
77	UniRef100_P34794	2	RuBisCO large subunit-binding protein subunit alpha, chloroplastic	Brassica napus	62 kDa	1	0.11	5	UniRef100_Q9ZTV1
78	UniRef100_Q2G3K4	1	OmpA/MotB	Novosphingobium aromaticivorans DSM 12444	38 kDa	1	0.056	2
79	UniRef100_A9L981	1	ATP synthase subunit alpha, chloroplastic	Lemna minor	55 kDa	0.93	0.028	1
80	UniRef100_A7F5P3	2	Putative uncharacterized protein	Sclerotinia sclerotiorum 1980 UF-70	30 kDa	1	0.082	3	UniRef100_Q2HDY3
81	UniRef100_A1KXM7	19	FtsH-like protein	Solanum lycopersicum	76 kDa	1	0.052	3	UniRef100_A5B2F0	UniRef100_B8B2K6	UniRef100_B9DHL9	UniRef100_B9DHN3	UniRef100_B9GQ31	UniRef100_B9H5F6	UniRef100_C0PIL7	UniRef100_C0Z226	UniRef100_C4JB77	UniRef100_C9DFA3	UniRef100_D1HEJ2	UniRef100_Q2LAM7	UniRef100_Q39102	UniRef100_Q39444	UniRef100_Q5Z974	UniRef100_Q9BAE0	UniRef100_Q9FH02	UniRef100_UPI00015C8266
82	UniRef100_C6RRC0	2	Entericidin EcnA/B family protein	Acinetobacter radioresistens SK82	5 kDa	1	0.52	4	UniRef100_D0T455
83	UniRef100_B6TMV9	2	Cysteine protease 1	Zea mays	50 kDa	1	0.074	2	UniRef100_C4IZ54
84	UniRef100_A1TQL6	1	Putative uncharacterized protein	Acidovorax citrulli AAC00-1	41 kDa	0.93	0.029	1
85	UniRef100_O49124	4	Putative serine-glyoxylate aminotransferase	Fritillaria agrestis	44 kDa	1	0.085	3	UniRef100_Q6V1W5	UniRef100_Q6V1W7	UniRef100_Q8VYW9
86	UniRef100_A2TJV6	17	Chloroplast HSP70	Cucumis sativus	75 kDa	1	0.04	2	UniRef100_A5BEE7	UniRef100_B1A010	UniRef100_B6UFB3	UniRef100_B9GCK4	UniRef100_B9SKC7	UniRef100_C5YU58	UniRef100_C7ENF7	UniRef100_D1H3A4	UniRef100_D1J111	UniRef100_O04056	UniRef100_O50036	UniRef100_Q08080	UniRef100_Q2QV45	UniRef100_Q39641	UniRef100_UPI0001984F86	UniRef100_UPI0001985592
87	UniRef100_A6RIS9	5	Enolase	Botryotinia fuckeliana B05.10	47 kDa	1	0.073	3	UniRef100_A7EFI1	UniRef100_Q0PV93	UniRef100_Q6RG04	UniRef100_Q7RV85
88	UniRef100_O22077	2	Ribulose bisphosphate carboxylase small chain, chloroplastic	Fagus crenata	20 kDa	1	0.17	3	UniRef100_Q64FQ1
89	UniRef100_B9FLX9	9	Nucleoside diphosphate kinase	Oryza sativa Japonica Group	26 kDa	0.99	0.038	1	UniRef100_B9GL54	UniRef100_C0STY7	UniRef100_C0STY8	UniRef100_C6T3F0	UniRef100_C6T4F9	UniRef100_Q5TKF4	UniRef100_Q8S945	UniRef100_Q9SP13
90	UniRef100_B8AWT0	3	Putative uncharacterized protein	Oryza sativa Indica Group	45 kDa	1	0.085	3	UniRef100_B9FLN8	UniRef100_Q6AUN5
91	UniRef100_D1HJL7	1	Whole genome shotgun sequence of line PN40024, scaffold_68.assembly12x (Fragment)	Vitis vinifera	40 kDa	1	0.058	2
92	UniRef100_B2W5M4	1	Elongation factor 2	Pyrenophora tritici-repentis Pt-1C-BFP	92 kDa	1	0.045	3
93	UniRef100_A1E9B0	46	Vacuolar H+-pyrophosphatase	Kalidium foliatum	80 kDa	1	0.029	2	UniRef100_A2YFJ3	UniRef100_A3ACD7	UniRef100_A4LAP4	UniRef100_A5BB84	UniRef100_A9LRZ1	UniRef100_A9X9A3	UniRef100_B2CHJ2	UniRef100_B6DXD7	UniRef100_B8A390	UniRef100_B8LQU4	UniRef100_B9FQ61	UniRef100_B9I701	UniRef100_B9N710	UniRef100_B9RFI3	UniRef100_B9RVB3	UniRef100_C0PDM0	UniRef100_C5XJS6	UniRef100_C5Z6P5	UniRef100_C5Z8H3	UniRef100_C7FIJ0	UniRef100_D1HWM9	UniRef100_D1IR06	UniRef100_D1J1V3	UniRef100_O22124	UniRef100_O80384	UniRef100_O82680	UniRef100_P21616	UniRef100_Q06572	UniRef100_Q197Z6	UniRef100_Q43798	UniRef100_Q43801	UniRef100_Q5K3Q7	UniRef100_Q67WN5	UniRef100_Q6H883	UniRef100_Q6R4U3	UniRef100_Q75U52	UniRef100_Q75U53	UniRef100_Q7Y070	UniRef100_Q84L25	UniRef100_Q8GT22	UniRef100_Q946X5
94	UniRef100_C1G1F2	1	Elongation factor 1-alpha	Paracoccidioides brasiliensis	50 kDa	1	0.1	3
95	UniRef100_B9RE86	3	Protease, putative	Ricinus communis	64 kDa	1	0.047	2	UniRef100_D1H2Y3	UniRef100_UPI000198502A
96	UniRef100_C4JM20	1	Nucleoside diphosphate kinase	Uncinocarpus reesii 1704	17 kDa	1	0.19	2
97	UniRef100_A9PAF2	1	Nucleoside diphosphate kinase	Populus trichocarpa	16 kDa	0.93	0.11	1
98	UniRef100_B9SZT9	1	Fructose-bisphosphate aldolase	Ricinus communis	43 kDa	0.93	0.023	1
99	UniRef100_A7HKD8	1	Restriction modification system DNA specificity domain	Fervidobacterium nodosum Rt17-B1	49 kDa	0.93	0.021	1
100	UniRef100_A2YE72	27	Putative uncharacterized protein	Oryza sativa Indica Group	59 kDa	1	0.078	3	UniRef100_A3BCW4	UniRef100_A5B7R2	UniRef100_A9NVU9	UniRef100_A9PCK1	UniRef100_A9PHZ3	UniRef100_A9SJK8	UniRef100_A9SP56	UniRef100_A9U1T3	UniRef100_B2BAL3	UniRef100_B6T9C0	UniRef100_B6UHI4	UniRef100_B8A8D4	UniRef100_B9R8F3	UniRef100_B9S5J4	UniRef100_D1HEN9	UniRef100_D1IWU6	UniRef100_P11574	UniRef100_Q40078	UniRef100_Q40079	UniRef100_Q43432	UniRef100_Q8GUB5	UniRef100_Q8W4E2	UniRef100_Q93W07	UniRef100_Q9ASE0	UniRef100_Q9SZN1	UniRef100_UPI0001985643
101	UniRef100_B9GGJ1	9	Predicted protein (Fragment)	Populus trichocarpa	57 kDa	1	0.026	2	UniRef100_B9GGJ7	UniRef100_B9I0Y5	UniRef100_B9I0Y8	UniRef100_B9N5T1	UniRef100_B9NC85	UniRef100_B9NC86	UniRef100_B9SB02	UniRef100_B9SB04
102	UniRef100_P20115	2	Citrate synthase 4, mitochondrial	Arabidopsis thaliana	53 kDa	0.93	0.021	1	UniRef100_P20115-2
103	UniRef100_Q95FI2	1	ATP synthase subunit beta (Fragment)	Xyris sp. Chase 154	52 kDa	1	0.085	2
104	UniRef100_Q9GER1	1	ATP synthase subunit beta (Fragment)	Samolus repens	46 kDa	1	0.062	2
105	UniRef100_A3KIS1	2	Putative peptidyl-prolyl cis-trans isomerase	Streptomyces ambofaciens ATCC 23877	18 kDa	0.93	0.085	2	UniRef100_B2WMD5
106	UniRef100_C7ZD82	1	Predicted protein	Nectria haematococca mpVI 77-13-4	75 kDa	1	0.049	2
107	UniRef100_B9XPE7	1	ATP synthase F1, beta subunit	bacterium Ellin514	52 kDa	0.93	0.031	2
108	UniRef100_Q1NB62	1	OmpA/MotB	Sphingomonas sp. SKA58	38 kDa	1	0.073	2
109	UniRef100_B9HGN8	3	Predicted protein (Fragment)	Populus trichocarpa	41 kDa	0.93	0.032	1	UniRef100_Q2PEW6	UniRef100_Q2PF08
110	UniRef100_B6HK84	1	Nucleoside diphosphate kinase	Penicillium chrysogenum Wisconsin 54-1255	17 kDa	0.93	0.11	1
111	UniRef100_A5A8K5	3	Subtilisin-like serine protease	Acremonium sp. F11177	57 kDa	0.93	0.024	1	UniRef100_P58371	UniRef100_Q1EFQ7
112	UniRef100_A7EJZ9	2	Heat shock protein SSB	Sclerotinia sclerotiorum 1980 UF-70	67 kDa	1	0.085	3	UniRef100_C9SEX9
113	UniRef100_C5PH56	2	6-phosphogluconate dehydrogenase, decarboxylating	Coccidioides posadasii C735 delta SOWgp	54 kDa	0.93	0.029	1	UniRef100_UPI0000D86313
114	UniRef100_C0J9K3	3	ATP synthase subunit beta (Fragment)	Chasmanthera welwitschii	51 kDa	1	0.07	2	UniRef100_C0J9M9	UniRef100_C0J9P6
115	UniRef100_A8D978	25	Histone H4 (Fragment)	Iberis amara	9 kDa	1	0.22	2	UniRef100_B6SYV9	UniRef100_B6T0P4	UniRef100_B6T0U6	UniRef100_B6T152	UniRef100_B6T1T4	UniRef100_B6T275	UniRef100_B6T294	UniRef100_B6T2G0	UniRef100_B6T2X2	UniRef100_B6T4M7	UniRef100_B6TGA3	UniRef100_B6TIH3	UniRef100_B6TJ90	UniRef100_B6U9E1	UniRef100_C1IDW1	UniRef100_C9WCK5	UniRef100_D0EX72	UniRef100_P59259	UniRef100_P62786	UniRef100_P93558	UniRef100_Q27HS8	UniRef100_Q676Z9	UniRef100_Q948T8	UniRef100_UPI0000DD8DD5
116	UniRef100_A7Y2G2	1	Germin-like protein	Chimonanthus praecox	22 kDa	0.92	0.11	2
117	UniRef100_B9HJE0	17	Predicted protein	Populus trichocarpa	63 kDa	0.93	0.021	1	UniRef100_B9HW41	UniRef100_B9SP64	UniRef100_D1I0F3	UniRef100_O43956	UniRef100_O49299	UniRef100_P93262	UniRef100_Q56X28	UniRef100_Q6S3D6	UniRef100_Q93Y04	UniRef100_Q9M4G4	UniRef100_Q9SGC1	UniRef100_Q9SM60	UniRef100_Q9XFT0	UniRef100_Q9ZSQ4	UniRef100_UPI000192734F	UniRef100_UPI0001A7B27A
118	UniRef100_B3N1J9	17	ATP synthase subunit beta	Drosophila ananassae	54 kDa	0.93	0.047	2	UniRef100_A9UCI2	UniRef100_B0WGW0	UniRef100_B4JZN9	UniRef100_B4NHL2	UniRef100_B4PW41	UniRef100_Q05825	UniRef100_Q0GBZ3	UniRef100_Q17FL3	UniRef100_Q17H12	UniRef100_Q1HPT0	UniRef100_Q1HPT1	UniRef100_Q1HR61	UniRef100_Q1ZZQ8	UniRef100_UPI0000DB77FF	UniRef100_UPI000182464A	UniRef100_UPI0001A46D70
119	UniRef100_C3Z8M3	1	ATP synthase subunit beta	Branchiostoma floridae	56 kDa	0.93	0.036	2
120	UniRef100_B2WC39	1	ATP synthase subunit alpha	Pyrenophora tritici-repentis Pt-1C-BFP	76 kDa	1	0.039	2
121	UniRef100_Q94IA8	1	Transketolase	Persicaria tinctoria	67 kDa	0.93	0.015	1
122	UniRef100_A6S046	8	40S ribosomal protein S14	Botryotinia fuckeliana B05.10	16 kDa	0.93	0.067	1	UniRef100_A7E468	UniRef100_B2AXS3	UniRef100_P19115	UniRef100_Q0V1M6	UniRef100_Q2H733	UniRef100_Q5EN09	UniRef100_UPI0000189E22
123	UniRef100_B2VS41	2	Acyl-CoA dehydrogenase family member 11	Pyrenophora tritici-repentis Pt-1C-BFP	53 kDa	0.99	0.025	1	UniRef100_Q0UGD5
124	UniRef100_A8PRI2	1	Putative uncharacterized protein	Malassezia globosa CBS 7966	70 kDa	1	0.02	2
125	UniRef100_O81439	1	Probable plastid-lipid-associated protein 1, chloroplastic	Arabidopsis thaliana	35 kDa	0.93	0.035	1
126	UniRef100_C5CY09	1	Porin	Variovorax paradoxus S110	40 kDa	1	0.06	2
127	UniRef100_A6XBI6	3	Plastid fibrillin 2 (Fragment)	Coffea canephora	25 kDa	0.92	0.044	1	UniRef100_B9GZI8	UniRef100_B9MU64
128	UniRef100_P40108	1	Aldehyde dehydrogenase	Davidiella tassiana	54 kDa	1	0.054	3
129	UniRef100_Q89K42	1	Bll5076 protein	Bradyrhizobium japonicum	60 kDa	0.93	0.015	1
130	UniRef100_A2RAS8	2	Contig An18c0150, complete genome	Aspergillus niger CBS 513.88	34 kDa	1	0.034	1	UniRef100_Q0CT97
131	UniRef100_B9GJB2	2	Predicted protein (Fragment)	Populus trichocarpa	30 kDa	1	0.083	1	UniRef100_Q5ECI7
132	UniRef100_C6TFH5	1	Superoxide dismutase [Cu-Zn]	Glycine max	14 kDa	1	0.22	2
133	UniRef100_A9NU00	10	Putative uncharacterized protein	Picea sitchensis	45 kDa	1	0.068	3	UniRef100_D1IE90	UniRef100_O20252	UniRef100_B6T2L2	UniRef100_C5XPV6	UniRef100_P46283	UniRef100_P46285	UniRef100_Q01M83	UniRef100_Q7XRT0	UniRef100_Q940F8
134	UniRef100_A2WWL6	9	Malate dehydrogenase	Oryza sativa Indica Group	42 kDa	0.93	0.033	1	UniRef100_A2YVI5	UniRef100_B4FG53	UniRef100_B6TCZ3	UniRef100_B9N6Q8	UniRef100_C9EIK5	UniRef100_Q5QLS8	UniRef100_Q6YWL3	UniRef100_UPI0001984C2E
135	UniRef100_D1H5V7	1	Whole genome shotgun sequence of line PN40024, scaffold_4.assembly12x (Fragment)	Vitis vinifera	65 kDa	0.99	0.021	1
136	UniRef100_D0ELH5	1	Cyclophilin	Citrus sinensis	18 kDa	0.93	0.07	1
137	UniRef100_A1CUJ5	11	Carboxypeptidase CpyA/Prc1, putative	Aspergillus clavatus	61 kDa	0.93	0.017	1	UniRef100_A5AB21	UniRef100_A6RUD7	UniRef100_B2WKF1	UniRef100_B8M044	UniRef100_B8NXS9	UniRef100_C4JNM2	UniRef100_Q0CSD3	UniRef100_Q0V1R1	UniRef100_Q2TYA1	UniRef100_Q96VC4
138	UniRef100_B7FKU0	3	Putative uncharacterized protein	Medicago truncatula	31 kDa	0.93	0.035	1	UniRef100_C6SZW1	UniRef100_Q9ZRU2
139	UniRef100_UPI00016E1D7E		UPI00016E1D7E related cluster	Takifugu rubripes	46 kDa	0.93	0.025	1	UniRef100_UPI00016E1D7F	UniRef100_UPI00016E1D80	UniRef100_UPI00016E1D81	UniRef100_UPI00016E1D82	UniRef100_UPI00016E1D83
140	UniRef100_B9SFR3	1	Putative uncharacterized protein	Ricinus communis	21 kDa	0.93	0.062	1
141	UniRef100_B9H6N6	3	Porin/voltage-dependent anion-selective channel protein	Populus trichocarpa	29 kDa	0.93	0.033	1	UniRef100_Q38HV8	UniRef100_Q5CZ53
142	UniRef100_B9N9W6	4	Predicted protein	Populus trichocarpa	72 kDa	0.95	0.018	1	UniRef100_D0NGK0	UniRef100_Q43532	UniRef100_Q9SAU8
143	UniRef100_A5BDU2	12	Putative uncharacterized protein	Vitis vinifera	86 kDa	0.93	0.014	1	UniRef100_A9RCN0	UniRef100_A9TTU4	UniRef100_B9GMY2	UniRef100_B9GYS5	UniRef100_B9S3G1	UniRef100_D1H4J1	UniRef100_Q0WME6	UniRef100_Q2HS34	UniRef100_Q43715	UniRef100_Q9STE8	UniRef100_UPI000198358F
144	UniRef100_B3NSA0	3	GG20235	Drosophila erecta	67 kDa	0.93	0.013	1	UniRef100_B4P5R0	UniRef100_Q7JY99
145	UniRef100_B9ICS6	2	Predicted protein	Populus trichocarpa	60 kDa	0.99	0.03	2	UniRef100_B9R9R9
146	UniRef100_A6RSQ7	2	Putative uncharacterized protein	Botryotinia fuckeliana B05.10	44 kDa	0.99	0.029	1	UniRef100_A7ESA2
147	UniRef100_A4WG29	10	Thioredoxin	Enterobacter sp. 638	12 kDa	1	0.26	2	UniRef100_A8ACT4	UniRef100_A9MJ28	UniRef100_C1MG38	UniRef100_C3SKR2	UniRef100_C9Y4T3	UniRef100_P0AA27	UniRef100_Q14F07	UniRef100_Q57HT5	UniRef100_UPI000190E8C8
148	UniRef100_A4SBB9	31	Serine hydroxymethyltransferase	Ostreococcus lucimarinus CCE9901	57 kDa	1	0.038	2	UniRef100_A6XMY5	UniRef100_A9PIN8	UniRef100_A9PJ09	UniRef100_A9PL06	UniRef100_A9PL10	UniRef100_A9RQ31	UniRef100_A9SHC0	UniRef100_A9YWS0	UniRef100_B7E588	UniRef100_B8LLV3	UniRef100_B9FBQ3	UniRef100_B9GN69	UniRef100_B9HK13	UniRef100_B9HV02	UniRef100_B9SMK7	UniRef100_B9SMX7	UniRef100_C6ZJZ0	UniRef100_D1HCJ7	UniRef100_D1HX29	UniRef100_P34899	UniRef100_P49357	UniRef100_P49358	UniRef100_P50433	UniRef100_Q3E923	UniRef100_Q45FE6	UniRef100_Q6TUC6	UniRef100_Q7Y1F0	UniRef100_Q8GRI1	UniRef100_Q94C74	UniRef100_Q9SZJ5
149	UniRef100_B2W091	1	Aspartate aminotransferase	Pyrenophora tritici-repentis Pt-1C-BFP	50 kDa	0.98	0.022	1
150	UniRef100_Q0UU52	1	Putative uncharacterized protein	Phaeosphaeria nodorum	69 kDa	1	0.017	1
151	UniRef100_B4FBF2	3	Putative uncharacterized protein	Zea mays	58 kDa	0.93	0.027	1	UniRef100_B4FU35	UniRef100_C5X8I6
152	UniRef100_A0A075	49	H+-ATPase proteolipid	Acanthus ebracteatus	17 kDa	0.93	0.11	1	UniRef100_A2ZIG7	UniRef100_A3FFK1	UniRef100_A5ANS5	UniRef100_A9NL02	UniRef100_A9PAW9	UniRef100_A9PBF9	UniRef100_A9PBP4	UniRef100_A9RAU6	UniRef100_A9RCQ7	UniRef100_A9S3D7	UniRef100_B3TLT5	UniRef100_B4FUB9	UniRef100_B7FHD6	UniRef100_B7FMP1	UniRef100_B9HFJ3	UniRef100_B9HRF1	UniRef100_B9R843	UniRef100_B9RG53	UniRef100_B9RJ32	UniRef100_C0HF03	UniRef100_C5YSN4	UniRef100_C6TBY6	UniRef100_O22552	UniRef100_O24011	UniRef100_P23957	UniRef100_P59227	UniRef100_P59228	UniRef100_P59229	UniRef100_P68162	UniRef100_Q0IPT8	UniRef100_Q0IUB5	UniRef100_Q2QX54	UniRef100_Q40585	UniRef100_Q43434	UniRef100_Q5ZFS1	UniRef100_Q65XI1	UniRef100_Q676Z0	UniRef100_Q6Z0Z9	UniRef100_Q84MJ9	UniRef100_Q8VXT2	UniRef100_Q945E8
153	UniRef100_A9Z0V7	6	Carotenoid cleavage dioxygenase 1	Rosa x damascena	62 kDa	0.92	0.018	1	UniRef100_B3FP52	UniRef100_B5ARZ8	UniRef100_Q0H394	UniRef100_Q0H8Z7	UniRef100_Q0H901
154	UniRef100_A5AHP2	10	Putative uncharacterized protein	Vitis vinifera	32 kDa	0.92	0.031	1	UniRef100_A5BVI0	UniRef100_A9PD98	UniRef100_B9RVS2	UniRef100_C6TAY3	UniRef100_C6TH44	UniRef100_D1HSJ2	UniRef100_D1IZY2	UniRef100_Q45Q23	UniRef100_Q4ZGM7
155	UniRef100_A4QT34	22	Cell division control protein Cdc48	Magnaporthe grisea	90 kDa	1	0.015	2	UniRef100_A6QYJ5	UniRef100_A6S3Y2	UniRef100_A7ED00	UniRef100_B2AW14	UniRef100_B2W7P9	UniRef100_B6HJ39	UniRef100_B6Q6M1	UniRef100_B8LYB6	UniRef100_C0SBG7	UniRef100_C1GEJ7	UniRef100_C1H425	UniRef100_C4JUU9	UniRef100_C5FMK5	UniRef100_C5GKY1	UniRef100_C5PDL7	UniRef100_C7YYR4	UniRef100_C9SZ92	UniRef100_Q0UD31	UniRef100_Q2H9U4	UniRef100_Q7RY87	UniRef100_UPI000023ED0A
156	UniRef100_A5DAI9	2	Transaldolase	Pichia guilliermondii	36 kDa	1	0.084	2	UniRef100_UPI000151AB00
157	UniRef100_B2VT43	1	Woronin body major protein	Pyrenophora tritici-repentis Pt-1C-BFP	72 kDa	1	0.042	2
158	UniRef100_Q7LHE2	2	Cyclophilin, cytosolic form	Tolypocladium inflatum	19 kDa	1	0.15	2	UniRef100_Q99009
159	UniRef100_A1D5E3	4	Pectate lyase, putative	Neosartorya fischeri NRRL 181	25 kDa	0.93	0.043	1	UniRef100_B0Y953	UniRef100_B8NJZ7	UniRef100_Q4WKV8
160	UniRef100_A5X2M7	3	60S ribosomal protein L12 (Fragment)	Stachybotrys elegans	12 kDa	1	0.13	1	UniRef100_Q2HAZ9	cont2O00111
161	UniRef100_A9P967	1	Predicted protein	Populus trichocarpa	32 kDa	0.99	0.04	1
162	UniRef100_C6TI22	2	Putative uncharacterized protein	Glycine max	39 kDa	0.98	0.026	1	UniRef100_O49046
163	UniRef100_A9NPA6	2	Nucleoside diphosphate kinase	Picea sitchensis	16 kDa	0.93	0.061	1	UniRef100_A9NZL7
164	UniRef100_B6ZHC0	1	PR-5 protein	Glycine max	26 kDa	0.93	0.042	1
165	UniRef100_B8LQJ2	1	Putative uncharacterized protein	Picea sitchensis	26 kDa	1	0.11	2
166	UniRef100_B8LX15	2	Bifunctional catalase-peroxidase Cat2	Talaromyces stipitatus ATCC 10500	84 kDa	1	0.034	3	UniRef100_Q2H7U1
167	UniRef100_UPI000023F1DE	1	hypothetical protein FG02461.1	Gibberella zeae PH-1	35 kDa	1	0.03	1
168	UniRef100_B8II78	1	Acid phosphatase (Class B)	Methylobacterium nodulans ORS 2060	26 kDa	0.93	0.037	1
169	UniRef100_Q6EW22	1	Cytochrome b6	Nymphaea alba	24 kDa	0.93	0.098	1
170	UniRef100_B9GKG1	1	Predicted protein (Fragment)	Populus trichocarpa	25 kDa	1	0.16	3
171	UniRef100_Q84LB8	1	Glycolate oxidase	Zantedeschia aethiopica	40 kDa	0.93	0.049	1
172	UniRef100_C9SFN5	1	Formate dehydrogenase	Verticillium albo-atrum VaMs.102	40 kDa	1	0.049	2
173	UniRef100_C9SK65	2	Glyceraldehyde-3-phosphate dehydrogenase	Verticillium albo-atrum VaMs.102	36 kDa	0.99	0.03	1	UniRef100_Q3C1T0
174	UniRef100_C6RQL5	2	Putative uncharacterized protein	Acinetobacter radioresistens SK82	24 kDa	1	0.23	2	UniRef100_D0T7N9
175	UniRef100_A5AER7	7	Putative uncharacterized protein	Vitis vinifera	74 kDa	1	0.079	3	UniRef100_B1P2H3	UniRef100_B1P2H4	UniRef100_B9IA25	UniRef100_B9S304	UniRef100_Q9ZP50	UniRef100_UPI00019844D7
176	UniRef100_Q2Z1Y2	1	Serine carboxypeptidase	Prunus mume	56 kDa	1	0.049	2
177	UniRef100_B6HGB8	1	Pc20g11840 protein	Penicillium chrysogenum Wisconsin 54-1255	20 kDa	0.93	0.046	1
178	UniRef100_A9PHJ3	5	Putative uncharacterized protein	Populus trichocarpa	21 kDa	0.93	0.053	1	UniRef100_B9HQR2	UniRef100_B9SCM6	UniRef100_D1IAN1	UniRef100_UPI0001983EA0
179	UniRef100_A2YXH5	18	Putative uncharacterized protein	Oryza sativa Indica Group	14 kDa	1	0.22	2	UniRef100_A2Z2Z0	UniRef100_B6T6H3	UniRef100_B6TC14	UniRef100_B6TKX6	UniRef100_B7E707	UniRef100_B7FJJ4	UniRef100_B8B945	UniRef100_B9GMQ4	UniRef100_B9RFW4	UniRef100_C0P3K5	UniRef100_C5X5A2	UniRef100_C6T827	UniRef100_Q0J0H4	UniRef100_Q6Z1G7	UniRef100_Q9ZQY1	UniRef100_Q9ZQY2	UniRef100_Q9ZQY3
180	UniRef100_C8VMQ7	1	ATP synthase alpha chain, mitochondrial (Broad)	Aspergillus nidulans FGSC A4	60 kDa	0.99	0.023	1
181	UniRef100_C7YME4	1	Superoxide dismutase [Cu-Zn]	Nectria haematococca mpVI 77-13-4	16 kDa	1	0.25	3
182	UniRef100_B6CQT4	4	Putative allergen Pru du 2.01A	Prunus dulcis x Prunus persica	26 kDa	0.93	0.041	1	UniRef100_B6CQT5	UniRef100_B6CQT7	UniRef100_P83332
183	UniRef100_A7EUG8	1	Malate dehydrogenase	Sclerotinia sclerotiorum 1980 UF-70	35 kDa	1	0.057	2
184	UniRef100_Q19NJ4	1	60 kDa chaperonin 2	Enterobacteriaceae	57 kDa	1	0.05	3
185	UniRef100_D1HFG4	1	Whole genome shotgun sequence of line PN40024, scaffold_1.assembly12x (Fragment)	Vitis vinifera	37 kDa	1	0.032	1
186	UniRef100_Q8W3M4	1	Uncharacterized protein At4g06744	Arabidopsis thaliana	45 kDa	0.93	0.027	1
187	UniRef100_Q8L5C8	1	Malate dehydrogenase	Solanum tuberosum	36 kDa	0.93	0.064	1
188	UniRef100_A4V8W3	1	Metallo-endopeptidase	Hypocrea lixii	37 kDa	1	0.058	2
189	UniRef100_C3MJS6	3	Putative uncharacterized protein	Sulfolobus islandicus	18 kDa	0.93	0.13	1	UniRef100_C3MZ34	UniRef100_C4KJP2
190	UniRef100_C5P088	2	ATP synthase subunit alpha	Coccidioides posadasii C735 delta SOWgp	60 kDa	0.93	0.029	1	UniRef100_UPI0000D86F61
191	UniRef100_P30361	2	Cytochrome b6-f complex iron-sulfur subunit 1, chloroplastic	Nicotiana tabacum	24 kDa	1	0.11	2	UniRef100_Q02585
192	UniRef100_A6SCR5	7	Putative uncharacterized protein	Botryotinia fuckeliana B05.10	59 kDa	0.99	0.021	1	UniRef100_A7EG01	UniRef100_B2WJG6	UniRef100_B8PS66	UniRef100_C7YH80	UniRef100_Q0UEG9	UniRef100_UPI000023D513
193	UniRef100_Q6UNN8	1	Cobalamin-independent methionine synthase (Fragment)	Epichloe festucae	77 kDa	1	0.02	2
194	UniRef100_C8Q7W5	1	OmpA domain protein transmembrane region-containing protein	Pantoea sp. At-9b	38 kDa	1	0.07	2
195	UniRef100_B9IMD7	10	Predicted protein	Populus trichocarpa	55 kDa	1	0.046	2	UniRef100_B9STR1	UniRef100_C0P2V1	UniRef100_C5XUF6	UniRef100_P30184	UniRef100_Q0DWU5	UniRef100_Q43034	UniRef100_Q56WM8	UniRef100_Q6K669	UniRef100_Q944P7
196	UniRef100_A3C9R5	4	Putative uncharacterized protein	Oryza sativa Japonica Group	80 kDa	0.93	0.017	1	UniRef100_B8BJP9	UniRef100_Q0ITU3	UniRef100_Q2R8U3
197	UniRef100_C9NC88	2	Thermolysin	Streptomyces flavogriseus ATCC 33331	70 kDa	1	0.032	2	UniRef100_Q82JG1
198	UniRef100_Q53I52	1	Glyceraldehyde-3-phosphate-dehydrogenase	Lupinus albus	32 kDa	0.92	0.068	1
199	UniRef100_B5KUF5	4	Glyceraldehyde-3-phosphate dehydrogenase (Fragment)	Helianthus annuus	22 kDa	0.92	0.049	1	UniRef100_B5KUG0	UniRef100_Q15CX3	UniRef100_Q15D31
200	UniRef100_A9PIE8	2	Putative uncharacterized protein	Populus trichocarpa	34 kDa	0.99	0.039	1	UniRef100_B9IHZ1
201	UniRef100_A0ARF5	17	Cytochrome b559 subunit alpha (Fragment)	Magnoliophyta	9 kDa	1	0.29	2	UniRef100_B0LNC9	UniRef100_B5LMP1	UniRef100_P05170	UniRef100_P13554	UniRef100_P56779	UniRef100_Q1KXU2	UniRef100_Q67HB8	UniRef100_Q67HC6	UniRef100_Q67HE6	UniRef100_Q67HF4	UniRef100_Q67HF8	UniRef100_Q67HN8	UniRef100_Q7YJ37	UniRef100_Q8HRY3	UniRef100_Q8MAW8	UniRef100_Q8MB46
202	UniRef100_P46487	1	Malate dehydrogenase, mitochondrial	Eucalyptus gunnii	36 kDa	0.92	0.032	1
203	UniRef100_A4RI79	7	Putative uncharacterized protein	Magnaporthe grisea	46 kDa	1	0.058	2	UniRef100_B2AE70	UniRef100_C7YSA6	UniRef100_C9S645	UniRef100_Q2GTL1	UniRef100_Q7RW77	UniRef100_UPI000023EB64
204	UniRef100_Q0CCF8	1	Putative uncharacterized protein	Aspergillus terreus NIH2624	25 kDa	0.93	0.081	1
205	UniRef100_A1DP75	9	Carboxypeptidase CpyA/Prc1, putative	Neosartorya fischeri NRRL 181	61 kDa	0.93	0.017	1	UniRef100_A7F4H5	UniRef100_B0XM76	UniRef100_B2AWD5	UniRef100_B6HPP6	UniRef100_B6QAN5	UniRef100_Q5VJG9	UniRef100_Q7RXW8	UniRef100_UPI000023E4C8
206	UniRef100_UPI0001985987		PREDICTED: hypothetical protein	Vitis vinifera	60 kDa	1	0.044	2
207	UniRef100_C5CPL8	1	Porin	Variovorax paradoxus S110	43 kDa	1	0.053	2
208	UniRef100_B4FLP0	3	Putative uncharacterized protein	Zea mays	42 kDa	0.92	0.023	1	UniRef100_B8AGU8	UniRef100_Q6YU90
209	UniRef100_B9IA60	5	Predicted protein	Populus trichocarpa	114 kDa	1	0.025	2	UniRef100_B9RGY1	UniRef100_C5Y397	UniRef100_D1HJD9	UniRef100_UPI00019849C6
210	UniRef100_A1CT41	29	Cell wall integrity signaling protein Lsp1, putative	Aspergillus clavatus	39 kDa	0.97	0.029	1	UniRef100_A1DMF2	UniRef100_A2QPB7	UniRef100_A4RG54	UniRef100_A6RDR8	UniRef100_A6RKQ1	UniRef100_A7EV68	UniRef100_B0Y7E0	UniRef100_B2AY36	UniRef100_B2WAA1	UniRef100_B6HCJ2	UniRef100_B6QLK5	UniRef100_B8MH01	UniRef100_B8MW92	UniRef100_C0NYM0	UniRef100_C0S5T6	UniRef100_C1G2V3	UniRef100_C1H6H9	UniRef100_C5FFX3	UniRef100_C5GWX7	UniRef100_C5K377	UniRef100_C5PJA1	UniRef100_C7YI93	UniRef100_C8VF93	UniRef100_C9SH48	UniRef100_Q0CRL1	UniRef100_Q0V5D8	UniRef100_Q2HFG7	UniRef100_Q7SG47
211	UniRef100_B2TV71	2	Glutaredoxin	Shigella boydii CDC 3083-94	10 kDa	1	0.13	1	UniRef100_P68688
212	UniRef100_Q0UAM1	1	Nucleoside diphosphate kinase	Phaeosphaeria nodorum	17 kDa	0.92	0.11	1
213	UniRef100_B6Q6K2	2	Mitochondrial ADP,ATP carrier protein (Ant), putative	Penicillium marneffei ATCC 18224	34 kDa	0.93	0.038	1	UniRef100_B8M5Y9
214	UniRef100_Q5KFU0	1	ATP synthase subunit beta	Filobasidiella neoformans	59 kDa	0.99	0.024	1
215	UniRef100_A5E3E0	1	Nucleoside diphosphate kinase	Lodderomyces elongisporus	17 kDa	1	0.22	2
216	UniRef100_A8JIJ1	27	Subunit of exon junction complex	Chlamydomonas reinhardtii	49 kDa	0.93	0.023	1	UniRef100_A9P9M6	UniRef100_A9SV98	UniRef100_A9TT23	UniRef100_B4FX58	UniRef100_B6TE13	UniRef100_B9EXG6	UniRef100_B9HA46	UniRef100_B9IKW5	UniRef100_B9RV50	UniRef100_B9TBR5	UniRef100_C0PJ26	UniRef100_C0Z397	UniRef100_C4IZ62	UniRef100_C6TLC4	UniRef100_D1HIP4	UniRef100_D1IST9	UniRef100_Q0JM17	UniRef100_Q0JM17-2	UniRef100_Q56XG6	UniRef100_Q56XG6-2	UniRef100_Q5JK84	UniRef100_Q9LFN6	UniRef100_UPI00017394A9	UniRef100_UPI00019830BF	UniRef100_UPI0001A7B2D1	UniRef100_UPI0001A7B2D2
217	UniRef100_A6YNL9	36	Chitinase	Trichoderma viride	46 kDa	1	0.05	2	UniRef100_B6E5Q4	UniRef100_B7SL82	UniRef100_B8X9S6	UniRef100_B8X9T2	UniRef100_B8X9T3	UniRef100_B8X9T4	UniRef100_B8X9T5	UniRef100_B8X9T6	UniRef100_B8X9T7	UniRef100_Q107X4	UniRef100_Q19AT1	UniRef100_Q2EI12	UniRef100_Q2EI13	UniRef100_Q2EI14	UniRef100_Q2EI15	UniRef100_Q3S4X1	UniRef100_Q45GD7	UniRef100_Q5IS08	UniRef100_Q5IS22	UniRef100_Q65YQ7	UniRef100_Q6XCI9	UniRef100_Q6XCJ0	UniRef100_Q6XCJ3	UniRef100_Q6XCJ4	UniRef100_Q6XCJ6	UniRef100_Q6XCJ7	UniRef100_Q6XCJ8	UniRef100_Q70B22	UniRef100_Q86ZR3	UniRef100_Q9HDE4	UniRef100_Q9HG07	UniRef100_Q9UV34	UniRef100_Q9UV37	UniRef100_Q9UV38	UniRef100_Q9UV41
218	UniRef100_A2QPY3	1	Contig An08c0020, complete genome	Aspergillus niger CBS 513.88	22 kDa	0.99	0.062	2
219	UniRef100_A5ADV7	6	ATP-dependent Clp protease proteolytic subunit	Vitis vinifera	32 kDa	0.92	0.038	1	UniRef100_B9N3L0	UniRef100_B9RBU4	UniRef100_P84982	UniRef100_Q7X9M5	UniRef100_Q9XJ36
220	UniRef100_A8BA83	1	Superoxide dismutase [Cu-Zn]	Hypocrea lixii	16 kDa	0.92	0.11	2
221	UniRef100_A4V8W2	3	Serin endopeptidase	Hypocrea lixii	57 kDa	1	0.046	2	UniRef100_Q06DE8	UniRef100_Q0Q2H0
222	UniRef100_B6HC69	1	Pc18g05490 protein	Penicillium chrysogenum Wisconsin 54-1255	48 kDa	0.99	0.026	1
223	UniRef100_B5M1Y6	1	Alcohol dehydrogenase	Rheum australe	54 kDa	0.93	0.024	1
224	UniRef100_A9PI52	2	Putative uncharacterized protein	Populus trichocarpa	45 kDa	0.92	0.026	1	UniRef100_B9GHR2
225	UniRef100_A9PCR0	2	Malate dehydrogenase	Populus trichocarpa	36 kDa	0.93	0.056	2	UniRef100_B9SE47
226	UniRef100_UPI000194C4F6		PREDICTED: similar to carbamoylphosphate synthetase 2/aspartate transcarbamylase/dihydroorotase, partial	Taeniopygia guttata	209 kDa	0.98	0.0053	1
227	UniRef100_D1ILD9	2	Whole genome shotgun sequence of line PN40024, scaffold_30.assembly12x (Fragment)	Vitis vinifera	21 kDa	0.92	0.071	1	UniRef100_UPI00015CB90B
228	UniRef100_A4W9R6	13	LPP repeat-containing protein	Enterobacter sp. 638	8 kDa	1	0.31	2	UniRef100_B7LQ99	UniRef100_C1M404	UniRef100_C4X9P4	UniRef100_C9Y2S7	UniRef100_P02938	UniRef100_P69778	UniRef100_Q5PH62	UniRef100_Q5PH64	UniRef100_Q8Z6K1	UniRef100_UPI000190C412	UniRef100_UPI00019129AB	UniRef100_UPI0001913FF8
229	UniRef100_A2QMY6	8	Superoxide dismutase [Cu-Zn]	Aspergillus niger CBS 513.88	16 kDa	1	0.15	2	UniRef100_B6QEB3	UniRef100_B8MD44	UniRef100_P85978	UniRef100_Q0CIE1	UniRef100_Q1HDV5	UniRef100_Q9HEY7	UniRef100_UPI0000235DB0
230	UniRef100_C7YTN8	2	Predicted protein	Nectria haematococca mpVI 77-13-4	44 kDa	1	0.042	1	UniRef100_UPI000023F315
231	UniRef100_A9PIP9	6	Putative uncharacterized protein	Populus trichocarpa x Populus deltoides	17 kDa	1	0.11	2	UniRef100_B9H0V6	UniRef100_B9RHA4	UniRef100_Q5K4K8	UniRef100_Q5Y804	UniRef100_Q93YJ3
232	UniRef100_Q2H6T6	1	Malate dehydrogenase	Chaetomium globosum	34 kDa	1	0.052	1
233	UniRef100_B1LWS4	1	Elongation factor Tu	Methylobacterium radiotolerans JCM 2831	43 kDa	1	0.066	2
234	UniRef100_A6N5L8	10	Predicted ATPase terminase subunit	Pseudomonas aeruginosa	68 kDa	0.93	0.013	1	UniRef100_B2FIZ7	UniRef100_B2SUP3	UniRef100_B3G0W3	UniRef100_C1DS30	UniRef100_Q2P513	UniRef100_Q5H253	UniRef100_Q8P6J7	UniRef100_Q8PJ97	UniRef100_Q9ZXM5
235	UniRef100_A1TSA1	15	OmpA/MotB domain protein	Acidovorax citrulli AAC00-1	23 kDa	0.92	0.046	1	UniRef100_A1VR13	UniRef100_A1W8P9	UniRef100_A1WMJ2	UniRef100_A2RPS7	UniRef100_A4G868	UniRef100_A6T1H0	UniRef100_A7TX99	UniRef100_A9BM02	UniRef100_B1Y2L4	UniRef100_C5CTE7	UniRef100_C5T4D5	UniRef100_C9Y9W8	UniRef100_Q12CL0	UniRef100_Q21Y49
236	UniRef100_B4YYB3	12	ST103-2	Thellungiella halophila	9 kDa	0.92	0.15	1	UniRef100_B6SHY0	UniRef100_B9S0H2	UniRef100_C5Z2T3	UniRef100_C5Z2T8	UniRef100_C6SVD6	UniRef100_C6SZW7	UniRef100_D1I9P3	UniRef100_Q2HIQ2	UniRef100_Q8GXJ9	UniRef100_Q9LWT2	UniRef100_Q9MAL8
237	UniRef100_A7IZK8	1	Vacuolar invertase	Coffea canephora	64 kDa	0.92	0.027	1
238	UniRef100_Q7Z8P9	1	Nucleoside diphosphate kinase	Aspergillus fumigatus	17 kDa	0.92	0.059	1
239	UniRef100_A6RUE0	11	60S ribosomal protein L17	Botryotinia fuckeliana B05.10	21 kDa	0.97	0.053	1	UniRef100_A7F4H8	UniRef100_B2B7S7	UniRef100_C0P9K4	UniRef100_C4JY00	UniRef100_C7Z1M1	UniRef100_Q2GXK6	UniRef100_Q5EMW5	UniRef100_Q9HE25	UniRef100_UPI000023D050	cont2O00391
240	UniRef100_Q7XB19	1	Ubiquitin/actin fusion protein (Fragment)	Gymnochlora stellata	49 kDa	0.99	0.029	2
241	UniRef100_A4RCB4	4	Putative uncharacterized protein	Magnaporthe grisea	34 kDa	0.98	0.033	1	UniRef100_B2AUT9	UniRef100_Q2KGG6	UniRef100_Q7SE75
242	UniRef100_B4FHM1	11	Putative uncharacterized protein	Zea mays	33 kDa	0.92	0.053	1	UniRef100_B6SWR9	UniRef100_B6TKU5	UniRef100_B9HPZ7	UniRef100_B9RBM7	UniRef100_B9RUZ9	UniRef100_C4J0P7	UniRef100_D1J389	UniRef100_Q2VU88	UniRef100_Q942X6	UniRef100_UPI0001984CBD
243	UniRef100_B9T155	1	Thylakoid lumenal 25.6 kDa protein, chloroplast, putative	Ricinus communis	27 kDa	1	0.095	2
244	UniRef100_A4U4D2	1	DNA-directed RNA polymerase	Magnetospirillum gryphiswaldense	166 kDa	1	0.0074	1
245	UniRef100_B6H0D9	2	Pc12g06430 protein	Penicillium chrysogenum Wisconsin 54-1255	51 kDa	1	0.06	3	UniRef100_C8VHN4
246	UniRef100_B8LFH7	3	Cyclophilin	Ipomoea batatas	18 kDa	0.93	0.081	1	UniRef100_C7EW65	UniRef100_Q41119
247	UniRef100_A9PA01	10	Predicted protein	Populus trichocarpa	23 kDa	0.93	0.06	1	UniRef100_A9PC71	UniRef100_A9PI10	UniRef100_B9I989	UniRef100_B9RN11	UniRef100_C5XB21	UniRef100_C6TCT7	UniRef100_C7S8D5	UniRef100_C7S917	UniRef100_Q0MYQ7
248	UniRef100_C6DJ47	1	Fimbrial protein	Pectobacterium carotovorum subsp. carotovorum PC1	20 kDa	0.92	0.078	1
249	UniRef100_B9GF37	1	Predicted protein	Populus trichocarpa	41 kDa	1	0.052	2
250	UniRef100_A2QN66	3	Putative frameshift	Aspergillus niger CBS 513.88	24 kDa	0.98	0.042	1	UniRef100_C5FVD1	UniRef100_Q0CIA3
251	UniRef100_A7ELT7	1	Peptidyl-prolyl cis-trans isomerase	Sclerotinia sclerotiorum 1980 UF-70	19 kDa	0.93	0.081	2
252	UniRef100_Q8RXI1	2	Putative chloroplast nucleoid DNA-binding protein	Arabidopsis thaliana	53 kDa	0.93	0.02	1	UniRef100_Q9LS40
253	UniRef100_A3FMB9	30	Proteasome subunit alpha type	Zea mays	27 kDa	0.92	0.044	1	UniRef100_A5BFH7	UniRef100_A9PCR5	UniRef100_A9PCW8	UniRef100_A9RIY7	UniRef100_A9RNI7	UniRef100_A9THW8	UniRef100_A9U3F0	UniRef100_B4F822	UniRef100_B4FFJ8	UniRef100_B4FU28	UniRef100_B6T206	UniRef100_B6TIY7	UniRef100_B9SXV7	UniRef100_C5X6V1	UniRef100_C5YH32	UniRef100_D1H849	UniRef100_D1IWZ4	UniRef100_O24030	UniRef100_O24616	UniRef100_P30186	UniRef100_Q076A9	UniRef100_Q0J006	UniRef100_Q2V3Q0	UniRef100_Q2V988	UniRef100_Q38HT8	UniRef100_Q3HVM9	UniRef100_Q6YT00	UniRef100_Q93X38	UniRef100_Q9SXU1
254	UniRef100_P48210	2	60 kDa chaperonin	Bordetella pertussis	57 kDa	1	0.031	2	UniRef100_Q7WNS4
255	UniRef100_Q2GUM4	1	Putative uncharacterized protein	Chaetomium globosum	49 kDa	1	0.062	2
256	UniRef100_C5FG71	1	Peroxisomal hydratase-dehydrogenase-epimerase	Microsporum canis CBS 113480	96 kDa	0.99	0.015	2
257	UniRef100_A9PH26	2	Putative uncharacterized protein	Populus trichocarpa	69 kDa	0.93	0.016	1	UniRef100_B9IE30
258	UniRef100_C7BFZ4	1	Isoflavone reductase-like protein	Coffea arabica	34 kDa	0.92	0.032	1
259	UniRef100_B6GXL6	5	Pc12g04310 protein	Penicillium chrysogenum Wisconsin 54-1255	50 kDa	1	0.062	2	UniRef100_C4JP48	UniRef100_C5P2A0	UniRef100_Q5G572	UniRef100_UPI0000D868EB
260	UniRef100_B9RHY4	1	Phosphoglycerate kinase	Ricinus communis	50 kDa	0.95	0.035	1
261	UniRef100_UPI00016E81C7		UPI00016E81C7 related cluster	Takifugu rubripes	56 kDa	0.92	0.026	1	UniRef100_UPI00016E81C8	UniRef100_UPI00016E81C9	UniRef100_UPI00016E81CA	UniRef100_UPI00016E81CB	UniRef100_UPI00016E81CC
262	UniRef100_O48902	2	Malate dehydrogenase [NADP], chloroplastic	Medicago sativa	48 kDa	0.98	0.034	1	UniRef100_P21528
263	UniRef100_A9NKY2	4	Putative uncharacterized protein	Picea sitchensis	30 kDa	0.93	0.046	1	UniRef100_B6RF02	UniRef100_Q1AP39	UniRef100_Q5UFR1
264	UniRef100_A4R592	2	Aspartate aminotransferase	Magnaporthe grisea	50 kDa	0.93	0.022	1	UniRef100_B2ACQ8
265	UniRef100_UPI000023E582	1	hypothetical protein FG09739.1	Gibberella zeae PH-1	46 kDa	0.93	0.024	1
266	UniRef100_B6HCW6	1	Mitochondrial ADP/ATP carrier BAC82547-Penicillium chrysogenum	Penicillium chrysogenum Wisconsin 54-1255	34 kDa	0.92	0.038	1
267	UniRef100_B9N9W5	4	Predicted protein	Populus trichocarpa	72 kDa	0.92	0.018	1	UniRef100_P26413	UniRef100_Q40980	UniRef100_Q9S9N1
268	UniRef100_A7EQJ7	14	Phosphorylase	Sclerotinia sclerotiorum 1980 UF-70	73 kDa	0.93	0.015	1	UniRef100_B2ASM0	UniRef100_B2W405	UniRef100_B6QCP4	UniRef100_B8M2B5	UniRef100_C0SGG2	UniRef100_C1GPV0	UniRef100_C5GCC1	UniRef100_C5JMU0	UniRef100_C7Z4R5	UniRef100_C9SJC6	UniRef100_Q0D0Q0	UniRef100_Q0U454	UniRef100_Q7S9A9
269	UniRef100_A1CF77	20	Coatomer subunit gamma, putative	Aspergillus clavatus	101 kDa	0.98	0.013	1	UniRef100_A1CYV8	UniRef100_A4RCC3	UniRef100_A6RLB0	UniRef100_A7EB69	UniRef100_B0XTZ8	UniRef100_B2AUU5	UniRef100_B2WBE7	UniRef100_B6GZ23	UniRef100_B8NFS3	UniRef100_C7YMZ5	UniRef100_C8V880	UniRef100_C9S9C6	UniRef100_Q0CHB9	UniRef100_Q0V6U3	UniRef100_Q2H459	UniRef100_Q2KGH5	UniRef100_Q5B4I3	UniRef100_UPI000023DFCD	UniRef100_UPI0000EFB395
270	UniRef100_A8N7C6	1	40S ribosomal protein S0	Coprinopsis cinerea okayama7#130	32 kDa	0.92	0.041	1
271	UniRef100_A6SHK9	2	Putative uncharacterized protein	Botryotinia fuckeliana B05.10	86 kDa	0.92	0.012	1	UniRef100_A7F002
272	UniRef100_A4R931	4	Histone H4	Pezizomycotina	11 kDa	0.93	0.17	1	UniRef100_B2B229	UniRef100_Q2GP06	UniRef100_Q5G5A0
273	UniRef100_UPI0000382857		hypothetical protein Magn03001403	Magnetospirillum magnetotacticum MS-1	12 kDa	0.91	0.091	1
274	UniRef100_D0T720	1	Predicted protein	Acinetobacter radioresistens	11 kDa	0.93	0.18	2
275	UniRef100_A0ZZ21	1	ATP synthase subunit b, chloroplastic	Gossypium	21 kDa	0.92	0.13	1
276	UniRef100_B9D2W6	1	ATPase, AAA family protein	Campylobacter rectus RM3267	72 kDa	0.92	0.019	1
277	UniRef100_Q5ZE49	1	Putative uncharacterized protein P0006C01.45	Oryza sativa Japonica Group	8 kDa	0.92	0.13	1
278	UniRef100_A1IIE3	10	Malate dehydrogenase (Fragment)	Iris x hollandica	33 kDa	0.93	0.065	1	UniRef100_B2ZAF9	UniRef100_B7FJQ4	UniRef100_B9NBW3	UniRef100_B9T5E4	UniRef100_O24047	UniRef100_O48905	UniRef100_Q08062	UniRef100_Q8GZN3	UniRef100_Q9FSF0
279	UniRef100_B7JNY1	1	Putative uncharacterized protein	Bacillus cereus AH820	69 kDa	0.92	0.019	1
280	UniRef100_A1DNC2	7	ATP citrate lyase, subunit 1, putative	Neosartorya fischeri NRRL 181	72 kDa	1	0.052	4	UniRef100_A4R290	UniRef100_A7EAP7	UniRef100_B0Y8A8	UniRef100_Q0CVA9	UniRef100_Q4WM99	UniRef100_Q5BAJ4
281	UniRef100_A5ASW8	3	Putative uncharacterized protein	Vitis vinifera	27 kDa	0.93	0.07	1	UniRef100_B2BFG9	UniRef100_Q9XQB6
282	UniRef100_P37211	1	ATP synthase subunit alpha, mitochondrial	Neurospora crassa	60 kDa	0.93	0.024	1
283	UniRef100_B2W2V5	1	ADP,ATP carrier protein	Pyrenophora tritici-repentis Pt-1C-BFP	34 kDa	1	0.11	2
284	UniRef100_B9HEW3	2	Predicted protein (Fragment)	Populus trichocarpa	70 kDa	0.93	0.022	1	UniRef100_B9SWW3
285	UniRef100_A5AZX9	4	Triosephosphate isomerase	Vitis vinifera	27 kDa	0.93	0.056	1	UniRef100_B9VRG4	UniRef100_D1H4M5	UniRef100_Q3HRV9
286	UniRef100_B3TLP2	1	Light-inducible protein ATLS1	Elaeis guineensis	12 kDa	0.92	0.1	1
287	UniRef100_Q94I89	2	Putative NtPRp27-like protein (Fragment)	Atropa belladonna	25 kDa	1	0.09	2	UniRef100_Q9XIY9
288	UniRef100_B2B2M8	1	Predicted CDS Pa_6_2660	Podospora anserina	93 kDa	0.98	0.017	1
289	UniRef100_B1W0S5	11	Trypsin	Streptomyces griseus	26 kDa	0.92	0.043	1	UniRef100_B4VG02	UniRef100_C9NKX5	UniRef100_C9Z578	UniRef100_P00775	UniRef100_P80420	UniRef100_Q6PPC0	UniRef100_Q82A51	UniRef100_UPI0001AED629	UniRef100_UPI0001B4BA35	UniRef100_UPI0001B4D300
290	UniRef100_C7YMF8	2	Predicted protein	Nectria haematococca mpVI 77-13-4	30 kDa	1	0.046	1	cont2O00790
291	UniRef100_A9EV31	1	Putative uncharacterized protein	Sorangium cellulosum 'So ce 56'	61 kDa	0.93	0.03	1
292	UniRef100_A4QZX7	6	Putative uncharacterized protein	Magnaporthe grisea	62 kDa	0.93	0.023	1	UniRef100_C9SVN5	UniRef100_P34054	UniRef100_P87251	UniRef100_Q1K4N1	UniRef100_Q8X0I5
293	UniRef100_C8VUL6	3	Hypothetical serine protease (Eurofung)	Aspergillus nidulans FGSC A4	50 kDa	0.93	0.027	1	UniRef100_Q0CID8	UniRef100_Q5BGU2
294	UniRef100_A8DNH8	9	Alpha tubulin (Fragment)	Hypocreales	49 kDa	0.98	0.032	1	UniRef100_A8DNI8	UniRef100_A8DNJ0	UniRef100_A8DNJ4	UniRef100_A8DNM8	UniRef100_A8DNM9	UniRef100_B8XF47	UniRef100_B8XF52	UniRef100_Q5I2J3
295	UniRef100_A6RKG7	2	Putative uncharacterized protein	Botryotinia fuckeliana B05.10	47 kDa	0.93	0.034	1	UniRef100_A7E4J8
296	UniRef100_A2R932	9	Complex: SSB2 of S. cerevisiae binds to ribosomes and nascent polypeptide chains	Aspergillus niger	67 kDa	0.99	0.029	1	UniRef100_B0YA72	UniRef100_B2WCZ5	UniRef100_B8MHL7	UniRef100_B8MHL8	UniRef100_B8MHL9	UniRef100_O42808	UniRef100_Q0D231	UniRef100_Q0UV10
297	UniRef100_A8IXT9	23	Temperature-induced lipocalin	Brassica rapa	21 kDa	0.92	0.056	1	UniRef100_A9PJ17	UniRef100_B6V700	UniRef100_B6V701	UniRef100_B9IMG7	UniRef100_B9SBY6	UniRef100_Q38JB8	UniRef100_Q38JB9	UniRef100_Q38JC0	UniRef100_Q38JC1	UniRef100_Q38JC2	UniRef100_Q38JC3	UniRef100_Q38JC4	UniRef100_Q38JC6	UniRef100_Q38JC7	UniRef100_Q38JD2	UniRef100_Q38JD4	UniRef100_Q38JD8	UniRef100_Q38JE0	UniRef100_Q38JE1	UniRef100_Q5J0W3	UniRef100_Q8LE12	UniRef100_Q9FGT8
298	UniRef100_B8DCY6	5	D-isomer specific 2-hydroxyacid dehydrogenase family protein	Listeria monocytogenes	43 kDa	0.93	0.028	1	UniRef100_C8JSG5	UniRef100_UPI0001975C8F	UniRef100_UPI0001B42F8F	UniRef100_UPI0001B43724
299	UniRef100_A0JZJ7	116	Aldehyde dehydrogenase (NAD(+))	Arthrobacter sp. FB24	55 kDa	0.93	0.022	1	UniRef100_A0PLH7	UniRef100_A0QLN1	UniRef100_A0QQW5	UniRef100_A0QSN7	UniRef100_A1B4L2	UniRef100_A1R4J6	UniRef100_A1R953	UniRef100_A1RDN4	UniRef100_A1SIG6	UniRef100_A1T550	UniRef100_A1TS54	UniRef100_A1UAJ8	UniRef100_A1W745	UniRef100_A1WNM7	UniRef100_A2RPR1	UniRef100_A3THL9	UniRef100_A4TEK1	UniRef100_A4U358	UniRef100_A5FZB5	UniRef100_A5LHA2	UniRef100_A5V454	UniRef100_A5VND2	UniRef100_A5WEQ0	UniRef100_A6UBR2	UniRef100_A6WD47	UniRef100_A6WVJ8	UniRef100_A9B0T7	UniRef100_A9M7E4	UniRef100_B0CJ59	UniRef100_B0RLL1	UniRef100_B1G3R2	UniRef100_B1HNP3	UniRef100_B1M778	UniRef100_B1MJA8	UniRef100_B1VQ79	UniRef100_B1YHJ5	UniRef100_B1Z7G2	UniRef100_B2GL80	UniRef100_B2HH61	UniRef100_B2JJA5	UniRef100_B2SZ97
300	UniRef100_A5K8M0	3	ATP synthase subunit beta	Plasmodium vivax	59 kDa	0.92	0.022	1	UniRef100_B3LD12	UniRef100_Q8I0V2
301	UniRef100_A2QSB1	80	Function: the Gsp1	Aspergillus niger CBS 513.88	24 kDa	1	0.12	2	UniRef100_A5A1D9	UniRef100_A5DG78	UniRef100_A5DWZ8	UniRef100_A6R6C9	UniRef100_A6RIW2	UniRef100_A7EGT2	UniRef100_A7SG05	UniRef100_A7TPD5	UniRef100_A8NES1	UniRef100_A8Q6H9	UniRef100_A8Q704	UniRef100_B0XME8	UniRef100_B2A8T2	UniRef100_B5FYI3	UniRef100_B5MDF5	UniRef100_B6HP22	UniRef100_B6JXY9	UniRef100_B6QAA0	UniRef100_B8N442	UniRef100_B9WBS9	UniRef100_C0NHE6	UniRef100_C0SA80	UniRef100_C1BEN8	UniRef100_C1BM05	UniRef100_C1BUI8	UniRef100_C1C0Y9	UniRef100_C1C1H6	UniRef100_C1C3P8	UniRef100_C1H1K7	UniRef100_C3KIN0	UniRef100_C3XVK6	UniRef100_C4JR05	UniRef100_C4R0Q2	UniRef100_C4Y094	UniRef100_C5DN80	UniRef100_C5DWH1	UniRef100_C5FKY8	UniRef100_C5GQ05	UniRef100_C5NZ36	UniRef100_C7YKN1	UniRef100_C8VGD6
302	UniRef100_A6STD0	7	40S ribosomal protein S20	Botryotinia fuckeliana B05.10	13 kDa	0.91	0.1	1	UniRef100_A7F429	cont2A01174	cont2K01646	cont2K01939	cont2O01495	cont2S01620
303	UniRef100_A1CH83	21	Pyruvate carboxylase, putative	Aspergillus clavatus	131 kDa	0.97	0.01	1	UniRef100_A1CXK2	UniRef100_A2QI31	UniRef100_A4QYR8	UniRef100_A6RX62	UniRef100_A7F5G1	UniRef100_B0Y5W4	UniRef100_B2A941	UniRef100_B2WFT6	UniRef100_C0NAG1	UniRef100_C5GFT7	UniRef100_C5JH62	UniRef100_C5PE04	UniRef100_C6H4X5	UniRef100_C8V8H9	UniRef100_C9SIZ2	UniRef100_Q0UXL0	UniRef100_Q4WP18	UniRef100_Q7SHV6	UniRef100_Q9HES8	UniRef100_UPI0000D883E7
304	UniRef100_C7YR12	2	Predicted protein	Nectria haematococca mpVI 77-13-4	15 kDa	1	0.25	2	cont2S01388
305	UniRef100_A1C653	10	Heat shock protein 70 (Hsp70)	Aspergillus clavatus	73 kDa	0.93	0.018	1	UniRef100_A1DGS9	UniRef100_B0XS36	UniRef100_B6HQE1	UniRef100_B8NB87	UniRef100_Q0CPF2	UniRef100_Q4X1H5	UniRef100_Q5B0C0	UniRef100_Q7RVX2	UniRef100_UPI000023ED2D
306	UniRef100_Q00070	1	Pepsinogen	Aspergillus niger	43 kDa	1	0.08	2
307	UniRef100_Q9ZRU8	1	Stress and pathogenesis-related protein	Fagus sylvatica	17 kDa	1	0.25	3
308	UniRef100_Q883Q1	1	Outer membrane porin OprF	Pseudomonas syringae pv. tomato	37 kDa	0.93	0.061	1
309	UniRef100_B2AMK1	7	Predicted CDS Pa_5_7040	Podospora anserina	43 kDa	0.93	0.03	1	UniRef100_C7Z894	UniRef100_O59937	UniRef100_P46239	UniRef100_Q0TXB3	UniRef100_Q2HHK0	UniRef100_Q8NJ73
310	UniRef100_A4RV66	4	Ribosomal protein L12, component of cytosolic 80S ribosome and 60S large subunit	Ostreococcus lucimarinus CCE9901	18 kDa	0.93	0.09	1	UniRef100_C1FEF5	UniRef100_C1MGT4	UniRef100_Q01BX3
311	UniRef100_C7YKD6	2	Putative uncharacterized protein	Nectria haematococca mpVI 77-13-4	99 kDa	0.93	0.012	1	UniRef100_UPI000023E800
312	UniRef100_B6HHG9	1	Pc21g00870 protein	Penicillium chrysogenum Wisconsin 54-1255	53 kDa	0.98	0.018	1
313	UniRef100_UPI00019841D8		PREDICTED: hypothetical protein isoform 1	Vitis vinifera	41 kDa	0.92	0.027	1
314	UniRef100_A6XHH1	1	Superoxide dismutase (Fragment)	Fagus sylvatica	18 kDa	1	0.21	2
315	UniRef100_C6SW24	2	Putative uncharacterized protein	Glycine max	23 kDa	0.98	0.074	1	UniRef100_C6SY85
316	UniRef100_A0A4J9	11	Beta tubulin (Fragment)	Thaumatomonas sp. TMT002	42 kDa	0.99	0.032	1	UniRef100_B1B3R7	UniRef100_C0SKC4	UniRef100_C0SKC5	UniRef100_C0SKD7	UniRef100_Q0H2B5	UniRef100_Q0H2B7	UniRef100_Q0H2B8	UniRef100_Q0H2C3	UniRef100_Q0H2C4	UniRef100_Q84KM0
317	UniRef100_Q55T85	9	Putative uncharacterized protein	Filobasidiella neoformans	62 kDa	1	0.04	2	UniRef100_A1CEV4	UniRef100_A1CZ48	UniRef100_B0XUM7	UniRef100_B6HBR0	UniRef100_C8VPU1	UniRef100_Q0C9U7	UniRef100_Q5KJ56	UniRef100_Q5VJG7
318	UniRef100_P27774	1	Phosphoribulokinase, chloroplastic	Mesembryanthemum crystallinum	44 kDa	0.92	0.03	1
319	UniRef100_C6Y271	1	Elongation factor Tu	Pedobacter heparinus DSM 2366	43 kDa	1	0.068	2
320	UniRef100_UPI000023D878	1	hypothetical protein FG05972.1	Gibberella zeae PH-1	26 kDa	0.92	0.071	1
321	UniRef100_A7KNG1	18	Cytochrome c oxidase subunit 2 (Fragment)	Arabidopsis thaliana	27 kDa	0.92	0.042	1	UniRef100_B5KXY8	UniRef100_B9NCB0	UniRef100_B9U3K3	UniRef100_O47437	UniRef100_O47797	UniRef100_O47798	UniRef100_O48328	UniRef100_P93285	UniRef100_Q6YSL6	UniRef100_Q6YSQ9	UniRef100_Q7ITW0	UniRef100_Q9MM51	UniRef100_Q9MM53	UniRef100_Q9MM54	UniRef100_Q9MM56	UniRef100_Q9MM58	UniRef100_Q9T6Q6
322	UniRef100_A6FHK9	1	Putative uncharacterized protein	Moritella sp. PE36	10 kDa	0.93	0.11	1
323	UniRef100_Q2HBC5	1	Putative uncharacterized protein	Chaetomium globosum	56 kDa	0.98	0.029	1
324	UniRef100_Q9S886	1	Basic chitinase (Fragment)	Citrus sinensis	3 kDa	0.92	0.79	1
325	UniRef100_C9SIM8	1	DNA damage checkpoint protein rad24	Verticillium albo-atrum VaMs.102	30 kDa	0.92	0.044	1
326	UniRef100_P47919	3	Nucleoside diphosphate kinase A	Flaveria bidentis	16 kDa	1	0.095	2	UniRef100_P47921	UniRef100_Q3Y5A4
327	UniRef100_A3QVX4	46	Glucose-6-phosphate isomerase	Marchantia polymorpha	72 kDa	0.93	0.018	1	UniRef100_A8IE23	UniRef100_B6E5W6	UniRef100_B9HJ12	UniRef100_B9R7S8	UniRef100_C6TGC6	UniRef100_O22078	UniRef100_O22092	UniRef100_O22093	UniRef100_O22094	UniRef100_O22095	UniRef100_O23903	UniRef100_O23904	UniRef100_O23905	UniRef100_O23906	UniRef100_O23907	UniRef100_O24604	UniRef100_O24615	UniRef100_O24644	UniRef100_P34796	UniRef100_P54234	UniRef100_P54235	UniRef100_P54236	UniRef100_P54237	UniRef100_P54238	UniRef100_P54239	UniRef100_P54240	UniRef100_Q1PCD2	UniRef100_Q68HC9	UniRef100_Q70SK1	UniRef100_Q70SK2	UniRef100_Q70SK3	UniRef100_Q70SL1	UniRef100_Q70SL7	UniRef100_Q70SM0	UniRef100_Q7DN41	UniRef100_Q8L6U9	UniRef100_Q8L6V1	UniRef100_Q8L6V4	UniRef100_Q8RW62	UniRef100_Q8RW65	UniRef100_Q8RW66
328	UniRef100_P84721	1	Putative NAD(P)-dependent glyceraldehyde-3-phosphate dehydrogenase PS5 (Fragments)	Pinus strobus	4 kDa	0.92	0.35	1
329	UniRef100_B2A1Z7	1	Putative uncharacterized protein	Natranaerobius thermophilus JW/NM-WN-LF	56 kDa	0.91	0.027	1
330	UniRef100_B8M045	1	Ribosomal protein S13p/S18e	Talaromyces stipitatus ATCC 10500	19 kDa	0.92	0.067	1
331	UniRef100_C5ALD9	1	Rhs family protein	Burkholderia glumae BGR1	127 kDa	0.93	0.007	1
332	UniRef100_A9NYS4	10	Proteasome subunit beta type	Picea sitchensis	29 kDa	0.93	0.037	1	UniRef100_A9NZ27	UniRef100_B7FKR0	UniRef100_B9HL00	UniRef100_C3VIB8	UniRef100_C6TLJ9	UniRef100_D1I2I0	UniRef100_Q287S2	UniRef100_Q6B443	UniRef100_Q93X31
333	UniRef100_A7QEU4	3	Peroxidase 5	Vitis vinifera	39 kDa	1	0.05	2	UniRef100_D1HPL2	UniRef100_UPI0001984F78
334	UniRef100_A4UCI5	12	Putative uncharacterized protein	Magnaporthe grisea	43 kDa	0.98	0.041	2	UniRef100_A6SH57	UniRef100_A7EIR7	UniRef100_B2B4G6	UniRef100_B6HAK8	UniRef100_B6Q3T5	UniRef100_B8M7H3	UniRef100_B8NLX2	UniRef100_C7Z1D5	UniRef100_Q0CJE2	UniRef100_Q96U86	UniRef100_UPI000023E687
335	UniRef100_B9IJN4	5	Predicted protein	Populus trichocarpa	44 kDa	0.99	0.032	2	UniRef100_B9RUU4	UniRef100_D1INI7	UniRef100_O22636	UniRef100_O49939
336	UniRef100_B2FPR0	2	Putative TonB dependent receptor	Stenotrophomonas maltophilia K279a	100 kDa	1	0.032	2	UniRef100_B4SRD9
337	UniRef100_B2B0U9	3	Predicted CDS Pa_3_7380 (Fragment)	Podospora anserina	70 kDa	0.91	0.021	1	UniRef100_P16929	UniRef100_UPI000023EDB4
338	UniRef100_A0A330	126	Photosystem II D2 protein	core eudicotyledons	40 kDa	0.92	0.062	1	UniRef100_A0AS14	UniRef100_A0AS16	UniRef100_A0AS26	UniRef100_A0AS28	UniRef100_A0AS32	UniRef100_A0AS40	UniRef100_A0AS42	UniRef100_A0AS46	UniRef100_A0AS48	UniRef100_A0AS50	UniRef100_A0AS52	UniRef100_A0AS56	UniRef100_A0AS63	UniRef100_A1E9Q9	UniRef100_A1E9Z3	UniRef100_A2RQK8	UniRef100_A4GGA2	UniRef100_A4GKM9	UniRef100_A4GKN1	UniRef100_A4GKN3	UniRef100_A4GYQ4	UniRef100_A4QJB0	UniRef100_A4QJJ4	UniRef100_A4QK13	UniRef100_A4QKA0	UniRef100_A4QLI9	UniRef100_A6BM16	UniRef100_A6H5G6	UniRef100_A6MM31	UniRef100_A6MMB7	UniRef100_A6MMK2	UniRef100_A6MMT9	UniRef100_A7M961	UniRef100_A7Y3C4	UniRef100_A8SE98	UniRef100_A8W3B9	UniRef100_A8Y9F5	UniRef100_A9L991	UniRef100_A9QBD6	UniRef100_A9QBM9	UniRef100_A9QBV0
339	UniRef100_D1IFH6	1	Whole genome shotgun sequence of line PN40024, scaffold_26.assembly12x (Fragment)	Vitis vinifera	58 kDa	0.93	0.028	1
340	UniRef100_B6XD36	1	Putative uncharacterized protein	Providencia alcalifaciens DSM 30120	13 kDa	0.93	0.098	1
341	UniRef100_A2QDM7	21	Catalytic activity: alpha-D-Glucose 1-phosphate = alpha-D-Glucose 6-phosphate	Aspergillus niger CBS 513.88	60 kDa	0.93	0.022	1	UniRef100_A6RGP1	UniRef100_A7EMC6	UniRef100_B2AM48	UniRef100_B2WEJ3	UniRef100_B6Q1E8	UniRef100_B8M4J7	UniRef100_C0NUW5	UniRef100_C0S3K7	UniRef100_C1G1E1	UniRef100_C1GU16	UniRef100_C5FDD3	UniRef100_C5G9X1	UniRef100_C6HRI3	UniRef100_C7YHK8	UniRef100_C9SMP7	UniRef100_Q0CNL0	UniRef100_Q0UIH7	UniRef100_Q7SCJ9	UniRef100_Q9P931	UniRef100_UPI000023D596
342	UniRef100_A2R9F2	12	Remark: manual BLASTP homologue PIR:DERTCM	Aspergillus niger CBS 513.88	50 kDa	0.92	0.027	1	UniRef100_B0Y3F8	UniRef100_B6QG58	UniRef100_B8MBQ4	UniRef100_B8NRJ7	UniRef100_C0SG71	UniRef100_C1G278	UniRef100_C1GPJ0	UniRef100_C5FW13	UniRef100_C7YUI8	UniRef100_C9S924	UniRef100_Q2UTT8
343	UniRef100_B2AAR4	4	Predicted CDS Pa_1_4920	Podospora anserina	26 kDa	0.92	0.059	1	UniRef100_C7YIQ2	UniRef100_Q9HFU2	UniRef100_Q9HFU3
344	UniRef100_C7QBH5	1	Transcriptional regulator, XRE family	Catenulispora acidiphila DSM 44928	45 kDa	0.92	0.02	1
345	UniRef100_Q5K8H5	1	Histone H4	Filobasidiella neoformans	11 kDa	0.92	0.078	1
346	UniRef100_A6RW23	2	Putative uncharacterized protein	Botryotinia fuckeliana B05.10	27 kDa	0.92	0.063	1	UniRef100_A7EMI6
347	UniRef100_Q01294	1	Vacuolar protease A	Neurospora crassa	43 kDa	0.93	0.03	1
348	UniRef100_C2M3V7	1	Chaperone and heat shock protein 70	Capnocytophaga gingivalis ATCC 33624	67 kDa	0.92	0.017	1
349	UniRef100_Q3V2E0	3	Putative uncharacterized protein	Mus musculus	27 kDa	0.93	0.078	1	UniRef100_Q9QUK9	UniRef100_Q9R0T7
350	UniRef100_A7BLS3	2	Putative uncharacterized protein	Beggiatoa sp. SS	27 kDa	0.92	0.033	1	UniRef100_A7BPH4
351	UniRef100_B9S1F6	1	Protein dif-1, putative	Ricinus communis	31 kDa	0.99	0.03	1
352	UniRef100_C9SKV4	1	Stomatin-2	Verticillium albo-atrum VaMs.102	37 kDa	0.98	0.044	2
353	UniRef100_Q68KY2	1	Beta-glucosidase	Phaeosphaeria avenaria f. sp. triticae	94 kDa	0.99	0.017	1
354	UniRef100_C6RM02	1	Putative uncharacterized protein	Acinetobacter radioresistens	11 kDa	1	0.25	2
355	UniRef100_D0T5P6	1	Putative uncharacterized protein	Acinetobacter radioresistens SH164	22 kDa	1	0.19	2
356	UniRef100_A2IBY3	30	OmpE36	Enterobacter aerogenes	41 kDa	0.93	0.03	1	UniRef100_A4WCN0	UniRef100_A6TBT2	UniRef100_A7MHS0	UniRef100_A8AE00	UniRef100_B2VIM3	UniRef100_B5XNZ9	UniRef100_B9VMB2	UniRef100_B9VMB3	UniRef100_B9VMB4	UniRef100_C1M9L3	UniRef100_C2B2Y5	UniRef100_C4XBC3	UniRef100_C8QDN6	UniRef100_C8T735	UniRef100_C9EC81	UniRef100_C9XWM5	UniRef100_D1L3X2	UniRef100_D1L3X3	UniRef100_Q2I354	UniRef100_Q2NU93	UniRef100_Q48473	UniRef100_Q93K39	UniRef100_Q93K98	UniRef100_Q93K99	UniRef100_Q9AGC8	UniRef100_Q9AGC9	UniRef100_Q9AGD0	UniRef100_Q9AGD1	UniRef100_Q9ALY0
357	UniRef100_P12355	1	Photosystem I reaction center subunit III, chloroplastic	Spinacia oleracea	25 kDa	0.92	0.065	1
358	UniRef100_A4UBZ2	5	Putative uncharacterized protein	Magnaporthe grisea	94 kDa	0.93	0.014	1	UniRef100_A9XK87	UniRef100_A9XK88	UniRef100_C9SYX2	UniRef100_O74240
359	UniRef100_A4QYX6	1	Putative uncharacterized protein	Magnaporthe grisea	48 kDa	0.93	0.022	1
360	UniRef100_A7Y7M4	1	Malic enzyme (Fragment)	Prunus dulcis	26 kDa	0.93	0.043	1
361	UniRef100_B5H9S4	2	Streptogrisin-B	Streptomyces pristinaespiralis ATCC 25486	31 kDa	0.99	0.063	1	UniRef100_UPI0001B55738
362	UniRef100_A9QBZ4	57	ATP synthase epsilon chain (Fragment)	Scaevola aemula	15 kDa	0.92	0.11	1	UniRef100_B1NWF6	UniRef100_B2LMJ9	UniRef100_D1M7N1	UniRef100_Q09X11	UniRef100_Q0ZJ14	UniRef100_Q1KXV3	UniRef100_Q2MII1	UniRef100_Q332X2	UniRef100_Q33C28	UniRef100_Q3C1J6	UniRef100_Q68S00	UniRef100_Q8M8T9	UniRef100_Q8M8U4	UniRef100_Q8M8U8	UniRef100_Q8M8V5	UniRef100_Q8M8V9	UniRef100_Q8M8W1	UniRef100_Q8M8W7	UniRef100_Q8M8X5	UniRef100_Q8M8X7	UniRef100_Q8M8Z3	UniRef100_Q8M918	UniRef100_Q8M923	UniRef100_Q8M938	UniRef100_Q8M940	UniRef100_Q8M945	UniRef100_Q8M947	UniRef100_Q8M954	UniRef100_Q8M959	UniRef100_Q8M979	UniRef100_Q8M983	UniRef100_Q8M9A8	UniRef100_Q8M9B0	UniRef100_Q8M9B5	UniRef100_Q8M9D7	UniRef100_Q8M9D9	UniRef100_Q8M9F4	UniRef100_Q8M9I1	UniRef100_Q8M9M9	UniRef100_Q8M9N1	UniRef100_Q8M9N3
363	UniRef100_Q8J0C0	2	Histone H4 (Fragment)	Glomerellaceae	7 kDa	0.93	0.16	1	UniRef100_Q8J1V8
364	UniRef100_C3X6U1	1	Predicted protein	Oxalobacter formigenes HOxBLS	19 kDa	0.92	0.058	1
365	UniRef100_B8EI95	1	Glyceraldehyde-3-phosphate dehydrogenase, type I	Methylocella silvestris BL2	36 kDa	1	0.087	2
366	UniRef100_A1C5D0	47	Proteasome subunit alpha type	Aspergillus clavatus	30 kDa	0.92	0.04	1	UniRef100_A1D0A0	UniRef100_A2QEE5	UniRef100_A3M057	UniRef100_A4R8H8	UniRef100_A5DCF6	UniRef100_A5E120	UniRef100_A6QSJ1	UniRef100_A6RRK3	UniRef100_A7EQV0	UniRef100_A7TFX5	UniRef100_A8NG38	UniRef100_B0D3V9	UniRef100_B2AXB2	UniRef100_B2WHR2	UniRef100_B6K6H4	UniRef100_B6QF85	UniRef100_B8MBE7	UniRef100_B8NR05	UniRef100_B9WLQ4	UniRef100_C0NT66	UniRef100_C0RY21	UniRef100_C1G6D0	UniRef100_C1HA73	UniRef100_C4JMC9	UniRef100_C4YLS1	UniRef100_C5DZG1	UniRef100_C5FIX5	UniRef100_C5GIN2	UniRef100_C5P4E4	UniRef100_C7YR22	UniRef100_C9SCA6	UniRef100_P40303	UniRef100_Q0CAW4	UniRef100_Q0UAT5	UniRef100_Q2H6J7	UniRef100_Q2UAR6	UniRef100_Q4P356	UniRef100_Q5AUH6	UniRef100_Q5KIV1	UniRef100_Q6BLF3	UniRef100_Q6CEN6
367	UniRef100_Q9UXV3	1	Predicted ATPase of the PP-loop superfamily	Pyrococcus abyssi	32 kDa	0.93	0.036	1
368	UniRef100_UPI0001AF40C7		OprF	Pseudomonas syringae pv. oryzae str. 1_6	37 kDa	0.99	0.038	1
369	UniRef100_UPI0001662ABB		PREDICTED: similar to actin alpha 1 skeletal muscle protein	Homo sapiens	51 kDa	0.93	0.024	1	UniRef100_UPI0001A5EAC9
370	UniRef100_Q9FRW7	1	Aspartic proteinase 3	Nepenthes alata	55 kDa	0.92	0.02	1
371	UniRef100_A9BMM5	1	Membrane-associated zinc metalloprotease	Delftia acidovorans SPH-1	50 kDa	0.92	0.022	1
372	UniRef100_B2VU09	1	Aldehyde dehydrogenase	Pyrenophora tritici-repentis Pt-1C-BFP	54 kDa	1	0.028	1
373	UniRef100_Q59IV3	1	Putative mitochondrial dicarboxylate transporter	Mesembryanthemum crystallinum	34 kDa	0.98	0.038	1
374	UniRef100_P0C0Y5	2	Probable NADP-dependent mannitol dehydrogenase	Davidiella tassiana	28 kDa	0.92	0.041	1	UniRef100_Q96W29
375	UniRef100_A1CPG7	32	Mitogen-activated protein kinase hog1	Aspergillus clavatus	42 kDa	0.93	0.036	2	UniRef100_A1D2C9	UniRef100_A1IVT7	UniRef100_A2QRF6	UniRef100_A4LA77	UniRef100_A7EQI8	UniRef100_A8W7M3	UniRef100_B2ASL9	UniRef100_B6H4Y0	UniRef100_B6QCP6	UniRef100_B6QCP7	UniRef100_B8M2C2	UniRef100_C7Z4R4	UniRef100_P0C431	UniRef100_Q0D0P5	UniRef100_Q0U4L8	UniRef100_Q1KTF2	UniRef100_Q2H332	UniRef100_Q2WFL5	UniRef100_Q2WGK3	UniRef100_Q4W6D3	UniRef100_Q4WSF6	UniRef100_Q52PH6	UniRef100_Q5H7P1	UniRef100_Q6PWX2	UniRef100_Q75Q66	UniRef100_Q875L0	UniRef100_Q8NJT7	UniRef100_Q8TGA9	UniRef100_Q96TL5	UniRef100_Q9P419	UniRef100_Q9UV51
376	UniRef100_Q2HTU3	1	Ubiquitin	Medicago truncatula	60 kDa	0.92	0.033	1
377	UniRef100_P46281	5	Carbonic anhydrase	Flaveria pringlei	35 kDa	0.92	0.055	2	UniRef100_P46510	UniRef100_P46511	UniRef100_P46512	UniRef100_Q9XQB0
378	UniRef100_B6SZT9	3	Chlorophyll a-b binding protein	Zea mays	28 kDa	0.92	0.054	1	UniRef100_B6T1H1	UniRef100_Q41823
379	UniRef100_D1IVU2	1	Whole genome shotgun sequence of line PN40024, scaffold_44.assembly12x (Fragment)	Vitis vinifera	51 kDa	0.92	0.028	2
380	UniRef100_B2W0U7	2	NADP-specific glutamate dehydrogenase	Pyrenophora tritici-repentis Pt-1C-BFP	49 kDa	1	0.06	2	UniRef100_Q2LC62
381	UniRef100_A3WF44	6	60 kDa chaperonin	Erythrobacter sp. NAP1	58 kDa	0.93	0.036	1	UniRef100_A5VBQ6	UniRef100_Q1GVZ9	UniRef100_Q1NAP4	UniRef100_Q2G2Z4	UniRef100_Q2N5R9
382	UniRef100_A1CU27	2	Aldehyde dehydrogenase	Aspergillus clavatus	55 kDa	0.93	0.022	1	UniRef100_Q0CMR4
383	UniRef100_O48906	2	Malate dehydrogenase	Medicago sativa	43 kDa	0.92	0.027	1	UniRef100_O81609
384	UniRef100_A6R6G3	10	Ribosomal protein L7a	Ajellomyces capsulatus NAm1	29 kDa	0.92	0.042	1	UniRef100_B8N204	UniRef100_C0NHA4	UniRef100_C0S900	UniRef100_C1H2K5	UniRef100_C5GVK1	UniRef100_C5JD38	UniRef100_C6H6L8	UniRef100_Q0CSK4	UniRef100_Q2ULG3
385	UniRef100_B8M0Y3	1	Ribosomal protein L18	Talaromyces stipitatus ATCC 10500	21 kDa	0.92	0.06	1
386	UniRef100_Q56YA5	1	Serine--glyoxylate aminotransferase	Arabidopsis thaliana	44 kDa	0.92	0.037	1
387	UniRef100_UPI0000D9D9E3		PREDICTED: similar to eukaryotic translation elongation factor 1 alpha 1 isoform 4	Macaca mulatta	50 kDa	0.92	0.035	1	UniRef100_UPI0000D9D9E5
388	UniRef100_Q6YLP7	1	Ribulose bisphosphate carboxylase large chain (Fragment)	Pogonatum pensilvanicum	29 kDa	0.92	0.068	1
389	UniRef100_C0NYC6	4	Hsp70-like protein	Ajellomyces capsulatus G186AR	71 kDa	0.92	0.017	1	UniRef100_C4JPP7	UniRef100_C5P2L6	UniRef100_Q00043
390	UniRef100_A1CXP1	3	5-methyltetrahydropteroyltriglutamate--homocysteine S-methyltransferase	Neosartorya fischeri NRRL 181	87 kDa	0.91	0.013	1	UniRef100_B0Y5S8	UniRef100_C8V8J7
391	UniRef100_Q5UF97	1	Ribulose bisphosphate carboxylase large chain (Fragment)	Cremastosperma bullatum	51 kDa	0.91	0.022	1
392	UniRef100_A5CRH9	2	Glutamine synthetase I	Clavibacter michiganensis subsp. michiganensis NCPPB 382	53 kDa	1	0.059	2	UniRef100_B0RC01
393	UniRef100_A9PFJ5	6	Putative uncharacterized protein	Populus trichocarpa	46 kDa	0.93	0.043	1	UniRef100_B9N052	UniRef100_B9RLN1	UniRef100_C6TFB1	UniRef100_Q5PYQ3	UniRef100_Q9SD81
394	UniRef100_O50002	1	Cysteine protease	Prunus armeniaca	39 kDa	0.92	0.039	1
395	UniRef100_A9PF62	5	Putative uncharacterized protein	Populus trichocarpa	68 kDa	0.93	0.016	1	UniRef100_B9IPS3	UniRef100_Q10CU3	UniRef100_Q10CU4	UniRef100_Q9XE93
396	UniRef100_C6TH54	1	Putative uncharacterized protein	Glycine max	34 kDa	0.92	0.055	1
397	UniRef100_A6WXW9	3	ATP synthase subunit alpha	Ochrobactrum anthropi ATCC 49188	55 kDa	0.92	0.031	1	UniRef100_C8SUC9	UniRef100_Q98EV6
398	UniRef100_C6SY14	1	Putative uncharacterized protein	Glycine max	11 kDa	0.92	0.13	1
399	UniRef100_C7PRE9	1	OmpA/MotB domain protein	Chitinophaga pinensis DSM 2588	55 kDa	0.92	0.018	1
400	UniRef100_Q9FXV2	2	Legumin (Fragment)	Quercus acutissima	14 kDa	0.92	0.12	1	UniRef100_Q9FXV3
401	UniRef100_A8IEU1	1	Putative outer membrane protein, putative porin	Azorhizobium caulinodans ORS 571	51 kDa	0.93	0.019	1
402	UniRef100_C6SZM2	1	Photosystem II reaction center psb28 protein	Glycine max	20 kDa	0.92	0.089	1
403	UniRef100_C7YSV9	2	Predicted protein	Nectria haematococca mpVI 77-13-4	57 kDa	0.92	0.025	1	UniRef100_UPI000023CF6B
404	UniRef100_C3BXX4	1	Putative uncharacterized protein	Bacillus thuringiensis serovar tochigiensis BGSC 4Y1	36 kDa	0.93	0.049	1
405	UniRef100_A1D6N2	9	Oxidoreductase, zinc-binding	Neosartorya fischeri NRRL 181	39 kDa	0.92	0.03	1	UniRef100_A4RFX0	UniRef100_B0XX95	UniRef100_B2AUZ9	UniRef100_C7Z7N9	UniRef100_C9SDL6	UniRef100_Q2GRI7	UniRef100_Q2H802	UniRef100_UPI000023EA6B
406	UniRef100_A1CBQ2	5	Agmatinase, putative	Aspergillus clavatus	42 kDa	0.92	0.041	1	UniRef100_A2R3Y9	UniRef100_B0Y1U6	UniRef100_C8V2P6	UniRef100_Q0TY20
407	UniRef100_C9S6Q9	1	Outer mitochondrial membrane protein porin	Verticillium albo-atrum VaMs.102	26 kDa	0.92	0.049	1
408	UniRef100_A4RKY3	9	Putative uncharacterized protein	Magnaporthe grisea	45 kDa	0.93	0.022	1	UniRef100_B2B473	UniRef100_B6H735	UniRef100_C7YS01	UniRef100_C9S5S2	UniRef100_Q2HGY4	UniRef100_Q7Z8F2	UniRef100_Q872D8	UniRef100_UPI000023D430
409	2001280060	1	Uncharacterized conserved protein [Soil: Diversa Silage]		11 kDa	0.92	0.13	1
410	UniRef100_B8X9S7	1	Endochitinase (Fragment)	Hypocrea alutacea	30 kDa	0.92	0.036	1
411	UniRef100_Q5XQ46	1	Family 10 xylanase	Cryptovalsa sp. BCC 7197	35 kDa	0.99	0.043	1
412	UniRef100_B9GGE2	1	Predicted protein (Fragment)	Populus trichocarpa	37 kDa	0.99	0.038	1
413	UniRef100_D1IEY2	1	Whole genome shotgun sequence of line PN40024, scaffold_26.assembly12x (Fragment)	Vitis vinifera	21 kDa	0.97	0.074	1
414	UniRef100_B9H3X7	1	Predicted protein (Fragment)	Populus trichocarpa	46 kDa	0.93	0.023	1
415	UniRef100_P06805	3	Elongation factor 1-alpha	Mucor racemosus	50 kDa	0.93	0.037	2	UniRef100_P14864	UniRef100_P14865
416	UniRef100_C0SAL3	4	Putative uncharacterized protein	Paracoccidioides brasiliensis Pb03	16 kDa	0.92	0.086	1	UniRef100_C1GDK6	UniRef100_C1HB19	UniRef100_Q0UTU7
417	UniRef100_A5C314	4	Putative uncharacterized protein	Vitis vinifera	29 kDa	0.92	0.061	1	UniRef100_D1HI78	UniRef100_D1I3A4	UniRef100_UPI00019842E7
418	UniRef100_O81355	1	Isoflavone reductase related protein	Pyrus communis	34 kDa	1	0.088	2
419	UniRef100_A9PF34	10	Aminomethyltransferase	Populus trichocarpa	44 kDa	0.99	0.056	1	UniRef100_A9PL00	UniRef100_A9PL01	UniRef100_B9HZ70	UniRef100_B9NBI6	UniRef100_D1HPY8	UniRef100_O23936	UniRef100_O49849	UniRef100_P49363	UniRef100_UPI00015CE134
420	UniRef100_A2Q3A6	53	Plasma-membrane proton-efflux P-type ATPase	Medicago truncatula	106 kDa	0.99	0.016	1	UniRef100_A5ALY9	UniRef100_A5B4B3	UniRef100_A5C9X8	UniRef100_A8JP99	UniRef100_B3VDR8	UniRef100_B9F9Z8	UniRef100_B9FAP3	UniRef100_B9FNV9	UniRef100_B9GMD1	UniRef100_B9H0B5	UniRef100_B9HCD3	UniRef100_B9I315	UniRef100_B9IEG7	UniRef100_B9ILW8	UniRef100_B9IMI1	UniRef100_B9N321	UniRef100_B9R933	UniRef100_C0Z2R2	UniRef100_C5YT23	UniRef100_C5Z6R9	UniRef100_D1H2Q1	UniRef100_D1H9L2	UniRef100_D1INT3	UniRef100_D1IRB3	UniRef100_D1IRT7	UniRef100_O22613	UniRef100_P19456	UniRef100_P20431	UniRef100_P20649	UniRef100_Q03194	UniRef100_Q0DJ73	UniRef100_Q10T57	UniRef100_Q1A4H1	UniRef100_Q43001	UniRef100_Q43128	UniRef100_Q43131	UniRef100_Q43271	UniRef100_Q4VCL9	UniRef100_Q6V914	UniRef100_Q7Y066	UniRef100_Q7Y067
421	UniRef100_B0U2E9	4	Outer membrane protein P6	Xylella fastidiosa	20 kDa	0.92	0.051	1	UniRef100_B2I4T7	UniRef100_Q87CZ4	UniRef100_Q9PC85
422	UniRef100_A2I7W3	1	Pectate lyase (Fragment)	Penicillium citrinum	31 kDa	0.97	0.034	1
423	UniRef100_B0CQ43	1	Elongation factor 1-alpha	Laccaria bicolor S238N-H82	50 kDa	1	0.087	3
424	UniRef100_B6HRM9	1	Pc22g24890 protein	Penicillium chrysogenum Wisconsin 54-1255	34 kDa	0.93	0.043	1
425	UniRef100_A3LQD6	1	Enolase	Pichia stipitis	47 kDa	0.93	0.039	1
426	UniRef100_A4ALR8	1	Glutamine synthetase	marine actinobacterium PHSC20C1	54 kDa	0.93	0.038	1
427	UniRef100_C7PK45	1	Histone family protein DNA-binding protein	Chitinophaga pinensis DSM 2588	9 kDa	0.92	0.13	1
428	UniRef100_A1C7Y5	23	Cyanate hydratase, putative	Aspergillus clavatus	17 kDa	0.92	0.084	1	UniRef100_A1DIL2	UniRef100_A2R692	UniRef100_A6R853	UniRef100_A6S6V7	UniRef100_A7F1L5	UniRef100_B0XV83	UniRef100_B6HIM5	UniRef100_B8MQZ4	UniRef100_B8NQ08	UniRef100_C0NWE3	UniRef100_C4JUN6	UniRef100_C5G6H8	UniRef100_C5PDS9	UniRef100_C6HBW5	UniRef100_C7YTF5	UniRef100_C8VCM2	UniRef100_Q0CVK8	UniRef100_Q2UAX9	UniRef100_Q4WZL3	UniRef100_Q5AWJ9	UniRef100_UPI000023D83F	UniRef100_UPI0000D88387
429	UniRef100_B9RNW8	2	NADP-dependent glyceraldehyde-3-phosphate dehydrogenase, putative	Ricinus communis	53 kDa	0.93	0.03	1	UniRef100_Q1WIQ6
430	UniRef100_C7DUZ4	10	Subtilisin-like serine protease PR1H (Fragment)	Metarhizium majus	54 kDa	0.93	0.025	1	UniRef100_C7DUZ5	UniRef100_C7DUZ6	UniRef100_C7DUZ7	UniRef100_C7DUZ8	UniRef100_C7DV00	UniRef100_Q8X0Y8	UniRef100_Q96UF6	UniRef100_Q9UUR3	UniRef100_Q9UUR9
431	UniRef100_A1C6F9	10	Secretory pathway gdp dissociation inhibitor	Aspergillus clavatus	52 kDa	1	0.064	2	UniRef100_A1DH32	UniRef100_A2QCC8	UniRef100_B0XSE6	UniRef100_B2WMG9	UniRef100_B6H6L0	UniRef100_B8NFX0	UniRef100_Q0CXX2	UniRef100_Q0U6J7	UniRef100_Q3MSV2
432	UniRef100_Q5DT20	2	Hornerin	Homo sapiens	282 kDa	0.99	0.0067	1	UniRef100_Q86YZ3
433	UniRef100_UPI00001D0817	1	PREDICTED: similar to Bromodomain adjacent to zinc finger domain protein 1B (Williams-Beuren syndrome chromosome region 9 protein homolog) (WBRS9)	Rattus norvegicus	170 kDa	0.91	0.0061	1
434	UniRef100_Q58YD9	1	Gamma-actin	Blakeslea trispora	42 kDa	0.99	0.043	1
435	UniRef100_C6W5G4	1	Diaminopimelate decarboxylase	Dyadobacter fermentans DSM 18053	46 kDa	0.91	0.022	1
436	UniRef100_A6SAE6	2	Elongation factor 1-alpha	Botryotinia fuckeliana B05.10	50 kDa	0.92	0.033	1	UniRef100_A7EJM6
437	UniRef100_B9HAQ4	1	Predicted protein	Populus trichocarpa	40 kDa	0.93	0.03	1
438	UniRef100_C7YYH5	1	Adenosylhomocysteinase	Nectria haematococca mpVI 77-13-4	49 kDa	0.92	0.024	1
439	UniRef100_P34825	1	Elongation factor 1-alpha	Hypocrea jecorina	50 kDa	0.92	0.022	1
440	UniRef100_A5AL61	3	Putative uncharacterized protein	Vitis vinifera	58 kDa	0.92	0.021	1	UniRef100_B9S4G8	UniRef100_D1HW15
441	UniRef100_A3GGD9	4	Malate dehydrogenase	Pichia stipitis	35 kDa	0.93	0.036	1	UniRef100_B9WFP0	UniRef100_C4Y802	UniRef100_Q5AMP4
442	UniRef100_Q8H1T3	1	Ferritin-2, chloroplastic	Nicotiana tabacum	29 kDa	0.92	0.039	1
443	UniRef100_B2WMR5	4	Leucine aminopeptidase 2	Pyrenophora tritici-repentis Pt-1C-BFP	43 kDa	0.93	0.033	1	UniRef100_C7Z6W1	UniRef100_Q0U6L1	UniRef100_UPI000023E9EC
444	UniRef100_B3TLV1	1	Thioredoxin peroxidase	Elaeis guineensis	32 kDa	0.92	0.087	1
445	UniRef100_C9SBG2	1	Woronin body major protein	Verticillium albo-atrum VaMs.102	15 kDa	0.92	0.084	1
446	UniRef100_C5TFQ8	3	OmpA/MotB domain protein	Zymomonas mobilis subsp. mobilis ATCC 10988	38 kDa	0.93	0.033	1	UniRef100_C8WF71	UniRef100_Q5NMT2
447	UniRef100_B2AVK3	2	Predicted CDS Pa_7_2650	Podospora anserina	88 kDa	0.93	0.015	1	UniRef100_Q7RXM0
448	UniRef100_Q9SU63	1	Aldehyde dehydrogenase family 2 member B4, mitochondrial	Arabidopsis thaliana	59 kDa	0.92	0.033	2
449	UniRef100_B9RY20	1	Zinc metalloprotease, putative	Ricinus communis	87 kDa	0.93	0.016	1
450	UniRef100_A1CYB8	1	Pectate lyase, putative	Neosartorya fischeri NRRL 181	34 kDa	0.93	0.059	1
451	UniRef100_A5AMY6	3	Putative uncharacterized protein	Vitis vinifera	59 kDa	0.92	0.021	1	UniRef100_B9R726	UniRef100_UPI000198535D
452	UniRef100_P15252	2	Rubber elongation factor protein	Hevea brasiliensis	15 kDa	0.93	0.08	1
453	UniRef100_Q0U9U5	1	Putative uncharacterized protein	Phaeosphaeria nodorum	24 kDa	0.92	0.083	1
454	UniRef100_Q0UVU7	1	Putative uncharacterized protein	Phaeosphaeria nodorum	52 kDa	0.93	0.029	1
455	UniRef100_A7SZW8	1	Predicted protein	Nematostella vectensis	75 kDa	0.93	0.012	1
456	UniRef100_B2FQM8	1	Putative outer membrane protein	Stenotrophomonas maltophilia K279a	39 kDa	0.98	0.077	1
457	UniRef100_Q9GT29	1	Malate dehydrogenase	Phytomonas sp. isolate Ech1	34 kDa	0.93	0.037	1
458	UniRef100_A1USC1	25	Elongation factor Tu 1	Bartonella bacilliformis KC583	43 kDa	0.92	0.041	1	UniRef100_A1USL2	UniRef100_A3WVS0	UniRef100_A5ELM9	UniRef100_A6X0A2	UniRef100_A9ISD9	UniRef100_B0CH34	UniRef100_B2IEH3	UniRef100_B6JET1	UniRef100_C4IRV1	UniRef100_C4WKC8	UniRef100_C4WKE2	UniRef100_C6ACT4	UniRef100_C6AUY0	UniRef100_Q11HA6	UniRef100_Q1MIE3	UniRef100_Q1QN32	UniRef100_Q2K9L8	UniRef100_Q2K9N2	UniRef100_Q2YM08	UniRef100_Q3SSW8	UniRef100_Q6FZC0	UniRef100_Q6FZL2	UniRef100_Q89J82	UniRef100_Q8KHX9
459	UniRef100_Q20BN1	1	Cytochrome b6-f complex iron-sulfur subunit	Panax ginseng	20 kDa	0.91	0.076	1
460	UniRef100_A6R2Y5	19	Elongation factor 3	Ajellomyces capsulatus NAm1	118 kDa	0.93	0.011	1	UniRef100_A6SS09	UniRef100_A7F8A2	UniRef100_B2W3H5	UniRef100_B6QJR0	UniRef100_B8MIV4	UniRef100_C0NA24	UniRef100_C1GND5	UniRef100_C4JX77	UniRef100_C5FN09	UniRef100_C5GDP8	UniRef100_C5JSQ0	UniRef100_C5PC43	UniRef100_C6HKD8	UniRef100_C7Z8K5	UniRef100_Q2GZS2	UniRef100_Q7S9Z6	UniRef100_UPI000023D6A3	UniRef100_UPI0000D873EF
461	UniRef100_B2AT16	6	Predicted CDS Pa_1_14360	Podospora anserina	22 kDa	0.91	0.07	1	UniRef100_C7YMI0	UniRef100_C9SC59	UniRef100_Q2H4Z2	UniRef100_Q4I2J8	UniRef100_Q7SI17
462	UniRef100_O22462	5	Barperm1 (Fragment)	Hordeum vulgare	22 kDa	0.92	0.049	1	UniRef100_O23997	UniRef100_Q8S4P7	UniRef100_Q946Y9	UniRef100_Q946Z0
463	UniRef100_Q121L2	1	tRNA modification GTPase mnmE	Polaromonas sp. JS666	51 kDa	0.92	0.019	1
464	UniRef100_A5BKL4	11	Putative uncharacterized protein	Vitis vinifera	40 kDa	0.92	0.027	1	UniRef100_A9PG43	UniRef100_B9HGG5	UniRef100_B9N8P0	UniRef100_B9N8R1	UniRef100_B9N8R5	UniRef100_B9NDW7	UniRef100_B9SUZ3	UniRef100_B9SUZ4	UniRef100_C0LNV1	UniRef100_D1HUA6
465	UniRef100_A8PUT8	1	Putative uncharacterized protein	Brugia malayi	128 kDa	0.92	0.0091	1
466	UniRef100_A8WKW7	1	Putative uncharacterized protein	root	40 kDa	0.91	0.03	1
467	UniRef100_A8NLP8	1	Putative uncharacterized protein	Coprinopsis cinerea okayama7#130	37 kDa	1	0.076	2
468	UniRef100_A9PL02	3	Mitochondrial glycine decarboxylase complex P-protein	Populus tremuloides	115 kDa	0.98	0.01	1	UniRef100_B9HDN2	UniRef100_B9RRS7
469	UniRef100_UPI0000DA2F64		PREDICTED: similar to thrombospondin repeat containing 1	Rattus norvegicus	69 kDa	0.92	0.011	1	UniRef100_UPI0000DA3082	UniRef100_UPI0001B7AA70
470	UniRef100_C6T8W8	1	Putative uncharacterized protein	Glycine max	28 kDa	1	0.049	2
471	UniRef100_O82660	1	Photosystem II stability/assembly factor HCF136, chloroplastic	Arabidopsis thaliana	44 kDa	0.99	0.04	1
472	UniRef100_C6EVF9	3	Elongation factor 1-alpha	Glycine max	49 kDa	0.92	0.027	1	UniRef100_P25698	UniRef100_Q84RU1
473	UniRef100_B5LRC4	5	Superoxide dismutase [Cu-Zn] (Fragment)	Vicia faba	3 kDa	0.92	0.82	1	UniRef100_B7FHQ5	UniRef100_B7FK04	UniRef100_O65198	UniRef100_Q6T624
474	UniRef100_C6TAV0	4	Putative uncharacterized protein	Glycine max	21 kDa	0.92	0.043	1	UniRef100_C7S8C2	UniRef100_C7S8C4	UniRef100_Q9AR81
475	UniRef100_A1CNN8	11	40S ribosomal protein S22	Trichocomaceae	15 kDa	0.91	0.14	1	UniRef100_A2QB69	UniRef100_B2WKJ4	UniRef100_C0SED0	UniRef100_C4JI99	UniRef100_C5FBG8	UniRef100_C5GMF9	UniRef100_C5JY66	UniRef100_C5P887	UniRef100_C8VUR5	UniRef100_Q0CM63
476	UniRef100_Q0UJY8	1	Putative uncharacterized protein	Phaeosphaeria nodorum	54 kDa	0.93	0.03	1
477	UniRef100_C7Z218	1	Putative uncharacterized protein	Nectria haematococca mpVI 77-13-4	16 kDa	0.92	0.072	1
478	UniRef100_Q1QMA7	2	Type I secretion outer membrane protein, TolC	Nitrobacter hamburgensis X14	52 kDa	0.93	0.025	1	UniRef100_Q89LS0
479	UniRef100_Q9FF05	1	Osmotin-like protein (Fragment)	Fagus sylvatica	14 kDa	0.92	0.1	1
480	UniRef100_B9SJY9	1	Fructose-bisphosphate aldolase	Ricinus communis	43 kDa	0.92	0.071	1
481	UniRef100_C7ZD60	1	Predicted protein	Nectria haematococca mpVI 77-13-4	25 kDa	0.92	0.053	1
482	UniRef100_B2LML8	5	ATP-dependent Clp protease proteolytic subunit	Guizotia abyssinica	22 kDa	0.92	0.077	1	UniRef100_Q1KXT4	UniRef100_Q2PMR0	UniRef100_Q332V2	UniRef100_Q9BBQ9
483	UniRef100_Q9M1B9	1	Probable fructokinase-4	Arabidopsis thaliana	35 kDa	0.92	0.046	1
484	UniRef100_B4S112	5	60 kDa chaperonin	Alteromonas macleodii 'Deep ecotype'	57 kDa	0.92	0.031	1	UniRef100_P59526	UniRef100_Q058F3	UniRef100_Q8KIX3	UniRef100_UPI0001AEBB56
485	UniRef100_A5AY42	2	Putative uncharacterized protein	Vitis vinifera	20 kDa	0.93	0.071	1	UniRef100_D1IE51
486	UniRef100_A2WPC2	19	Putative uncharacterized protein	Oryza sativa Indica Group	48 kDa	0.92	0.024	1	UniRef100_A5BDU8	UniRef100_A9PJ55	UniRef100_A9PL03	UniRef100_B5LAT6	UniRef100_B8AYE1	UniRef100_B9FML1	UniRef100_B9HIJ5	UniRef100_B9RZW7	UniRef100_C4J5G3	UniRef100_C5XIY9	UniRef100_C5Z0N4	UniRef100_Q5K5B2	UniRef100_Q6QJL7	UniRef100_Q8GT30	UniRef100_Q93WQ1	UniRef100_Q9ASP4	UniRef100_Q9FEN7	UniRef100_UPI00015C7506
487	UniRef100_B6U4F7	2	Acylamino-acid-releasing enzyme	Zea mays	85 kDa	0.93	0.014	1	UniRef100_Q0IXP9
488	2001351427	10	Glucose dehydrogenase [Soil: Diversa Silage]		38 kDa	0.92	0.032	1	UniRef100_A1AXZ3	UniRef100_B0UBE9	UniRef100_B1LTI1	UniRef100_B8IC75	UniRef100_C6QD91	UniRef100_C6QDU8	UniRef100_C6QGC1	UniRef100_C6QJH2	UniRef100_P29968
489	UniRef100_Q6C2B5	1	Nucleoside diphosphate kinase	Yarrowia lipolytica	17 kDa	0.92	0.11	1
490	UniRef100_A3LPD9	8	Heat shock protein 90 homolog	Pichia stipitis	81 kDa	0.91	0.017	1	UniRef100_A5DN19	UniRef100_A5E677	UniRef100_B9WK86	UniRef100_C5MG15	UniRef100_P46598	UniRef100_Q6BSA2	UniRef100_Q9P8I3
491	UniRef100_B3PKS5	1	Cip2	Cellvibrio japonicus Ueda107	50 kDa	0.92	0.038	1
492	UniRef100_Q9NAX9	1	Heat shock 70 protein	Parastrongyloides trichosuri	70 kDa	0.92	0.02	1
493	UniRef100_Q67BD2	2	Heat shock protein 70-1	Nicotiana tabacum	71 kDa	0.92	0.02	1	UniRef100_UPI000023E317
494	UniRef100_B6JIX0	3	60 kDa chaperonin	Oligotropha carboxidovorans OM5	58 kDa	0.93	0.031	1	UniRef100_B9J9Y9	UniRef100_Q1QIL6
495	UniRef100_C7PFX3	1	TonB-dependent receptor plug	Chitinophaga pinensis DSM 2588	117 kDa	0.98	0.017	1
496	UniRef100_B0DAU2	4	Histone H2B	Laccaria bicolor S238N-H82	16 kDa	0.99	0.1	1	UniRef100_B0DBJ7	UniRef100_P78567	UniRef100_UPI000187E663
497	UniRef100_B9GT56	2	Predicted protein	Populus trichocarpa	11 kDa	1	0.18	2	UniRef100_C6T219
498	UniRef100_Q7RWP2	1	Beta-glucosidase 1	Neurospora crassa	96 kDa	0.91	0.01	1
499	UniRef100_Q3SA38	1	Putative glyceraldehyde 3-phosphate dehydrogenase (Fragment)	Fagus sylvatica	13 kDa	0.91	0.088	1
500	UniRef100_B7FMC9	6	Proteasome subunit alpha type	Medicago truncatula	27 kDa	0.91	0.057	1	UniRef100_B9RR89	UniRef100_B9T3A4	UniRef100_C6TNX9	UniRef100_O48551	UniRef100_Q9XG77
501	UniRef100_A9H699	2	General secretion pathway protein D	Gluconacetobacter diazotrophicus PAl 5	80 kDa	0.92	0.01	1	UniRef100_Q8KZ81
502	UniRef100_C6T9U4	2	Putative uncharacterized protein	Glycine max	33 kDa	0.92	0.041	1	UniRef100_C6TJY6
503	UniRef100_Q8VXN6	1	Glyceraldehyde-3-phosphate dehydrogenase (Fragment)	Coleochaete scutata	34 kDa	0.91	0.054	1
504	UniRef100_B0RR14	6	TonB-dependent outer membrane receptor	Xanthomonas campestris pv. campestris str. B100	111 kDa	0.93	0.011	1	UniRef100_B2SWG3	UniRef100_Q2P0N9	UniRef100_Q5GXJ7	UniRef100_Q8PIX2	UniRef100_UPI0001692FFA
505	UniRef100_B4LKF1	1	GJ21609	Drosophila virilis	107 kDa	0.9	0.016	1
506	UniRef100_Q2HPG3	1	Osmotin-like protein I	Gossypium hirsutum	27 kDa	0.92	0.041	1
507	UniRef100_A6RTG6	2	Putative uncharacterized protein	Botryotinia fuckeliana B05.10	49 kDa	0.92	0.022	1	UniRef100_Q873I6
508	UniRef100_B7FKU7	1	Cysteine synthase	Medicago truncatula	34 kDa	0.92	0.037	1
509	UniRef100_B8IP19	1	Septum site-determining protein MinC	Methylobacterium nodulans ORS 2060	28 kDa	0.93	0.042	1
510	UniRef100_A6S819	11	Citrate synthase	Botryotinia fuckeliana B05.10	60 kDa	0.92	0.022	1	UniRef100_A7EHV7	UniRef100_B2ANA5	UniRef100_B2W6A4	UniRef100_C7C436	UniRef100_C9S9X8	UniRef100_Q0MSG5	UniRef100_Q0UKM4	UniRef100_Q2KGJ7	UniRef100_Q7SG82	UniRef100_UPI000023F16E
511	UniRef100_C7YIL7	1	Putative uncharacterized protein	Nectria haematococca mpVI 77-13-4	38 kDa	0.98	0.038	1
512	UniRef100_P17614	1	ATP synthase subunit beta, mitochondrial	Nicotiana plumbaginifolia	60 kDa	0.91	0.029	1
513	UniRef100_P83372	1	Citrate synthase, mitochondrial	Fragaria x ananassa	52 kDa	0.93	0.026	1
514	UniRef100_UPI00017961F5		PREDICTED: similar to guanylate binding protein 4	Equus caballus	80 kDa	0.92	0.013	1
515	UniRef100_Q0PPW7	1	Elongation factor 1-alpha (Fragment)	Mycoblastus sanguinarius	44 kDa	0.93	0.042	1
516	UniRef100_A6RKE1	1	Putative uncharacterized protein	Botryotinia fuckeliana B05.10	34 kDa	0.92	0.027	1
517	UniRef100_A1D3N7	2	Molecular chaperone Hsp70	Neosartorya fischeri NRRL 181	70 kDa	0.98	0.025	1	UniRef100_B0XPW1
518	UniRef100_A5B109	24	Putative uncharacterized protein	Vitis vinifera	42 kDa	0.92	0.027	1	UniRef100_B4FQX1	UniRef100_B4G039	UniRef100_B8B8B1	UniRef100_B9RLK7	UniRef100_C5WT90	UniRef100_D1H170	UniRef100_D1H2U9	UniRef100_O22427	UniRef100_O22666	UniRef100_O24547	UniRef100_P80607	UniRef100_Q38M71	UniRef100_Q5ZF83	UniRef100_Q6IV07	UniRef100_Q6Z4G3	UniRef100_Q8GWR6	UniRef100_Q8LB19	UniRef100_Q8RU27	UniRef100_Q9LFW1	UniRef100_Q9LUE6	UniRef100_Q9SC19	UniRef100_Q9SRT9	UniRef100_UPI00015CC09B
519	UniRef100_C7Z7S4	3	Predicted protein	Nectria haematococca mpVI 77-13-4	23 kDa	0.91	0.059	1	UniRef100_Q2H803	cont2O00725
520	UniRef100_A8B3L3	1	O-acetylhomoserine sulfhydrylase (Fragment)	Epichloe festucae	42 kDa	0.98	0.03	1
521	UniRef100_A6SEW8	4	Putative uncharacterized protein	Botryotinia fuckeliana B05.10	34 kDa	0.92	0.056	1	UniRef100_Q0C7F5	UniRef100_Q6QF60	UniRef100_Q7Z9N0
522	UniRef100_B2ADM5	1	Predicted CDS Pa_4_1490	Podospora anserina	25 kDa	0.99	0.041	1
523	UniRef100_A6SBH0	2	Putative uncharacterized protein	Botryotinia fuckeliana B05.10	95 kDa	0.98	0.017	1	UniRef100_A7EP97
524	UniRef100_C9SA50	1	Putative uncharacterized protein	Verticillium albo-atrum VaMs.102	28 kDa	0.93	0.047	1
525	UniRef100_B2ARD9	2	Predicted CDS Pa_4_7820	Podospora anserina	91 kDa	0.93	0.018	1	UniRef100_Q7Z9M8
526	UniRef100_A3HTJ7	3	Xylose isomerase	Algoriphagus sp. PR1	49 kDa	0.93	0.03	1	UniRef100_C7PB53	UniRef100_UPI0000E11044
527	UniRef100_Q9X4R9	1	OprF	Pseudomonas cichorii	37 kDa	0.93	0.061	1
528	UniRef100_Q1P9U3	1	ATP synthase subunit 9, mitochondrial	Camellia sinensis	9 kDa	0.92	0.36	1
529	UniRef100_A4RGY5	10	Vacuolar ATP synthase catalytic subunit A	Magnaporthe grisea	63 kDa	0.93	0.027	1	UniRef100_A7EEP7	UniRef100_B2B5Y3	UniRef100_B2WLL8	UniRef100_C7YU97	UniRef100_C9SFS8	UniRef100_P11592	UniRef100_Q0UB43	UniRef100_Q2GWF4	UniRef100_UPI000023D291
530	UniRef100_A9PFJ3	4	Predicted protein	Populus trichocarpa	29 kDa	0.93	0.048	1	UniRef100_B9H4D0	UniRef100_B9MXM5	UniRef100_B9R7W9
531	UniRef100_B6TI56	2	Putative uncharacterized protein	Zea mays	29 kDa	0.92	0.047	1	UniRef100_C6TEW9
532	UniRef100_Q2EKD7	1	Polyprotein	Papaya ringspot virus	381 kDa	0.92	0.0045	1
533	UniRef100_Q7X9C3	1	Aspartic protease (Fragment)	Pyrus pyrifolia	21 kDa	0.93	0.11	1
534	UniRef100_A6S494	2	Malate dehydrogenase	Botryotinia fuckeliana B05.10	36 kDa	0.93	0.035	1	UniRef100_A7F894
535	UniRef100_B2VZE9	3	Enolase	Pyrenophora tritici-repentis Pt-1C-BFP	47 kDa	0.92	0.034	1	UniRef100_Q0UXE3	UniRef100_Q9HDT3
536	UniRef100_B0T2C8	3	30S ribosomal protein S3	Caulobacter sp. K31	28 kDa	0.92	0.056	1	UniRef100_B8H4E0	UniRef100_D0XVV6
537	UniRef100_A1CTV7	27	ATP citrate lyase subunit (Acl), putatibe	Aspergillus clavatus	53 kDa	0.92	0.039	1	UniRef100_A1DNC3	UniRef100_A5ABI8	UniRef100_A6R5M5	UniRef100_A7EAP6	UniRef100_B0Y8A9	UniRef100_B2B149	UniRef100_B2VT67	UniRef100_B6HKP1	UniRef100_B6Q7P0	UniRef100_B8MQ81	UniRef100_C0NRR1	UniRef100_C0SA90	UniRef100_C1GBJ3	UniRef100_C1H308	UniRef100_C5GQT5	UniRef100_C5JZE1	UniRef100_C6H5N0	UniRef100_C7YPU4	UniRef100_C8VP01	UniRef100_C9SKJ6	UniRef100_Q2GNM9	UniRef100_Q4WM98	UniRef100_Q8X096	UniRef100_Q9P8D3	UniRef100_Q9P8F3	UniRef100_UPI000023EA40
538	2001242536	1	ABC-type multidrug transport system, ATPase and permease components [Soil: Diversa Silage]		38 kDa	0.91	0.038	1
539	UniRef100_Q5LQF2	1	Acyl-CoA dehydrogenase famiy protein	Ruegeria pomeroyi	45 kDa	0.92	0.029	1
540	UniRef100_B1VLB7	9	Putative TerD-family protein	Streptomyces griseus subsp. griseus NBRC 13350	20 kDa	0.92	0.063	1	UniRef100_C9ZHS9	UniRef100_D0L8C1	UniRef100_Q82BA2	UniRef100_UPI0001AEEA96	UniRef100_UPI0001AF08D3	UniRef100_UPI0001AF1170	UniRef100_UPI0001AF203C	UniRef100_UPI0001B5423F
541	UniRef100_Q7XBP8	1	Ubiquitin/actin fusion protein 2	Bigelowiella natans	51 kDa	0.92	0.039	1
542	UniRef100_UPI0001AEE432		streptogrisin A precursor	Streptomyces albus J1074	29 kDa	0.92	0.034	1
543	UniRef100_D0KXQ9	1	Polypeptide-transport-associated domain protein ShlB-type	Halothiobacillus neapolitanus c2	65 kDa	0.92	0.015	1
544	UniRef100_Q0V7G4	1	Putative uncharacterized protein	Phaeosphaeria nodorum	24 kDa	0.92	0.062	1
545	UniRef100_A8NZY9	1	Putative uncharacterized protein	Coprinopsis cinerea okayama7#130	32 kDa	0.91	0.032	1
546	UniRef100_A0N0G9	21	Beta-tubulin	Blastocladiella emersonii	50 kDa	0.91	0.033	1	UniRef100_B8X8Q5	UniRef100_Q29TH8	UniRef100_Q29TH9	UniRef100_Q29TI0	UniRef100_Q29TI1	UniRef100_Q29TI7	UniRef100_Q65A96	UniRef100_Q7Z861	UniRef100_Q7Z8C5	UniRef100_Q7Z8N3	UniRef100_Q86ZW9	UniRef100_Q86ZX0	UniRef100_Q86ZX1	UniRef100_Q86ZX3	UniRef100_Q9P8Y8	UniRef100_Q9P8Z0	UniRef100_Q9UVR7	UniRef100_Q9UVR8	UniRef100_Q9UVS0	UniRef100_Q9UVS7
547	UniRef100_A1WCN6	2	Elongation factor Tu 2	Acidovorax sp. JS42	43 kDa	0.99	0.04	1	UniRef100_B9MB71
548	UniRef100_C5CPL5	1	Porin Gram-negative type	Variovorax paradoxus S110	41 kDa	0.92	0.026	1
549	UniRef100_A1CT51	22	GDP-mannose pyrophosphorylase A	Aspergillus clavatus	48 kDa	0.91	0.023	1	UniRef100_A1DMG2	UniRef100_A2QVR6	UniRef100_A6S1X0	UniRef100_A7F773	UniRef100_B6GZ79	UniRef100_B6Q596	UniRef100_B8LTK1	UniRef100_C0NI64	UniRef100_C0SII5	UniRef100_C1GMI8	UniRef100_C1HBN3	UniRef100_C4JGY0	UniRef100_C5FCU7	UniRef100_C5GTM3	UniRef100_C5PGT3	UniRef100_C6HD05	UniRef100_C7ZC74	UniRef100_C9SYT9	UniRef100_Q0CK76	UniRef100_Q0UPC8	UniRef100_UPI000023E9EF
550	UniRef100_Q095P1	1	Protein oar	Stigmatella aurantiaca DW4/3-1	112 kDa	0.92	0.011	1
551	UniRef100_A9P8M1	3	Triosephosphate isomerase	Populus trichocarpa	18 kDa	1	0.19	2	UniRef100_A9PE68	UniRef100_B9HTI4
552	UniRef100_Q9XF73	1	Putative chlorophyll a/b-binding protein	Phalaenopsis hybrid cultivar	30 kDa	0.92	0.061	1
553	UniRef100_B9T4X3	3	14 kDa proline-rich protein DC2.15, putative	Ricinus communis	14 kDa	0.92	0.066	1	UniRef100_B9T4X4	UniRef100_B9T4X5
554	UniRef100_C5ES53	1	Putative uncharacterized protein	Clostridiales bacterium 1_7_47FAA	62 kDa	0.92	0.017	1
555	UniRef100_B9HG21	1	Shikimate kinase	Populus trichocarpa	33 kDa	0.93	0.041	1
556	UniRef100_C7SP30	1	ATP synthase subunit beta (Fragment)	Childia trianguliferum	36 kDa	0.92	0.041	1
557	UniRef100_D1H5G3	2	Whole genome shotgun sequence of line PN40024, scaffold_4.assembly12x (Fragment)	Vitis vinifera	86 kDa	0.92	0.014	1	UniRef100_UPI00015C76FA
558	UniRef100_B1PZ38	1	OmpF	Pseudomonas putida	37 kDa	1	0.099	2
559	UniRef100_B8NVH8	1	Pectate lyase, putative	Aspergillus	40 kDa	1	0.032	1
560	UniRef100_A6QX99	18	Cell division control protein 10	Ajellomyces capsulatus NAm1	39 kDa	0.91	0.038	1	UniRef100_A6RTA9	UniRef100_A7EZR3	UniRef100_A7LM54	UniRef100_B2B0K4	UniRef100_B6H763	UniRef100_B6QRE9	UniRef100_B8M793	UniRef100_C0NQN9	UniRef100_C4JTC1	UniRef100_C5FFC5	UniRef100_C5GB76	UniRef100_C5P647	UniRef100_C6HQ74	UniRef100_Q0CCS9	UniRef100_Q8J0C3	UniRef100_Q9HFK9	UniRef100_UPI0000D87AA1
561	UniRef100_A5C7J7	3	Putative uncharacterized protein	Vitis vinifera	22 kDa	0.92	0.078	1	UniRef100_C6GFP4	UniRef100_D1H6B1
562	UniRef100_B8NV82	1	60S ribosomal protein L27a, putative	Aspergillus	17 kDa	0.98	0.11	1
563	UniRef100_Q8WJJ9	1	Ribulose bisphosphate carboxylase large chain (Fragment)	Tacca artocarpifolia	51 kDa	0.92	0.017	1
564	UniRef100_B7UXI3	2	Putative membrane or periplasmic protein	Pseudomonas aeruginosa	17 kDa	1	0.16	2	UniRef100_Q02RT9
565	UniRef100_Q0CZT3	1	Putative uncharacterized protein	Aspergillus terreus NIH2624	72 kDa	1	0.049	2
566	UniRef100_C7PSC4	1	Tail sheath protein	Chitinophaga pinensis DSM 2588	51 kDa	0.99	0.022	1
567	UniRef100_A1CCI2	20	Catalase	Aspergillus clavatus	80 kDa	0.99	0.015	1	UniRef100_A1DJU9	UniRef100_A2Q7Q4	UniRef100_A7E705	UniRef100_B2AVW1	UniRef100_B2VSL9	UniRef100_B6H9T9	UniRef100_B6QW88	UniRef100_B8MT74	UniRef100_B8NLE2	UniRef100_C7YQY5	UniRef100_O60038	UniRef100_P78619	UniRef100_Q0CFQ7	UniRef100_Q27JP9	UniRef100_Q2H9X8	UniRef100_Q2V6Q5	UniRef100_Q877A8	UniRef100_Q92405	UniRef100_UPI000023EA71
568	UniRef100_Q6WE46	3	Actin	Amoeba proteus	42 kDa	1	0.04	2	UniRef100_Q6WE48	UniRef100_Q6WE51
569	UniRef100_A4RA79	6	Putative uncharacterized protein	Magnaporthe grisea	35 kDa	0.93	0.04	1	UniRef100_B2AEV9	UniRef100_C7ZHZ8	UniRef100_C9SA91	UniRef100_Q2GPP3	UniRef100_UPI000023F35D
570	UniRef100_B2API8	3	Predicted CDS Pa_5_11620	Podospora anserina	42 kDa	0.92	0.046	1	UniRef100_Q2GQD1	UniRef100_Q7S1X0
571	UniRef100_B6VJT7	9	Cytochrome b	Vitis vinifera	44 kDa	0.92	0.033	1	UniRef100_B9TAM2	UniRef100_O03194	UniRef100_P09843	UniRef100_P29757	UniRef100_P42792	UniRef100_Q645H4	UniRef100_Q6YSL7	UniRef100_Q95871
572	UniRef100_C9S9J0	1	Superoxide dismutase	Verticillium albo-atrum VaMs.102	16 kDa	0.92	0.084	1
573	UniRef100_Q51781	2	Protein F (Fragment)	Pseudomonas fluorescens	33 kDa	0.92	0.066	1	UniRef100_Q9WWI5
574	UniRef100_B9S6M1	2	Serine carboxypeptidase, putative	Ricinus communis	51 kDa	0.92	0.046	1	UniRef100_B9SUC4
575	UniRef100_C2FSR2	1	Elongation factor Tu	Sphingobacterium spiritivorum	43 kDa	0.92	0.028	1
576	UniRef100_P46256	1	Fructose-bisphosphate aldolase, cytoplasmic isozyme 1	Pisum sativum	38 kDa	0.91	0.056	1
577	UniRef100_B8LTH7	1	Choline dehydrogenase, putative	Talaromyces stipitatus ATCC 10500	74 kDa	0.93	0.024	1
578	UniRef100_Q11DD7	1	ATP synthase subunit alpha	Chelativorans sp. BNC1	55 kDa	0.92	0.031	1
579	UniRef100_UPI00016A54F0		porin, Gram-negative type	Burkholderia ubonensis Bu	40 kDa	0.92	0.024	1
580	UniRef100_A8NEG5	1	ATP synthase subunit beta	Coprinopsis cinerea okayama7#130	58 kDa	0.91	0.024	1
581	UniRef100_A6EF87	4	Putative uncharacterized protein	Pedobacter sp. BAL39	36 kDa	0.93	0.035	1	UniRef100_C2G3H5	UniRef100_C5PWV1	UniRef100_C6Y315
582	UniRef100_A4W8W9	3	OmpA domain protein transmembrane region-containing protein	Enterobacter sp. 638	38 kDa	0.92	0.034	1	UniRef100_B2VDE4	UniRef100_D0FTP3
583	UniRef100_Q9URR2	2	Allergen Pen n 13	Penicillium chrysogenum	40 kDa	0.92	0.028	1	UniRef100_Q9Y749
584	UniRef100_B6GVW4	1	Pc06g00180 protein	Penicillium chrysogenum Wisconsin 54-1255	54 kDa	0.92	0.04	1
585	UniRef100_A5B8Y6	6	Putative uncharacterized protein	Vitis vinifera	64 kDa	0.92	0.023	1	UniRef100_A5BLN2	UniRef100_D1IGA3	UniRef100_D1IGA8	UniRef100_Q8GUR0	UniRef100_Q8LJQ6
586	UniRef100_A4AFD1	2	50S ribosomal protein L5	marine actinobacterium PHSC20C1	22 kDa	0.92	0.061	1	UniRef100_C2CTQ4
587	UniRef100_A8D311	1	Metalloendopeptidase	Trichoderma hamatum	36 kDa	0.92	0.026	1
588	UniRef100_D0T5G4	1	Predicted protein	Acinetobacter radioresistens	13 kDa	0.91	0.087	1
589	UniRef100_A9IUF9	3	Outer membrane porin protein	Bordetella petrii DSM 12804	39 kDa	0.92	0.027	1	UniRef100_Q7W3L5	UniRef100_Q7WEZ0
590	UniRef100_A5C536	8	Putative uncharacterized protein	Vitis vinifera	60 kDa	0.93	0.024	1	UniRef100_B9GQ47	UniRef100_B9H5E3	UniRef100_B9SR02	UniRef100_D1HEK6	UniRef100_D1IWM5	UniRef100_O04870	UniRef100_Q9SFF1
591	UniRef100_A7BDD8	20	Putative uncharacterized protein	Actinomyces odontolyticus ATCC 17982	31 kDa	0.92	0.047	1	UniRef100_A9WL07	UniRef100_B1VYT7	UniRef100_B4V1T0	UniRef100_B5GD98	UniRef100_B5GZ26	UniRef100_B5HFK3	UniRef100_C9N9P6	UniRef100_D1BJ82	UniRef100_O31212	UniRef100_Q82JX7	UniRef100_UPI0000510414	UniRef100_UPI0001AEC9B2	UniRef100_UPI0001AED5A7	UniRef100_UPI0001AEF0B6	UniRef100_UPI0001B4B91D	UniRef100_UPI0001B4D836	UniRef100_UPI0001B552C1	UniRef100_UPI0001B57431	UniRef100_UPI0001BCCF29
592	UniRef100_A8NYS1	6	DNA damage checkpoint protein rad24	Coprinopsis cinerea okayama7#130	29 kDa	0.92	0.051	1	UniRef100_B0CXI9	UniRef100_Q4G2I8	UniRef100_Q4PEU7	UniRef100_Q9C161	UniRef100_Q9UR29
593	UniRef100_B0XT32	2	Pectate lyase A	Aspergillus fumigatus A1163	34 kDa	0.92	0.065	1	UniRef100_Q4WIT0
594	UniRef100_A1CRA3	3	40S ribosomal protein S3, putative	Aspergillus clavatus	29 kDa	0.92	0.045	1	UniRef100_A2RAI9	UniRef100_B8NRV3
595	UniRef100_C9SW44	1	Pectate lyase C	Verticillium albo-atrum VaMs.102	25 kDa	0.92	0.043	1
596	UniRef100_Q7UH35	1	Predicted cation efflux system (AcrB/AcrD/AcrF family)	Rhodopirellula baltica	116 kDa	0.91	0.0074	1
597	UniRef100_P12693	1	Aldehyde dehydrogenase	Pseudomonas aeruginosa group	53 kDa	0.92	0.017	1
598	UniRef100_D0WLG9	1	Putative extracellular nuclease	Actinomyces sp. oral taxon 848 str. F0332	95 kDa	0.91	0.0089	1
599	UniRef100_C1XX29	4	Ribulose-1,5-bisphosphate carboxylase/oxygenase large subunit	Meiothermus silvanus DSM 9946	53 kDa	0.93	0.021	1	UniRef100_C5H3A7	UniRef100_Q5J0C9	UniRef100_Q5J0D0
600	UniRef100_A3KCF4	34	Glucose-1-phosphate adenylyltransferase	Ipomoea batatas	57 kDa	0.92	0.027	1	UniRef100_A3KCF5	UniRef100_A7XAQ5	UniRef100_A9PF44	UniRef100_B3F8H7	UniRef100_B6RQ84	UniRef100_B8LNV7	UniRef100_B8LPY4	UniRef100_B9SF14	UniRef100_C6EVW5	UniRef100_D0EYG8	UniRef100_D1I528	UniRef100_O22629	UniRef100_O22657	UniRef100_P23509	UniRef100_P52416	UniRef100_P52417	UniRef100_P55232	UniRef100_P93476	UniRef100_P93477	UniRef100_Q0MSF8	UniRef100_Q2PXI9	UniRef100_Q38M81	UniRef100_Q42882	UniRef100_Q43152	UniRef100_Q43815	UniRef100_Q43816	UniRef100_Q84UT1	UniRef100_Q84XL2	UniRef100_Q8LLJ5	UniRef100_Q9AT05	UniRef100_Q9AT06	UniRef100_Q9AT46	UniRef100_Q9M462
601	UniRef100_A4YK56	7	Putative Glucose/sorbosone dehydrogenase	Bradyrhizobium sp. ORS278	47 kDa	0.92	0.024	1	UniRef100_A5E8V9	UniRef100_B3QE87	UniRef100_Q07ST1	UniRef100_Q13DI2	UniRef100_Q6NBU0	UniRef100_Q89WT7
602	UniRef100_Q6WNY9	1	Beta-tubulin (Fragment)	Hexamita inflata	42 kDa	0.92	0.039	1
603	UniRef100_A5B9P8	4	Putative uncharacterized protein	Vitis vinifera	27 kDa	0.92	0.036	1	UniRef100_C6JT64	UniRef100_D1IUJ7	UniRef100_UPI0001983A04
604	UniRef100_Q5NDC0	1	Serine proteinase	Penicillium chrysogenum	40 kDa	0.93	0.028	1
605	UniRef100_Q0V2B5	1	Putative uncharacterized protein	Phaeosphaeria nodorum	38 kDa	0.92	0.035	1
606	UniRef100_Q5B3S7	1	RS9_PODAN 40S ribosomal protein S9 (S7)	Emericella nidulans	22 kDa	0.92	0.041	1
607	UniRef100_A8DPS4	1	Alcohol oxidase	Gloeophyllum trabeum	73 kDa	0.91	0.015	1
608	UniRef100_A2DNL6	1	Putative uncharacterized protein	Trichomonas vaginalis G3	28 kDa	0.92	0.038	1
609	UniRef100_B9DGH8	6	AT3G60750 protein (Fragment)	Arabidopsis thaliana	61 kDa	0.91	0.021	1	UniRef100_Q84WI5	UniRef100_Q8LE99	UniRef100_Q8RWV0	UniRef100_Q944P9	UniRef100_Q9LZY8
610	UniRef100_A4RHW7	11	Putative uncharacterized protein	Magnaporthe grisea	22 kDa	0.99	0.088	1	UniRef100_A6RUP5	UniRef100_A7EEX6	UniRef100_A8QAJ5	UniRef100_B2W0W4	UniRef100_C7YZL3	UniRef100_Q2KN80	UniRef100_Q4P2C9	UniRef100_Q8TG28	UniRef100_Q96VY9	UniRef100_UPI000023DC13
611	UniRef100_Q0UVK1	1	Putative uncharacterized protein	Phaeosphaeria nodorum	82 kDa	0.98	0.018	1
612	UniRef100_P13794	1	Outer membrane porin F	Pseudomonas	38 kDa	0.98	0.06	1
613	UniRef100_A5B4I8	2	Putative uncharacterized protein	Vitis vinifera	47 kDa	0.92	0.026	1	UniRef100_D1H2M4
614	UniRef100_A8N5X6	1	Putative uncharacterized protein	Coprinopsis cinerea okayama7#130	23 kDa	0.99	0.064	1
615	UniRef100_D0SB02	1	Outer membrane protein A	Acinetobacter johnsonii SH046	38 kDa	1	0.037	1
616	UniRef100_A5V4K4	1	OmpA/MotB domain protein	Sphingomonas wittichii RW1	39 kDa	0.93	0.027	1
617	UniRef100_A5VBP4	1	Short-chain dehydrogenase/reductase SDR	Sphingomonas wittichii RW1	28 kDa	0.93	0.047	1
618	UniRef100_Q5QJB4	1	Harpin binding protein 1	Solanum lycopersicum	30 kDa	0.92	0.054	1
619	UniRef100_B9SYN6	3	Nutrient reservoir, putative	Ricinus communis	39 kDa	0.92	0.045	1	UniRef100_C6TGN6	UniRef100_D1I6E2
620	UniRef100_B8N3P1	1	Aspartic endopeptidase Pep2	Aspergillus	43 kDa	0.92	0.04	1
621	UniRef100_A1DCR4	7	Malate dehydrogenase	Neosartorya fischeri NRRL 181	36 kDa	0.92	0.059	1	UniRef100_A6R2W1	UniRef100_B0YB25	UniRef100_C0NDH1	UniRef100_C5GDR8	UniRef100_C5JSN2	UniRef100_C6HKC0
622	UniRef100_B5H4T6	1	Putative uncharacterized protein	Streptomyces pristinaespiralis ATCC 25486	83 kDa	0.93	0.014	1
623	UniRef100_B2W4A9	2	14-3-3 protein epsilon	Pyrenophora tritici-repentis Pt-1C-BFP	29 kDa	0.92	0.053	1	UniRef100_Q0U9C7
624	UniRef100_A9QVW1	4	Lipase	Gossypium hirsutum	40 kDa	0.92	0.052	1	UniRef100_B9S7Q1	UniRef100_B9S7Q2	UniRef100_B9S7Q3
625	UniRef100_Q2GQV4	2	Putative uncharacterized protein	Chaetomium globosum	40 kDa	0.92	0.032	1	UniRef100_Q2GTU3
626	UniRef100_P53476	1	Actin	Toxoplasma gondii	42 kDa	0.92	0.043	1
627	UniRef100_A1CR77	30	MAP kinase kinase (Mkk2), putative	Aspergillus clavatus	55 kDa	0.92	0.024	1	UniRef100_A1D448	UniRef100_A2RAN1	UniRef100_A6SFV5	UniRef100_A7E437	UniRef100_B0XPE4	UniRef100_B2AXE3	UniRef100_B2VRN2	UniRef100_B6H9J1	UniRef100_B6Q671	UniRef100_B8M867	UniRef100_B8NRY2	UniRef100_C0NUA0	UniRef100_C0S329	UniRef100_C1G0V5	UniRef100_C1GTG3	UniRef100_C4JKA8	UniRef100_C5G9L0	UniRef100_C5P984	UniRef100_C6H1Q2	UniRef100_C7YR08	UniRef100_C8V4L9	UniRef100_C9SEC6	UniRef100_Q0CTE3	UniRef100_Q0U8J5	UniRef100_Q6SQI1	UniRef100_Q7RYZ6	UniRef100_Q8NJQ6	UniRef100_Q9HEP5	UniRef100_UPI0000D86DB1
628	UniRef100_B9T487	1	DUF26 domain-containing protein 1, putative	Ricinus communis	31 kDa	0.92	0.032	1
629	UniRef100_B5BQV5	1	Cathepsin B-like cysteine protease (Fragment)	Raphanus sativus	38 kDa	0.91	0.032	1
630	UniRef100_B2VV71	2	Cip2	Pyrenophora tritici-repentis Pt-1C-BFP	41 kDa	0.92	0.046	1	UniRef100_Q0UG08
631	UniRef100_C6T9E5	1	Putative uncharacterized protein	Glycine max	42 kDa	0.92	0.031	1
632	UniRef100_A1Z1Z6	1	Catalase	Prunus avium	57 kDa	0.92	0.028	1
633	UniRef100_A6V123	2	30S ribosomal protein S16	Pseudomonas aeruginosa	9 kDa	0.93	0.17	1	UniRef100_Q02RL8
634	UniRef100_A1B011	11	50S ribosomal protein L11	Paracoccus denitrificans PD1222	16 kDa	0.92	0.11	1	UniRef100_A3S871	UniRef100_A3W798	UniRef100_A4WVM0	UniRef100_A6E306	UniRef100_A9DZJ1	UniRef100_B4SKV2	UniRef100_B8GV69	UniRef100_B8PZT5	UniRef100_C8S531	UniRef100_Q3J5T4
635	UniRef100_Q3A4E4	2	Pectate lyase	Pelobacter carbinolicus DSM 2380	49 kDa	0.92	0.029	1	UniRef100_Q3A4E5
636	UniRef100_C7YWL1	1	Predicted protein	Nectria haematococca mpVI 77-13-4	49 kDa	0.92	0.026	1
637	UniRef100_C7YJ69	1	Predicted protein	Nectria haematococca mpVI 77-13-4	68 kDa	0.92	0.017	1
638	UniRef100_B2AWQ6	13	Predicted CDS Pa_7_7970	Podospora anserina	41 kDa	0.91	0.042	1	UniRef100_B2Z3E2	UniRef100_B3KYI8	UniRef100_B3VQR5	UniRef100_B8XWZ7	UniRef100_C7BUC1	UniRef100_O13315	UniRef100_O42784	UniRef100_Q00580	UniRef100_Q05425	UniRef100_Q2H8Y3	UniRef100_Q875J4	UniRef100_Q96VN7
639	UniRef100_B0D7B4	4	Glyceraldehyde-3-phosphate dehydrogenase	Laccaria bicolor S238N-H82	37 kDa	0.91	0.044	1	UniRef100_B0DTV6	UniRef100_P32638	UniRef100_Q8TFJ2
640	UniRef100_A6SG86	2	Putative uncharacterized protein	Botryotinia fuckeliana B05.10	35 kDa	0.92	0.031	1	UniRef100_A7F8Q9
641	UniRef100_B6TL22	18	Protein P21	Zea mays	24 kDa	0.92	0.07	1	UniRef100_B8QXW3	UniRef100_B8QXW6	UniRef100_B8QXY1	UniRef100_B8QXY6	UniRef100_B8QXZ0	UniRef100_B8QXZ1	UniRef100_B8QY03	UniRef100_B8QY29	UniRef100_B8QY30	UniRef100_B8QY31	UniRef100_B8QY33	UniRef100_P13867	UniRef100_P33679	UniRef100_Q2XXI8	UniRef100_Q2XXJ3	UniRef100_Q2XXJ6	UniRef100_Q2XXK5
642	UniRef100_Q84R44	2	Beta-fructofuranosidase, insoluble isoenzyme 3, putative, expressed	Oryza sativa Japonica Group	40 kDa	0.93	0.027	1	UniRef100_UPI0000E121F6
643	UniRef100_C7PRK1	1	Glyceraldehyde-3-phosphate dehydrogenase, type I	Chitinophaga pinensis DSM 2588	36 kDa	0.92	0.033	1
644	UniRef100_A6RW49	1	Fructose-bisphosphate aldolase	Botryotinia fuckeliana B05.10	39 kDa	0.92	0.039	1
645	UniRef100_C6TDZ7	3	Putative uncharacterized protein	Glycine max	40 kDa	0.92	0.044	1	UniRef100_D1H8F6	UniRef100_UPI00019831AA
646	UniRef100_Q38793	1	Ribulose bisphosphate carboxylase small chain, chloroplastic	Aegilops tauschii	20 kDa	0.91	0.097	1
647	UniRef100_B9S1V6	4	2,3-bisphosphoglycerate-independent phosphoglycerate mutase	Ricinus communis	61 kDa	0.92	0.021	1	UniRef100_P35493	UniRef100_Q8LF55	UniRef100_Q9M9K1
648	UniRef100_C5DH87	1	KLTH0E02200p	Lachancea thermotolerans CBS 6340	87 kDa	0.93	0.013	1
649	UniRef100_A6SRA3	10	Putative uncharacterized protein	Botryotinia fuckeliana B05.10	37 kDa	0.92	0.029	1	UniRef100_A7EYS9	UniRef100_C0S115	UniRef100_C1G9C3	UniRef100_C1GR21	UniRef100_C4JVL4	UniRef100_C5P0P5	UniRef100_Q0CRB8	UniRef100_Q1ACW3	UniRef100_UPI0000D871DD
650	UniRef100_UPI0000D9BCFF		PREDICTED: similar to Transmembrane emp24 domain-containing protein 10 precursor (Transmembrane protein Tmp21) (21 kDa transmembrane trafficking protein) (p24delta) (S31III125) (S31I125) (Tmp-21-I)	Macaca mulatta	37 kDa	0.92	0.021	1
651	UniRef100_C0LEE6	1	ATP:ADP antiporter	Piriformospora indica	34 kDa	0.91	0.038	1
652	UniRef100_D1H531	2	Whole genome shotgun sequence of line PN40024, scaffold_4.assembly12x (Fragment)	Vitis vinifera	28 kDa	0.91	0.061	1	UniRef100_UPI00015C7CFD
653	UniRef100_C5IW59	2	Glutamine synthetase	Lolium perenne	39 kDa	0.92	0.045	1	UniRef100_O24333
654	UniRef100_A1RH80	3	Putative uncharacterized protein	Shewanella sp. W3-18-1	9 kDa	0.91	0.16	1	UniRef100_C3NU01	UniRef100_C9E5M0
655	UniRef100_A3RRN0	29	Glutamate/aspartate-binding protein	Ralstonia solanacearum	33 kDa	0.91	0.04	1	UniRef100_A5VZG3	UniRef100_A6V8L2	UniRef100_B0KUG4	UniRef100_B1J4G7	UniRef100_B2AH47	UniRef100_B2UFJ2	UniRef100_B7UVN3	UniRef100_B9NGP7	UniRef100_B9Z7M4	UniRef100_C1DLN0	UniRef100_C3KBL7	UniRef100_C6BC44	UniRef100_C7RQS8	UniRef100_Q02JI3	UniRef100_Q0KEE9	UniRef100_Q1IE20	UniRef100_Q3K7I2	UniRef100_Q475U4	UniRef100_Q48EZ8	UniRef100_Q4K731	UniRef100_Q4ZPI4	UniRef100_Q7P1U2	UniRef100_Q87XK7	UniRef100_Q88NY2	UniRef100_Q8Y255	UniRef100_UPI00018738F3	UniRef100_UPI0001AF62AA	UniRef100_UPI0001BC8F17
656	UniRef100_B4F9T3	6	Putative uncharacterized protein	Zea mays	33 kDa	0.92	0.035	1	UniRef100_B8ARC8	UniRef100_C5YER4	UniRef100_C6THV3	UniRef100_Q7F8Y3	UniRef100_Q7X8I9
657	UniRef100_B2B1H6	2	Predicted CDS Pa_3_10150	Podospora anserina	34 kDa	0.91	0.035	1	UniRef100_Q2GNA8
658	UniRef100_A9PEX3	5	Cytochrome b6-f complex iron-sulfur subunit	Populus trichocarpa	24 kDa	0.92	0.053	1	UniRef100_B9I6H7	UniRef100_B9RHM7	UniRef100_C6SXW5	UniRef100_P26291
659	UniRef100_Q1CX36	1	ATP synthase subunit beta	Myxococcus xanthus DK 1622	52 kDa	0.92	0.031	1
660	UniRef100_B5EMD0	1	Translation initiation factor IF-2	Acidithiobacillus ferrooxidans	93 kDa	0.91	0.015	1
661	UniRef100_C6XYB3	1	OmpA/MotB domain protein	Pedobacter heparinus DSM 2366	48 kDa	0.91	0.031	1
662	UniRef100_Q8PZ67	2	F420H2 dehydrogenase subunit FpoF	Methanosarcina mazei	38 kDa	0.91	0.066	1	UniRef100_Q9P9F1
663	UniRef100_B2VS63	1	WD repeat containing protein 51A	Pyrenophora tritici-repentis Pt-1C-BFP	35 kDa	0.92	0.041	1
664	UniRef100_B8N000	2	Isocitrate dehydrogenase Idp1, putative	Aspergillus flavus NRRL3357	56 kDa	0.92	0.032	1	UniRef100_Q2UQ36
665	UniRef100_A1Y0H0	26	Elongation factor 1a (Fragment)	Tetragonula minor	17 kDa	0.92	0.093	1	UniRef100_A1Y0I1	UniRef100_A2I4T4	UniRef100_A2I4T5	UniRef100_A2I4T7	UniRef100_A2I4T8	UniRef100_A2I4U2	UniRef100_A2I4U3	UniRef100_A2I4U5	UniRef100_A2I4U6	UniRef100_A2I4V0	UniRef100_A2I4V5	UniRef100_A2I4W7	UniRef100_A2I4X3	UniRef100_C4MN97	UniRef100_C4MN98	UniRef100_C4MN99	UniRef100_C4MNA0	UniRef100_C4MNA3	UniRef100_C4MNA4	UniRef100_C4MNA6	UniRef100_C4MNA9	UniRef100_C4MNB0	UniRef100_C4MNB3	UniRef100_C4MNB4	UniRef100_C5H1V7
666	UniRef100_A9XIZ5	1	Translation elongation factor 1 alpha (Fragment)	Cordyceps cf. pruinosa EFCC 5693	36 kDa	0.91	0.072	1
667	UniRef100_A7UGA7	4	Chitinase (Fragment)	Cucurbita moschata	12 kDa	0.92	0.15	1	UniRef100_O80404	UniRef100_Q207U1	UniRef100_Q8W428
668	UniRef100_Q96VL0	1	Superoxide dismutase [Cu-Zn]	Claviceps purpurea	16 kDa	0.91	0.11	1
669	UniRef100_UPI000023E94A	1	hypothetical protein FG09341.1	Gibberella zeae PH-1	68 kDa	0.92	0.019	1
670	UniRef100_Q565W5	1	Spermidine synthase	uncultured bacterium	25 kDa	0.92	0.058	1
671	UniRef100_B9GFF3	1	Predicted protein	Populus trichocarpa	42 kDa	0.92	0.031	1
672	UniRef100_B9T7S8	1	Putative uncharacterized protein	Ricinus communis	42 kDa	0.92	0.026	1
673	UniRef100_B3N2H1	3	GF20391	Drosophila ananassae	21 kDa	0.91	0.078	1	UniRef100_Q4SKJ3	UniRef100_UPI00016E664B
674	UniRef100_B5GE40	1	Putative uncharacterized protein (Fragment)	Streptomyces sp. SPB74	64 kDa	0.91	0.012	1
675	UniRef100_C5TF84	2	Heme exporter protein CcmA	Zymomonas mobilis subsp. mobilis ATCC 10988	22 kDa	0.91	0.049	1	UniRef100_C8WCR9
676	UniRef100_A7LNX7	3	Thioredoxin	Limonium bicolor	20 kDa	0.91	0.059	1	UniRef100_D1HGN2	UniRef100_UPI0001985730
677	UniRef100_Q8J1Y0	1	70 kDa heat shock protein 2	Rhizopus stolonifer	70 kDa	0.92	0.019	1
678	UniRef100_A1DCL5	14	40S ribosomal protein S13	Neosartorya fischeri NRRL 181	17 kDa	0.91	0.073	1	UniRef100_A4RFG9	UniRef100_A6R4V4	UniRef100_B0YCP0	UniRef100_B2AU33	UniRef100_B2WCZ9	UniRef100_C4R7Y4	UniRef100_C5FT17	UniRef100_C5GD45	UniRef100_C7YQ25	UniRef100_Q0UV15	UniRef100_Q7SDH0	UniRef100_UPI000023E254	cont2O00103
679	UniRef100_A0AWZ6	2	Fucose-binding lectin II	Burkholderia cenocepacia	26 kDa	0.92	0.074	1	UniRef100_B4EH85
680	UniRef100_Q7RWN7	1	Predicted protein	Neurospora crassa	34 kDa	0.92	0.038	1
681	UniRef100_Q94A28	2	Aconitate hydratase 3, mitochondrial	Arabidopsis thaliana	108 kDa	0.91	0.015	1	UniRef100_UPI000173942A
682	UniRef100_B1W035	2	Metalloendopeptidase griselysin	Streptomyces griseus subsp. griseus NBRC 13350	70 kDa	0.93	0.016	1	UniRef100_Q83WH1
683	UniRef100_B9RTX7	1	Glucose-1-phosphate adenylyltransferase	Ricinus communis	59 kDa	0.91	0.015	1
684	UniRef100_Q9Y707	1	Actin-2	Suillus bovinus	42 kDa	0.92	0.056	1
685	UniRef100_A7F700	1	Putative uncharacterized protein	Sclerotinia sclerotiorum 1980 UF-70	21 kDa	0.91	0.058	1
686	UniRef100_A5ACX0	5	Putative uncharacterized protein	Vitis vinifera	53 kDa	0.92	0.037	1	UniRef100_B9HLR6	UniRef100_D1HQD3	UniRef100_Q45RS3	UniRef100_Q45RS4
687	UniRef100_A1CA34	30	ABC transporter, putative	Aspergillus clavatus	69 kDa	0.99	0.021	1	UniRef100_A1DFC5	UniRef100_A2R961	UniRef100_A4R228	UniRef100_A6QZU7	UniRef100_A6RZ56	UniRef100_A7EQA7	UniRef100_B0Y3K9	UniRef100_B2B5E2	UniRef100_B2VVP2	UniRef100_B6HVB4	UniRef100_B6Q290	UniRef100_B8MR50	UniRef100_B8NE08	UniRef100_C0RXT4	UniRef100_C1G635	UniRef100_C1H1W8	UniRef100_C4JN87	UniRef100_C5FW62	UniRef100_C5GUR6	UniRef100_C5P7C3	UniRef100_C6HLN8	UniRef100_C7Z1Y7	UniRef100_C8VMK1	UniRef100_C9SXH3	UniRef100_Q0CAI1	UniRef100_Q0TYW2	UniRef100_Q2GX89	UniRef100_Q872I6	UniRef100_UPI000023CAC3
688	UniRef100_Q0UCL1	1	Putative uncharacterized protein	Phaeosphaeria nodorum	50 kDa	0.98	0.026	1
689	UniRef100_C6T868	3	Putative uncharacterized protein	Glycine max	29 kDa	0.99	0.052	1	UniRef100_C6TKW2	UniRef100_Q9XQB1
690	UniRef100_A5BIU6	6	Putative uncharacterized protein	Vitis vinifera	44 kDa	0.93	0.03	1	UniRef100_B8AXJ6	UniRef100_B9HQB4	UniRef100_D1H536	UniRef100_Q75IM9	UniRef100_UPI0001983746
691	UniRef100_A1DK93	1	Secreted glucosidase	Neosartorya fischeri NRRL 181	31 kDa	0.92	0.032	1
692	UniRef100_B0RKF0	1	Porin	Herbaspirillum seropedicae	39 kDa	0.92	0.031	1
693	UniRef100_C5Y5G7	1	Putative uncharacterized protein Sb05g023220	Sorghum bicolor	31 kDa	0.92	0.041	1
694	UniRef100_D0Y4C8	1	Membrane protein involved in aromatic hydrocarbon degradation	Caulobacter segnis ATCC 21756	47 kDa	0.92	0.034	1
695	UniRef100_B9JEF2	1	Porin outer membrane protein	Agrobacterium radiobacter K84	43 kDa	0.92	0.043	1
696	UniRef100_A2TSA3	1	Two-component system, transcriptional regulatory protein	Dokdonia donghaensis MED134	26 kDa	0.92	0.044	1
697	UniRef100_A1C444	2	Beta-N-acetylhexosaminidase NagA, putative	Aspergillus clavatus	68 kDa	0.92	0.02	1	UniRef100_B6HFN5
698	UniRef100_C9NFC1	1	Xylose isomerase domain protein TIM barrel	Streptomyces flavogriseus ATCC 33331	40 kDa	0.92	0.036	1
699	UniRef100_A1SNN5	33	Elongation factor Tu	Nocardioides sp. JS614	44 kDa	0.92	0.04	1	UniRef100_A6N2C1	UniRef100_B1W416	UniRef100_B2LLM2	UniRef100_B2LLM4	UniRef100_B2LLM5	UniRef100_B2LLM6	UniRef100_B4V503	UniRef100_B5GHV7	UniRef100_B5GX54	UniRef100_B5HFD4	UniRef100_B5HQ31	UniRef100_C1WG78	UniRef100_C7Q2L4	UniRef100_C9N635	UniRef100_C9YW92	UniRef100_O33594	UniRef100_P29542	UniRef100_P40174	UniRef100_P95724	UniRef100_Q53871	UniRef100_Q82DQ0	UniRef100_Q93T39	UniRef100_Q9RG53	UniRef100_Q9RG55	UniRef100_UPI0001AEEF3B	UniRef100_UPI0001AEFB5D	UniRef100_UPI0001B4C0C7	UniRef100_UPI0001B50F78	UniRef100_UPI0001B5156B	UniRef100_UPI0001B54EF7	UniRef100_UPI0001B5725C	UniRef100_UPI0001BCE7C4
700	UniRef100_Q2NU70	1	Outer membrane protein A	Sodalis glossinidius str. 'morsitans'	38 kDa	0.92	0.039	1
701	UniRef100_A9FNQ8	1	Probable Inorganic polyphosphate/ATP-NAD kinase	Sorangium cellulosum 'So ce 56'	34 kDa	0.92	0.035	1
702	UniRef100_B2WBD2	6	Arabinofuranosidase/B-xylosidase	Pyrenophora tritici-repentis Pt-1C-BFP	52 kDa	0.92	0.026	1	UniRef100_O74288	UniRef100_P48792	UniRef100_Q0US03	UniRef100_Q86ZN9	UniRef100_Q92455
703	UniRef100_B0FXM0	12	Endo-1,4-beta-xylanase	Hypocrea pseudokoningii	24 kDa	0.92	0.067	1	UniRef100_B2CNY5	UniRef100_B2CZF9	UniRef100_B5A7N4	UniRef100_P36217	UniRef100_P48793	UniRef100_Q02244	UniRef100_Q6QNU8	UniRef100_Q7Z8Q3	UniRef100_Q99015	UniRef100_Q9UVF9	UniRef100_UPI0001753AD0
704	UniRef100_C6SWY1	1	Putative uncharacterized protein	Glycine max	8 kDa	0.92	0.3	1
705	UniRef100_Q8SIE9	1	ATP synthase subunit alpha (Fragment)	Galax urceolata	43 kDa	0.92	0.028	1
706	UniRef100_A9ADI9	3	30S ribosomal protein S7	Burkholderia	18 kDa	0.92	0.077	1	UniRef100_B1YRC6	UniRef100_B2JIH0
707	UniRef100_B9H5L4	2	Predicted protein	Populus trichocarpa	34 kDa	0.92	0.044	1	UniRef100_B9SW87
708	UniRef100_B6TCE9	1	Peptidyl-prolyl cis-trans isomerase	Zea mays	26 kDa	0.92	0.073	1
709	UniRef100_A4ALW8	2	30S ribosomal protein S9	marine actinobacterium PHSC20C1	17 kDa	0.92	0.086	1	UniRef100_Q6AD27
710	UniRef100_A1C636	16	Glucose-6-phosphate isomerase	Aspergillus clavatus	62 kDa	0.92	0.027	1	UniRef100_A2R808	UniRef100_A4R8F3	UniRef100_A5DCC1	UniRef100_B2AN72	UniRef100_B6HQ15	UniRef100_B6QD47	UniRef100_B8MC78	UniRef100_C5FNQ0	UniRef100_C7YV89	UniRef100_C8V308	UniRef100_C9S5K1	UniRef100_Q0CPH5	UniRef100_Q2H1D0	UniRef100_UPI000023D75D	UniRef100_UPI000151AA4F
711	UniRef100_A7J0K4	1	Putative polyphenol oxidase (Fragment)	Frangula californica	35 kDa	0.92	0.054	1
712	UniRef100_Q86ZV6	1	Heat shock cognate protein 70 (Fragment)	Rhizopus stolonifer	59 kDa	0.92	0.033	1
713	UniRef100_Q5D862	2	Filaggrin-2	Homo sapiens	248 kDa	0.92	0.005	1	UniRef100_UPI0000D99BCB
714	UniRef100_A1D8X9	2	Aldehyde dehydrogenase	Neosartorya fischeri NRRL 181	54 kDa	0.92	0.028	1	UniRef100_B0YBR6
715	UniRef100_P29409	1	Phosphoglycerate kinase, chloroplastic (Fragment)	Spinacia oleracea	46 kDa	0.92	0.051	1
716	UniRef100_B9SVA7	1	Aspartic proteinase, putative	Ricinus communis	56 kDa	0.92	0.037	1
717	UniRef100_C8VPM8	2	Endo-1,4-beta-xylanase C (Xylanase C)(EC 3.2.1.8)(1,4-beta-D-xylan xylanohydrolase C)(34 kDa xylanase)(Xylanase X34) [Source:UniProtKB/Swiss-Prot;Acc:Q00177]	Aspergillus nidulans FGSC A4	34 kDa	0.92	0.049	1	UniRef100_Q00177
718	UniRef100_UPI0000E802F6		PREDICTED: similar to putative DNA dependent ATPase and helicase	Gallus gallus	285 kDa	0.92	0.0063	1
719	UniRef100_Q5B2V1	1	Heat shock 70 kDa protein	Emericella nidulans	70 kDa	0.92	0.017	1
720	UniRef100_C0JX32	1	Photosystem II D2 protein	Pyramimonas parkeae	39 kDa	0.91	0.062	1
721	UniRef100_C9SH36	1	Fumarate reductase	Verticillium albo-atrum VaMs.102	67 kDa	0.92	0.021	1
722	UniRef100_A5BE19	2	Phosphoribulokinase	Vitis vinifera	45 kDa	0.91	0.051	1	UniRef100_UPI000198638E
723	UniRef100_A2Q3K0	4	AAA ATPase; ABC transporter, transmembrane region, type 1	Medicago truncatula	69 kDa	0.92	0.023	1	UniRef100_A5BX90	UniRef100_D1HSP7	UniRef100_UPI00019857E3
724	UniRef100_A5AYR7	25	Putative uncharacterized protein	Vitis vinifera	45 kDa	0.91	0.029	1	UniRef100_A8VYM0	UniRef100_A9PGB1	UniRef100_A9PJJ2	UniRef100_B0LSR2	UniRef100_B4FJM9	UniRef100_B6TSK5	UniRef100_B7FHW7	UniRef100_B8Q8Q0	UniRef100_B9HC79	UniRef100_B9SPG7	UniRef100_C6TFM3	UniRef100_D1I953	UniRef100_O64422	UniRef100_P22418	UniRef100_P25851	UniRef100_P46275	UniRef100_Q07204	UniRef100_Q42796	UniRef100_Q94FA7	UniRef100_Q9T2L3	UniRef100_Q9TNN1	UniRef100_Q9XF82	UniRef100_Q9ZP29	UniRef100_UPI0001983CF8
725	UniRef100_B2VTZ4	2	Histone H4	Pleosporales	11 kDa	0.92	0.17	1	UniRef100_B6GYM8
726	UniRef100_B0CVI2	1	Predicted protein	Laccaria bicolor S238N-H82	34 kDa	0.91	0.038	1
727	UniRef100_Q5KFB9	1	ATP synthase subunit alpha	Filobasidiella neoformans	58 kDa	0.91	0.03	1
728	UniRef100_B9HL67	2	Predicted protein	Populus trichocarpa	48 kDa	0.91	0.036	1	UniRef100_Q5NE17
729	UniRef100_UPI000187E33E		hypothetical protein MPER_09405	Moniliophthora perniciosa FA553	28 kDa	0.91	0.054	1
730	UniRef100_Q0AH86	1	HemY domain protein	Nitrosomonas eutropha C91	44 kDa	0.92	0.025	1
731	UniRef100_A1CID0	30	Vacuolar protein sorting-associated protein 26, putative	Aspergillus clavatus	40 kDa	0.92	0.037	1	UniRef100_A1CWC9	UniRef100_A2Q9B7	UniRef100_A4RMC8	UniRef100_A6QVT2	UniRef100_A6RWG9	UniRef100_A7EN85	UniRef100_A8P0A5	UniRef100_A8PY79	UniRef100_B0D4D1	UniRef100_B0Y4G9	UniRef100_B2ALR1	UniRef100_B2WNE4	UniRef100_B6HUD3	UniRef100_B8N139	UniRef100_C0NJL9	UniRef100_C0S5A9	UniRef100_C4JSB8	UniRef100_C5FU79	UniRef100_C5GKJ5	UniRef100_C5PG19	UniRef100_C7YKH6	UniRef100_C8V3X1	UniRef100_C9SJF1	UniRef100_Q0CR25	UniRef100_Q0TZS3	UniRef100_Q2HAG1	UniRef100_Q7SGA7	UniRef100_UPI000023EBF3	UniRef100_UPI0000D864F4
732	UniRef100_A1CJP8	44	Proteasome regulatory particle subunit Rpt1, putative	Aspergillus clavatus	49 kDa	0.92	0.03	1	UniRef100_A1D7R9	UniRef100_A1KXD9	UniRef100_A1KXE0	UniRef100_A2QEZ6	UniRef100_A3GFY8	UniRef100_A4RK83	UniRef100_A5DQH3	UniRef100_A5DWN2	UniRef100_A6RQ32	UniRef100_A7E947	UniRef100_A7TH38	UniRef100_B2A906	UniRef100_B2WDQ8	UniRef100_B6HFS5	UniRef100_B6JY30	UniRef100_B6QVW1	UniRef100_B6QVW2	UniRef100_B8MSC4	UniRef100_B8NTR9	UniRef100_C0S7H3	UniRef100_C4JHY7	UniRef100_C4R8S3	UniRef100_C4Y5E3	UniRef100_C5DMB7	UniRef100_C5DQD3	UniRef100_C5FYZ1	UniRef100_C5P332	UniRef100_C7YH46	UniRef100_C8ZC29	UniRef100_C9SIM3	UniRef100_O42931	UniRef100_P33299	UniRef100_Q0CX89	UniRef100_Q0TVC0	UniRef100_Q2HEB6	UniRef100_Q6BQ86	UniRef100_Q6C9G4	UniRef100_Q6CNB8	UniRef100_Q6FUX2	UniRef100_Q75C66	UniRef100_Q7SDQ8
733	UniRef100_B2B7T6	2	Predicted CDS Pa_2_12200	Podospora anserina	46 kDa	0.91	0.034	1	UniRef100_Q7S7R7
734	2001373057	1	[Soil: Diversa Silage]		26 kDa	0.93	0.038	1
735	UniRef100_B4D1K7	1	Glycosyl transferase group 1	Chthoniobacter flavus Ellin428	41 kDa	0.91	0.027	1
736	UniRef100_A3U9W0	1	Putative uncharacterized protein	Croceibacter atlanticus HTCC2559	140 kDa	0.92	0.0081	1
737	UniRef100_A1CUJ6	7	Ribosomal protein S13p/S18e	Aspergillus clavatus	18 kDa	0.92	0.071	1	UniRef100_B0XM75	UniRef100_C0SGX8	UniRef100_C1GG76	UniRef100_C4JNM3	UniRef100_C5P213	UniRef100_C8VGH9
738	UniRef100_D0XX03	1	Methyltransferase	Caulobacter segnis ATCC 21756	33 kDa	0.91	0.053	1
739	UniRef100_Q96VT4	1	Catalase-peroxidase	Emericella nidulans	82 kDa	0.93	0.015	1
740	UniRef100_A1CI63	31	Fructose-1,6-bisphosphatase	Aspergillus clavatus	39 kDa	0.93	0.031	1	UniRef100_A1CWN2	UniRef100_A2QIZ8	UniRef100_A4RLW9	UniRef100_A6R115	UniRef100_A6S8S2	UniRef100_A7F199	UniRef100_B0Y6W2	UniRef100_B2AQX6	UniRef100_B2VW86	UniRef100_B6HV64	UniRef100_B6QQF9	UniRef100_B8LW05	UniRef100_B8N3B8	UniRef100_C0NQI1	UniRef100_C0S6N4	UniRef100_C1GVY7	UniRef100_C4JS44	UniRef100_C5FUG7	UniRef100_C5GCP1	UniRef100_C5PG87	UniRef100_C6HSB3	UniRef100_C7Z5E5	UniRef100_C9STI4	UniRef100_Q0CQT5	UniRef100_Q0U1F6	UniRef100_Q2GSW6	UniRef100_Q7S6N8	UniRef100_Q8J265	UniRef100_Q9HGZ4	UniRef100_UPI000023EE51
741	UniRef100_A6H7D3	6	KRT18 protein (Fragment)	Bos taurus	49 kDa	0.92	0.02	1	UniRef100_A8D349	UniRef100_UPI00004A6C0F	UniRef100_UPI00005A4B89	UniRef100_UPI00005A4B8A	UniRef100_UPI00005BC872
742	UniRef100_B8H408	1	TonB-dependent outer membrane receptor	Caulobacter vibrioides	120 kDa	0.91	0.012	1
743	UniRef100_A5B2H3	2	Putative uncharacterized protein	Vitis vinifera	24 kDa	0.92	0.081	1	UniRef100_UPI00015CBDC9
744	UniRef100_C3WPZ7	1	Predicted protein	Fusobacterium sp. 4_1_13	91 kDa	0.92	0.0092	1
745	UniRef100_C6RLV9	1	Glutathione S-transferase domain protein	Acinetobacter radioresistens	29 kDa	0.93	0.039	1
746	UniRef100_C4M5P2	1	Putative uncharacterized protein	Entamoeba histolytica HM-1:IMSS	107 kDa	0.92	0.0097	1
747	UniRef100_UPI00016C3796		Aldehyde dehydrogenase (NAD+)	Gemmata obscuriglobus UQM 2246	53 kDa	0.92	0.024	1
748	UniRef100_Q1LUB5	2	Novel protein similar to vertebrate cathepsin L (CTSL) (Fragment)	Danio rerio	37 kDa	0.92	0.042	1	UniRef100_Q1LXE8
749	UniRef100_P23704	1	ATP synthase subunit beta, mitochondrial	Neurospora crassa	56 kDa	0.91	0.037	1
750	UniRef100_A3Z6L9	1	Putative uncharacterized protein	Synechococcus sp. RS9917	12 kDa	0.92	0.071	1
751	UniRef100_B5GD75	1	Signal recognition particle protein (Fragment)	Streptomyces sp. SPB74	62 kDa	0.92	0.038	1
752	UniRef100_A9P8L8	1	Putative uncharacterized protein	Populus trichocarpa	34 kDa	0.92	0.037	1
753	UniRef100_B2VSL6	2	Protein transport protein Sec24	Pyrenophora tritici-repentis Pt-1C-BFP	96 kDa	0.92	0.013	1	UniRef100_Q0UYJ3
754	UniRef100_B0DFA1	1	Predicted protein	Laccaria bicolor S238N-H82	20 kDa	0.91	0.053	1
755	UniRef100_C8VD74	2	Alpha-rhamnosidase (Eurofung)	Emericella nidulans	100 kDa	0.93	0.015	1	UniRef100_Q0CTR2
756	UniRef100_A8N8Z1	2	Putative uncharacterized protein	Coprinopsis cinerea okayama7#130	61 kDa	0.91	0.021	1	UniRef100_B0CU00
757	UniRef100_C1Q8I0	1	tRNA (5-methylaminomethyl-2-thiouridylate)-methyltransferase	Brachyspira murdochii DSM 12563	40 kDa	0.92	0.062	1
758	UniRef100_Q2HB08	2	Putative uncharacterized protein	Chaetomium globosum	60 kDa	0.91	0.027	1	UniRef100_UPI000023F078
759	UniRef100_Q0PPW6	1	Translation elongation factor-1 alpha (Fragment)	Pertusaria dactylina	29 kDa	0.91	0.065	1
760	UniRef100_B9R6T2	1	Hydrolase, hydrolyzing O-glycosyl compounds, putative	Ricinus communis	71 kDa	0.92	0.017	1
761	UniRef100_B0T8T3	1	Cold-shock DNA-binding domain protein	Caulobacter sp. K31	19 kDa	0.91	0.067	1
762	UniRef100_UPI00017EFE84		PREDICTED: similar to phosphoinositide-3-kinase adaptor protein 1	Sus scrofa	101 kDa	0.91	0.025	1
763	UniRef100_Q871C5	1	Putative uncharacterized protein	Neurospora crassa	31 kDa	0.92	0.063	1
764	UniRef100_A4UC83	5	Putative uncharacterized protein	Magnaporthe grisea	44 kDa	0.91	0.029	1	UniRef100_B2ACB8	UniRef100_B6QPK4	UniRef100_B8M3T1	UniRef100_Q2GYZ7
765	UniRef100_O14460	1	Elongation factor 2	Schizosaccharomyces pombe	93 kDa	0.91	0.019	1
766	UniRef100_A3RJ53	3	FliC	Pseudomonas aeruginosa	49 kDa	1	0.057	2	UniRef100_P72151	UniRef100_Q02IQ9
767	UniRef100_Q8I0X7	2	Histone H4 (Fragment)	Oikopleura dioica	11 kDa	1	0.13	2	UniRef100_Q8I0Y4
768	UniRef100_A6RTN5	2	Putative uncharacterized protein	Botryotinia fuckeliana B05.10	16 kDa	0.91	0.087	1	UniRef100_A7EZ32
769	UniRef100_A8MQH1	5	Uncharacterized protein At1g15690.2	Arabidopsis thaliana	68 kDa	0.93	0.022	1	UniRef100_P31414	UniRef100_Q1W2P4	UniRef100_Q6T553	UniRef100_Q8L5B2
770	UniRef100_B9G1F0	1	Putative uncharacterized protein	Oryza sativa Japonica Group	21 kDa	0.93	0.078	1
771	UniRef100_Q08ZC1	1	Aqualysin-1	Stigmatella aurantiaca DW4/3-1	87 kDa	0.93	0.019	1
772	UniRef100_B6XJK7	1	Putative uncharacterized protein	Providencia alcalifaciens DSM 30120	70 kDa	0.93	0.021	1
773	UniRef100_C0S8K9	2	Catalase B	Paracoccidioides brasiliensis Pb03	82 kDa	0.93	0.018	1	UniRef100_C1G035
774	UniRef100_P00762	1	Anionic trypsin-1	Rattus norvegicus	26 kDa	0.93	0.081	1
775	UniRef100_D1HYH8	2	Whole genome shotgun sequence of line PN40024, scaffold_20.assembly12x (Fragment)	Vitis vinifera	30 kDa	0.93	0.035	1	UniRef100_UPI00019831A2
776	UniRef100_Q4FMR5	1	30S ribosomal protein S6	Candidatus Pelagibacter ubique	14 kDa	0.93	0.083	1
777	UniRef100_A8REW5	1	Putative uncharacterized protein	Eubacterium dolichum DSM 3991	104 kDa	0.93	0.013	1
778	UniRef100_P14804	1	Glucoamylase	Neurospora crassa	66 kDa	0.93	0.034	1
779	UniRef100_Q0URL3	1	Putative uncharacterized protein	Phaeosphaeria nodorum	34 kDa	0.92	0.038	1
780	UniRef100_B4RV95	1	Serine hydroxymethyltransferase	Alteromonas macleodii 'Deep ecotype'	45 kDa	0.92	0.026	1
781	UniRef100_B6ZHC1	1	PR-5 protein (Fragment)	Glycine max	13 kDa	0.92	0.12	1
782	UniRef100_B9RC66	1	Osmotin, putative	Ricinus communis	24 kDa	0.92	0.062	1
783	UniRef100_P81370	1	Thaumatin-like protein	Actinidia deliciosa	24 kDa	0.92	0.04	1
784	UniRef100_Q16KW4	1	Trypsin	Aedes aegypti	30 kDa	0.92	0.059	1
785	UniRef100_Q9FF04	1	Osmotin-like protein (Fragment)	Fagus sylvatica	14 kDa	0.92	0.1	1
786	UniRef100_A1WRT4	1	Porin, gram-negative type	Verminephrobacter eiseniae EF01-2	41 kDa	0.92	0.028	1
787	UniRef100_Q8J1D1	2	Beta-tubulin (Fragment)	Nephromopsis laureri	26 kDa	0.92	0.055	1	UniRef100_Q9UVS2
788	UniRef100_A6PUQ8	1	ROK family protein (Fragment)	Victivallis vadensis ATCC BAA-548	39 kDa	0.92	0.022	1
789	UniRef100_C7ZBE2	1	Putative uncharacterized protein	Nectria haematococca mpVI 77-13-4	45 kDa	0.92	0.034	1
790	UniRef100_C9SU67	1	Pectin lyase	Verticillium albo-atrum VaMs.102	42 kDa	0.92	0.028	1
791	UniRef100_B7G0M9	5	ATP synthase gamma chain	Phaeodactylum tricornutum CCAP 1055/1	40 kDa	0.92	0.035	1	UniRef100_B8C0W4	UniRef100_Q06908	UniRef100_Q41075	UniRef100_Q84XB4
792	UniRef100_C1YMY4	1	Glutamate dehydrogenase (NADP)	Nocardiopsis dassonvillei subsp. dassonvillei DSM 43111	50 kDa	0.92	0.026	1
793	UniRef100_A1C700	23	V-type ATPase, B subunit, putative	Aspergillus clavatus	56 kDa	0.92	0.032	1	UniRef100_A1DHM8	UniRef100_A2QC23	UniRef100_A6RAG3	UniRef100_B0XTB8	UniRef100_B2W5T6	UniRef100_B6HT76	UniRef100_B6QC04	UniRef100_B6QC05	UniRef100_B8M3M0	UniRef100_B8NGL6	UniRef100_C0SC96	UniRef100_C1H5U3	UniRef100_C4JV88	UniRef100_C5FPG2	UniRef100_C5GT74	UniRef100_C5P0D5	UniRef100_C6HDT8	UniRef100_C8V1R1	UniRef100_Q0CYD4	UniRef100_Q0UKR3	UniRef100_Q9P495	UniRef100_UPI0000D87261
794	UniRef100_A2RB25	33	Contig An18c0170, complete genome	Aspergillus niger CBS 513.88	52 kDa	0.92	0.037	1	UniRef100_A4QT56	UniRef100_A6SQ02	UniRef100_A7E759	UniRef100_A7TK90	UniRef100_A8NWT5	UniRef100_B2B370	UniRef100_B2WEF9	UniRef100_B5VS09	UniRef100_B6H1D6	UniRef100_B6Q3R5	UniRef100_B8M6P8	UniRef100_B8NNC8	UniRef100_C0S3D4	UniRef100_C1G159	UniRef100_C4JYS9	UniRef100_C4R7G3	UniRef100_C5DJG4	UniRef100_C5G9T2	UniRef100_C5JUI3	UniRef100_C5P9X9	UniRef100_C7ZKW8	UniRef100_C8V492	UniRef100_P33297	UniRef100_Q0CTK0	UniRef100_Q0UJ09	UniRef100_Q2H177	UniRef100_Q2UNB2	UniRef100_Q6C9Q7	UniRef100_Q6CMD0	UniRef100_Q6FY57	UniRef100_Q756K0	UniRef100_UPI000023F6F5
795	UniRef100_A4QVR2	9	Histone H2A.Z	Magnaporthe grisea	15 kDa	0.92	0.099	1	UniRef100_A6RQT5	UniRef100_A7E9S2	UniRef100_B2ASZ5	UniRef100_B2VUF8	UniRef100_C9SLL0	UniRef100_Q0UG93	UniRef100_Q2GUP0	UniRef100_Q873G4
796	UniRef100_A6C5L5	5	Probable D-arabino 3-hexulose 6-phosphate formaldehyde lyase (Hps-2)	Planctomyces maris DSM 8797	17 kDa	0.92	0.092	1	UniRef100_A7IF20	UniRef100_C1ZKB6	UniRef100_Q4PLP2	UniRef100_Q4PLP9
797	UniRef100_B9GKL2	2	Predicted protein	Populus trichocarpa	24 kDa	0.92	0.08	1	UniRef100_B9NDL0
798	UniRef100_P07505	1	Superoxide dismutase [Cu-Zn], chloroplastic	Spinacia oleracea	23 kDa	0.92	0.13	1
799	UniRef100_Q5PYQ1	1	Chloroplast chlorophyll A/B binding protein (Fragment)	Manihot esculenta	26 kDa	0.92	0.07	1
800	UniRef100_Q9F3Q2	1	Secreted extracellular small neutral protease	Streptomyces coelicolor	19 kDa	0.92	0.071	1
801	UniRef100_B2WE48	1	Exo-beta 1,3 glucanase	Pyrenophora tritici-repentis Pt-1C-BFP	84 kDa	0.92	0.017	1
802	UniRef100_Q35784	3	Sorghum bicolor URF209	Sorghum bicolor	24 kDa	0.92	0.053	1	UniRef100_Q6R9J5	UniRef100_Q8HCR5
803	UniRef100_Q4SSF0	2	Chromosome undetermined SCAF14457, whole genome shotgun sequence	Tetraodon nigroviridis	118 kDa	0.92	0.0092	1	UniRef100_UPI00017B45B8
804	UniRef100_UPI0001AED5D2		chitinase III	Streptomyces roseosporus NRRL 11379	61 kDa	0.92	0.027	1
805	UniRef100_A7THA4	2	ATP synthase subunit beta	Vanderwaltozyma polyspora DSM 70294	54 kDa	0.92	0.03	1	UniRef100_A7TPX3
806	UniRef100_A7IKP0	1	RNA methyltransferase, TrmH family, group 3	Xanthobacter autotrophicus Py2	30 kDa	0.92	0.056	1
807	UniRef100_A9V5E8	1	Glyceraldehyde-3-phosphate dehydrogenase	Monosiga brevicollis	38 kDa	0.92	0.04	1
808	UniRef100_Q2GWE1	1	NADP-specific glutamate dehydrogenase	Chaetomium globosum	49 kDa	0.92	0.04	1
809	2001393963	1	ABC-type antimicrobial peptide transport system, permease component [Soil: Diversa Silage]		13 kDa	0.92	0.21	1
810	UniRef100_B1Q486	10	Putative aconitase	Capsicum chinense	108 kDa	0.92	0.015	1	UniRef100_B9MXB0	UniRef100_B9SDW5	UniRef100_B9SXB6	UniRef100_D1I6C4	UniRef100_P49608	UniRef100_Q42560	UniRef100_Q84TR4	UniRef100_Q9FVE9	UniRef100_Q9SIB9
811	UniRef100_B2WBU9	2	60S ribosomal protein L21-A	Pyrenophora tritici-repentis Pt-1C-BFP	18 kDa	0.92	0.094	1	UniRef100_Q0V4S8
812	UniRef100_Q5FZN9	3	Alkaline serine protease	Lecanicillium psalliotae	40 kDa	0.92	0.05	1	UniRef100_Q68GV9	UniRef100_UPI0001BE63F6
813	UniRef100_A5ABL8	7	Similarity to several oxidoreductases	Aspergillus niger CBS 513.88	30 kDa	0.92	0.043	1	UniRef100_B2VYG9	UniRef100_B6HAM2	UniRef100_C7ZNQ6	UniRef100_C8VG65	UniRef100_Q4P3R1	UniRef100_UPI000023E197
814	UniRef100_B8B3Z3	3	Putative uncharacterized protein	Oryza sativa Indica Group	75 kDa	0.92	0.015	1	UniRef100_B9FS68	UniRef100_Q69TI3
815	UniRef100_P02723	1	ADP,ATP carrier protein	Neurospora crassa	34 kDa	0.92	0.035	1
816	UniRef100_A1C9H8	12	Mitochondrial cytochrome b2, putative	Aspergillus clavatus	56 kDa	0.92	0.024	1	UniRef100_A1D9X0	UniRef100_A2R2X1	UniRef100_B0YEQ5	UniRef100_B8NQY6	UniRef100_C8V6A6	UniRef100_Q0CND5	UniRef100_Q0V0C0	UniRef100_Q2UAT2	UniRef100_Q4WA03	UniRef100_Q5B6C9	UniRef100_UPI000023D1C8
817	UniRef100_A8P9E0	4	Putative uncharacterized protein	Coprinopsis cinerea okayama7#130	126 kDa	0.92	0.01	1	UniRef100_B0DEZ4	UniRef100_B8PEP9	UniRef100_UPI000187CA38
818	UniRef100_C3K0T0	5	Putative outer membrane porin A protein	Pseudomonas fluorescens SBW25	35 kDa	0.92	0.064	1	UniRef100_P37726	UniRef100_Q51721	UniRef100_Q51780	UniRef100_Q9S4R5
819	UniRef100_A0MVQ2	20	30S ribosomal protein S7 (Fragment)	Pseudomonas	15 kDa	0.92	0.088	1	UniRef100_A0MVQ4	UniRef100_A0MVQ9	UniRef100_A0MVR0	UniRef100_A0MVR1	UniRef100_A0MVR2	UniRef100_A0MVR5	UniRef100_A6UZI4	UniRef100_B2HUQ3	UniRef100_B7GYM9	UniRef100_C0VFX8	UniRef100_C6RKW5	UniRef100_D0S0P6	UniRef100_D0S8Y3	UniRef100_Q1IFX0	UniRef100_Q3K5Y4	UniRef100_Q48D32	UniRef100_Q4K529	UniRef100_Q6FDS7	UniRef100_UPI000039630F
820	UniRef100_A1JS11	50	30S ribosomal protein S5	Yersinia	18 kDa	0.92	0.072	1	UniRef100_A1T0C5	UniRef100_A3N374	UniRef100_A3WQ80	UniRef100_A3Y4K8	UniRef100_A4WFB1	UniRef100_A6TEV5	UniRef100_A6VLK5	UniRef100_A7FNL7	UniRef100_A7JW22	UniRef100_A7MPG7	UniRef100_A8AQJ8	UniRef100_A8GKI0	UniRef100_B2VK79	UniRef100_B6EPU2	UniRef100_B7VLE0	UniRef100_B8F6Q4	UniRef100_B9CXB6	UniRef100_C1MCZ4	UniRef100_C4RXW2	UniRef100_C4UHB8	UniRef100_C5BGK8	UniRef100_C6AL74	UniRef100_C6C890	UniRef100_C6CHB9	UniRef100_C6EGG3	UniRef100_C6UFQ3	UniRef100_C8QHE3	UniRef100_C9PSL6	UniRef100_C9R2D9	UniRef100_D0FWU2	UniRef100_Q0I145	UniRef100_Q1YW64	UniRef100_Q1ZBR9	UniRef100_Q1ZJG7	UniRef100_Q2NQN9	UniRef100_Q32B48	UniRef100_Q488Z6	UniRef100_Q4QMA4	UniRef100_Q5E897	UniRef100_Q5QXW2	UniRef100_Q65QX2
821	UniRef100_A8N392	1	Putative uncharacterized protein	Coprinopsis cinerea okayama7#130	94 kDa	0.92	0.019	1
822	UniRef100_B0Y6S9	3	3-ketoacyl-coA thiolase peroxisomal A	Aspergillus fumigatus	44 kDa	0.92	0.036	1	UniRef100_B6QQF3	UniRef100_B8LW27
823	UniRef100_A4KU98	2	PEAt1	Alternaria tenuissima	23 kDa	0.92	0.063	1	UniRef100_Q0UKB5
824	UniRef100_Q2XPZ4	1	Eukaryotic ADP/ATP carrier	Cryptococcus neoformans var. grubii	35 kDa	0.92	0.041	1
825	UniRef100_B2GLR0	1	Dethiobiotin synthetase	Kocuria rhizophila DC2201	34 kDa	0.92	0.027	1
826	2001296779	21	Ribosomal protein S5 [Soil: Diversa Silage]		17 kDa	0.92	0.097	1	UniRef100_A0NWG6	UniRef100_A3WVT7	UniRef100_A4U4F8	UniRef100_A5ELL0	UniRef100_A7IPQ3	UniRef100_A8IAP6	UniRef100_B2IK79	UniRef100_B3QBW3	UniRef100_B6JEY2	UniRef100_B6R0X1	UniRef100_B8ELE6	UniRef100_B9QYN6	UniRef100_Q07KN5	UniRef100_Q134U6	UniRef100_Q1QN13	UniRef100_Q211G5	UniRef100_Q2IXP3	UniRef100_Q2W2K8	UniRef100_Q3SSU9	UniRef100_Q89JA1
827	UniRef100_A0PCX2	3	Epl1 protein	Trichoderma atroviride	14 kDa	0.92	0.08	1	UniRef100_A0PCX3	UniRef100_Q09SZ6
828	UniRef100_Q43621	2	Glutathione reductase, cytosolic	Pisum sativum	54 kDa	0.92	0.03	1	UniRef100_Q9M3T6
829	UniRef100_A2WDF0	29	50S ribosomal protein L14	Burkholderia dolosa AUO158	18 kDa	0.92	0.074	1	2001245764	UniRef100_A2VTN6	UniRef100_A4VHP0	UniRef100_A4XZ80	UniRef100_A9ADK3	UniRef100_B0U5K9	UniRef100_B1YRN9	UniRef100_B2I8H9	UniRef100_B3R7R3	UniRef100_B6BV68	UniRef100_B7V654	UniRef100_B9Z8E1	UniRef100_C1DAS7	UniRef100_C1DKM3	UniRef100_C6P5M6	UniRef100_C6WTE3	UniRef100_C6X8U1	UniRef100_Q1BRV8	UniRef100_Q2NZZ5	UniRef100_Q3BWX3	UniRef100_Q3SLN9	UniRef100_Q46WF4	UniRef100_Q47J93	UniRef100_Q48D46	UniRef100_Q4K543	UniRef100_Q5P322	UniRef100_UPI000039630A	UniRef100_UPI0000E87D97
830	UniRef100_B2VRW7	1	Carboxypeptidase cpdS	Pyrenophora tritici-repentis Pt-1C-BFP	61 kDa	0.91	0.02	1
831	UniRef100_B2W1Z4	1	Cytochrome b-c1 complex subunit 2, mitochondrial	Pyrenophora tritici-repentis Pt-1C-BFP	49 kDa	0.91	0.037	1
832	UniRef100_B2W4A6	1	Mitochondrial-processing peptidase subunit beta	Pyrenophora tritici-repentis Pt-1C-BFP	52 kDa	0.91	0.026	1
833	UniRef100_C0SE56	8	Mitochondrial-processing peptidase subunit beta	Paracoccidioides brasiliensis Pb03	53 kDa	0.91	0.04	1	UniRef100_C1GHN0	UniRef100_C1H3S4	UniRef100_C5GK86	UniRef100_C5P871	UniRef100_C8VR88	UniRef100_C9SQK2	UniRef100_UPI0000D86AD1
834	UniRef100_C9SUS9	1	Malate dehydrogenase	Verticillium albo-atrum VaMs.102	34 kDa	0.91	0.067	1
835	UniRef100_B0T2D6	5	30S ribosomal protein S8	Caulobacter sp. K31	14 kDa	0.91	0.091	1	UniRef100_B8H4E8	UniRef100_C6QHV7	UniRef100_D0XVU8	UniRef100_Q28UU0
836	UniRef100_A6VC67	3	50S ribosomal protein L25	Pseudomonas aeruginosa PA7	22 kDa	0.91	0.064	1	UniRef100_B7V0L7	UniRef100_Q02G03
837	UniRef100_B1LV99	2	Formaldehyde-activating enzyme	Methylobacterium radiotolerans JCM 2831	18 kDa	0.91	0.065	1	UniRef100_B1ZIC8
838	UniRef100_Q6L8H5	1	Nucleoside diphosphate kinase	Codonopsis lanceolata	16 kDa	0.91	0.11	1
839	UniRef100_Q8GW78	3	Putative uncharacterized protein At4g12060/F16J13_130	Arabidopsis thaliana	27 kDa	0.91	0.041	1	UniRef100_Q8LBJ1	UniRef100_Q9SZ71
840	UniRef100_Q9HEZ3	2	Prepropenicillopepsin-JT3	Penicillium janthinellum	41 kDa	0.91	0.03	1	UniRef100_UPI0000111EB0
841	UniRef100_Q9C643	2	Xylan endohydrolase isoenzyme, putative	Arabidopsis thaliana	102 kDa	0.91	0.015	1	UniRef100_Q9SM08
842	UniRef100_A2QBM7	6	Similarity to high-affinity glucose transporter HGT1 - Kluyveromyces lactis	Aspergillus niger CBS 513.88	60 kDa	0.91	0.029	1	UniRef100_B6Q4P3	UniRef100_B8N7P7	UniRef100_C5J3S1	UniRef100_Q0CZ52	UniRef100_Q6JJ77
843	UniRef100_A3PG28	1	Aminoglycoside phosphotransferase	Rhodobacter sphaeroides ATCC 17029	36 kDa	0.91	0.032	1
844	UniRef100_C9SG69	1	Peptidyl-prolyl cis-trans isomerase B	Verticillium albo-atrum VaMs.102	23 kDa	0.91	0.067	1
845	UniRef100_C6RLI2	1	Acriflavine resistance protein E	Acinetobacter radioresistens	44 kDa	0.91	0.027	1
846	UniRef100_C6RQ42	2	Rickettsia 17 kDa surface antigen family protein	Acinetobacter radioresistens SK82	8 kDa	0.91	0.22	1	UniRef100_D0T670
847	UniRef100_UPI000023CFAF	6	VATB_NEUCR Vacuolar ATP synthase subunit B (V-ATPase B subunit) (Vacuolar proton pump B subunit) (V-ATPase 57 kDa subunit)	Gibberella zeae PH-1	57 kDa	0.91	0.029	1	UniRef100_B9WM00	UniRef100_C4YM24	UniRef100_C5M3K4	UniRef100_P22550	UniRef100_Q59PT0
848	UniRef100_B6V3C1	3	Hexokinase 2	Cucumis melo	54 kDa	0.91	0.032	1	UniRef100_B9RKH7	UniRef100_Q9FVD3
849	UniRef100_A0DIF7	2	Chromosome undetermined scaffold_51, whole genome shotgun sequence	Paramecium tetraurelia	18 kDa	0.91	0.074	1	UniRef100_O00845
850	UniRef100_A0SXL6	40	Elongation factor 2	Callithrix jacchus	95 kDa	0.91	0.01	1	UniRef100_A2CE51	UniRef100_B4DPU3	UniRef100_B5X1W2	UniRef100_C0H9N2	UniRef100_C0HAQ6	UniRef100_C0HBD9	UniRef100_P05086	UniRef100_P05197	UniRef100_P09445	UniRef100_P13639	UniRef100_P58252	UniRef100_Q3SYU2	UniRef100_Q3TJZ1	UniRef100_Q3TK17	UniRef100_Q3TLB1	UniRef100_Q3TW58	UniRef100_Q3TWX1	UniRef100_Q3TX47	UniRef100_Q3UBL9	UniRef100_Q3UDC8	UniRef100_Q3UMI7	UniRef100_Q3UZ14	UniRef100_Q5FVX0	UniRef100_Q60423	UniRef100_Q6P3J5	UniRef100_Q6P3N8	UniRef100_Q7ZVM3	UniRef100_Q7ZXP8	UniRef100_Q8BMA8	UniRef100_Q8C153	UniRef100_Q90705	UniRef100_UPI00005A3E37	UniRef100_UPI00006A1660	UniRef100_UPI0000D92E57	UniRef100_UPI0000EB1AEF	UniRef100_UPI0000EC9EF2	UniRef100_UPI0000F2AE24	UniRef100_UPI00016E8664	UniRef100_UPI000179638C
851	UniRef100_A4R2S1	1	Putative uncharacterized protein	Magnaporthe grisea	17 kDa	0.91	0.087	1
852	UniRef100_A8PB71	1	Putative uncharacterized protein	Coprinopsis cinerea okayama7#130	37 kDa	0.91	0.061	1
853	UniRef100_B0CPN8	1	Predicted protein	Laccaria bicolor S238N-H82	16 kDa	0.91	0.13	1
854	UniRef100_Q2U7A3	1	Actin	Aspergillus oryzae	42 kDa	0.91	0.043	1
855	UniRef100_Q5KIC5	1	Ribosomal protein L18	Filobasidiella neoformans	21 kDa	0.91	0.058	1
856	UniRef100_Q9BJD3	1	Major plasmodial myosin heavy chain	Physarum polycephalum	247 kDa	0.91	0.0051	1
857	UniRef100_A0BPS6	1	Chromosome undetermined scaffold_12, whole genome shotgun sequence	Paramecium tetraurelia	19 kDa	0.91	0.08	1
858	UniRef100_A4A5W4	1	Outer membrane efflux protein	Congregibacter litoralis KT71	56 kDa	0.91	0.016	1
859	UniRef100_B4DE59	1	cDNA FLJ60424, highly similar to Junction plakoglobin	Homo sapiens	63 kDa	0.91	0.021	1
860	UniRef100_Q24SY1	1	Putative phosphoenolpyruvate synthase	Desulfitobacterium hafniense Y51	65 kDa	0.91	0.023	1
861	UniRef100_A6SBW4	2	Putative uncharacterized protein	Botryotinia fuckeliana B05.10	55 kDa	0.91	0.029	1	UniRef100_A7F806
862	UniRef100_A9T844	6	Predicted protein	Physcomitrella patens subsp. patens	67 kDa	0.91	0.02	1	UniRef100_B9N6A4	UniRef100_B9SPP7	UniRef100_D1HHY7	UniRef100_Q8RWG1	UniRef100_UPI0001983037
863	UniRef100_A1BQJ2	1	Aspartic proteinase (Fragment)	Cucumis sativus	21 kDa	0.91	0.11	1
864	UniRef100_A5G1G2	1	60 kDa chaperonin	Acidiphilium cryptum JF-5	58 kDa	0.91	0.031	1
865	UniRef100_A6S3D3	2	Putative uncharacterized protein	Botryotinia fuckeliana B05.10	80 kDa	0.91	0.02	1	UniRef100_A7EPZ2
866	UniRef100_A8N212	1	6-phosphogluconate dehydrogenase, decarboxylating	Coprinopsis cinerea okayama7#130	54 kDa	0.91	0.024	1
867	UniRef100_A8N3X1	3	Putative uncharacterized protein	Coprinopsis cinerea okayama7#130	51 kDa	0.91	0.025	1	UniRef100_B0DV38	UniRef100_Q8TGE4
868	UniRef100_B0CNH9	1	Enolase	Laccaria bicolor S238N-H82	47 kDa	0.91	0.034	1
869	UniRef100_B9TE04	2	Aldehyde dehydrogenase, putative	Ricinus communis	12 kDa	0.91	0.11	1	UniRef100_Q5EBY6
870	UniRef100_O03986	7	Heat shock protein	Arabidopsis thaliana	80 kDa	0.91	0.02	1	UniRef100_P51818	UniRef100_P55737	UniRef100_Q14TB1	UniRef100_Q6R0J1	UniRef100_Q6UJX6	UniRef100_Q8H158
871	UniRef100_Q08291	2	Geranyltranstransferase	Geobacillus stearothermophilus	32 kDa	0.91	0.077	1	UniRef100_Q75TG5
872	UniRef100_Q7Z948	2	Xylanase	Volvariella volvacea	39 kDa	0.91	0.038	1	UniRef100_Q9HGX1
873	UniRef100_UPI000187EB8E		hypothetical protein MPER_15891	Moniliophthora perniciosa FA553	20 kDa	0.91	0.055	1
874	UniRef100_A0ZNJ6	13	Alpha-Arabinosidase1	Pyrus communis	74 kDa	0.91	0.016	1	UniRef100_B2BMP6	UniRef100_B3F8C3	UniRef100_B3F8C4	UniRef100_B9HDS0	UniRef100_B9IHI1	UniRef100_B9SCF3	UniRef100_B9VSZ9	UniRef100_D1IGX5	UniRef100_Q1HGK8	UniRef100_Q76LU3	UniRef100_Q7X9G7	UniRef100_Q9SG80
875	UniRef100_B0CSS9	1	Predicted protein	Laccaria bicolor S238N-H82	29 kDa	0.91	0.056	1
876	UniRef100_B0DAX7	1	Predicted protein	Laccaria bicolor S238N-H82	32 kDa	0.91	0.041	1
877	UniRef100_Q2BJ78	1	Sensor protein	Neptuniibacter caesariensis	146 kDa	0.91	0.015	1
878	UniRef100_A3N317	59	50S ribosomal protein L1	Actinobacillus pleuropneumoniae	24 kDa	0.91	0.052	1	UniRef100_A4A6A3	UniRef100_A4N2F1	UniRef100_A4VHM0	UniRef100_A4W5A4	UniRef100_A4XZA0	UniRef100_A5U9X7	UniRef100_A5VXN7	UniRef100_A6TGN6	UniRef100_A7JSE4	UniRef100_A7MQP8	UniRef100_A7ZUJ7	UniRef100_A8AKU2	UniRef100_A9MHF5	UniRef100_B0BSE7	UniRef100_B0KK57	UniRef100_B0QWW7	UniRef100_B1ES90	UniRef100_B1JE12	UniRef100_B2VG93	UniRef100_B3PK27	UniRef100_B5F0W4	UniRef100_B5JXS4	UniRef100_B5XYF8	UniRef100_B6X9R0	UniRef100_B7S353	UniRef100_B7UPD9	UniRef100_B8F7D3	UniRef100_B9CWN3	UniRef100_C1MGC3	UniRef100_C2B8P5	UniRef100_C6AQN1	UniRef100_C6CN95	UniRef100_C6DHR2	UniRef100_C7BI82	UniRef100_C8N6F2	UniRef100_C8QHG7	UniRef100_C8QUX4	UniRef100_C9QV93	UniRef100_C9R6X7	UniRef100_C9XTC6	UniRef100_D0FN36
879	UniRef100_A3RXR6	15	SSU ribosomal protein S2P	Ralstonia solanacearum	27 kDa	0.91	0.04	1	UniRef100_A4G4S1	UniRef100_A6SZQ1	UniRef100_B2UB06	UniRef100_B3R2B7	UniRef100_C3X1F1	UniRef100_C3X7R2	UniRef100_C6BHM4	UniRef100_C6NZY2	UniRef100_Q0KA16	UniRef100_Q1LNF8	UniRef100_Q2YBA7	UniRef100_Q470D7	UniRef100_Q47F92	UniRef100_Q8XZJ1
880	UniRef100_A5AX39	14	Putative uncharacterized protein	Vitis vinifera	48 kDa	0.91	0.022	1	UniRef100_B7FHT0	UniRef100_B9GPQ6	UniRef100_B9H5U1	UniRef100_C6T9R8	UniRef100_C6TG31	UniRef100_D1J561	UniRef100_P09044	UniRef100_P12859	UniRef100_P12860	UniRef100_P25857	UniRef100_Q38IX0	UniRef100_Q8VXD7	UniRef100_UPI0001985199
881	UniRef100_P11402	2	ATP synthase delta chain, chloroplastic	Spinacia oleracea	28 kDa	0.91	0.054	1	UniRef100_Q39409
882	UniRef100_O94753	4	Versatile peroxidase VPL2	Pleurotus eryngii	38 kDa	0.9	0.025	1	UniRef100_Q4QZ27	UniRef100_Q8J1S4	UniRef100_Q9UR19
[truncated: 84 more columns]

## Sheet: Quantitative information
Supplementary Table S1. Quantitative cluster information based on normalized spectral abundance factors (NSAFs).
Normalized spectral abundance factors (NSAF) of the protein cluster at the respective sampling times and from the different litter types collected in Klausenleopoldsdorf, Ossiach and Schottenwald are provided.
Grey shaded columns show NSAFs in control samples. Red shaded columns show NSAFs in heat treated samples. Blue shaded columns show NSAFs in frost treated samples.
					1st Sampling									2nd Sampling
					Control			Heat treatment			Frost treatment			Control			Heat treatment			Frost treatment
#	Leading accession number	Proteins in cluster	Identified Proteins	Representative source organism	Klausenleopoldsdorf	Ossiach	Schottenwald	Klausenleopoldsdorf	Ossiach	Schottenwald	Klausenloepoldsdorf	Ossiach	Schottenwald	Klausenleopoldsdorf	Ossiach	Schottenwald	Klausenleopoldsdorf	Ossiach	Schottenwald	Klausenloepoldsdorf	Ossiach	Schottenwald
1	UniRef100_Q29V96	2	ATP synthase subunit beta (Fragment)	Fagus grandifolia	0.036064	0.0301859	0.0155039	0.0322426	0.0256738	0.0204748	0.0310127	0.0284053	0.0194639	0.0280335	0.0258789	0.0191717	0.0281758	0.0218222	0.0174837	0.0254808	0.0269626	0.0172214
2	UniRef100_Q3U452	1	ATP synthase subunit alpha	Mus musculus	0.0118547	0.00997948	0.0102192	0.0111628	0.00856159	0.00747812	0.0115629	0.013072	0.00829373	0.0122168	0.0141778	0.00787744	0.00853052	0.0104609	0.00838119	0.00814317	0.00894813	0.00933223
3	UniRef100_C5XGT6	2	ATP synthase subunit beta	Sorghum bicolor	0.015656	0.0130245	0.013857	0.0144088	0.00997676	0.0130713	0.0115493	0.0121862	0.0109532	0.0121481	0.0132171	0.00652766	0.0106033	0.0113774	0.00781323	0.0107544	0.0101955	0.00736139
4	UniRef100_A5PFH1	14	Ribulose bisphosphate carboxylase large chain (Fragment)	Brenierea insignis	0.0095274	0.00320814	0.00895963	0.00736111	0.00917442	0.00601005	0.0115055	0.00350192	0.0111092	0.0183277	0.0101284	0.012193	0.0144734	0.00934141	0.00979757	0.0130891	0.010654	0.0100002
5	UniRef100_B2A947	1	ATP synthase subunit alpha	Podospora anserina	0.00732729	0.0111029	0.00516797	0.00796113	0.00694557	0.00953324	0.00536022	0.00706976	0.00961182	0.00377555	0.00547702	0.00486899	0.00461358	0.0056576	0.0056513	0.00440409	0.00737437	0.00399336
6	UniRef100_A1CM60	12	Actin	Aspergillus clavatus	0.00904845	0.00522319	0.00850922	0.00898851	0.00980236	0.0122312	0.00756494	0.00712688	0.00994786	0.00745987	0.0154595	0.0114528	0.00837153	0.0148286	0.0109666	0.00887934	0.0130094	0.0075145
7	UniRef100_Q0U1E5	1	Putative uncharacterized protein	Phaeosphaeria nodorum	0.00444987	0.00349625	0.00511462	0.00601664	0.00321375	0.00608195	0.0024802	0.00490683	0.00380503	0.00326101	0.00354794	0.00175226	0.00391367	0.0052356	0.00381338	0.00305669	0.00398086	0.0046707
8	UniRef100_Q06Z74	1	Fibrillin 4	Coffea canephora	0.0173391	0.0157641	0.00978351	0.012057	0.0169054	0.0114847	0.0130467	0.0114718	0.0109177	0.0128655	0.0103686	0.0107538	0.0124771	0.0122405	0.00936118	0.0131016	0.00698023	0.0100798
9	UniRef100_B7T325	1	ATP synthase subunit alpha	Geranium carolinianum	0.01297	0.0110863	0.0056294	0.0112735	0.011889	0.00283212	0.0100094	0.0132017	0.00349001	0.00658025	0.0107389	0.00795559	0.010051	0.00880391	0.00615588	0.00890929	0.0110451	0.00652487
10	UniRef100_O48657	1	Chlorophyll a/b-binding protein	Fagus crenata	0.0114281	0.0076963	0.0179117	0.00993332	0.0082535	0.0162203	0.0127392	0.00840108	0.0159906	0.00942172	0.00683382	0.0135004	0.00959414	0.00672299	0.0117521	0.00654178	0.00575075	0.0110725
11	UniRef100_A6R9F3	4	ATP synthase subunit beta	Ajellomyces capsulatus NAm1	0.00866957	0.00778476	0.0090588	0.0117221	0.00521773	0.0100263	0.00805354	0.00743544	0.00943505	0.00555917	0.00345619	0.00682778	0.00693173	0.0051002	0.00817246	0.00330849	0.0038779	0.00699986
12	UniRef100_B6HAB7	5	Histone H4	Penicillium chrysogenum Wisconsin 54-1255	0.0262675	0.0151629	0.028231	0.0260935	0.0203258	0.024855	0.0282355	0.0165514	0.0210025	0.030937	0.0448788	0.0265978	0.0270027	0.0331132	0.0202593	0.0257766	0.0339895	0.0245413
13	UniRef100_B2VRU6	1	Elongation factor 1-alpha	Pyrenophora tritici-repentis Pt-1C-BFP	0.00220059	0.0033345	0.00517363	0.00478191	0.00595986	0.00937015	0.0036796	0.00363986	0.00923744	0.000907124	0.00263184	0.00682405	0.00633411	0.00485467	0.0076376	0.00151162	0.00553683	0.00719592
14	UniRef100_O98447	4	ClpC protease	Spinacia oleracea	0.00108253	0.00382744	0.00254505	0.00282282	0.00293181	0.00102432	0.00271514	0.00179054	0.00113604	0.00312367	0.00323669	0.00239781	0.00311592	0.00238814	0.0020873	0.00408985	0.00326846	0.00196659
15	UniRef100_A9PFI8	1	Predicted protein	Populus trichocarpa	0.00953888	0.00412972	0.00640745	0.00710677	0.00885742	0.00386826	0.0056964	0.00751316	0.0057202	0.0078642	0.00325949	0.00603676	0.0068641	0.00120249	0.00420401	0.0046803	0.00548581	0.00495112
16	UniRef100_D1HAI0	2	Whole genome shotgun sequence of line PN40024, scaffold_72.assembly12x (Fragment)	Vitis vinifera	0.00889974	0.0123617	0.00523086	0.0106366	0.0132567	0.00631587	0.00930077	0.0110404	0.00622642	0.00825443	0.0119743	0.0019713	0.00560366	0.0107984	0.00343204	0.0084059	0.00895693	0.00485034
17	UniRef100_P25856	1	Glyceraldehyde-3-phosphate dehydrogenase A, chloroplastic	Arabidopsis thaliana	0.00634893	0.0102617	0	0.011037	0.00687792	0.0012015	0.00955442	0.00420054	0.000888365	0.00942172	0.00911176	0.0033751	0.00730982	0.0100845	0.00391738	0.00959462	0.00894562	0.00461354
18	UniRef100_B2AZV9	1	Malate dehydrogenase	Podospora anserina	0.004503	0.00454886	0.0056462	0.00913273	0.00487819	0.00568114	0.00878437	0.00165514	0.0105013	0.00989983	0.00897577	0.00930922	0.00540054	0.00264906	0.00926138	0.00515532	0.00755323	0.00654435
19	UniRef100_A9PGW0	4	Fructose-bisphosphate aldolase	Populus trichocarpa	0.00507914	0.00641358	0.00358235	0.00551851	0.00550233	0.00360451	0.00424641	0.00560072	0.00533019	0.00837486	0.0106304	0.00675019	0.00730982	0.00896398	0.00685541	0.0069779	0.0102236	0.00645896
20	UniRef100_P49317	1	Catalase isozyme 3	Nicotiana plumbaginifolia	0	0.00103243	0.00288335	0.000888346	0.00110718	0.00193413	0.00170892	0.00112697	0.0028601	0.00421296	0.00122231	0.00543308	0.00220632	0.000901864	0.00551777	0.00210614	0.00102859	0.00445601
21	UniRef100_A0ZZ15	69	Photosystem Q(B) protein	Gossypium barbadense	0.00284892	0.00287793	0.00133957	0.00371444	0.00154315	0.00269573	0.00238184	0.00314148	0.0049829	0.00352314	0.00170362	0.00757246	0.00922529	0.00502796	0.00878913	0.00684941	0.00430085	0.0103511
22	UniRef100_B5G500	3	GLP2	Gossypium barbadense	0.0146457	0.012329	0.0137729	0.0148518	0.0211546	0.0184775	0.0102038	0.0161496	0.0119541	0.010062	0.00875791	0.0108134	0.0122954	0.00861587	0.0131784	0.00670692	0.0073699	0.0124163
23	UniRef100_C6SVE5	1	Proteasome subunit beta type	Glycine max	0.00215809	0.0109003	0.00608845	0.00562746	0.0070137	0.00408408	0.00180427	0.00713912	0.00603936	0.00533763	0.0129051	0.00573622	0.00931767	0.00761746	0.00166447	0.00889458	0.00868783	0.00156821
24	UniRef100_B2VRS5	3	40S ribosomal protein S3-2	Pyrenophora tritici-repentis Pt-1C-BFP	0.00756143	0.00763843	0.00888853	0.00821553	0.00614358	0.00894352	0.00790215	0.00833791	0.00529011	0.0077924	0.00678244	0.00669944	0.00680143	0.00667244	0.00583189	0.00259704	0.00570752	0.00549463
25	UniRef100_A6QWM4	24	Tubulin beta chain	Ajellomyces capsulatus NAm1	0.00337473	0.00113637	0.00211575	0.00293333	0.00365591	0.00212884	0.00188096	0.00248086	0.00236102	0.00370967	0.00269072	0.00598004	0.00485686	0.00297797	0.00347043	0.0038636	0.00679284	0.00326973
26	UniRef100_A6RJ45	1	ATP-dependent RNA helicase eIF4A	Botryotinia fuckeliana B05.10	0.00379021	0.00255254	0.00594057	0.00549078	0.00410601	0.0071728	0.00211254	0.00278629	0.00618731	0.00520798	0.00604398	0.00447752	0.00545482	0.0033446	0.00682096	0.00260356	0.00381457	0.00550843
27	UniRef100_C7YN88	2	Predicted protein	Nectria haematococca mpVI 77-13-4	0.00263264	0.00797836	0.0123788	0	0	0.00498215	0	0	0.00184185	0.00217045	0	0.00466506	0	0	0.00609142	0.00904205	0.00264956	0.00956525
28	UniRef100_C7Z1Y0	1	Predicted protein	Nectria haematococca mpVI 77-13-4	0.00214581	0.00216766	0.00134529	0.00248686	0.00309947	0.00203042	0.00299	0.00315489	0.0030025	0.00117939	0.000855443	0.00190119	0.00154411	0.00315588	0.00441332	0.00343932	0.00143973	0.00259881
29	UniRef100_A6SDQ0	14	Histone H2B	Botryotinia fuckeliana B05.10	0.0142648	0.0144101	0.0134147	0.012399	0.0154534	0.0134977	0.0119261	0.0157297	0.0124749	0.0117604	0.0213254	0.0157983	0.0128311	0.0125877	0.0137525	0.00979876	0.0107674	0.0103657
30	UniRef100_B9RZ18	1	Putative uncharacterized protein	Ricinus communis	0.0118116	0.0102273	0.00952086	0.00733332	0.0109677	0.00798315	0.00846432	0.00930321	0.00354154	0.00417338	0.00605412	0.00149501	0.00607108	0.00744492	0.00260282	0.00695449	0.00849105	0.00122615
31	UniRef100_A0A365	28	Cytochrome b6	eudicotyledons	0.0127839	0.0107618	0.0100184	0.00925988	0.0115409	0.00604825	0.010688	0.0117473	0.00298129	0.0122961	0.00509641	0.00755106	0.00919923	0.00564047	0.00657323	0.0102451	0.0107217	0.0061931
32	UniRef100_A5BYV7	30	Putative uncharacterized protein	Vitis vinifera	0.00305211	0.00231239	0.00215267	0.00464258	0.00413301	0.00216599	0.00127586	0.00336553	0.00213531	0.00377441	0.00456279	0.00338022	0.00329441	0.00403991	0.00294249	0.00314482	0.00383965	0.00277233
33	UniRef100_D0F1P7	2	Aspartic proteinase 1	Castanea mollissima	0.00294056	0.005941	0.000921773	0.00170396	0.00424742	0	0.000819483	0.00432336	0.00205727	0.0032324	0.00351682	0.00173689	0.00141067	0.00259484	0.000755985	0.00269323	0.00394594	0.00142453
34	UniRef100_Q0G9X7	1	ATP synthase subunit alpha, chloroplastic	Daucus carota	0.00495893	0.00701319	0.00373073	0.00517238	0.00644652	0.00375381	0.00580427	0.00437453	0.00277548	0.00490598	0.00474459	0.00263617	0.00499577	0.00525109	0.00152986	0.0054502	0.00598895	0.00288278
35	UniRef100_B2W2Q2	3	Glyceraldehyde-3-phosphate dehydrogenase	Pyrenophora tritici-repentis Pt-1C-BFP	0.00596837	0.00452186	0.00982222	0.00518773	0.00161641	0.00988299	0.00124746	0.00164532	0.00521947	0.00123014	0.0053535	0.001322	0.00429479	0	0.00690481	0.00102494	0.00300336	0.00325275
36	UniRef100_C7IWD0	1	Os01g0791600 protein	Oryza sativa Japonica Group	0.00530697	0.0026805	0.00374303	0.00461284	0.00143729	0.00251079	0.00221844	0.00146298	0.00556928	0.00546907	0.00158675	0.00705297	0.00572828	0.00117076	0.00409309	0.00455681	0.00133527	0.00674868
37	UniRef100_A9PEL1	2	2-cys peroxiredoxin	Populus trichocarpa	0.00934638	0.0113299	0.00703152	0.00649913	0.0141752	0	0.0125024	0.00824493	0.00261556	0.00770549	0.0022356	0.00165618	0.00672558	0.00824753	0.00288342	0.00385211	0.00752515	0.00271667
38	UniRef100_A9PIG1	1	Putative uncharacterized protein	Populus trichocarpa	0.00554597	0.00373497	0.00695396	0.0080343	0.00801075	0.00174925	0.00618227	0.00407699	0.00258671	0.0030482	0.00221094	0.00327583	0.00266056	0.00489394	0.00142581	0.0050795	0.00372108	0.00537342
39	UniRef100_A6RNS7	2	ADP/ATP carrier protein	Botryotinia fuckeliana B05.10	0.00481951	0.00811431	0.00906459	0.00698189	0.00522106	0.00760057	0.00805868	0.00531442	0.00561969	0.00529783	0.00384266	0.00854018	0.0046241	0.00425288	0.00619521	0.00662121	0.00485048	0.00583694
40	UniRef100_C6TGD9	1	Putative uncharacterized protein	Glycine max	0.00737655	0.00620972	0.00346848	0.00641173	0.00532744	0.00348994	0.00616716	0.0054227	0.00430064	0.0060815	0.00735179	0.00435709	0.00530811	0.0065093	0.00189643	0.00506708	0.00618663	0.0044669
41	UniRef100_A5AS18	2	Whole genome shotgun sequence of line PN40024, scaffold_14.assembly12x	Vitis vinifera	0.00743106	0.00500449	0.00698822	0.0107652	0.00536681	0.00937528	0.00621273	0.00273139	0.00693187	0.00816858	0.00592489	0.0109732	0.00534733	0.0131148	0.0133731	0.00510453	0.00747881	0.0107998
42	UniRef100_Q0UYY5	1	Putative uncharacterized protein	Phaeosphaeria nodorum	0.00226843	0.00305537	0.00213325	0.00197173	0.00163829	0.00286193	0.00126434	0.00250137	0.00158703	0.00436374	0.0036173	0.00267978	0.00272057	0.00266898	0.00291594	0.00363585	0.00228301	0.00329678
43	UniRef100_A5B8T3	10	Putative uncharacterized protein	Vitis vinifera	0.00304749	0.00615704	0.00573175	0.00662221	0.0082535	0.00576722	0.00764354	0.00672086	0.00319811	0.00251246	0.00546706	0.00135004	0.00548237	0.00403379	0.00352564	0.00314006	0.00153353	0.004429
44	UniRef100_A1CTD1	11	6-phosphogluconate dehydrogenase, decarboxylating	Aspergillus clavatus	0.00284624	0.00383363	0.00446103	0.00412327	0.00411118	0.00359091	0.00475918	0.00418469	0.0033188	0.00312872	0.00340402	0.00336236	0.00204813	0.00251161	0.00292695	0.00325855	0.00286453	0.00275768
45	UniRef100_Q70CE9	1	Glucan endo-1,3-beta-glucosidase (Beta 1-3 glucanase) (Fragment)	Fagus sylvatica	0.0084274	0.00567548	0.00528346	0.00732513	0.00608638	0.0106323	0.00469715	0.00619521	0.00786129	0.00926381	0.0100789	0.00995559	0.00606429	0.0074366	0.00866638	0.00578893	0.00848156	0.0081652
46	UniRef100_UPI00017F0A65		PREDICTED: similar to histone cluster 1, H2ag	Sus scrofa	0.00114803	0	0.00107961	0.000997868	0	0.00108629	0.000959805	0	0.00321272	0.00189295	0.00137301	0.00305146	0.00165222	0.00405221	0.00354174	0.0023658	0.00231081	0.00333692
47	UniRef100_Q7S9Y8	1	Adenosylhomocysteinase	Neurospora crassa	0.0033597	0.00226261	0.00315949	0.00292026	0	0.00317903	0.00280887	0.00246981	0.001567	0.000923286	0	0.0029767	0.00241761	0	0.00172748	0.00230784	0.00225419	0.00325517
48	UniRef100_Q71E52	1	Cytochrome f (Fragment)	Fagus sylvatica	0.00989833	0.00599947	0.00186169	0.00688293	0.00643383	0.00561963	0.00662039	0.00436592	0.00415503	0.00652843	0.00473525	0.00350798	0.00569821	0.00349384	0.0030537	0.00543947	0.00199239	0.00287711
49	UniRef100_B9RVQ5	2	9-cis-epoxycarotenoid dioxygenase, putative	Ricinus communis	0.00469063	0.00379071	0.00176444	0.00244627	0.00508145	0.00177536	0.00235296	0.00413785	0.00196899	0.0030937	0	0.000831181	0.00270027	0	0	0.00257766	0.00188831	0.00136341
50	UniRef100_Q3SA43	1	Putative beta-1,3-glucanase (Fragment)	Fagus sylvatica	0.00575765	0	0.00360969	0.00500457	0	0.00363203	0.00641824	0	0.00268544	0.00632909	0	0.00510129	0.00414316	0	0.00740115	0.00527338	0	0.00557851
51	UniRef100_Q9AXQ2	1	Mitochondrial processing peptidase beta subunit	Cucumis melo	0.000952339	0	0	0.000827777	0	0	0.0015924	0.00105014	0.000666274	0.00314057	0.00227794	0.00253132	0.00205589	0.00252112	0.00146902	0.00196254	0.00287538	0.00138406
52	UniRef100_A0A331	61	Photosystem II CP43 chlorophyll apoprotein	Coffea arabica	0.00528188	0.00213427	0.00496712	0.00183641	0.00114439	0.00399828	0.00441591	0.00116486	0.00295624	0.00609641	0.0012634	0.00842356	0.00532112	0.00186436	0.00651799	0.0050795	0.00106316	0.00767632
53	UniRef100_P11221	2	Major outer membrane lipoprotein	Pseudomonas aeruginosa	0	0	0	0	0	0	0	0	0	0.0136667	0.0231299	0.0244787	0.00994055	0.019504	0.0191779	0.0170805	0.0166835	0.0100383
54	UniRef100_A6S509	1	ATP synthase subunit alpha	Botryotinia fuckeliana B05.10	0.000896319	0.00181089	0.00168581	0.00311634	0.001942	0.00339248	0.00149873	0.00197672	0.000627081	0.000738958	0.00321592	0.00158828	0.00193495	0.00158188	0.000691302	0.00184709	0	0.000651324
55	UniRef100_A4RHZ5	6	Putative uncharacterized protein	Magnaporthe grisea	0.000532664	0.00215235	0	0	0.00115409	0.000504021	0	0.00117473	0.000372662	0.000878296	0.00191115	0.000471942	0.000766602	0.00188016	0.000821653	0.00146359	0.00160826	0.00116121
56	UniRef100_Q2VJ43	1	Ubiquitin monomer protein (Fragment)	Morus mongolica	0.0132325	0.0133672	0.0124439	0.0143772	0.0107513	0.00626047	0.011063	0.0145913	0.0138865	0	0.00395642	0.00293101	0.0023805	0	0.00765435	0	0.00332938	0
57	UniRef100_Q06Z73	1	Fibrillin 8	Coffea canephora	0.00180228	0.00364126	0.00169487	0.00469964	0.00780976	0.00341072	0.00753395	0.00993676	0.00378272	0.00445759	0.00646641	0.00319364	0.00259381	0.00636154	0.00278007	0.00371405	0.00181386	0.00130965
58	UniRef100_B9HF65	2	Predicted protein	Populus trichocarpa	0.00181857	0.00275564	0	0.000790355	0.00295514	0	0.00152041	0.00401064	0.000636153	0.0014993	0.00326244	0	0.00196294	0.00240715	0	0.00187381	0.00457565	0.000660746
59	UniRef100_A1CNV5	6	40S ribosomal protein S5, putative	Aspergillus clavatus	0.00467754	0.00472517	0.00439879	0.0101643	0.00253363	0.00663901	0.00391065	0.00257894	0.00490873	0.00385633	0	0.00207215	0.00168296	0	0.00541145	0.00160654	0	0.0050985
60	UniRef100_C7YIZ8	1	Predicted protein	Nectria haematococca mpVI 77-13-4	0.00101995	0.00618201	0	0.00265963	0.00441972	0.00289531	0.00255818	0.00224938	0.00214073	0.000840884	0.00365949	0.000903677	0.00220184	0.00540021	0	0.000700621	0.00513252	0
61	UniRef100_C7Z9T2	2	Predicted protein	Nectria haematococca mpVI 77-13-4	0.00333003	0.00336394	0.0125263	0.00578896	0.00721498	0.00630193	0.00556814	0.00734399	0.0116488	0.0082362	0.0119479	0.0147521	0.00239627	0.00293852	0.00770504	0.00686237	0.0100543	0.00483964
62	UniRef100_P42056	1	Mitochondrial outer membrane protein porin of 36 kDa	Solanum tuberosum	0.00728746	0.00920209	0.00513989	0.00475072	0.00789465	0.00517169	0.00609268	0.00602686	0.00382383	0.00300403	0.0043578	0.00322835	0.002622	0.00321534	0.00281029	0.00375442	0.00550072	0.00397166
63	UniRef100_Q8M9Q5	1	Photosystem II CP47 chlorophyll apoprotein (Fragment)	Fagus grandifolia	0.00221513	0	0.00416625	0.000962701	0	0.00104801	0.00185196	0	0.00232462	0.00547871	0	0.00785045	0.00398498	0.00097735	0.00597961	0.00608645	0.00222937	0.00965796
64	UniRef100_A1KXJ7	19	Oil palm polygalacturonase allergen PEST472	Elaeis guineensis	0.00383112	0.00387014	0.00360282	0.00333003	0.00415033	0.00362511	0.00320301	0.00422454	0.00268032	0.00315852	0.00458192	0.00339438	0.00275685	0.0033807	0.00295482	0.00263167	0.00385574	0.00278394
65	UniRef100_C6RNU7	2	Conidiation-specific protein 10	Acinetobacter radioresistens SK82	0	0	0	0	0	0	0	0	0.00335041	0.0118444	0	0.00424298	0.0137842	0.0169035	0.0147741	0.00986875	0.0289181	0.00695986
66	UniRef100_A9PI96	1	Ferritin	Populus trichocarpa	0.00385314	0.00583857	0.00543528	0.00669833	0.00626128	0.00182297	0.00483212	0.00212441	0.00404359	0.00476501	0.0115206	0.00853473	0.00554538	0.0102004	0.00594361	0.00661698	0.00775581	0.00419992
67	UniRef100_Q48JY8	1	OprF	Pseudomonas syringae pv. phaseolicola 1448A	0	0	0.00137462	0	0	0.00276625	0.00244415	0.00161184	0.00102265	0.00241021	0	0.00259019	0.00315555	0.00128988	0.00225477	0.00301226	0	0.00212438
68	UniRef100_B7FK01	1	Putative uncharacterized protein	Medicago truncatula	0.00295785	0.00597595	0.00417238	0.00257098	0.0032043	0.0013994	0.00370936	0.0016308	0.00310405	0.00121928	0	0.00262066	0.00532112	0.00130505	0.00684389	0.0020318	0.00595372	0.00214937
69	UniRef100_B2W2I0	3	Citrate synthase	Pyrenophora tritici-repentis Pt-1C-BFP	0	0	0.00100611	0.00185986	0	0.00202466	0.000894457	0	0	0	0	0.0009479	0.00153973	0	0.0016503	0.00146981	0.00107674	0.00155486
70	UniRef100_Q676X3	1	2-cys peroxiredoxin-like protein (Fragment)	Hyacinthus orientalis	0.0102619	0.00777483	0.0072378	0.00668979	0.00833772	0.00728258	0.00643461	0.0113157	0.00717944	0.00846032	0.00920474	0.00454605	0.00553831	0.00905545	0.00593603	0.00704911	0.0103279	0.00559274
71	UniRef100_B9RZ33	1	Phosphoribulokinase	Ricinus communis	0.00748638	0.00504174	0	0.00542266	0.00135169	0	0.00625898	0	0.000872934	0.00822939	0.0029845	0.00221098	0.00538714	0.00440414	0.00192467	0.00514252	0.00376724	0.00181336
72	UniRef100_O78327	1	Transketolase 1	Capsicum annuum	0.00202756	0.00204821	0.000635577	0.00176236	0.0021965	0	0.00113009	0	0	0.00222879	0.0016166	0	0.00194536	0.000596394	0.000521264	0.00232128	0	0.000491119
73	UniRef100_A0A334	84	Photosystem I P700 chlorophyll a apoprotein A2	Coffea arabica	0	0	0.00127803	0.00059063	0	0.000642967	0	0	0.000475395	0.00056021	0.00162534	0.00120409	0.0014669	0	0.00104816	0.0014003	0.000683873	0.0019751
74	UniRef100_A1EGU2	8	Hydroxypyruvate reductase	Solenostemon scutellarioides	0.00130268	0.00394784	0	0.00339689	0.00423366	0	0.00217821	0.00287291	0	0.00214796	0.00155797	0	0.004687	0.00344858	0.00100472	0.00357934	0.00393316	0.000946613
75	UniRef100_Q02060	1	Photosystem II 22 kDa protein, chloroplastic	Spinacia oleracea	0.00550549	0.00741541	0.0051774	0.00638053	0.00795228	0.00173648	0.00460286	0.00404724	0.00385174	0.00151298	0.0021948	0.00162596	0.00396171	0.00161941	0.0014154	0.00378182	0.00369392	0.00133355
76	UniRef100_O24601	2	Glycine-rich RNA binding protein 1	Pelargonium x hortorum	0.00564983	0	0.00265657	0.00245543	0.00612057	0	0.00236177	0.00623001	0.00395273	0.00465793	0.0135141	0.0100115	0.00406558	0.00498559	0.0065363	0.00970242	0.00852921	0.00821107
77	UniRef100_P34794	2	RuBisCO large subunit-binding protein subunit alpha, chloroplastic	Brassica napus	0.00258749	0.00348511	0	0.00524779	0.00280308	0	0.00504762	0.0028532	0.000603418	0.00355537	0.00206304	0	0.00186194	0.00304437	0	0.00118493	0.00173608	0.000626746
78	UniRef100_Q2G3K4	1	OmpA/MotB	Novosphingobium aromaticivorans DSM 12444	0.0014085	0.00142284	0.00264913	0.00244855	0.00152586	0.00399828	0.00235515	0.00310628	0.00197083	0.00464488	0.00673811	0.00374381	0.00304064	0.00372872	0.00325899	0.00290257	0.00425266	0.00307053
79	UniRef100_A9L981	1	ATP synthase subunit alpha, chloroplastic	Lemna minor	0.00396714	0.00300565	0.00373073	0.00344825	0.00429768	0.00187691	0.00331672	0.0032809	0.00208161	0.00245299	0.00474459	0.000878724	0.00285472	0.00175036	0.000764932	0.0027251	0.00199632	0.00144139
80	UniRef100_A7F5P3	2	Putative uncharacterized protein	Sclerotinia sclerotiorum 1980 UF-70	0	0.00188831	0.00175788	0.00324956	0.00405005	0.00176876	0	0.00412246	0.00130778	0.0030822	0.0022356	0.00331236	0.00538046	0.00494852	0	0.00128404	0.00564386	0.00271667
81	UniRef100_A1KXM7	19	FtsH-like protein	Solanum lycopersicum	0.00280913	0.00283774	0.0019813	0.00244171	0.00228239	0.00132904	0.00176143	0.0015488	0.00049133	0.00173696	0.00167982	0.000622225	0.00151607	0.00123943	0.00162495	0.00192964	0.00212039	0.00102065
82	UniRef100_C6RRC0	2	Entericidin EcnA/B family protein	Acinetobacter radioresistens SK82	0.0402268	0.0507955	0.0283722	0.0174826	0.0653677	0.0475795	0.0504474	0.077626	0.049251	0	0.0120275	0	0.00723672	0.0177487	0.00775641	0.00690812	0	0.0146157
83	UniRef100_B6TMV9	2	Cysteine protease 1	Zea mays	0.00216273	0.00109238	0.00101692	0.00281978	0.00117146	0.00102322	0.00271222	0.00238482	0.000756543	0.000891517	0	0	0.00233443	0.00286269	0.000834022	0.00148562	0.00326494	0.00157158
84	UniRef100_A1TQL6	1	Putative uncharacterized protein	Acidovorax citrulli AAC00-1	0.00134089	0.00135455	0	0.00116551	0	0	0.00112105	0	0.000938113	0.00221096	0.00160367	0.00118803	0.000964897	0	0	0.000921083	0.00269902	0.00194876
85	UniRef100_O49124	4	Putative serine-glyoxylate aminotransferase	Fritillaria agrestis	0.00250791	0.00253344	0.00117923	0.00217988	0.00407529	0	0.00419346	0.00138272	0.000877288	0.00206761	0.00149969	0.00333301	0.00360934	0	0.000967133	0.00344545	0.00252402	0.000911204
86	UniRef100_A2TJV6	17	Chloroplast HSP70	Cucumis sativus	0.0021098	0.00213128	0	0	0.00228558	0	0.00235186	0.000775484	0	0.00173939	0.00168217	0.00124619	0.00202426	0.00124117	0.000542406	0.00144926	0.000707785	0.00102208
87	UniRef100_A6RIS9	5	Enolase	Botryotinia fuckeliana B05.10	0.00229605	0.00347915	0.00539805	0.0029936	0.00373103	0.00434516	0.00383922	0.00379775	0.00481908	0	0.00137301	0.00101715	0.00165222	0.00202611	0.00354174	0.000788599	0	0.00417115
88	UniRef100_O22077	2	Ribulose bisphosphate carboxylase small chain, chloroplastic	Fagus crenata	0	0	0	0.00240146	0	0	0	0	0	0	0	0.00244787	0.00397622	0.00243801	0.00213088	0.00759135	0	0.00200765
89	UniRef100_B9FLX9	9	Nucleoside diphosphate kinase	Oryza sativa Japonica Group	0.00420782	0	0.00197853	0	0	0	0.00175897	0	0.00147194	0.00173454	0	0	0	0	0.00162268	0.00144521	0	0.00152884
90	UniRef100_B8AWT0	3	Putative uncharacterized protein	Oryza sativa Indica Group	0.00460261	0.00348711	0.00108208	0.0020003	0.00373957	0.00108878	0.00577201	0.00380644	0.00161003	0.00094864	0	0	0.001656	0.00101537	0	0.00158081	0.00231609	0
91	UniRef100_D1HJL7	1	Whole genome shotgun sequence of line PN40024, scaffold_68.assembly12x (Fragment)	Vitis vinifera	0.00138522	0.00139933	0	0.00240808	0.00300127	0	0.00231622	0.00458241	0	0.00228405	0.00165668	0.00245462	0.00199359	0.00366708	0	0.00380613	0.00278824	0.00100659
92	UniRef100_B2W5M4	1	Elongation factor 2	Pyrenophora tritici-repentis Pt-1C-BFP	0	0	0.000569037	0.0010519	0	0.00114512	0	0	0.00254002	0.000498863	0	0.000536117	0	0.000533956	0.000933382	0	0	0.00175881
93	UniRef100_A1E9B0	46	Vacuolar H+-pyrophosphatase	Kalidium foliatum	0	0.000966614	0	0	0.000518298	0.000452707	0	0.00105513	0	0.000394439	0	0	0.000344278	0.000422186	0	0.000657291	0.000481509	0
94	UniRef100_C1G1F2	1	Elongation factor 1-alpha	Paracoccidioides brasiliensis	0.00109312	0.00110425	0.00102798	0	0.0011842	0	0	0	0.000764766	0	0	0.000968506	0.0015732	0.00385841	0	0	0.00220029	0.000794332
95	UniRef100_B9RE86	3	Protease, putative	Ricinus communis	0.00219899	0.00222138	0.000689314	0.00127425	0.00397034	0.000693579	0	0.00161653	0.000512817	0.00181293	0.00262993	0.000649436	0.00105492	0.00258727	0	0.00151052	0.00147541	0
96	UniRef100_C4JM20	1	Nucleoside diphosphate kinase	Uncinocarpus reesii 1704	0.00330813	0	0.00622197	0.00287544	0.00358376	0.00313023	0.00276575	0.00364784	0.00694327	0.00818202	0.00791285	0.00293101	0.0023805	0.00291919	0.0051029	0.00227241	0.00332938	0.0024039
97	UniRef100_A9PAF2	1	Nucleoside diphosphate kinase	Populus trichocarpa	0.00679507	0.00343213	0.00958519	0.00885945	0.00736123	0.0096445	0.011362	0.00749286	0.00713093	0.0056021	0.00406335	0.00602044	0.00733452	0.00599618	0.00524082	0.00700148	0.00683873	0.00493774
98	UniRef100_B9SZT9	1	Fructose-bisphosphate aldolase	Ricinus communis	0.00507914	0.00384815	0.00358235	0.00331111	0.00275117	0	0.00212321	0.00280036	0.000888365	0.00418743	0.00151863	0	0.00274118	0.002241	0	0.00261671	0.00127795	0.00184542
99	UniRef100_A7HKD8	1	Restriction modification system DNA specificity domain	Fervidobacterium nodosum Rt17-B1	0.00351633	0.00118405	0.00110226	0.0020376	0.00253954	0.00221816	0	0.00258495	0.000820029	0	0.00140181	0.00103849	0.00168688	0	0	0.000805143	0.00117964	0
100	UniRef100_A2YE72	27	Putative uncharacterized protein	Oryza sativa Indica Group	0.00286244	0.00385545	0.00358914	0.00331739	0.00413458	0.00270851	0.00159543	0.00420851	0.00267015	0	0	0	0.00205979	0.000841968	0.000735902	0.00131084	0.00288083	0
101	UniRef100_B9GGJ1	9	Predicted protein (Fragment)	Populus trichocarpa	0.000917582	0.000926926	0	0	0.000994035	0	0	0.00101181	0	0.00302595	0.0010974	0.00162596	0.00132057	0.000809703	0.000707701	0.000630303	0.00184696	0.00200032
102	UniRef100_P20115	2	Citrate synthase 4, mitochondrial	Arabidopsis thaliana	0.00424333	0.00321491	0.000997615	0.00184416	0.00229844	0.00200758	0.00354763	0.00350931	0.00148436	0.00174918	0.00126873	0.0028197	0.0022901	0.000936112	0.00245456	0.00218612	0.0021353	0.00231261
103	UniRef100_Q95FI2	1	ATP synthase subunit beta (Fragment)	Xyris sp. Chase 154	0.00416427	0.00420667	0	0.0036196	0.00225562	0.00295525	0.00174076	0.00229595	0.00364174	0.00171659	0.00249017	0	0.00149829	0.000918669	0.00160588	0.00214538	0.00314327	0.000756507
104	UniRef100_Q9GER1	1	ATP synthase subunit beta (Fragment)	Samolus repens	0.00581985	0.00352747	0	0.00404691	0.0025219	0.00440551	0.000973136	0.002567	0.00325734	0.00191924	0.00278415	0	0.00167517	0.00102712	0.00179546	0.00239865	0.00351435	0.000845816
105	UniRef100_A3KIS1	2	Putative peptidyl-prolyl cis-trans isomerase	Streptomyces ambofaciens ATCC 23877	0.00294056	0.0029705	0.00553064	0.00255594	0.00318556	0.00278243	0.00245845	0.00324252	0.00822907	0.0048486	0.00351682	0.0104214	0.002116	0.00518967	0.00680387	0.00403984	0.00295945	0.0085472
106	UniRef100_C7ZD82	1	Predicted protein	Nectria haematococca mpVI 77-13-4	0	0	0.0014011	0	0	0.000704882	0	0	0.000521174	0	0	0	0.00107211	0	0.0011491	0.00102343	0.000749728	0.000541322
107	UniRef100_B9XPE7	1	ATP synthase F1, beta subunit	bacterium Ellin514	0.0031232	0.003155	0.000979026	0.0027147	0.00225562	0.00295525	0.000870382	0.00344392	0.00218505	0.00171659	0.00249017	0	0.00149829	0.000918669	0.00160588	0.00214538	0.00314327	0.000756507
108	UniRef100_Q1NB62	1	OmpA/MotB	Sphingomonas sp. SKA58	0.00140457	0.00283774	0.00132086	0.00122086	0.00304319	0.00132904	0.00117429	0.0015488	0.00196532	0.00347393	0.00503947	0.00124445	0.00303215	0.00247887	0.00216659	0.00192964	0.00141359	0.0020413
109	UniRef100_B9HGN8	3	Predicted protein (Fragment)	Populus trichocarpa	0.0026605	0.00403139	0.00250196	0.00115626	0.00288218	0.00251744	0.00333647	0.00440057	0.000930668	0.00109671	0.00159094	0.00471442	0.00287172	0.00234771	0.00307794	0.00274132	0.0040164	0.00386659
110	UniRef100_B6HK84	1	Nucleoside diphosphate kinase	Penicillium chrysogenum Wisconsin 54-1255	0.00657301	0.00663994	0.0123626	0.00856992	0.00356033	0.0124391	0.00549535	0.003624	0.00919719	0.00541903	0.00393056	0.0116474	0.00472988	0.00290011	0.0101391	0.00225756	0.00330762	0.00955275
111	UniRef100_A5A8K5	3	Subtilisin-like serine protease	Acremonium sp. F11177	0.0037525	0.000947678	0.00352888	0.00163084	0.00101629	0.00266303	0.000784318	0	0.00196899	0.00232027	0	0.00249354	0.0020252	0.00082783	0.00289418	0.00257766	0	0.00204511
112	UniRef100_A7EJZ9	2	Heat shock protein SSB	Sclerotinia sclerotiorum 1980 UF-70	0.0016379	0.000827289	0.000770146	0.00284734	0.000887184	0.000774911	0.00205405	0.000903048	0.00286476	0	0	0	0	0.000722666	0	0	0	0.000595102
113	UniRef100_C5PH56	2	6-phosphogluconate dehydrogenase, decarboxylating	Coccidioides posadasii C735 delta SOWgp	0.00204821	0	0.0038523	0.00356062	0	0.00387613	0.0017124	0.00112927	0.00286593	0.00168862	0	0.00272207	0.00221081	0.0018074	0.00315943	0.000703475	0.00309206	0.00297672
114	UniRef100_C0J9K3	3	ATP synthase subunit beta (Fragment)	Chasmanthera welwitschii	0.00310392	0.0041807	0	0.00269794	0.00224169	0.00293701	0.00086501	0.00228177	0.00217156	0.00170599	0.0024748	0	0.00148904	0.000912998	0.00159597	0.00213214	0.00312387	0.000751837
115	UniRef100_A8D978	25	Histone H4 (Fragment)	Iberis amara	0	0.00277571	0.00258399	0.00238834	0.00595335	0.00259998	0	0.0060598	0.00576709	0.00226533	0.00328621	0.00486899	0.00197725	0.00727405	0.00211924	0.00377493	0.00276539	0.00399336
116	UniRef100_A7Y2G2	1	Germin-like protein	Chimonanthus praecox	0	0	0.00441934	0.00408473	0	0.00222334	0	0	0.00164389	0.00387435	0.00281017	0	0.00169082	0	0.00362449	0.00161405	0	0
117	UniRef100_B9HJE0	17	Predicted protein	Populus trichocarpa	0.0024934	0.000839596	0.000781603	0.00216727	0.00270115	0.000786439	0.00277947	0.00274944	0.00116295	0.00205565	0.00198802	0.000736385	0.00119615	0.00146683	0.000641025	0.00171276	0.00250942	0.000603955
118	UniRef100_B3N1J9	17	ATP synthase subunit beta	Drosophila ananassae	0.00287334	0.0029026	0	0.00249752	0.00207517	0.00271883	0.0016015	0.00211227	0.00201024	0.00157926	0.00229096	0	0.00137842	0.000845175	0.00147741	0.00197375	0.00289181	0.000695986
119	UniRef100_C3Z8M3	1	ATP synthase subunit beta	Branchiostoma floridae	0.00288433	0.0029137	0	0.00250707	0.0020831	0.00272923	0.00160763	0.00212035	0.00201793	0.0015853	0.00229972	0	0.00138369	0.000848407	0.00148306	0.0019813	0.00290287	0.000698648
120	UniRef100_B2WC39	1	ATP synthase subunit alpha	Pyrenophora tritici-repentis Pt-1C-BFP	0	0	0.00137064	0.00126686	0.000789465	0.00275823	0.000609268	0	0.00152953	0.00120161	0	0.00129134	0.0010488	0	0.00168618	0.000500589	0	0.00264777
121	UniRef100_Q94IA8	1	Transketolase	Persicaria tinctoria	0	0	0	0	0	0.000767412	0	0	0.00113481	0.000668638	0.000969962	0.000718569	0.000583607	0	0	0.00167132	0.000816236	0.000589343
122	UniRef100_A6S046	8	40S ribosomal protein S14	Botryotinia fuckeliana B05.10	0.00333003	0.00336394	0.0125263	0.00289448	0	0.00630193	0	0	0.0046595	0	0	0	0	0	0	0	0	0.00241982
123	UniRef100_B2VS41	2	Acyl-CoA dehydrogenase family member 11	Pyrenophora tritici-repentis Pt-1C-BFP	0	0	0.000991341	0	0	0	0	0	0.00147502	0	0	0.000933989	0	0	0.00162608	0	0	0.000766022
124	UniRef100_A8PRI2	1	Putative uncharacterized protein	Malassezia globosa CBS 7966	0	0.00157995	0	0.00067973	0	0	0	0.000862319	0.00164133	0.00128944	0.00187053	0	0.000562731	0.00207022	0.00120628	0.000537179	0.00314816	0.00170479
125	UniRef100_O81439	1	Probable plastid-lipid-associated protein 1, chloroplastic	Arabidopsis thaliana	0	0.00319469	0.00148701	0.00274884	0.00171299	0	0.001322	0.00174362	0.00221253	0	0	0	0	0	0	0	0	0
126	UniRef100_C5CY09	1	Porin	Variovorax paradoxus S110	0	0.00263873	0.00122823	0	0	0.0037075	0.00218387	0.00144019	0	0.00107677	0.00312403	0.00347153	0.0028195	0.00230502	0.00302198	0.00179432	0.00131446	0.00379629
127	UniRef100_A6XBI6	3	Plastid fibrillin 2 (Fragment)	Coffea canephora	0.00269617	0.00272362	0.00126775	0.00117176	0.00292081	0.00127559	0.00225413	0.00297304	0.00188629	0	0.00161227	0	0	0.00237918	0.00103973	0.000926022	0	0
128	UniRef100_P40108	1	Aldehyde dehydrogenase	Davidiella tassiana	0	0	0.000953366	0.00264355	0	0	0.00084757	0	0.00141852	0	0	0	0.00218853	0	0.00156379	0.00208915	0.0010203	0.000736679
129	UniRef100_Q89K42	1	Bll5076 protein	Bradyrhizobium japonicum	0	0	0	0	0	0	0	0	0	0.000712295	0.00103329	0	0.000621712	0.0015248	0.000666358	0.00178044	0.00173906	0.000627822
130	UniRef100_A2RAS8	2	Contig An18c0150, complete genome	Aspergillus niger CBS 513.88	0	0	0.00444705	0.00137011	0	0.00149152	0.00131785	0	0.0022056	0.00259909	0	0.00279318	0.00113428	0	0.00243148	0.00108278	0	0.00458173
131	UniRef100_B9GJB2	2	Predicted protein (Fragment)	Populus trichocarpa	0.00540683	0.00546189	0.00169487	0.00156655	0.00390488	0.00170536	0.00301358	0.0039747	0.00378272	0.00148586	0	0.00159682	0.0012969	0	0.00139004	0	0.00181386	0
132	UniRef100_C6TFH5	1	Superoxide dismutase [Cu-Zn]	Glycine max	0.00779589	0.00787528	0.00366566	0.0101643	0.00422272	0.00368834	0.00977662	0.00429823	0.00545415	0.00642722	0.00466183	0.00345359	0.00280493	0.00343967	0	0.00535513	0.003923	0.005665
133	UniRef100_A9NU00	10	Putative uncharacterized protein	Picea sitchensis	0.00243504	0.00122992	0	0.00211654	0.00263792	0	0.00305371	0.00134255	0.000851798	0.00501883	0.00291223	0.00215745	0.00175223	0.00107438	0.000939032	0.00334534	0.00122534	0.000884728
134	UniRef100_A2WWL6	9	Malate dehydrogenase	Oryza sativa Indica Group	0.00121752	0.00368975	0.00343489	0.00211654	0.00263792	0.00345614	0.00305371	0.00402764	0.00255539	0.00200753	0.00145612	0.00107872	0.00262835	0.00214875	0.000939032	0.002509	0.00122534	0
135	UniRef100_D1H5V7	1	Whole genome shotgun sequence of line PN40024, scaffold_4.assembly12x (Fragment)	Vitis vinifera	0.00165406	0.00250636	0	0.00143772	0.00268782	0	0.000691439	0.00273588	0.00115721	0.00136367	0.00296732	0.0014655	0.00178538	0.0014596	0	0.00170431	0.00249704	0.000600975
136	UniRef100_D0ELH5	1	Cyclophilin	Citrus sinensis	0.00584692	0	0.00549848	0.00508216	0	0.00829876	0.00733246	0	0.00204531	0.00241021	0	0	0.0021037	0.00257975	0.00450954	0.00401635	0	0.00212438
137	UniRef100_A1CUJ5	11	Carboxypeptidase CpyA/Prc1, putative	Aspergillus clavatus	0.000902756	0	0.00169792	0	0	0	0.000754748	0.00099546	0.00126317	0	0	0	0.000649616	0	0.00139253	0	0	0
138	UniRef100_B7FKU0	3	Putative uncharacterized protein	Medicago truncatula	0	0	0	0	0	0	0	0	0.00123004	0.00144949	0.00210271	0.00311547	0.00126516	0.00310292	0.00271203	0.00120771	0.00176946	0
139	UniRef100_UPI00016E1D7E		UPI00016E1D7E related cluster	Takifugu rubripes	0	0.0012329	0.00114774	0	0.00132216	0	0.00102038	0	0	0	0.00145965	0	0	0	0	0.000838365	0	0
140	UniRef100_B9SFR3	1	Putative uncharacterized protein	Ricinus communis	0.00261893	0	0.00738859	0.00227639	0	0.00991241	0.00218956	0	0.00732901	0.00431829	0.00313217	0.00928152	0.00565369	0	0.00807959	0.00359798	0.00263576	0.00570926
141	UniRef100_B9H6N6	3	Porin/voltage-dependent anion-selective channel protein	Populus trichocarpa	0.00364373	0.00736167	0.00342659	0	0.00197366	0	0.00304634	0	0	0	0.0043578	0	0.003933	0.00321534	0	0.00375442	0.00183357	0
142	UniRef100_B9N9W6	4	Predicted protein	Populus trichocarpa	0	0	0.000721938	0	0	0	0	0	0.000537088	0	0	0.000680172	0	0.000677431	0	0	0	0
143	UniRef100_A5BDU2	12	Putative uncharacterized protein	Vitis vinifera	0.00122943	0	0.00173424	0.00106862	0.00133186	0	0.00102786	0.000677838	0.000860128	0.00152037	0.00220554	0.000544637	0.000442343	0.00108488	0.000474108	0.00168903	0.00185599	0
144	UniRef100_B3NSA0	3	GG20235	Drosophila erecta	0.00168737	0.00170455	0.00158681	0.000733332	0.000913978	0.00159663	0.00211608	0.00186064	0	0	0	0	0	0.000744492	0.000650705	0.000579541	0	0.00183922
145	UniRef100_B9ICS6	2	Predicted protein	Populus trichocarpa	0.00157382	0.00158985	0	0.00136797	0.00170495	0.000744594	0.00131579	0.000867717	0.00110107	0.00129751	0	0.00139441	0.00113251	0.000694393	0.000606918	0.000540542	0.000791966	0.00114364
146	UniRef100_A6RSQ7	2	Putative uncharacterized protein	Botryotinia fuckeliana B05.10	0	0	0.00226796	0.00314436	0	0	0	0	0	0.000994138	0	0	0	0	0.000930025	0.000828312	0	0.000876241
147	UniRef100_A4WG29	10	Thioredoxin	Enterobacter sp. 638	0.0104757	0	0.00328382	0.00607036	0.0113486	0.00991241	0.00875822	0.00770099	0.00488601	0.00287886	0.00417622	0	0.00251275	0.00308137	0.0026932	0.00239865	0	0.0101498
148	UniRef100_A4SBB9	31	Serine hydroxymethyltransferase	Ostreococcus lucimarinus CCE9901	0	0.0018239	0.000848958	0.000784679	0	0	0.000754748	0	0.00189475	0.00223279	0.00107967	0.000799844	0.00129923	0	0	0.00124024	0	0.000656001
149	UniRef100_B2W091	1	Aspartate aminotransferase	Pyrenophora tritici-repentis Pt-1C-BFP	0.00110513	0.00111639	0	0.000960585	0.00239442	0	0	0.00121862	0	0	0	0	0.000795244	0	0	0	0.00111223	0
150	UniRef100_Q0UU52	1	Putative uncharacterized protein	Phaeosphaeria nodorum	0.000790621	0.000798672	0.000743506	0	0	0.000748106	0.000660998	0	0.000553133	0	0	0.000700492	0.000568925	0	0	0	0	0.000574517
151	UniRef100_B4FBF2	3	Putative uncharacterized protein	Zea mays	0.00191556	0.0029026	0	0.00166501	0.00311275	0.00181255	0.00240226	0.00211227	0	0.00157926	0.00229096	0	0.00137842	0.00253553	0.000738705	0.00197375	0.00192787	0.000695986
152	UniRef100_A0A075	49	H+-ATPase proteolipid	Acanthus ebracteatus	0.00242915	0.00245389	0.00228439	0	0.00263155	0	0	0.00267861	0	0.00200268	0.0029052	0.00215224	0.001748	0.00428712	0	0.00333726	0.00488953	0
153	UniRef100_A9Z0V7	6	Carotenoid cleavage dioxygenase 1	Rosa x damascena	0.00181857	0.000918545	0.000855099	0	0.000985047	0	0.00152041	0.00100266	0	0.00224895	0	0	0.00130863	0	0	0.00124921	0	0
154	UniRef100_A5AHP2	10	Putative uncharacterized protein	Vitis vinifera	0.00138522	0	0	0	0	0	0	0	0.00193825	0	0	0.00122731	0.000996794	0.00122236	0	0.00190306	0.00139412	0.00100659
155	UniRef100_A4QT34	22	Cell division control protein Cdc48	Magnaporthe grisea	0.000610237	0	0	0	0	0.000577422	0.000510188	0	0	0	0	0	0	0	0	0	0	0.000886875
156	UniRef100_A5DAI9	2	Transaldolase	Pichia guilliermondii	0	0	0	0	0.00169171	0	0.00130557	0.00172196	0.00109252	0	0	0	0	0	0	0	0.00314327	0
157	UniRef100_B2VT43	1	Woronin body major protein	Pyrenophora tritici-repentis Pt-1C-BFP	0	0	0.00147772	0.000682916	0	0.00223029	0.000656867	0	0.00109935	0	0	0	0	0	0.00121194	0.000539697	0	0.000570926
158	UniRef100_Q7LHE2	2	Cyclophilin, cytosolic form	Tolypocladium inflatum	0.00221513	0.00223769	0	0	0.0023997	0	0.00185196	0.0024426	0	0.00182624	0.00529847	0.00196261	0.00318798	0.0058641	0.00170846	0.00152161	0.00445873	0.00160966
159	UniRef100_A1D5E3	4	Pectate lyase, putative	Neosartorya fischeri NRRL 181	0.00187625	0	0.00176444	0	0	0	0	0	0	0.0061874	0.00224394	0.00664945	0.00405041	0.00165566	0.00434127	0.00515532	0.00188831	0.00409022
160	UniRef100_A5X2M7	3	60S ribosomal protein L12 (Fragment)	Stachybotrys elegans	0.00609497	0.00307852	0.00573175	0.00264889	0.0033014	0.0115344	0.00509569	0.00672086	0.00639623	0.00251246	0.00364471	0.00270008	0.00657884	0.00537839	0.00470085	0	0.00306707	0.0022145
161	UniRef100_A9P967	1	Predicted protein	Populus trichocarpa	0.00336345	0.00509654	0	0.00438528	0.00364369	0	0.00421801	0	0	0.00138647	0.00201129	0	0.00242031	0.00296801	0	0.00231041	0.00169253	0.00122205
162	UniRef100_C6TI22	2	Putative uncharacterized protein	Glycine max	0	0	0	0	0	0	0	0	0.00100512	0.00236889	0	0.00509158	0.00103382	0	0.00221612	0.00197375	0.0014459	0.00417592
163	UniRef100_A9NPA6	2	Nucleoside diphosphate kinase	Picea sitchensis	0	0.00343213	0.00319506	0.00295315	0	0	0.0028405	0.00749286	0.00475395	0.00280105	0	0	0	0	0	0	0	0
164	UniRef100_B6ZHC0	1	PR-5 protein	Glycine max	0	0	0	0.00364222	0	0.00198248	0	0	0	0.00690926	0.00250573	0.00556891	0.0030153	0.00369764	0.00323184	0.00143919	0.00210861	0.00608988
165	UniRef100_B8LQJ2	1	Putative uncharacterized protein	Picea sitchensis	0	0	0	0	0	0.00195801	0	0.00228177	0.00144771	0.00511797	0.0049496	0.00733354	0.00297808	0.00365199	0.00478791	0.00284285	0.00416516	0.00601469
166	UniRef100_B8LX15	2	Bifunctional catalase-peroxidase Cat2	Talaromyces stipitatus ATCC 10500	0	0	0.000615716	0	0	0	0	0	0.000458063	0.00107957	0.00156608	0.00116019	0.00188456	0.00173327	0.00151492	0.000449748	0.00131788	0.000951543
167	UniRef100_UPI000023F1DE	1	hypothetical protein FG02461.1	Gibberella zeae PH-1	0	0	0.00422205	0	0.00162122	0.00141606	0.00125117	0	0.003141	0	0.00178981	0.00397779	0.00107689	0.00132059	0.00115423	0	0	0.00108748
168	UniRef100_B8II78	1	Acid phosphatase (Class B)	Methylobacterium nodulans ORS 2060	0.0020608	0	0	0.00179125	0	0	0.00172293	0	0.00288355	0.001699	0	0.00182587	0.00296587	0.00363703	0.00158943	0.0028312	0	0.00299502
169	UniRef100_Q6EW22	1	Cytochrome b6	Nymphaea alba	0.0070163	0.00472517	0.00659818	0.00406573	0.0076009	0.004426	0.00391065	0.00515787	0	0.00385633	0	0.00207215	0.00168296	0.0041276	0.00360763	0	0.00470759	0.0016995
170	UniRef100_B9GKG1	1	Predicted protein (Fragment)	Populus trichocarpa	0	0	0	0	0	0	0	0	0	0.00717845	0.00520672	0.00578588	0.00313278	0.00384171	0.00335775	0.00598106	0	0.00632715
171	UniRef100_Q84LB8	1	Glycolate oxidase	Zantedeschia aethiopica	0.00274025	0.0055363	0.00128847	0	0.00296856	0.00129645	0.00114549	0.00151082	0.000958563	0.00112958	0.00327726	0.00242786	0	0.00120904	0	0.000941161	0	0.00099562
172	UniRef100_C9SFN5	1	Formate dehydrogenase	Verticillium albo-atrum VaMs.102	0.00137387	0	0.00129199	0.00119417	0.00148834	0.00129999	0.00229724	0.00151495	0.00288355	0	0.00328621	0.00121725	0.00197725	0.00242468	0	0.000943733	0.0013827	0.000998341
173	UniRef100_C9SK65	2	Glyceraldehyde-3-phosphate dehydrogenase	Verticillium albo-atrum VaMs.102	0	0.00300565	0	0.0012931	0	0	0.00248754	0.00164045	0.00104081	0	0.00177922	0	0	0.00262555	0.0011474	0	0.00149724	0
174	UniRef100_C6RQL5	2	Putative uncharacterized protein	Acinetobacter radioresistens SK82	0	0.00236258	0	0	0	0.002213	0	0	0	0.0057845	0.0083913	0.00828861	0.00336592	0.0061914	0.00360763	0.00321308	0.00470759	0.0050985
175	UniRef100_A5AER7	7	Putative uncharacterized protein	Vitis vinifera	0.00215193	0.000724616	0	0.00187047	0.00155415	0.000678738	0.000599707	0.000790972	0	0.00177413	0	0	0.00154851	0.000632977	0	0.000985467	0.00144384	0
176	UniRef100_Q2Z1Y2	1	Serine carboxypeptidase	Prunus mume	0	0.00100386	0	0	0	0	0	0.00219159	0	0	0	0	0.000715091	0.00263073	0.00153289	0.00136524	0	0.00072212
177	UniRef100_B6HGB8	1	Pc20g11840 protein	Penicillium chrysogenum Wisconsin 54-1255	0	0	0.0054667	0	0	0	0	0	0	0	0	0	0	0	0	0	0	0
178	UniRef100_A9PHJ3	5	Putative uncharacterized protein	Populus trichocarpa	0	0	0	0	0	0	0	0	0	0	0.000673434	0.000997789	0	0	0	0.000386793	0	0
179	UniRef100_A2YXH5	18	Putative uncharacterized protein	Oryza sativa Indica Group	0	0	0	0	0	0	0.00111807	0	0	0.00110254	0.00159941	0	0.00481165	0	0	0.00183727	0.00134592	0
180	UniRef100_C8VMQ7	1	ATP synthase alpha chain, mitochondrial (Broad)	Aspergillus nidulans FGSC A4	0.00180876	0	0	0.00235827	0.00195946	0	0	0.000997251	0	0.000745604	0.00216322	0	0.000650785	0	0.000697519	0	0.000910191	0.000657181
181	UniRef100_C7YME4	1	Superoxide dismutase [Cu-Zn]	Nectria haematococca mpVI 77-13-4	0.00653033	0.00659682	0.00614116	0.00283809	0	0.00308958	0	0	0.00456873	0.00538384	0.00781008	0	0.00234959	0.00288128	0.00251831	0.00672869	0.00328615	0.00474536
182	UniRef100_B6CQT4	4	Putative allergen Pru du 2.01A	Prunus dulcis x Prunus persica	0	0	0	0	0	0	0	0	0	0.00337037	0	0.00362206	0.00147088	0.00180373	0.00630602	0.00280818	0	0.00148534
183	UniRef100_A7EUG8	1	Malate dehydrogenase	Sclerotinia sclerotiorum 1980 UF-70	0.00151456	0.00152999	0	0	0	0.00143312	0	0.00334019	0.00105962	0.00249732	0.00181137	0	0.00217974	0	0.00116813	0.00208076	0	0.00110058
184	UniRef100_Q19NJ4	1	60 kDa chaperonin 2	Enterobacteriaceae	0.000922633	0.000932028	0	0	0.00199901	0.00174604	0	0	0.000645491	0	0	0	0	0.00244248	0.00142319	0	0.000928562	0.00134089
185	UniRef100_D1HFG4	1	Whole genome shotgun sequence of line PN40024, scaffold_1.assembly12x (Fragment)	Vitis vinifera	0.00146173	0	0	0	0	0	0.00122208	0	0	0.00361531	0	0.0012951	0	0.00128988	0	0.00100409	0	0.00106219
186	UniRef100_Q8W3M4	1	Uncharacterized protein At4g06744	Arabidopsis thaliana	0	0	0.00234094	0.00108185	0	0.00235542	0.00208116	0	0.000870774	0.00205226	0	0.00330826	0.00179127	0.00109831	0.00287985	0.0025649	0	0.00271331
187	UniRef100_Q8L5C8	1	Malate dehydrogenase	Solanum tuberosum	0.00292346	0.00442984	0	0.00127054	0.00316704	0.00138313	0.00366623	0.00322367	0.00102265	0	0	0	0	0	0	0	0	0
188	UniRef100_A4V8W3	1	Metallo-endopeptidase	Hypocrea lixii	0.00144909	0	0.00272547	0.00125956	0	0	0.00121151	0	0	0.00119468	0	0	0	0	0	0.000995407	0	0.00210601
189	UniRef100_C3MJS6	3	Putative uncharacterized protein	Sulfolobus islandicus	0	0	0	0	0	0	0.00282144	0	0	0.00278225	0	0.00299002	0.00242843	0.00297797	0.00520564	0	0	0.0024523
190	UniRef100_C5P088	2	ATP synthase subunit alpha	Coccidioides posadasii C735 delta SOWgp	0	0	0.000852017	0	0	0	0	0	0.00063386	0	0.00216712	0.000802726	0.000651957	0.00079949	0.000698775	0	0	0.000658365
191	UniRef100_P30361	2	Cytochrome b6-f complex iron-sulfur subunit 1, chloroplastic	Nicotiana tabacum	0	0	0	0.00191696	0.00238917	0	0	0	0	0.0072729	0.00263762	0.00390801	0.006348	0.00389226	0.00170097	0.00454482	0.00665877	0.0016026
192	UniRef100_A6SCR5	7	Putative uncharacterized protein	Botryotinia fuckeliana B05.10	0	0	0.000842905	0	0	0	0	0	0	0	0	0.000794141	0	0	0	0	0	0.000651324
193	UniRef100_Q6UNN8	1	Cobalamin-independent methionine synthase (Fragment)	Epichloe festucae	0.00145961	0.00147447	0.000686313	0.000634349	0	0.000690559	0.000610152	0	0.000510584	0.000601677	0.000872825	0.000646608	0	0	0.000562874	0	0.000734494	0
194	UniRef100_C8Q7W5	1	OmpA domain protein transmembrane region-containing protein	Pantoea sp. At-9b	0	0.00285368	0	0	0	0	0.00236177	0	0.00296454	0.00116448	0	0	0.00101639	0.0012464	0	0.00291073	0.00142153	0.00102638
195	UniRef100_B9IMD7	10	Predicted protein	Populus trichocarpa	0	0	0	0	0.00182184	0.000795645	0.000703001	0.00185442	0	0.000693237	0.00100565	0	0.000605077	0.001484	0	0.000577602	0.00169253	0
196	UniRef100_A3C9R5	4	Putative uncharacterized protein	Oryza sativa Japonica Group	0.00137012	0.000692037	0.000644237	0.00119092	0.00148428	0	0.00114549	0.00151082	0.000479281	0.00056479	0.00163863	0.000606966	0.00098593	0.000604519	0	0.000470581	0.000689464	0.00049781
197	UniRef100_C9NC88	2	Thermolysin	Streptomyces flavogriseus ATCC 33331	0	0	0.00138875	0.000641801	0.000799899	0	0.00061732	0.000814202	0.000516582	0.00121749	0.00176616	0	0.00159399	0.00130313	0.00113897	0.00152161	0.00148624	0.00160966
198	UniRef100_Q53I52	1	Glyceraldehyde-3-phosphate-dehydrogenase	Lupinus albus	0	0	0	0	0	0	0	0	0	0	0	0	0	0	0	0	0	0.00123862
199	UniRef100_B5KUF5	4	Glyceraldehyde-3-phosphate dehydrogenase (Fragment)	Helianthus annuus	0	0	0	0	0	0	0.00187676	0.00247532	0	0	0	0	0	0.00198088	0	0	0	0
200	UniRef100_A9PIE8	2	Putative uncharacterized protein	Populus trichocarpa	0	0	0	0	0	0	0	0	0	0	0	0	0	0	0	0.00111063	0.00162722	0
201	UniRef100_A0ARF5	17	Cytochrome b559 subunit alpha (Fragment)	Magnoliophyta	0.00605825	0	0.00569722	0.00526586	0	0.00573248	0.01013	0	0.00847693	0.00499465	0	0.0161029	0	0	0.00934507	0.00416152	0	0.00880464
202	UniRef100_P46487	1	Malate dehydrogenase, mitochondrial	Eucalyptus gunnii	0	0.00146385	0	0	0	0	0	0	0	0.00119468	0.00173307	0	0.00208551	0	0	0	0	0.001053
203	UniRef100_A4RI79	7	Putative uncharacterized protein	Magnaporthe grisea	0	0	0.0020165	0.000931911	0	0	0.000896364	0	0.000750091	0.000883914	0.00128225	0	0.000771506	0.000946092	0	0.000736474	0	0.000779089
204	UniRef100_Q0CCF8	1	Putative uncharacterized protein	Aspergillus terreus NIH2624	0	0	0.00202081	0	0	0.00203331	0	0	0	0.00354321	0.00256998	0.0076156	0.00463893	0	0.0033147	0.00590438	0.00216268	0.00624603
205	UniRef100_A1DP75	9	Carboxypeptidase CpyA/Prc1, putative	Neosartorya fischeri NRRL 181	0	0	0.000852017	0.000787507	0	0	0	0	0.00063386	0	0	0	0	0	0	0	0	0
206	UniRef100_UPI0001985987		PREDICTED: hypothetical protein	Vitis vinifera	0	0	0	0.000827777	0	0	0	0	0	0.00235543	0	0	0.00205589	0	0	0.00196254	0	0
207	UniRef100_C5CPL8	1	Porin	Variovorax paradoxus S110	0	0	0.0011422	0	0.00263155	0	0	0.00401791	0	0	0.0014526	0.00215224	0.001748	0.00107178	0.00187353	0.00166863	0.00122238	0.000882591
208	UniRef100_B4FLP0	3	Putative uncharacterized protein	Zea mays	0.00245285	0	0	0	0.00132861	0	0	0.00135237	0	0	0	0	0	0	0	0	0	0
209	UniRef100_B9IA60	5	Predicted protein	Populus trichocarpa	0	0	0	0	0	0	0	0	0	0.000808889	0	0.000869293	0.000353011	0.000432895	0	0.000673963	0.000987447	0.00106944
210	UniRef100_A1CT41	29	Cell wall integrity signaling protein Lsp1, putative	Aspergillus clavatus	0	0	0	0.000635271	0	0	0	0	0	0	0.000874094	0.000647548	0	0	0	0	0	0
211	UniRef100_B2TV71	2	Glutaredoxin	Shigella boydii CDC 3083-94	0	0	0	0.00514195	0	0	0	0	0	0	0	0	0	0	0	0	0	0
212	UniRef100_Q0UAM1	1	Nucleoside diphosphate kinase	Phaeosphaeria nodorum	0	0.00331997	0.0061813	0	0.00356033	0.00932932	0.00274768	0.003624	0.0045986	0.00270951	0.00393056	0.0058237	0.00236494	0.00290011	0.00506955	0.00225756	0.00330762	0.00477637
213	UniRef100_B6Q6K2	2	Mitochondrial ADP,ATP carrier protein (Ant), putative	Penicillium marneffei ATCC 18224	0	0	0.00450352	0	0	0.00453139	0	0	0.00335041	0	0	0.00565731	0	0	0.0049247	0.00109653	0	0.00463991
214	UniRef100_Q5KFU0	1	ATP synthase subunit beta	Filobasidiella neoformans	0.00183852	0.00185724	0.000864478	0.00239707	0.0019917	0.00260948	0.00153709	0.00202732	0.00192939	0	0	0.000814466	0	0	0	0	0	0
215	UniRef100_A5E3E0	1	Nucleoside diphosphate kinase	Lodderomyces elongisporus	0.00666007	0.00672789	0.00626317	0.00289448	0.00360749	0.00630193	0.00278407	0.003672	0.0046595	0.0054908	0.00398262	0	0.00239627	0	0.00256835	0.00457492	0.00335143	0.00241982
216	UniRef100_A8JIJ1	27	Subunit of exon junction complex	Chlamydomonas reinhardtii	0.000965134	0.000974963	0	0	0	0.000913235	0	0	0	0	0	0.000855111	0.000694503	0	0.00148875	0	0	0.000701329
217	UniRef100_A6YNL9	36	Chitinase	Trichoderma viride	0.00118593	0.00119801	0.00111526	0.00206163	0	0.00112216	0.000991497	0	0.000829699	0.000977725	0	0	0	0	0	0.00162927	0.00119355	0.000861775
218	UniRef100_A2QPY3	1	Contig An08c0020, complete genome	Aspergillus niger CBS 513.88	0.00261893	0	0.00246286	0.00455277	0	0	0.00218956	0	0.00183225	0	0	0.00232038	0	0	0.0020199	0.00179899	0	0.00190309
219	UniRef100_A5ADV7	6	ATP-dependent Clp protease proteolytic subunit	Vitis vinifera	0	0	0	0	0	0	0	0	0	0.00142459	0	0	0	0	0	0	0	0
220	UniRef100_A8BA83	1	Superoxide dismutase [Cu-Zn]	Hypocrea lixii	0.00653033	0.00329841	0.00614116	0	0	0.00308958	0	0.00360046	0.00228437	0.00269192	0.00390504	0.00289294	0.00234959	0.00288128	0.00503663	0.0022429	0.00328615	0.00237268
221	UniRef100_A4V8W2	3	Serin endopeptidase	Hypocrea lixii	0	0	0	0	0	0	0	0	0.000653889	0.000770549	0	0.00165618	0	0	0.000720856	0.000642019	0	0
222	UniRef100_B6HC69	1	Pc18g05490 protein	Penicillium chrysogenum Wisconsin 54-1255	0	0	0.00207855	0	0	0.0010457	0	0	0.00154634	0.000911111	0	0.00293745	0.00159049	0.00292561	0.00255706	0.000759135	0.00111223	0.00160612
223	UniRef100_B5M1Y6	1	Alcohol dehydrogenase	Rheum australe	0	0.00101591	0	0	0	0	0.000840789	0	0.000703585	0.000829111	0	0.000891026	0.000723672	0.000887434	0	0.000690812	0.00101213	0
224	UniRef100_A9PI52	2	Putative uncharacterized protein	Populus trichocarpa	0.00117211	0	0	0	0	0	0.000979941	0	0	0.00096633	0	0	0.000843441	0.00206861	0	0.000805143	0.00117964	0
225	UniRef100_A9PCR0	2	Malate dehydrogenase	Populus trichocarpa	0.00437248	0.00147233	0.00274127	0.00253372	0	0.00413735	0.00121854	0	0.00305907	0	0	0	0.0010488	0	0	0	0	0.00105911
226	UniRef100_UPI000194C4F6		PREDICTED: similar to carbamoylphosphate synthetase 2/aspartate transcarbamylase/dihydroorotase, partial	Taeniopygia guttata	0	0	0	0.000230156	0	0	0	0	0	0	0	0	0	0	0	0	0	0
227	UniRef100_D1ILD9	2	Whole genome shotgun sequence of line PN40024, scaffold_30.assembly12x (Fragment)	Vitis vinifera	0.0017768	0.00358979	0	0	0.00384969	0	0	0.00195926	0	0.00146486	0	0	0	0	0	0	0	0
228	UniRef100_A4W9R6	13	LPP repeat-containing protein	Enterobacter sp. 638	0	0.00552126	0	0	0	0	0	0.00602686	0	0.00450604	0.0130734	0.00484253	0.007866	0.00964602	0.0126463	0.00375442	0.00550072	0.00397166
229	UniRef100_A2QMY6	8	Superoxide dismutase [Cu-Zn]	Aspergillus niger CBS 513.88	0	0	0.00265657	0	0	0.00267301	0.00472354	0	0.00197636	0	0	0.00500576	0.00203279	0	0	0	0	0.00205277
230	UniRef100_C7YTN8	2	Predicted protein	Nectria haematococca mpVI 77-13-4	0	0.00131936	0	0	0.00141489	0	0	0	0	0	0.00156202	0	0	0.00230502	0.00100733	0.000897159	0	0.000949072
231	UniRef100_A9PIP9	6	Putative uncharacterized protein	Populus trichocarpa x Populus deltoides	0.00134808	0	0	0	0	0	0.00112706	0	0	0.00111141	0.00322454	0.0011944	0.00291021	0	0	0.00185204	0.00135675	0.000979605
232	UniRef100_Q2H6T6	1	Malate dehydrogenase	Chaetomium globosum	0	0	0	0	0	0	0	0	0	0	0	0.00135004	0	0.0013446	0.00117521	0.00104669	0	0
233	UniRef100_B1LWS4	1	Elongation factor Tu	Methylobacterium radiotolerans JCM 2831	0	0	0	0	0	0.0012015	0.0010616	0.00140018	0	0.00104686	0	0	0.00182746	0.0011205	0.000979344	0.000872238	0.00127795	0
234	UniRef100_A6N5L8	10	Predicted ATPase terminase subunit	Pseudomonas aeruginosa	0	0.000850847	0.000792076	0	0	0.00239093	0.000704179	0.000928763	0.000589267	0.000694398	0	0	0	0.000743245	0	0	0.00169536	0.000612048
235	UniRef100_A1TSA1	15	OmpA/MotB domain protein	Acidovorax citrulli AAC00-1	0	0	0	0	0	0	0	0.00228177	0	0	0	0.00183339	0.00148904	0.001826	0.00159597	0.00142142	0.00208258	0
236	UniRef100_B4YYB3	12	ST103-2	Thellungiella halophila	0	0	0.00487494	0.00450584	0.00561578	0.00490511	0.00433397	0.0057162	0.00362673	0	0	0.00459292	0	0	0.00399815	0.00356089	0.00521718	0.00753387
237	UniRef100_A7IZK8	1	Vacuolar invertase	Coffea canephora	0	0.00173364	0.000806945	0	0	0	0	0	0	0.000707433	0.00102624	0	0	0.00151439	0	0	0.000863594	0
238	UniRef100_Q7Z8P9	1	Nucleoside diphosphate kinase	Aspergillus fumigatus	0	0.00331997	0	0.00285664	0	0	0.00274768	0	0.0022993	0	0	0	0	0	0	0.00225756	0	0.00238819
239	UniRef100_A6RUE0	11	60S ribosomal protein L17	Botryotinia fuckeliana B05.10	0	0	0	0	0	0	0	0	0.00121728	0.00143445	0.00208089	0.00154157	0.00125203	0	0.00134194	0.00119518	0	0
240	UniRef100_Q7XB19	1	Ubiquitin/actin fusion protein (Fragment)	Gymnochlora stellata	0	0	0.00106984	0	0.00123242	0	0.000951119	0.00125446	0.000795911	0	0	0.00100795	0	0.00200777	0.000877422	0.00156292	0	0.00165336
241	UniRef100_A4RCB4	4	Putative uncharacterized protein	Magnaporthe grisea	0	0	0.00162219	0.000749685	0	0.00163223	0.000721089	0	0.000603418	0.000711073	0	0	0	0	0.000665215	0	0	0
242	UniRef100_B4FHM1	11	Putative uncharacterized protein	Zea mays	0.00157629	0	0	0	0	0	0.00131785	0.00173815	0	0.00129955	0	0	0	0	0	0	0	0
243	UniRef100_B9T155	1	Thylakoid lumenal 25.6 kDa protein, chloroplast, putative	Ricinus communis	0	0.00209899	0	0.00180606	0.00225095	0	0.00173717	0.00458241	0	0.00171304	0.00497005	0	0.00299038	0.00183354	0	0.0014273	0.00209118	0
244	UniRef100_A4U4D2	1	DNA-directed RNA polymerase	Magnetospirillum gryphiswaldense	0	0	0	0	0	0	0	0	0	0	0	0	0	0	0.000259412	0.000231041	0	0.00024441
245	UniRef100_B6H0D9	2	Pc12g06430 protein	Penicillium chrysogenum Wisconsin 54-1255	0	0	0.00101041	0	0.00116396	0	0	0	0	0.000885802	0	0.00095195	0.00231946	0.000948113	0	0.000738047	0	0.00156151
246	UniRef100_B8LFH7	3	Cyclophilin	Ipomoea batatas	0	0	0.0054667	0	0	0.00825079	0.00243003	0	0.00203348	0.00479255	0	0.00772566	0.00418308	0.00256484	0	0.00399314	0	0.00422419
247	UniRef100_A9PA01	10	Predicted protein	Populus trichocarpa	0	0.00219894	0.00204705	0.00189206	0.00235814	0	0.00181989	0	0	0.00179461	0	0.00578588	0.00156639	0	0.00335775	0.00299053	0	0.00474536
248	UniRef100_C6DJ47	1	Fimbrial protein	Pectobacterium carotovorum subsp. carotovorum PC1	0	0	0	0	0	0	0	0	0	0	0	0	0	0	0.0020199	0.00179899	0	0
249	UniRef100_B9GF37	1	Predicted protein	Populus trichocarpa	0	0.00132973	0	0	0.002852	0	0.00110051	0.00290299	0	0.00108522	0	0	0.000947215	0.00116156	0	0.00180841	0.00132478	0
250	UniRef100_A2QN66	3	Putative frameshift	Aspergillus niger CBS 513.88	0.00105196	0	0	0	0	0.000995388	0	0	0	0	0	0	0	0	0.00081134	0.000722607	0	0
251	UniRef100_A7ELT7	1	Peptidyl-prolyl cis-trans isomerase	Sclerotinia sclerotiorum 1980 UF-70	0	0	0	0	0	0	0.00486005	0.00320504	0	0.00718882	0.00347616	0.00257522	0.00627462	0.00256484	0	0.00798627	0.00292524	0
252	UniRef100_Q8RXI1	2	Putative chloroplast nucleoid DNA-binding protein	Arabidopsis thaliana	0	0	0	0	0	0	0	0	0	0	0.00120275	0.00178205	0.000723672	0	0.00155128	0.000690812	0.00101213	0.00146157
253	UniRef100_A3FMB9	30	Proteasome subunit alpha type	Zea mays	0	0.00588365	0	0.00168751	0	0	0.00162315	0.00214082	0	0	0	0	0.0027941	0	0	0.00133361	0.00195392	0
254	UniRef100_P48210	2	60 kDa chaperonin	Bordetella pertussis	0	0	0	0	0.000995852	0	0.000768546	0.00202732	0.000643131	0	0	0	0.00132298	0.00162237	0	0	0	0
255	UniRef100_Q2GUM4	1	Putative uncharacterized protein	Chaetomium globosum	0	0	0	0	0	0	0	0	0	0.00184247	0.00267278	0	0.00241224	0.00197208	0.00258547	0.000767569	0.00224918	0.00243595
256	UniRef100_C5FG71	1	Peroxisomal hydratase-dehydrogenase-epimerase	Microsporum canis CBS 113480	0	0.000568183	0	0.00146666	0	0.00053221	0	0.000620214	0.000393504	0	0	0	0	0	0	0	0	0.000408717
257	UniRef100_A9PH26	2	Putative uncharacterized protein	Populus trichocarpa	0	0	0	0	0.00157665	0	0	0.000802419	0	0.000599936	0.0017406	0	0.000523641	0	0	0	0	0
258	UniRef100_C7BFZ4	1	Isoflavone reductase-like protein	Coffea arabica	0	0	0	0	0	0	0	0	0	0.00132024	0.00191521	0.00141883	0.00115234	0	0.0012351	0.00110002	0.00161168	0
259	UniRef100_B6GXL6	5	Pc12g04310 protein	Penicillium chrysogenum Wisconsin 54-1255	0	0	0	0	0	0	0	0	0	0.000915134	0.00132754	0.00196694	0.000798755	0.00293852	0	0.00152497	0.00223429	0.000806606
260	UniRef100_B9RHY4	1	Phosphoglycerate kinase	Ricinus communis	0	0.00106045	0	0	0	0	0.000877651	0	0	0.00086546	0	0	0	0	0	0	0	0
261	UniRef100_UPI00016E81C7		UPI00016E81C7 related cluster	Takifugu rubripes	0	0	0	0	0.00109825	0	0	0	0	0	0	0	0	0	0	0	0	0
262	UniRef100_O48902	2	Malate dehydrogenase [NADP], chloroplastic	Medicago sativa	0.00228043	0	0.00107227	0.00099108	0.00123522	0	0.00190655	0.0012573	0.000797716	0.00282011	0	0	0.00082049	0.00100616	0.000879411	0.00156647	0	0
263	UniRef100_A9NKY2	4	Putative uncharacterized protein	Picea sitchensis	0	0	0	0.00165555	0.00206338	0	0.0015924	0	0	0.00471086	0.00455588	0.00168755	0	0.00336149	0.00146902	0.00261671	0.00383384	0
264	UniRef100_A4R592	2	Aspartate aminotransferase	Magnaporthe grisea	0	0	0.00310418	0	0	0.00104113	0	0	0.00153957	0	0	0	0	0	0	0	0	0.000799546
265	UniRef100_UPI000023E582	1	hypothetical protein FG09739.1	Gibberella zeae PH-1	0	0	0.00342659	0	0	0.00114926	0	0	0.00169948	0	0	0	0	0	0	0	0	0.000882591
266	UniRef100_B6HCW6	1	Mitochondrial ADP/ATP carrier BAC82547-Penicillium chrysogenum	Penicillium chrysogenum Wisconsin 54-1255	0.0015963	0	0.00150117	0.00277502	0	0.00151046	0.00133459	0	0	0	0	0	0.00229737	0.00422588	0	0	0	0
267	UniRef100_B9N9W5	4	Predicted protein	Populus trichocarpa	0.000767687	0	0.000721938	0.00200183	0.000831651	0.000726405	0.000641824	0.000846521	0	0	0	0	0	0	0	0	0	0
268	UniRef100_A7EQJ7	14	Phosphorylase	Sclerotinia sclerotiorum 1980 UF-70	0	0	0	0.000230399	0	0.000250815	0	0	0.000185447	0	0	0	0	0	0	0	0	0
269	UniRef100_A1CF77	20	Coatomer subunit gamma, putative	Aspergillus clavatus	0.000538944	0.000544432	0.00152048	0	0	0.00101993	0.000450584	0	0.000754111	0	0	0.000477506	0	0	0	0	0	0.000391632
270	UniRef100_A8N7C6	1	40S ribosomal protein S0	Coprinopsis cinerea okayama7#130	0	0	0	0	0	0	0	0	0.00119252	0	0	0.00151021	0	0.00150413	0.00131465	0.00234174	0.00171548	0.00123862
271	UniRef100_A6SHK9	2	Putative uncharacterized protein	Botryotinia fuckeliana B05.10	0	0	0.000615716	0	0	0	0	0	0	0.000539786	0	0	0	0	0	0	0	0
272	UniRef100_A4R931	4	Histone H4	Pezizomycotina	0	0	0	0	0	0	0	0	0.00117264	0	0	0	0	0	0	0	0	0
273	UniRef100_UPI0000382857		hypothetical protein Magn03001403	Magnetospirillum magnetotacticum MS-1	0	0	0	0	0	0	0.00347434	0	0	0	0	0	0	0	0	0	0	0
274	UniRef100_D0T720	1	Predicted protein	Acinetobacter radioresistens	0.00845101	0.00853707	0.00397369	0	0.00915514	0.0119948	0.00353273	0.0139783	0.00886872	0	0	0	0	0	0	0	0	0
275	UniRef100_A0ZZ21	1	ATP synthase subunit b, chloroplastic	Gossypium	0.0054656	0.00276063	0	0.00475072	0.00592099	0	0.00685426	0	0.00382383	0	0	0	0	0	0	0.00187721	0	0.00198583
276	UniRef100_B9D2W6	1	ATPase, AAA family protein	Campylobacter rectus RM3267	0	0	0.000748211	0	0	0.000752841	0.000665181	0	0	0	0.000951545	0.000704925	0.000572526	0.000702084	0.00061364	0	0	0
277	UniRef100_Q5ZE49	1	Putative uncharacterized protein P0006C01.45	Oryza sativa Japonica Group	0	0	0.00656763	0	0.00756571	0	0.00583881	0	0.00488601	0	0	0	0.010051	0	0	0	0	0
278	UniRef100_A1IIE3	10	Malate dehydrogenase (Fragment)	Iris x hollandica	0	0	0.00142431	0	0	0	0.00126625	0	0	0	0	0	0	0	0	0	0	0.00110058
279	UniRef100_B7JNY1	1	Putative uncharacterized protein	Bacillus cereus AH820	0	0	0	0	0	0	0	0	0	0	0	0	0.000580796	0	0	0	0	0
280	UniRef100_A1DNC2	7	ATP citrate lyase, subunit 1, putative	Neosartorya fischeri NRRL 181	0.000693566	0	0	0	0	0.00131254	0.000579855	0	0.00194092	0	0	0.0006145	0	0	0.00106985	0	0	0
281	UniRef100_A5ASW8	3	Putative uncharacterized protein	Vitis vinifera	0.00194897	0	0.00366566	0.00338811	0	0.00553251	0.00162944	0	0.00272707	0	0	0.00172679	0.00140247	0	0.00150318	0	0	0.0028325
282	UniRef100_P37211	1	ATP synthase subunit alpha, mitochondrial	Neurospora crassa	0	0	0.00171641	0.000793224	0	0.00345405	0	0	0.00191539	0	0	0	0	0	0	0	0	0.000663145
283	UniRef100_B2W2V5	1	ADP,ATP carrier protein	Pyrenophora tritici-repentis Pt-1C-BFP	0	0	0.0045323	0	0	0.00152011	0	0	0.00449575	0	0	0.00284673	0	0	0.00247809	0	0	0.00116739
284	UniRef100_B9HEW3	2	Predicted protein (Fragment)	Populus trichocarpa	0.000794368	0.000802457	0	0.000690468	0.000860555	0.0015033	0.000664131	0.000875942	0.000555754	0	0	0.000703812	0	0	0.00061267	0	0	0
285	UniRef100_A5AZX9	4	Triosephosphate isomerase	Vitis vinifera	0	0.00197648	0	0	0.00211958	0	0	0.00215748	0.00136884	0	0	0	0.00140792	0	0.00150903	0.00134399	0.00196913	0
286	UniRef100_B3TLP2	1	Light-inducible protein ATLS1	Elaeis guineensis	0.00437248	0	0	0.00380058	0	0	0.00731121	0	0	0.00720966	0	0	0.0031464	0	0	0.00300353	0	0
287	UniRef100_Q94I89	2	Putative NtPRp27-like protein (Fragment)	Atropa belladonna	0	0	0	0	0	0	0.00173717	0	0.00145369	0.00342608	0	0.00552289	0	0	0.00160256	0.0014273	0	0.00452966
288	UniRef100_B2B2M8	1	Predicted CDS Pa_6_2660	Podospora anserina	0	0	0	0	0	0	0	0	0	0.000490598	0.000711688	0	0	0	0	0	0	0
289	UniRef100_B1W0S5	11	Trypsin	Streptomyces griseus	0	0	0	0	0	0	0	0	0	0	0	0	0.00124342	0.0015248	0	0	0	0.00251129
290	UniRef100_C7YMF8	2	Predicted protein	Nectria haematococca mpVI 77-13-4	0	0	0	0	0	0	0	0	0.00134786	0	0	0	0	0	0	0	0	0
291	UniRef100_A9EV31	1	Putative uncharacterized protein	Sorangium cellulosum 'So ce 56'	0	0.000846592	0	0	0	0	0	0.000924119	0	0.00138185	0.00300688	0	0.00120612	0.00147906	0	0.00115135	0.00168689	0
292	UniRef100_A4QZX7	6	Putative uncharacterized protein	Magnaporthe grisea	0	0.00088494	0.000823815	0	0.000949009	0	0	0.000965978	0	0	0.00104769	0.000776155	0.00126075	0	0.000675645	0.00120351	0.000881649	0.000636573
293	UniRef100_C8VUL6	3	Hypothetical serine protease (Eurofung)	Aspergillus nidulans FGSC A4	0.00119155	0	0	0.00155355	0	0.00112748	0.000498098	0	0.000833632	0	0	0.000527859	0	0	0	0	0	0
294	UniRef100_A8DNH8	9	Alpha tubulin (Fragment)	Hypocreales	0.0011199	0	0	0.00194684	0.00121321	0.00211936	0.000936291	0	0.00313401	0	0	0.000992233	0	0	0.00172748	0	0	0
295	UniRef100_A6RKG7	2	Putative uncharacterized protein	Botryotinia fuckeliana B05.10	0.00121165	0	0.00113944	0.00105317	0	0.0011465	0.001013	0	0.00169539	0.000998929	0	0	0	0	0.000934507	0	0	0
296	UniRef100_A2R932	9	Complex: SSB2 of S. cerevisiae binds to ribosomes and nascent polypeptide chains	Aspergillus niger	0.000804536	0.000812729	0.000756591	0.00139861	0.00087157	0.00152255	0.000672631	0.000887154	0.00112574	0	0	0	0	0	0.000620513	0	0	0.000584628
297	UniRef100_A8IXT9	23	Temperature-induced lipocalin	Brassica rapa	0.00268896	0.00271634	0	0	0.002913	0	0	0.00296509	0	0.00221687	0	0.00238242	0	0.00474564	0.00207391	0.00184709	0	0
298	UniRef100_B8DCY6	5	D-isomer specific 2-hydroxyacid dehydrogenase family protein	Listeria monocytogenes	0	0	0	0.00216906	0.00135169	0.00118063	0.00104316	0	0	0	0	0.00110549	0	0	0.000962333	0	0	0
299	UniRef100_A0JZJ7	116	Aldehyde dehydrogenase (NAD(+))	Arthrobacter sp. FB24	0	0	0	0	0.000935964	0.000817518	0	0.0019054	0	0.000712295	0	0	0.00124342	0.0015248	0	0.000593481	0	0
300	UniRef100_A5K8M0	3	ATP synthase subunit beta	Plasmodium vivax	0	0	0	0	0	0.000851155	0	0	0	0	0	0	0	0	0	0	0	0
301	UniRef100_A2QSB1	80	Function: the Gsp1	Aspergillus niger CBS 513.88	0	0.00217075	0	0	0	0	0	0	0.00300677	0.0017716	0.00256998	0	0	0	0	0.00147609	0	0
302	UniRef100_A6STD0	7	40S ribosomal protein S20	Botryotinia fuckeliana B05.10	0	0	0	0	0	0	0	0	0	0	0.00513997	0	0	0	0	0	0	0
303	UniRef100_A1CH83	21	Pyruvate carboxylase, putative	Aspergillus clavatus	0	0	0	0.000353328	0	0	0	0	0	0	0	0	0	0	0	0	0	0
304	UniRef100_C7YR12	2	Predicted protein	Nectria haematococca mpVI 77-13-4	0	0	0	0.00305641	0.00380931	0	0	0	0.00246009	0	0	0.00311547	0.00506065	0.00310292	0.00271203	0.00483086	0.00353893	0.00255519
305	UniRef100_A1C653	10	Heat shock protein 70 (Hsp70)	Aspergillus clavatus	0	0	0	0.000638053	0	0	0	0	0	0	0	0	0	0	0	0	0	0
306	UniRef100_Q00070	1	Pepsinogen	Aspergillus niger	0	0	0.00237623	0.00219631	0	0.00119547	0.00211254	0	0.0017678	0	0	0	0	0	0.00292327	0	0.00127152	0.000918072
307	UniRef100_Q9ZRU8	1	Stress and pathogenesis-related protein	Fagus sylvatica	0	0	0	0.00273166	0	0	0.0105099	0.00346545	0.0021987	0	0	0	0	0	0	0	0	0
308	UniRef100_Q883Q1	1	Outer membrane porin OprF	Pseudomonas syringae pv. tomato	0.00146173	0	0.00137462	0	0	0.00138313	0.00122208	0	0.00204531	0.0012051	0.00174819	0.0012951	0	0	0.00112738	0.00100409	0	0.00212438
309	UniRef100_B2AMK1	7	Predicted CDS Pa_5_7040	Podospora anserina	0	0	0.00238823	0	0	0	0	0	0	0.00104686	0	0.00450013	0	0	0.00195869	0	0	0.00369083
310	UniRef100_A4RV66	4	Ribosomal protein L12, component of cytosolic 80S ribosome and 60S large subunit	Ostreococcus lucimarinus CCE9901	0	0.0022085	0.00205595	0.00570086	0.00473679	0	0.00365561	0	0.00152953	0	0	0	0	0.0019292	0	0.00150177	0.00220029	0
311	UniRef100_C7YKD6	2	Putative uncharacterized protein	Nectria haematococca mpVI 77-13-4	0	0	0	0	0	0.000531615	0	0	0.000393064	0	0.000671929	0.00049778	0.000404286	0.000991547	0.000433319	0.000385929	0.000565437	0
312	UniRef100_B6HHG9	1	Pc21g00870 protein	Penicillium chrysogenum Wisconsin 54-1255	0	0	0	0	0	0	0	0	0	0	0	0	0	0	0.00157331	0	0	0.00148232
313	UniRef100_UPI00019841D8		PREDICTED: hypothetical protein isoform 1	Vitis vinifera	0	0	0	0	0	0	0	0.00149051	0	0	0	0.00119762	0.000972678	0.00119279	0	0.000928511	0.00272079	0.000982238
314	UniRef100_A6XHH1	1	Superoxide dismutase (Fragment)	Fagus sylvatica	0.00632497	0.00319469	0	0.00274884	0	0	0.00528798	0	0	0.00521454	0	0	0.0022757	0	0	0.00434473	0.00318281	0
315	UniRef100_C6SW24	2	Putative uncharacterized protein	Glycine max	0	0	0.00231799	0.00214248	0	0	0	0	0.00172447	0	0.00294792	0	0	0.00217508	0	0.00169317	0.00248072	0
316	UniRef100_A0A4J9	11	Beta tubulin (Fragment)	Thaumatomonas sp. TMT002	0	0	0	0	0	0	0	0	0	0	0	0	0	0.00102712	0.000897732	0	0.00117145	0
317	UniRef100_Q55T85	9	Putative uncharacterized protein	Filobasidiella neoformans	0	0	0.0017258	0.00159513	0	0.00086824	0.000767143	0.00101181	0.000641957	0	0	0	0	0	0	0	0	0
318	UniRef100_P27774	1	Phosphoribulokinase, chloroplastic	Mesembryanthemum crystallinum	0.00126659	0	0	0.00110092	0	0	0.00211786	0	0	0	0	0	0.000911426	0	0	0	0	0
319	UniRef100_C6Y271	1	Elongation factor Tu	Pedobacter heparinus DSM 2366	0	0.00128596	0	0.0011065	0.00275813	0	0	0.00280745	0	0	0	0	0.000916041	0	0	0	0	0
320	UniRef100_UPI000023D878	1	hypothetical protein FG05972.1	Gibberella zeae PH-1	0.00633826	0	0	0.00367282	0	0	0.00353273	0	0	0.00522549	0	0	0.00152032	0	0	0.00290257	0	0
321	UniRef100_A7KNG1	18	Cytochrome c oxidase subunit 2 (Fragment)	Arabidopsis thaliana	0	0	0	0	0	0	0.000955442	0	0	0.000942172	0	0	0.000822355	0	0.00088141	0.000785014	0.00115015	0
322	UniRef100_A6FHK9	1	Putative uncharacterized protein	Moritella sp. PE36	0	0	0.00543528	0	0	0	0	0.00637323	0	0	0.00691237	0.00512084	0	0	0	0	0	0
323	UniRef100_Q2HBC5	1	Putative uncharacterized protein	Chaetomium globosum	0.000976379	0	0.000918193	0	0	0.000923875	0	0	0.00136618	0.000804962	0	0.000865073	0	0	0.000753049	0.000670692	0	0.0007095
324	UniRef100_Q9S886	1	Basic chitinase (Fragment)	Citrus sinensis	0	0	0	0	0	0	0	0	0	0	0.0214777	0	0	0	0.0277015	0.0123359	0	0.0130497
325	UniRef100_C9SIM8	1	DNA damage checkpoint protein rad24	Verticillium albo-atrum VaMs.102	0	0	0	0	0	0	0	0	0	0.00151852	0.00220284	0	0.00132541	0	0	0	0.00185372	0.00133843
326	UniRef100_P47919	3	Nucleoside diphosphate kinase A	Flaveria bidentis	0	0	0	0.00295315	0.00368062	0	0.0028405	0	0	0.00280105	0	0	0.00244484	0	0	0.00466765	0.00341937	0.00246887
327	UniRef100_A3QVX4	46	Glucose-6-phosphate isomerase	Marchantia polymorpha	0	0	0	0.000663226	0	0	0	0	0	0.000629068	0	0	0.000549069	0	0	0.000524137	0	0
328	UniRef100_P84721	1	Putative NAD(P)-dependent glyceraldehyde-3-phosphate dehydrogenase PS5 (Fragments)	Pinus strobus	0	0	0	0	0	0	0	0	0	0	0	0	0	0	0	0	0.0126517	0
329	UniRef100_B2A1Z7	1	Putative uncharacterized protein	Natranaerobius thermophilus JW/NM-WN-LF	0	0	0	0	0	0	0	0	0	0	0	0	0	0	0	0.000669392	0	0
330	UniRef100_B8M045	1	Ribosomal protein S13p/S18e	Talaromyces stipitatus ATCC 10500	0	0	0	0	0	0.00291899	0	0	0	0	0	0.00273321	0	0	0	0	0	0
331	UniRef100_C5ALD9	1	Rhs family protein	Burkholderia glumae BGR1	0	0	0	0	0	0	0	0	0	0	0	0.000392177	0	0	0	0	0	0
332	UniRef100_A9NYS4	10	Proteasome subunit beta type	Picea sitchensis	0	0	0	0	0	0	0	0	0	0	0	0	0	0	0	0	0.00186054	0
333	UniRef100_A7QEU4	3	Peroxidase 5	Vitis vinifera	0	0	0	0	0	0	0	0	0	0.000722222	0.00104769	0.00155231	0.00126075	0	0.000675645	0	0.000881649	0
334	UniRef100_A4UCI5	12	Putative uncharacterized protein	Magnaporthe grisea	0	0	0	0	0	0	0	0	0	0.00103639	0	0	0.00180918	0	0	0	0.00126517	0.000913482
335	UniRef100_B9IJN4	5	Predicted protein	Populus trichocarpa	0	0	0	0	0	0	0	0	0	0	0	0	0	0.00095423	0	0.00148562	0	0.000785791
336	UniRef100_B2FPR0	2	Putative TonB dependent receptor	Stenotrophomonas maltophilia K279a	0	0.000538088	0.00100184	0	0	0.000504021	0	0.000587364	0.000372662	0	0	0	0	0	0.000410827	0	0	0.000387068
337	UniRef100_B2B0U9	3	Predicted CDS Pa_3_7380 (Fragment)	Podospora anserina	0	0	0	0	0	0	0	0	0.00051507	0	0	0	0	0	0	0	0	0
338	UniRef100_A0A330	126	Photosystem II D2 protein	core eudicotyledons	0.00141644	0	0.00133203	0.00123117	0.00153445	0.00134027	0.00118421	0	0	0.00116776	0	0.00125497	0.00203851	0	0.00109245	0	0	0.00102928
339	UniRef100_D1IFH6	1	Whole genome shotgun sequence of line PN40024, scaffold_26.assembly12x (Fragment)	Vitis vinifera	0	0.000944155	0.00175788	0	0.00202502	0.00176876	0	0	0.00130778	0	0	0	0	0	0.000720856	0	0	0.000679168
340	UniRef100_B6XD36	1	Putative uncharacterized protein	Providencia alcalifaciens DSM 30120	0.0041216	0.00416357	0	0.00716502	0.00893002	0.00389996	0	0.00454485	0	0	0	0	0	0	0	0	0	0.00299502
341	UniRef100_A2QDM7	21	Catalytic activity: alpha-D-Glucose 1-phosphate = alpha-D-Glucose 6-phosphate	Aspergillus niger CBS 513.88	0.000623865	0	0	0	0	0	0	0	0.000436467	0	0	0.000552745	0.000448928	0	0.000962333	0.000428544	0	0.000453341
342	UniRef100_A2R9F2	12	Remark: manual BLASTP homologue PIR:DERTCM	Aspergillus niger CBS 513.88	0	0	0	0	0	0.00101666	0	0	0.00225508	0	0	0.00095195	0	0	0	0	0	0.00234226
343	UniRef100_B2AAR4	4	Predicted CDS Pa_1_4920	Podospora anserina	0	0	0.00199523	0	0	0.00200758	0	0	0.00148436	0	0	0	0	0.00187222	0.00163637	0	0	0.00462522
344	UniRef100_C7QBH5	1	Transcriptional regulator, XRE family	Catenulispora acidiphila DSM 44928	0	0	0.00117923	0	0	0	0.00104837	0	0	0	0	0	0.000902335	0	0	0	0.00126201	0
345	UniRef100_Q5K8H5	1	Histone H4	Filobasidiella neoformans	0	0	0	0	0	0	0	0	0	0	0.00583861	0.00432537	0	0	0	0	0	0
346	UniRef100_A6RW23	2	Putative uncharacterized protein	Botryotinia fuckeliana B05.10	0	0	0	0.00161279	0	0	0	0	0	0	0.0022191	0	0	0.00163733	0	0	0.0018674	0
347	UniRef100_Q01294	1	Vacuolar protease A	Neurospora crassa	0	0	0	0	0	0.0012015	0	0	0.000888365	0	0	0	0	0	0	0	0	0
348	UniRef100_C2M3V7	1	Chaperone and heat shock protein 70	Capnocytophaga gingivalis ATCC 33624	0	0	0	0	0.000926413	0	0	0.000942978	0	0	0	0	0	0	0	0	0	0
349	UniRef100_Q3V2E0	3	Putative uncharacterized protein	Mus musculus	0	0	0	0	0	0	0	0	0	0	0	0	0.00141897	0	0	0	0	0
350	UniRef100_A7BLS3	2	Putative uncharacterized protein	Beggiatoa sp. SS	0	0	0	0	0	0	0	0	0.000365689	0	0	0	0	0	0	0	0	0
351	UniRef100_B9S1F6	1	Protein dif-1, putative	Ricinus communis	0	0.00171029	0	0	0	0	0	0	0	0	0	0	0	0.001494	0	0	0.00170393	0
352	UniRef100_C9SKV4	1	Stomatin-2	Verticillium albo-atrum VaMs.102	0	0	0	0	0	0	0	0	0	0	0.00354794	0	0.00106736	0.0013089	0	0	0	0
353	UniRef100_Q68KY2	1	Beta-glucosidase	Phaeosphaeria avenaria f. sp. triticae	0	0	0.000541041	0	0	0	0	0	0	0.00047432	0	0.00101948	0	0	0	0	0	0.000418069
354	UniRef100_C6RM02	1	Putative uncharacterized protein	Acinetobacter radioresistens	0.00492976	0.00497996	0	0	0.010681	0	0.00824303	0.010872	0	0	0	0	0	0	0	0	0	0
355	UniRef100_D0T5P6	1	Putative uncharacterized protein	Acinetobacter radioresistens SH164	0.00255246	0.00257845	0	0	0.00276513	0	0.00426797	0.00281458	0	0	0	0	0	0	0	0	0	0
356	UniRef100_A2IBY3	30	OmpE36	Enterobacter aerogenes	0	0.00134025	0.00124768	0	0	0	0	0.00146298	0.000928213	0.00218763	0.00158675	0.0011755	0	0.00117076	0.00102327	0	0.00133527	0
357	UniRef100_P12355	1	Photosystem I reaction center subunit III, chloroplastic	Spinacia oleracea	0.00435355	0.00219894	0.00204705	0.00189206	0.00235814	0.00411944	0.00181989	0	0.00304582	0	0	0	0	0	0	0	0	0
358	UniRef100_A4UBZ2	5	Putative uncharacterized protein	Magnaporthe grisea	0	0	0.000537963	0	0	0	0	0.000630798	0	0	0.00136832	0.000506841	0.000823291	0	0.000882413	0	0	0.000415691
359	UniRef100_A4QYX6	1	Putative uncharacterized protein	Magnaporthe grisea	0	0	0	0	0	0	0	0	0	0.000925347	0	0.0019889	0.00080767	0	0.00173134	0.00154199	0	0
360	UniRef100_A7Y7M4	1	Malic enzyme (Fragment)	Prunus dulcis	0	0	0	0	0	0	0	0	0	0.00538384	0	0.00385725	0.00156639	0	0	0.00299053	0.00219076	0
361	UniRef100_B5H9S4	2	Streptogrisin-B	Streptomyces pristinaespiralis ATCC 25486	0	0	0	0	0	0	0	0	0	0.00138185	0.00200459	0.00148504	0.00241224	0.00147906	0.00129273	0.00115135	0.00168689	0.00121798
362	UniRef100_A9QBZ4	57	ATP synthase epsilon chain (Fragment)	Scaevola aemula	0	0	0	0	0	0	0.00300282	0	0	0.00296111	0.00429555	0	0.00258454	0.00316941	0	0.00493437	0.00361476	0
363	UniRef100_Q8J0C0	2	Histone H4 (Fragment)	Glomerellaceae	0	0	0	0	0	0	0	0	0	0	0	0	0.00565369	0.00693308	0.00605969	0	0	0
364	UniRef100_C3X6U1	1	Predicted protein	Oxalobacter formigenes HOxBLS	0	0	0	0	0	0	0	0	0	0.00241021	0	0	0	0	0	0	0	0
365	UniRef100_B8EI95	1	Glyceraldehyde-3-phosphate dehydrogenase, type I	Methylocella silvestris BL2	0	0.00151629	0	0	0	0.00142029	0	0.00165514	0	0.00123748	0	0	0.00108011	0	0.00231535	0.00103106	0.00151065	0.00109072
366	UniRef100_A1C5D0	47	Proteasome subunit alpha type	Aspergillus clavatus	0	0	0	0	0	0	0	0.00152327	0.000966463	0	0	0	0	0	0	0	0	0
367	UniRef100_Q9UXV3	1	Predicted ATPase of the PP-loop superfamily	Pyrococcus abyssi	0	0	0	0	0	0	0	0	0	0	0	0	0	0	0	0.00126061	0	0
368	UniRef100_UPI0001AF40C7		OprF	Pseudomonas syringae pv. oryzae str. 1_6	0	0	0	0	0	0	0	0	0	0	0.00174819	0.0012951	0.00105185	0	0	0	0	0
369	UniRef100_UPI0001662ABB		PREDICTED: similar to actin alpha 1 skeletal muscle protein	Homo sapiens	0	0	0	0	0	0.00102542	0	0	0.000758174	0	0.00129607	0	0.000779819	0	0	0.00074441	0	0
370	UniRef100_Q9FRW7	1	Aspartic proteinase 3	Nepenthes alata	0	0	0	0	0	0.000938453	0	0	0	0	0	0	0	0	0	0	0	0
371	UniRef100_A9BMM5	1	Membrane-associated zinc metalloprotease	Delftia acidovorans SPH-1	0	0	0.00103699	0	0	0	0	0	0	0	0	0.000977002	0	0	0	0	0	0
372	UniRef100_B2VU09	1	Aldehyde dehydrogenase	Pyrenophora tritici-repentis Pt-1C-BFP	0	0	0	0.000875884	0	0	0	0	0	0	0	0	0	0	0	0	0	0.00073225
373	UniRef100_Q59IV3	1	Putative mitochondrial dicarboxylate transporter	Mesembryanthemum crystallinum	0	0.00324572	0	0	0	0	0	0	0	0	0	0	0.00115603	0	0	0	0.00161683	0
374	UniRef100_P0C0Y5	2	Probable NADP-dependent mannitol dehydrogenase	Davidiella tassiana	0	0	0.00177105	0	0	0	0	0	0	0	0	0	0	0	0	0	0	0
375	UniRef100_A1CPG7	32	Mitogen-activated protein kinase hog1	Aspergillus clavatus	0	0	0.00249535	0.00115321	0	0.00251079	0	0	0.00185643	0	0	0.0011755	0	0	0	0	0	0.00192819
376	UniRef100_Q2HTU3	1	Ubiquitin	Medicago truncatula	0.000934638	0.000944155	0.00087894	0.000812391	0.00101251	0.000884378	0.000781403	0.00103062	0.000653889	0	0	0	0	0	0.000720856	0	0	0
377	UniRef100_P46281	5	Carbonic anhydrase	Flaveria pringlei	0.00152374	0.00153926	0	0.00132444	0.0016507	0	0.00127392	0.00168022	0	0	0	0	0.00109647	0	0	0.00209337	0	0
378	UniRef100_B6SZT9	3	Chlorophyll a-b binding protein	Zea mays	0	0	0	0.00168102	0	0.00182998	0	0	0.0027061	0	0	0.00171351	0.00139168	0	0	0	0	0.00281071
379	UniRef100_D1IVU2	1	Whole genome shotgun sequence of line PN40024, scaffold_44.assembly12x (Fragment)	Vitis vinifera	0.00108137	0	0	0	0	0	0.00180815	0	0	0	0	0	0	0	0	0.00148562	0	0
380	UniRef100_B2W0U7	2	NADP-specific glutamate dehydrogenase	Pyrenophora tritici-repentis Pt-1C-BFP	0	0	0	0.000964826	0.0012025	0	0.000928023	0	0	0	0	0.000983472	0	0	0.000856116	0	0	0.00161321
381	UniRef100_A3WF44	6	60 kDa chaperonin	Erythrobacter sp. NAP1	0.000914246	0	0	0	0.00099042	0.00173017	0.000764354	0.00100813	0	0	0	0	0	0	0	0	0	0
382	UniRef100_A1CU27	2	Aldehyde dehydrogenase	Aspergillus clavatus	0	0	0	0	0	0	0	0	0	0	0.00242003	0	0	0	0	0	0.00101824	0
383	UniRef100_O48906	2	Malate dehydrogenase	Medicago sativa	0	0	0	0	0	0	0	0	0	0	0	0	0.000886853	0	0	0.00169317	0	0
384	UniRef100_A6R6G3	10	Ribosomal protein L7a	Ajellomyces capsulatus NAm1	0	0	0	0	0	0	0	0	0	0	0	0.000935951	0	0	0	0	0	0
385	UniRef100_B8M0Y3	1	Ribosomal protein L18	Talaromyces stipitatus ATCC 10500	0	0	0	0	0	0	0	0	0	0	0.00326835	0	0.0019665	0	0	0	0	0
386	UniRef100_Q56YA5	1	Serine--glyoxylate aminotransferase	Arabidopsis thaliana	0	0	0	0	0	0	0	0	0	0	0	0	0.000902335	0	0	0	0	0
387	UniRef100_UPI0000D9D9E3		PREDICTED: similar to eukaryotic translation elongation factor 1 alpha 1 isoform 4	Macaca mulatta	0	0	0.00102353	0	0	0.00102986	0	0	0	0	0	0	0.000783195	0	0	0	0	0
388	UniRef100_Q6YLP7	1	Ribulose bisphosphate carboxylase large chain (Fragment)	Pogonatum pensilvanicum	0	0	0	0	0	0	0	0	0	0	0	0	0	0	0	0.00130836	0	0
389	UniRef100_C0NYC6	4	Hsp70-like protein	Ajellomyces capsulatus G186AR	0	0	0	0	0	0	0	0	0	0	0	0	0	0	0.0005501	0	0.000717825	0.000518287
390	UniRef100_A1CXP1	3	5-methyltetrahydropteroyltriglutamate--homocysteine S-methyltransferase	Neosartorya fischeri NRRL 181	0	0	0	0.000564685	0	0	0	0	0.000454512	0	0	0	0	0	0	0	0	0
391	UniRef100_Q5UF97	1	Ribulose bisphosphate carboxylase large chain (Fragment)	Cremastosperma bullatum	0	0	0	0.000960585	0	0	0	0	0	0	0	0	0	0	0	0	0	0
392	UniRef100_A5CRH9	2	Glutamine synthetase I	Clavibacter michiganensis subsp. michiganensis NCPPB 382	0	0	0	0	0	0	0	0	0	0	0	0	0.00152673	0.000936112	0	0	0	0
393	UniRef100_A9PFJ5	6	Putative uncharacterized protein	Populus trichocarpa	0	0.00113891	0	0.000979969	0	0	0	0	0	0.000929497	0	0.000998908	0.000811292	0.000994881	0.000869552	0.000774453	0	0.000819266
394	UniRef100_O50002	1	Cysteine protease	Prunus armeniaca	0.00140457	0.00141887	0	0.00122086	0.0015216	0	0.00117429	0	0	0	0	0	0	0.00123943	0	0.000964822	0.00141359	0.00102065
395	UniRef100_A9PF62	5	Putative uncharacterized protein	Populus trichocarpa	0	0	0	0	0	0.000750466	0	0	0.000554878	0	0	0	0	0	0.000611704	0	0	0.00230532
396	UniRef100_C6TH54	1	Putative uncharacterized protein	Glycine max	0.00162205	0.00163857	0	0.00140989	0	0	0.00135611	0.00178862	0.00226963	0	0	0	0	0	0	0	0	0
397	UniRef100_A6WXW9	3	ATP synthase subunit alpha	Ochrobactrum anthropi ATCC 49188	0.000987888	0	0	0.000858676	0	0.000934765	0	0	0.000691144	0	0	0.000875271	0	0	0.000761926	0.000678598	0	0.000717864
398	UniRef100_C6SY14	1	Putative uncharacterized protein	Glycine max	0.00497856	0	0	0	0.00539338	0	0	0	0	0	0	0	0.00358254	0.00439324	0.00383981	0.00341986	0.00501056	0.00361775
399	UniRef100_C7PRE9	1	OmpA/MotB domain protein	Chitinophaga pinensis DSM 2588	0	0	0	0	0	0	0	0	0	0	0	0	0.000703961	0	0	0.000671997	0	0.00142176
400	UniRef100_Q9FXV2	2	Legumin (Fragment)	Quercus acutissima	0	0	0.00390801	0.00361212	0	0.00393219	0	0	0.00290738	0	0	0	0	0	0	0	0	0
401	UniRef100_A8IEU1	1	Putative outer membrane protein, putative porin	Azorhizobium caulinodans ORS 571	0	0	0	0	0	0	0	0	0	0	0	0.000943883	0	0	0.00164331	0.000731793	0	0.000774137
402	UniRef100_C6SZM2	1	Photosystem II reaction center psb28 protein	Glycine max	0	0.00283774	0	0.00244171	0.00304319	0	0.00234857	0	0	0	0	0	0	0	0	0	0	0
403	UniRef100_C7YSV9	2	Predicted protein	Nectria haematococca mpVI 77-13-4	0.000943405	0.000953012	0	0	0	0	0	0.00208057	0	0	0	0	0	0.00083249	0	0	0.000949468	0
404	UniRef100_C3BXX4	1	Putative uncharacterized protein	Bacillus thuringiensis serovar tochigiensis BGSC 4Y1	0.00154718	0.00156294	0.00145498	0.00134482	0.0016761	0.00146399	0	0	0	0	0	0	0	0	0	0	0	0
405	UniRef100_A1D6N2	9	Oxidoreductase, zinc-binding	Neosartorya fischeri NRRL 181	0	0	0	0	0	0	0	0	0	0	0	0	0	0	0.00098682	0.000878896	0	0.000929752
406	UniRef100_A1CBQ2	5	Agmatinase, putative	Aspergillus clavatus	0	0	0	0	0	0.00115484	0	0	0	0	0	0	0	0	0	0	0	0
407	UniRef100_C9S6Q9	1	Outer mitochondrial membrane protein porin	Verticillium albo-atrum VaMs.102	0	0	0	0.0017695	0	0	0.001702	0	0	0	0	0	0.00146492	0.00179643	0	0.00139841	0	0
408	UniRef100_A4RKY3	9	Putative uncharacterized protein	Magnaporthe grisea	0	0	0	0.000960585	0	0	0	0	0.00077317	0	0	0	0	0	0	0	0	0
409	2001280060	1	Uncharacterized conserved protein [Soil: Diversa Silage]		0	0	0	0	0	0	0	0	0	0.00394815	0	0	0	0	0	0	0	0
410	UniRef100_B8X9S7	1	Endochitinase (Fragment)	Hypocrea alutacea	0	0	0	0	0	0	0	0	0	0	0	0	0.00132057	0	0	0.00252121	0	0
411	UniRef100_Q5XQ46	1	Family 10 xylanase	Cryptovalsa sp. BCC 7197	0	0	0	0	0	0	0	0	0	0	0.00185039	0	0.00222668	0	0.00238659	0.00106279	0.00155713	0
412	UniRef100_B9GGE2	1	Predicted protein (Fragment)	Populus trichocarpa	0.00147028	0	0	0.00127797	0.00159278	0.00139121	0.00122922	0.00162126	0.00102863	0	0	0	0	0	0	0	0	0
413	UniRef100_D1IEY2	1	Whole genome shotgun sequence of line PN40024, scaffold_26.assembly12x (Fragment)	Vitis vinifera	0	0	0	0	0	0	0	0	0	0	0	0	0.00192466	0.0023602	0	0.00183727	0	0
414	UniRef100_B9H3X7	1	Predicted protein (Fragment)	Populus trichocarpa	0	0	0.00108706	0.00100475	0	0	0.000966424	0	0	0.000953001	0	0	0.000831807	0	0	0	0	0
415	UniRef100_P06805	3	Elongation factor 1-alpha	Mucor racemosus	0	0	0	0	0	0.00103885	0	0	0.00153621	0	0	0	0	0	0	0	0	0
416	UniRef100_C0SAL3	4	Putative uncharacterized protein	Paracoccidioides brasiliensis Pb03	0	0	0.000428324	0	0	0.000430974	0	0	0.000318653	0	0	0	0	0	0.000351287	0	0	0.000661943
417	UniRef100_A5C314	4	Putative uncharacterized protein	Vitis vinifera	0	0	0	0	0	0	0	0	0	0.00114518	0	0	0.000999547	0	0	0	0.00139797	0.00100937
418	UniRef100_O81355	1	Isoflavone reductase related protein	Pyrus communis	0	0	0	0	0	0	0	0	0	0	0	0	0.00117479	0	0	0.00112145	0.00328615	0.00237268
419	UniRef100_A9PF34	10	Aminomethyltransferase	Populus trichocarpa	0	0	0	0.00107124	0	0	0	0	0	0.00101607	0	0	0	0	0	0.000846584	0	0
420	UniRef100_A2Q3A6	53	Plasma-membrane proton-efflux P-type ATPase	Medicago truncatula	0	0.000500942	0	0	0	0	0.00041459	0.000546816	0	0	0	0	0	0	0	0	0	0
421	UniRef100_B0U2E9	4	Outer membrane protein P6	Xylella fastidiosa	0	0	0	0	0	0	0	0	0	0.00221687	0	0	0	0	0	0.00184709	0.00270624	0
422	UniRef100_A2I7W3	1	Pectate lyase (Fragment)	Penicillium citrinum	0	0	0	0	0	0	0	0	0	0	0	0.00153625	0	0	0	0	0	0
423	UniRef100_B0CQ43	1	Elongation factor 1-alpha	Laccaria bicolor S238N-H82	0	0	0	0	0	0	0	0	0	0	0	0	0	0.00385841	0	0	0	0
424	UniRef100_B6HRM9	1	Pc22g24890 protein	Penicillium chrysogenum Wisconsin 54-1255	0	0	0.00145947	0	0	0	0	0	0.00108578	0	0	0.00275008	0	0	0.00239395	0	0	0.00225551
425	UniRef100_A3LQD6	1	Enolase	Pichia stipitis	0	0	0.00107715	0	0	0.00325145	0	0	0.00240405	0	0	0	0	0	0.000883418	0	0	0
426	UniRef100_A4ALR8	1	Glutamine synthetase	marine actinobacterium PHSC20C1	0	0.00106267	0	0	0	0.000995388	0	0.00115998	0	0.000867271	0	0	0.000756979	0	0.00081134	0.000722607	0.00105872	0
427	UniRef100_C7PK45	1	Histone family protein DNA-binding protein	Chitinophaga pinensis DSM 2588	0	0	0	0	0.00612057	0	0.00472354	0.00623001	0.00395273	0	0	0	0.00406558	0.00498559	0.00435753	0.00388097	0	0
428	UniRef100_A1C7Y5	23	Cyanate hydratase, putative	Aspergillus clavatus	0.00306607	0.00309729	0.00288335	0.00266504	0	0.00290119	0.00256338	0	0.00214508	0	0	0	0	0.00270559	0	0	0	0
429	UniRef100_B9RNW8	2	NADP-dependent glyceraldehyde-3-phosphate dehydrogenase, putative	Ricinus communis	0	0	0	0	0	0	0	0	0	0.000834116	0	0	0.000728041	0.000892791	0	0.000694982	0	0.000735196
430	UniRef100_C7DUZ4	10	Subtilisin-like serine protease PR1H (Fragment)	Metarhizium majus	0	0.000953012	0	0	0.00102201	0.000892674	0.000788733	0.00208057	0	0	0	0	0	0	0	0.000648042	0	0
431	UniRef100_A1C6F9	10	Secretory pathway gdp dissociation inhibitor	Aspergillus clavatus	0.00107443	0	0	0	0	0.00101666	0	0	0.00300677	0	0	0.00095195	0.000773154	0	0	0	0	0
432	UniRef100_Q5DT20	2	Hornerin	Homo sapiens	0	0	0	0	0	0	0	0	0	0	0.000211009	0	0.00012696	0.00015569	0.000136077	0.00024239	0	0.000128208
433	UniRef100_UPI00001D0817	1	PREDICTED: similar to Bromodomain adjacent to zinc finger domain protein 1B (Williams-Beuren syndrome chromosome region 9 protein homolog) (WBRS9)	Rattus norvegicus	0	0	0	0	0	0	0	0	0	0	0.000407437	0	0	0	0	0	0	0
434	UniRef100_Q58YD9	1	Gamma-actin	Blakeslea trispora	0	0	0	0	0	0	0	0	0	0	0	0	0.00192979	0.00354974	0	0.000921083	0.00134951	0
435	UniRef100_C6W5G4	1	Diaminopimelate decarboxylase	Dyadobacter fermentans DSM 18053	0	0	0	0	0	0	0	0	0	0	0	0	0	0	0.000948216	0	0	0
436	UniRef100_A6SAE6	2	Elongation factor 1-alpha	Botryotinia fuckeliana B05.10	0	0.00110425	0	0	0	0.00206868	0	0	0.00152953	0	0	0	0	0	0	0	0	0
437	UniRef100_B9HAQ4	1	Predicted protein	Populus trichocarpa	0.00135901	0	0.00127803	0	0	0	0.0011362	0	0	0	0	0	0	0	0	0	0	0
438	UniRef100_C7YYH5	1	Adenosylhomocysteinase	Nectria haematococca mpVI 77-13-4	0	0	0.00105316	0	0	0	0	0	0	0	0	0	0	0	0	0	0	0.000813792
439	UniRef100_P34825	1	Elongation factor 1-alpha	Hypocrea jecorina	0.00109312	0	0	0	0	0.00103434	0	0.00120537	0.000764766	0	0	0	0	0	0	0	0	0
440	UniRef100_A5AL61	3	Putative uncharacterized protein	Vitis vinifera	0	0	0	0	0	0	0	0	0	0	0	0	0	0	0	0	0	0.000677908
441	UniRef100_A3GGD9	4	Malate dehydrogenase	Pichia stipitis	0	0	0	0.00131646	0	0.00286624	0	0	0	0	0	0	0	0.0013365	0	0	0	0
442	UniRef100_Q8H1T3	1	Ferritin-2, chloroplastic	Nicotiana tabacum	0	0	0	0	0	0	0	0	0	0	0	0.00172013	0	0	0.00149738	0	0	0
443	UniRef100_B2WMR5	4	Leucine aminopeptidase 2	Pyrenophora tritici-repentis Pt-1C-BFP	0	0	0.00117047	0	0	0.00117771	0	0	0.000870774	0	0	0.00110275	0.000895634	0	0	0	0	0.00180887
444	UniRef100_B3TLV1	1	Thioredoxin peroxidase	Elaeis guineensis	0	0	0	0.00151759	0	0	0	0	0	0.00143943	0.00208811	0	0.00125638	0.00308137	0	0.00119933	0	0
445	UniRef100_C9SBG2	1	Woronin body major protein	Verticillium albo-atrum VaMs.102	0	0	0	0	0	0.00363203	0.00320912	0	0.00268544	0	0	0	0.00276211	0	0.00296046	0	0	0.00278926
446	UniRef100_C5TFQ8	3	OmpA/MotB domain protein	Zymomonas mobilis subsp. mobilis ATCC 10988	0	0	0	0	0	0	0	0	0	0.00113267	0.00328621	0.00121725	0.000988623	0	0	0	0	0
447	UniRef100_B2AVK3	2	Predicted CDS Pa_7_2650	Podospora anserina	0	0	0	0	0	0	0	0	0	0.000500067	0	0	0.000436473	0	0.000467817	0.000416654	0	0.000881526
448	UniRef100_Q9SU63	1	Aldehyde dehydrogenase family 2 member B4, mitochondrial	Arabidopsis thaliana	0.000934638	0	0	0.000812391	0	0	0.00156281	0	0	0	0	0	0.000672558	0	0	0	0	0
449	UniRef100_B9RY20	1	Zinc metalloprotease, putative	Ricinus communis	0	0	0	0	0	0	0	0	0	0.000535602	0	0	0.000467489	0	0	0.00133878	0	0.000472084
450	UniRef100_A1CYB8	1	Pectate lyase, putative	Neosartorya fischeri NRRL 181	0	0	0.00147311	0	0	0	0	0	0	0	0	0.00277578	0	0	0.00241633	0	0	0.00113829
451	UniRef100_A5AMY6	3	Putative uncharacterized protein	Vitis vinifera	0	0	0	0	0	0	0	0	0	0	0.00071849	0	0.000432301	0.000530128	0	0.000412672	0	0.00043655
452	UniRef100_P15252	2	Rubber elongation factor protein	Hevea brasiliensis	0	0	0.000755383	0	0	0	0	0	0	0	0	0	0	0	0	0	0	0
453	UniRef100_Q0U9U5	1	Putative uncharacterized protein	Phaeosphaeria nodorum	0	0	0.00433825	0	0	0.00218255	0	0	0.00322745	0	0	0.00204364	0	0	0	0	0	0
454	UniRef100_Q0UVU7	1	Putative uncharacterized protein	Phaeosphaeria nodorum	0	0	0	0	0	0	0	0	0.000734431	0	0	0.000930089	0	0	0.000809646	0	0	0.000762824
455	UniRef100_A7SZW8	1	Predicted protein	Nematostella vectensis	0	0	0	0	0	0.00141606	0	0	0	0	0	0	0	0	0	0	0	0
456	UniRef100_B2FQM8	1	Putative outer membrane protein	Stenotrophomonas maltophilia K279a	0	0	0	0	0	0.00129999	0	0.00151495	0.000961182	0	0.0016431	0	0.000988623	0	0.00105962	0	0	0
457	UniRef100_Q9GT29	1	Malate dehydrogenase	Phytomonas sp. isolate Ech1	0	0	0.00293708	0	0	0.00147763	0	0	0.00109252	0	0	0	0	0	0	0	0	0
458	UniRef100_A1USC1	25	Elongation factor Tu 1	Bartonella bacilliformis KC583	0	0	0	0	0.00126095	0	0	0	0	0	0	0	0.000837584	0.00102712	0.000897732	0.000799551	0	0
459	UniRef100_Q20BN1	1	Cytochrome b6-f complex iron-sulfur subunit	Panax ginseng	0	0	0	0	0	0	0	0	0	0	0	0	0	0	0	0.00187721	0	0
460	UniRef100_A6R2Y5	19	Elongation factor 3	Ajellomyces capsulatus NAm1	0	0	0	0.000405818	0	0.000441779	0	0	0.000326641	0	0	0	0	0	0	0	0	0
461	UniRef100_B2AT16	6	Predicted CDS Pa_1_14360	Podospora anserina	0	0	0	0.0020714	0.00258166	0	0	0	0.00166726	0	0	0	0	0	0	0	0	0
462	UniRef100_O22462	5	Barperm1 (Fragment)	Hordeum vulgare	0	0	0	0	0	0	0	0	0	0	0	0.0018798	0	0	0.00163637	0	0	0
463	UniRef100_Q121L2	1	tRNA modification GTPase mnmE	Polaromonas sp. JS666	0	0	0	0	0	0	0	0	0.000735968	0	0	0	0	0	0	0	0	0
464	UniRef100_A5BKL4	11	Putative uncharacterized protein	Vitis vinifera	0	0	0	0	0	0	0	0	0	0	0	0.00121063	0	0	0	0	0	0
465	UniRef100_A8PUT8	1	Putative uncharacterized protein	Brugia malayi	0	0	0.000430664	0	0	0	0	0	0	0	0	0	0	0	0	0	0	0
466	UniRef100_A8WKW7	1	Putative uncharacterized protein	root	0	0	0	0	0	0	0	0	0	0	0	0	0	0.00132453	0	0	0	0
467	UniRef100_A8NLP8	1	Putative uncharacterized protein	Coprinopsis cinerea okayama7#130	0	0	0	0	0	0	0	0	0	0.00116776	0	0.00125497	0	0	0	0.00194595	0	0.00308783
468	UniRef100_A9PL02	3	Mitochondrial glycine decarboxylase complex P-protein	Populus tremuloides	0	0	0	0	0	0	0	0	0	0.00078218	0	0	0	0	0	0.000325855	0.000477421	0
469	UniRef100_UPI0000DA2F64		PREDICTED: similar to thrombospondin repeat containing 1	Rattus norvegicus	0	0	0	0	0	0	0	0	0	0.000356454	0	0	0	0	0	0	0	0
470	UniRef100_C6T8W8	1	Putative uncharacterized protein	Glycine max	0	0	0	0	0	0	0	0	0	0	0	0	0	0	0	0.00391026	0	0.00137884
471	UniRef100_O82660	1	Photosystem II stability/assembly factor HCF136, chloroplastic	Arabidopsis thaliana	0	0	0	0	0	0	0	0	0	0.00102867	0	0	0	0	0	0	0	0
472	UniRef100_C6EVF9	3	Elongation factor 1-alpha	Glycine max	0	0	0	0	0	0	0	0	0	0	0	0	0.000805871	0.000988234	0	0	0	0
473	UniRef100_B5LRC4	5	Superoxide dismutase [Cu-Zn] (Fragment)	Vicia faba	0	0	0	0	0	0	0.00204075	0.00269161	0	0	0	0	0	0	0	0	0	0
474	UniRef100_C6TAV0	4	Putative uncharacterized protein	Glycine max	0	0	0	0	0	0	0	0	0	0	0	0	0	0	0	0	0	0.00171546
475	UniRef100_A1CNN8	11	40S ribosomal protein S22	Trichocomaceae	0	0	0	0.00336205	0	0	0	0	0	0	0	0	0	0	0	0	0	0
476	UniRef100_Q0UJY8	1	Putative uncharacterized protein	Phaeosphaeria nodorum	0	0	0.000934525	0	0	0.000940307	0	0	0	0	0	0	0	0	0.00229933	0	0	0.00072212
477	UniRef100_C7Z218	1	Putative uncharacterized protein	Nectria haematococca mpVI 77-13-4	0	0.00334181	0.00311098	0	0	0.00313023	0	0	0.00231442	0.00272734	0	0	0	0	0	0	0	0.0024039
478	UniRef100_Q1QMA7	2	Type I secretion outer membrane protein, TolC	Nitrobacter hamburgensis X14	0	0	0	0	0	0.000976993	0	0	0	0	0	0	0.00074299	0.000911123	0	0	0.00103915	0.000750293
479	UniRef100_Q9FF05	1	Osmotin-like protein (Fragment)	Fagus sylvatica	0	0	0	0	0	0	0	0	0	0	0	0.0035641	0.00289469	0	0.00310256	0.00276325	0	0.00292314
480	UniRef100_B9SJY9	1	Fructose-bisphosphate aldolase	Ricinus communis	0	0	0	0	0	0	0.00106699	0	0	0.00105217	0	0	0.000918366	0.00112619	0	0.000876665	0.00128443	0
481	UniRef100_C7ZD60	1	Predicted protein	Nectria haematococca mpVI 77-13-4	0.00222493	0.00224759	0.00209234	0	0	0	0	0	0.0015566	0	0	0	0	0	0	0	0.00223923	0.00161678
482	UniRef100_B2LML8	5	ATP-dependent Clp protease proteolytic subunit	Guizotia abyssinica	0	0	0	0	0	0	0.00214487	0	0	0.00211508	0.00306825	0	0	0.00226386	0	0.00176228	0.00258197	0
483	UniRef100_Q9M1B9	1	Probable fructokinase-4	Arabidopsis thaliana	0	0.00155815	0	0.00268139	0	0	0.00128955	0.00170083	0.00107912	0	0	0	0	0	0	0	0	0
484	UniRef100_B4S112	5	60 kDa chaperonin	Alteromonas macleodii 'Deep ecotype'	0	0	0	0.00158933	0	0	0.000764354	0	0.000639623	0	0	0	0	0	0	0	0	0
485	UniRef100_A5AY42	2	Putative uncharacterized protein	Vitis vinifera	0.00299307	0	0.0028147	0	0	0.00283212	0.00250235	0	0.002094	0	0	0	0	0	0	0	0	0
486	UniRef100_A2WPC2	19	Putative uncharacterized protein	Oryza sativa Indica Group	0	0	0	0.000855315	0	0	0	0	0	0.00162253	0	0	0	0	0	0	0	0.000715054
487	UniRef100_B6U4F7	2	Acylamino-acid-releasing enzyme	Zea mays	0	0	0	0	0	0	0	0	0	0	0	0	0.000466885	0.000572538	0	0.000891371	0	0
488	2001351427	10	Glucose dehydrogenase [Soil: Diversa Silage]		0	0	0	0	0	0	0	0	0	0	0	0	0.000595125	0.000729798	0	0.000568102	0	0.000600975
489	UniRef100_Q6C2B5	1	Nucleoside diphosphate kinase	Yarrowia lipolytica	0	0	0	0.00862631	0	0	0.00276575	0	0	0	0	0	0	0	0	0	0	0
490	UniRef100_A3LPD9	8	Heat shock protein 90 homolog	Pichia stipitis	0	0.00071242	0	0	0	0	0	0	0	0	0	0	0	0	0	0	0	0
491	UniRef100_B3PKS5	1	Cip2	Cellvibrio japonicus Ueda107	0	0	0	0	0	0	0	0	0	0.000869089	0	0	0.000758566	0	0.000813041	0	0.00106094	0
492	UniRef100_Q9NAX9	1	Heat shock 70 protein	Parastrongyloides trichosuri	0	0	0	0	0	0	0	0	0	0.00064372	0	0	0	0.000689002	0	0	0	0
493	UniRef100_Q67BD2	2	Heat shock protein 70-1	Nicotiana tabacum	0	0	0	0	0	0	0	0	0	0	0.000920944	0	0	0.00135901	0	0	0.000774987	0
494	UniRef100_B6JIX0	3	60 kDa chaperonin	Oligotropha carboxidovorans OM5	0	0	0	0	0	0.000866658	0.000765746	0	0	0	0	0	0.000659082	0	0	0	0.000921797	0
495	UniRef100_C7PFX3	1	TonB-dependent receptor plug	Chitinophaga pinensis DSM 2588	0	0	0	0	0	0	0	0	0	0	0	0.000415978	0	0	0.000724221	0	0	0.000682339
496	UniRef100_B0DAU2	4	Histone H2B	Laccaria bicolor S238N-H82	0	0	0	0	0	0	0	0	0	0	0	0.00574855	0	0.00286269	0.00250207	0	0	0
497	UniRef100_B9GT56	2	Predicted protein	Populus trichocarpa	0	0.00466014	0	0.00200489	0.00249877	0	0.00192842	0.00254345	0	0	0	0	0	0	0	0	0	0
498	UniRef100_Q7RWP2	1	Beta-glucosidase 1	Neurospora crassa	0	0	0	0.000499504	0	0	0	0	0	0	0	0	0	0	0	0	0	0
499	UniRef100_Q3SA38	1	Putative glyceraldehyde 3-phosphate dehydrogenase (Fragment)	Fagus sylvatica	0.00402268	0	0	0	0	0	0	0	0	0	0	0	0	0	0	0.00276325	0	0
500	UniRef100_B7FMC9	6	Proteasome subunit alpha type	Medicago truncatula	0	0	0	0	0	0	0	0	0	0	0	0	0	0	0	0.00140409	0	0
501	UniRef100_A9H699	2	General secretion pathway protein D	Gluconacetobacter diazotrophicus PAl 5	0	0	0	0	0	0	0	0	0	0	0	0	0	0	0	0.000447417	0	0.000473307
502	UniRef100_C6T9U4	2	Putative uncharacterized protein	Glycine max	0	0.00174555	0	0	0	0	0	0	0	0	0.00206659	0.00153097	0	0	0	0	0	0
503	UniRef100_Q8VXN6	1	Glyceraldehyde-3-phosphate dehydrogenase (Fragment)	Coleochaete scutata	0	0.00160238	0	0.00137876	0	0	0.00132617	0	0	0	0	0	0	0	0	0	0	0
504	UniRef100_B0RR14	6	TonB-dependent outer membrane receptor	Xanthomonas campestris pv. campestris str. B100	0	0	0	0	0	0	0	0	0	0.000390354	0	0	0	0	0	0.000325241	0	0
505	UniRef100_B4LKF1	1	GJ21609	Drosophila virilis	0	0.000544432	0	0	0	0	0	0	0	0	0	0	0	0	0	0	0	0
506	UniRef100_Q2HPG3	1	Osmotin-like protein I	Gossypium hirsutum	0	0	0	0	0	0	0	0	0	0.00171304	0	0.00184096	0.00149519	0	0	0	0	0
507	UniRef100_A6RTG6	2	Putative uncharacterized protein	Botryotinia fuckeliana B05.10	0	0	0	0	0	0	0	0	0	0	0	0	0.000790035	0	0	0	0	0
508	UniRef100_B7FKU7	1	Cysteine synthase	Medicago truncatula	0.00154718	0	0	0.00134482	0	0	0	0	0	0	0	0	0	0	0	0	0.00155713	0
509	UniRef100_B8IP19	1	Septum site-determining protein MinC	Methylobacterium nodulans ORS 2060	0	0	0	0	0	0	0	0	0	0	0	0	0.00136542	0	0	0	0	0
510	UniRef100_A6S819	11	Citrate synthase	Botryotinia fuckeliana B05.10	0	0	0	0	0	0.000891003	0.000787256	0	0.000658788	0	0	0	0	0	0	0	0	0
511	UniRef100_C7YIL7	1	Putative uncharacterized protein	Nectria haematococca mpVI 77-13-4	0	0	0	0	0	0	0	0	0	0	0.00173808	0	0.00104577	0	0.00112087	0.000998284	0	0
512	UniRef100_P17614	1	ATP synthase subunit beta, mitochondrial	Nicotiana plumbaginifolia	0	0	0	0	0	0	0.000750705	0	0	0	0	0	0	0.000792352	0	0	0	0
513	UniRef100_P83372	1	Citrate synthase, mitochondrial	Fragaria x ananassa	0	0	0	0	0	0	0	0	0	0.000883914	0	0.000949921	0	0	0	0	0	0
514	UniRef100_UPI00017961F5		PREDICTED: similar to guanylate binding protein 4	Equus caballus	0	0	0	0	0	0	0	0	0	0	0	0	0	0	0	0	0	0.000513192
515	UniRef100_Q0PPW7	1	Elongation factor 1-alpha (Fragment)	Mycoblastus sanguinarius	0	0	0	0	0	0.00118063	0	0	0.000872934	0	0	0	0	0	0	0	0	0
516	UniRef100_A6RKE1	1	Putative uncharacterized protein	Botryotinia fuckeliana B05.10	0	0	0	0	0	0	0	0	0	0	0	0	0	0	0	0.00104987	0	0.00111062
517	UniRef100_A1D3N7	2	Molecular chaperone Hsp70	Neosartorya fischeri NRRL 181	0	0	0	0	0	0	0	0	0	0	0.000942596	0	0	0	0	0	0.000793207	0
518	UniRef100_A5B109	24	Putative uncharacterized protein	Vitis vinifera	0	0	0	0	0	0	0	0	0	0.00113267	0	0	0	0	0	0	0	0
519	UniRef100_C7Z7S4	3	Predicted protein	Nectria haematococca mpVI 77-13-4	0	0	0	0	0	0	0	0	0.00173297	0	0	0	0	0	0	0	0	0
520	UniRef100_A8B3L3	1	O-acetylhomoserine sulfhydrylase (Fragment)	Epichloe festucae	0	0	0	0	0	0	0	0	0	0	0	0	0.000911426	0	0	0.000870041	0	0.000920385
521	UniRef100_A6SEW8	4	Putative uncharacterized protein	Botryotinia fuckeliana B05.10	0	0	0	0	0	0	0	0	0	0	0	0	0	0	0	0	0.00131788	0
522	UniRef100_B2ADM5	1	Predicted CDS Pa_4_1490	Podospora anserina	0	0	0	0	0	0	0	0	0	0	0	0.0018486	0	0	0	0	0	0
523	UniRef100_A6SBH0	2	Putative uncharacterized protein	Botryotinia fuckeliana B05.10	0	0	0	0.000490534	0	0	0	0.000622302	0	0	0	0	0	0	0	0	0	0
524	UniRef100_C9SA50	1	Putative uncharacterized protein	Verticillium albo-atrum VaMs.102	0	0	0	0	0	0	0	0	0	0	0	0.00325192	0	0	0.0014154	0	0	0.0026671
525	UniRef100_B2ARD9	2	Predicted CDS Pa_4_7820	Podospora anserina	0	0	0.00109334	0	0	0.00110011	0	0	0.000406697	0	0	0	0	0	0	0	0	0
526	UniRef100_A3HTJ7	3	Xylose isomerase	Algoriphagus sp. PR1	0	0	0	0	0	0	0	0	0	0.000933684	0	0	0.000814946	0	0.000873469	0.000777942	0	0.000822956
527	UniRef100_Q9X4R9	1	OprF	Pseudomonas cichorii	0	0	0	0	0	0	0	0.00160252	0.00101674	0.00119814	0.00173808	0	0	0	0	0.000998284	0	0
528	UniRef100_Q1P9U3	1	ATP synthase subunit 9, mitochondrial	Camellia sinensis	0	0	0.00556317	0	0	0.00559759	0.00494582	0.00652319	0.00413874	0	0	0	0	0	0	0	0	0
529	UniRef100_A4RGY5	10	Vacuolar ATP synthase catalytic subunit A	Magnaporthe grisea	0.000598613	0	0	0.000520317	0	0	0	0	0.000418801	0	0.000715924	0	0	0	0	0	0	0
530	UniRef100_A9PFJ3	4	Predicted protein	Populus trichocarpa	0	0	0	0	0	0	0	0	0	0	0.0022191	0	0	0.00327467	0.00143107	0.00127456	0	0
531	UniRef100_B6TI56	2	Putative uncharacterized protein	Zea mays	0	0	0	0	0	0	0	0	0	0.00147529	0	0	0.00128767	0.00157906	0	0.0012292	0.00180095	0
532	UniRef100_Q2EKD7	1	Polyprotein	Papaya ringspot virus	0	0	0	0	0	0	0	0	0	0	0	0	0.00010814	0	0.000115906	0	0	0
533	UniRef100_Q7X9C3	1	Aspartic protease (Fragment)	Pyrus pyrifolia	0	0	0	0	0	0	0	0	0	0	0.00302199	0	0.00363654	0	0	0	0	0
534	UniRef100_A6S494	2	Malate dehydrogenase	Botryotinia fuckeliana B05.10	0	0	0.00416014	0	0	0.00139529	0	0	0	0	0	0	0	0	0	0	0	0
535	UniRef100_B2VZE9	3	Enolase	Pyrenophora tritici-repentis Pt-1C-BFP	0	0	0.00107715	0.000995595	0	0	0.000957619	0	0.00080135	0	0	0	0	0	0	0	0	0
536	UniRef100_B0T2C8	3	30S ribosomal protein S3	Caulobacter sp. K31	0	0	0	0	0	0	0	0	0	0	0	0	0.00144734	0	0	0.00138162	0.00202427	0
537	UniRef100_A1CTV7	27	ATP citrate lyase subunit (Acl), putatibe	Aspergillus clavatus	0	0	0	0.000893796	0.00111397	0.000972997	0	0	0.000719412	0	0	0	0	0	0	0	0	0
538	2001242536	1	ABC-type multidrug transport system, ATPase and permease components [Soil: Diversa Silage]		0	0	0	0	0.00159745	0	0	0	0	0	0	0	0	0	0	0	0	0
539	UniRef100_Q5LQF2	1	Acyl-CoA dehydrogenase famiy protein	Ruegeria pomeroyi	0	0	0.00114496	0	0	0.00115205	0	0	0	0	0	0	0	0	0	0	0	0.000884728
540	UniRef100_B1VLB7	9	Putative TerD-family protein	Streptomyces griseus subsp. griseus NBRC 13350	0	0	0	0	0	0	0	0	0	0.00186737	0	0	0.00162989	0	0.00174694	0	0	0.00164591
541	UniRef100_Q7XBP8	1	Ubiquitin/actin fusion protein 2	Bigelowiella natans	0	0	0.00103022	0	0.00118678	0	0.000915892	0	0.000766433	0	0	0	0	0	0	0	0	0
542	UniRef100_UPI0001AEE432		streptogrisin A precursor	Streptomyces albus J1074	0	0	0	0	0	0	0	0	0	0	0	0	0.00122242	0	0	0	0	0
543	UniRef100_D0KXQ9	1	Polypeptide-transport-associated domain protein ShlB-type	Halothiobacillus neapolitanus c2	0	0	0	0	0	0	0.000718623	0	0	0	0	0	0.000618523	0.000758491	0	0	0	0
544	UniRef100_Q0V7G4	1	Putative uncharacterized protein	Phaeosphaeria nodorum	0	0	0	0	0	0	0	0	0	0	0	0	0.00161534	0.00198088	0.00173134	0	0	0
545	UniRef100_A8NZY9	1	Putative uncharacterized protein	Coprinopsis cinerea okayama7#130	0	0.00178858	0	0.00153897	0	0	0	0	0	0	0	0	0	0	0	0	0	0
546	UniRef100_A0N0G9	21	Beta-tubulin	Blastocladiella emersonii	0	0	0	0	0	0	0	0	0	0	0	0	0	0.00297132	0	0	0	0
547	UniRef100_A1WCN6	2	Elongation factor Tu 2	Acidovorax sp. JS42	0	0	0	0	0.00137558	0	0.0010616	0.00140018	0	0	0	0	0.000913728	0	0	0	0	0
548	UniRef100_C5CPL5	1	Porin Gram-negative type	Variovorax paradoxus S110	0	0	0	0	0	0	0	0	0	0	0	0	0	0	0	0	0	0.00191807
549	UniRef100_A1CT51	22	GDP-mannose pyrophosphorylase A	Aspergillus clavatus	0	0.00100585	0	0	0	0	0	0	0	0	0	0	0	0	0	0	0	0
550	UniRef100_Q095P1	1	Protein oar	Stigmatella aurantiaca DW4/3-1	0	0	0	0	0	0	0	0	0	0	0	0	0	0	0	0	0	0.00070744
551	UniRef100_A9P8M1	3	Triosephosphate isomerase	Populus trichocarpa	0	0	0	0	0	0	0.00328433	0.0021659	0	0.00161936	0	0	0	0	0	0	0	0
552	UniRef100_Q9XF73	1	Putative chlorophyll a/b-binding protein	Phalaenopsis hybrid cultivar	0	0	0	0	0	0.00343535	0	0	0.00127001	0	0	0	0	0	0	0	0	0
553	UniRef100_B9T4X3	3	14 kDa proline-rich protein DC2.15, putative	Ricinus communis	0	0	0	0	0	0	0.00300282	0	0	0	0	0	0	0	0	0	0	0
554	UniRef100_C5ES53	1	Putative uncharacterized protein	Clostridiales bacterium 1_7_47FAA	0	0	0	0	0	0	0	0	0	0	0	0	0	0	0	0	0	0.000670445
555	UniRef100_B9HG21	1	Shikimate kinase	Populus trichocarpa	0	0	0	0	0	0	0	0	0	0	0	0	0	0	0	0.0023497	0	0
556	UniRef100_C7SP30	1	ATP synthase subunit beta (Fragment)	Childia trianguliferum	0	0	0	0	0	0	0	0	0	0	0	0	0.00107052	0	0	0	0	0
557	UniRef100_D1H5G3	2	Whole genome shotgun sequence of line PN40024, scaffold_4.assembly12x (Fragment)	Vitis vinifera	0	0	0	0	0	0	0	0	0	0	0	0	0	0	0	0	0.000585725	0
558	UniRef100_B1PZ38	1	OmpF	Pseudomonas putida	0	0	0	0	0	0	0	0.00323307	0	0	0.00175328	0	0	0.00129364	0	0	0	0
559	UniRef100_B8NVH8	1	Pectate lyase, putative	Aspergillus	0	0	0	0	0	0	0	0	0	0	0	0.00235099	0	0	0	0	0	0
560	UniRef100_A6QX99	18	Cell division control protein 10	Ajellomyces capsulatus NAm1	0	0	0	0	0	0	0.00120803	0	0	0	0	0	0	0	0	0	0	0
561	UniRef100_A5C7J7	3	Putative uncharacterized protein	Vitis vinifera	0	0	0	0	0	0	0	0.00269161	0	0	0	0	0	0	0	0.00167673	0	0
562	UniRef100_B8NV82	1	60S ribosomal protein L27a, putative	Aspergillus	0	0	0	0	0	0	0	0	0	0	0	0.00299002	0	0	0	0	0	0
563	UniRef100_Q8WJJ9	1	Ribulose bisphosphate carboxylase large chain (Fragment)	Tacca artocarpifolia	0	0	0	0	0	0	0	0	0	0	0	0	0	0	0	0	0	0.000796062
564	UniRef100_B7UXI3	2	Putative membrane or periplasmic protein	Pseudomonas aeruginosa	0	0	0	0	0	0	0	0	0	0.00524754	0	0	0.0022901	0	0	0.00218612	0	0
565	UniRef100_Q0CZT3	1	Putative uncharacterized protein	Aspergillus terreus NIH2624	0	0	0	0.00132645	0	0	0	0	0	0	0	0.000676044	0	0	0	0	0	0
566	UniRef100_C7PSC4	1	Tail sheath protein	Chitinophaga pinensis DSM 2588	0	0	0	0	0	0	0	0	0	0	0	0	0	0	0.000834022	0	0	0.000785791
567	UniRef100_A1CCI2	20	Catalase	Aspergillus clavatus	0	0	0	0	0	0	0	0	0	0	0	0.000606966	0	0	0	0	0	0
568	UniRef100_Q6WE46	3	Actin	Amoeba proteus	0	0	0	0	0	0	0	0	0	0	0	0	0.00193495	0	0	0	0	0
569	UniRef100_A4RA79	6	Putative uncharacterized protein	Magnaporthe grisea	0	0	0	0	0	0	0	0	0	0	0	0.00259019	0	0	0.00112738	0	0	0.00106219
570	UniRef100_B2API8	3	Predicted CDS Pa_5_11620	Podospora anserina	0	0	0	0	0	0	0	0	0	0	0	0.000932035	0	0	0.00162268	0	0	0.00076442
571	UniRef100_B6VJT7	9	Cytochrome b	Vitis vinifera	0	0	0	0	0.00138257	0	0	0.00140729	0	0	0	0	0	0	0	0	0.00128443	0.000927393
572	UniRef100_C9S9J0	1	Superoxide dismutase	Verticillium albo-atrum VaMs.102	0	0	0	0	0	0	0	0	0	0	0	0.00289294	0.00234959	0	0	0.0022429	0.00328615	0
573	UniRef100_Q51781	2	Protein F (Fragment)	Pseudomonas fluorescens	0	0	0.00147311	0	0	0	0.00130964	0	0.00109593	0	0	0	0	0	0	0	0	0.00113829
574	UniRef100_B9S6M1	2	Serine carboxypeptidase, putative	Ricinus communis	0	0.000997948	0	0	0	0	0	0.00108933	0	0	0	0	0	0.000871743	0	0	0.000994236	0
575	UniRef100_C2FSR2	1	Elongation factor Tu	Sphingobacterium spiritivorum	0	0	0	0	0.00138257	0	0	0.00140729	0	0	0	0	0	0	0	0	0.00128443	0
576	UniRef100_P46256	1	Fructose-bisphosphate aldolase, cytoplasmic isozyme 1	Pisum sativum	0.0014085	0.00142284	0	0	0	0	0.00117758	0	0	0	0	0	0	0	0	0.000967524	0	0
577	UniRef100_B8LTH7	1	Choline dehydrogenase, putative	Talaromyces stipitatus ATCC 10500	0	0	0	0	0	0	0	0	0	0	0	0	0.000544115	0.000667244	0.000583189	0	0	0
578	UniRef100_Q11DD7	1	ATP synthase subunit alpha	Chelativorans sp. BNC1	0	0	0	0.000858676	0	0	0	0	0	0	0	0.000875271	0	0	0	0.000678598	0	0
579	UniRef100_UPI00016A54F0		porin, Gram-negative type	Burkholderia ubonensis Bu	0	0	0	0	0	0	0	0	0	0	0	0	0	0	0.0010179	0	0.00132826	0
580	UniRef100_A8NEG5	1	ATP synthase subunit beta	Coprinopsis cinerea okayama7#130	0	0	0	0	0	0	0	0	0	0	0	0	0	0.0024651	0	0	0	0
581	UniRef100_A6EF87	4	Putative uncharacterized protein	Pedobacter sp. BAL39	0	0	0	0	0	0	0	0	0	0	0.00171332	0	0	0	0	0	0.00144178	0
582	UniRef100_A4W8W9	3	OmpA domain protein transmembrane region-containing protein	Enterobacter sp. 638	0	0	0	0	0	0	0.00118421	0	0	0	0	0	0	0	0	0.000972975	0	0.00102928
583	UniRef100_Q9URR2	2	Allergen Pen n 13	Penicillium chrysogenum	0	0	0	0	0	0	0.00105893	0	0	0	0	0	0	0	0.000976877	0	0	0.000920385
584	UniRef100_B6GVW4	1	Pc06g00180 protein	Penicillium chrysogenum Wisconsin 54-1255	0	0	0	0	0	0.000961203	0	0	0.00142138	0	0	0	0	0	0	0	0	0
585	UniRef100_A5B8Y6	6	Putative uncharacterized protein	Vitis vinifera	0	0	0	0	0	0	0	0	0	0	0	0	0.000627099	0	0	0	0	0.000633263
586	UniRef100_A4AFD1	2	50S ribosomal protein L5	marine actinobacterium PHSC20C1	0	0	0	0.00222993	0.00277924	0	0	0.00282894	0	0	0	0	0	0	0	0	0	0
587	UniRef100_A8D311	1	Metalloendopeptidase	Trichoderma hamatum	0	0	0.00136274	0	0	0.00137117	0	0	0.00101381	0	0	0	0	0	0	0	0	0
588	UniRef100_D0T5G4	1	Predicted protein	Acinetobacter radioresistens	0	0	0	0	0	0	0.00331019	0	0	0	0	0	0	0	0	0	0	0
589	UniRef100_A9IUF9	3	Outer membrane porin protein	Bordetella petrii DSM 12804	0	0	0	0	0	0	0	0	0	0	0	0.00120735	0.000980586	0	0	0	0	0
590	UniRef100_A5C536	8	Putative uncharacterized protein	Vitis vinifera	0	0	0	0	0	0	0.000767143	0	0	0	0	0.00162596	0	0	0	0	0	0
591	UniRef100_A7BDD8	20	Putative uncharacterized protein	Actinomyces odontolyticus ATCC 17982	0	0	0	0.00126686	0	0	0	0	0	0	0	0	0	0	0	0	0	0
592	UniRef100_A8NYS1	6	DNA damage checkpoint protein rad24	Coprinopsis cinerea okayama7#130	0	0	0	0	0	0	0	0	0	0	0	0	0	0.0051002	0	0	0	0
593	UniRef100_B0XT32	2	Pectate lyase A	Aspergillus fumigatus A1163	0	0	0	0	0	0	0	0	0	0	0	0.00138789	0	0	0	0	0	0
594	UniRef100_A1CRA3	3	40S ribosomal protein S3, putative	Aspergillus clavatus	0	0	0	0	0	0	0.00314902	0	0.00131758	0	0	0	0	0	0	0	0	0
595	UniRef100_C9SW44	1	Pectate lyase C	Verticillium albo-atrum VaMs.102	0	0	0	0	0	0	0	0	0	0	0	0.00192031	0	0	0.00167164	0	0	0.00157497
596	UniRef100_Q7UH35	1	Predicted cation efflux system (AcrB/AcrD/AcrF family)	Rhodopirellula baltica	0	0	0	0	0	0	0	0	0	0	0	0	0	0	0.000358761	0	0	0
597	UniRef100_P12693	1	Aldehyde dehydrogenase	Pseudomonas aeruginosa group	0	0	0	0	0	0	0	0	0	0	0	0	0	0	0	0	0	0.000756507
598	UniRef100_D0WLG9	1	Putative extracellular nuclease	Actinomyces sp. oral taxon 848 str. F0332	0	0	0	0	0	0	0	0	0.000392188	0	0	0	0	0	0	0	0	0
599	UniRef100_C1XX29	4	Ribulose-1,5-bisphosphate carboxylase/oxygenase large subunit	Meiothermus silvanus DSM 9946	0	0	0	0	0	0	0	0	0	0	0	0	0.000753825	0	0	0.000719596	0	0
600	UniRef100_A3KCF4	34	Glucose-1-phosphate adenylyltransferase	Ipomoea batatas	0	0	0	0	0.00102974	0	0	0	0	0	0	0	0	0	0	0.000652942	0	0
601	UniRef100_A4YK56	7	Putative Glucose/sorbosone dehydrogenase	Bradyrhizobium sp. ORS278	0	0	0	0	0	0	0	0	0	0	0	0	0.000771506	0	0	0	0	0
602	UniRef100_Q6WNY9	1	Beta-tubulin (Fragment)	Hexamita inflata	0	0	0	0	0	0	0	0.00145913	0	0	0	0	0	0.00116768	0	0	0	0
603	UniRef100_A5B9P8	4	Putative uncharacterized protein	Vitis vinifera	0	0	0	0	0	0	0	0	0	0	0	0	0	0	0	0	0.00200026	0
604	UniRef100_Q5NDC0	1	Serine proteinase	Penicillium chrysogenum	0	0	0	0	0	0	0	0	0	0	0	0	0	0	0.00194885	0	0	0
605	UniRef100_Q0V2B5	1	Putative uncharacterized protein	Phaeosphaeria nodorum	0	0	0	0	0	0	0	0	0	0.00110548	0	0	0	0	0	0	0	0
606	UniRef100_Q5B3S7	1	RS9_PODAN 40S ribosomal protein S9 (S7)	Emericella nidulans	0	0	0	0	0	0	0	0	0	0	0	0.00230836	0	0	0	0	0	0
607	UniRef100_A8DPS4	1	Alcohol oxidase	Gloeophyllum trabeum	0	0	0	0	0	0	0	0	0	0	0	0	0	0.000681593	0	0	0	0
608	UniRef100_A2DNL6	1	Putative uncharacterized protein	Trichomonas vaginalis G3	0	0	0	0	0	0.00199914	0	0	0	0	0	0	0	0	0	0	0	0
609	UniRef100_B9DGH8	6	AT3G60750 protein (Fragment)	Arabidopsis thaliana	0	0	0	0.000579663	0	0	0	0	0	0	0	0	0	0	0	0	0	0
610	UniRef100_A4RHW7	11	Putative uncharacterized protein	Magnaporthe grisea	0	0	0	0	0	0	0	0	0	0	0.00306825	0	0	0.00226386	0	0	0	0
611	UniRef100_Q0UVK1	1	Putative uncharacterized protein	Phaeosphaeria nodorum	0	0	0	0	0	0	0	0	0.000959871	0	0	0	0	0	0	0	0	0
612	UniRef100_P13794	1	Outer membrane porin F	Pseudomonas	0.000852263	0.00258282	0.000801474	0.00148158	0.000923273	0.000806433	0	0.00187956	0	0.00210791	0.00101928	0.000755106	0.00306641	0.00300825	0.00394394	0.00526891	0.00257322	0.00309655
613	UniRef100_A5B4I8	2	Putative uncharacterized protein	Vitis vinifera	0	0	0	0	0	0	0	0	0	0	0	0	0.000662704	0	0	0	0	0
614	UniRef100_A8N5X6	1	Putative uncharacterized protein	Coprinopsis cinerea okayama7#130	0	0	0	0	0	0	0	0	0	0	0	0	0	0.00219662	0	0	0	0
615	UniRef100_D0SB02	1	Outer membrane protein A	Acinetobacter johnsonii SH046	0	0	0	0	0	0	0	0	0.0010109	0	0	0	0	0	0	0	0	0
616	UniRef100_A5V4K4	1	OmpA/MotB domain protein	Sphingomonas wittichii RW1	0	0	0	0	0	0.00127559	0	0	0	0	0	0.0011944	0.00097007	0	0	0	0	0
617	UniRef100_A5VBP4	1	Short-chain dehydrogenase/reductase SDR	Sphingomonas wittichii RW1	0	0	0	0.00158933	0	0.00173017	0	0	0.00127925	0	0	0	0	0	0	0	0	0
618	UniRef100_Q5QJB4	1	Harpin binding protein 1	Solanum lycopersicum	0	0	0.0017133	0	0	0	0	0	0	0.00150201	0	0	0.001311	0	0	0	0	0
619	UniRef100_B9SYN6	3	Nutrient reservoir, putative	Ricinus communis	0	0	0	0	0	0.0013365	0	0	0	0	0	0	0	0	0	0	0.00142153	0.00102638
620	UniRef100_B8N3P1	1	Aspartic endopeptidase Pep2	Aspergillus	0	0	0	0	0	0	0	0	0	0	0	0.0011222	0.000911426	0	0	0.000870041	0	0
621	UniRef100_A1DCR4	7	Malate dehydrogenase	Neosartorya fischeri NRRL 181	0	0	0.00139079	0	0	0.0013994	0	0	0.00103468	0	0	0	0	0	0	0	0	0
622	UniRef100_B5H4T6	1	Putative uncharacterized protein	Streptomyces pristinaespiralis ATCC 25486	0	0	0	0	0	0	0	0	0	0	0	0	0.000944742	0	0.000506293	0	0	0
623	UniRef100_B2W4A9	2	14-3-3 protein epsilon	Pyrenophora tritici-repentis Pt-1C-BFP	0	0	0	0	0	0.00098918	0	0	0	0	0	0	0	0	0.00161256	0	0	0
624	UniRef100_A9QVW1	4	Lipase	Gossypium hirsutum	0	0.00137657	0	0	0	0	0	0	0	0	0	0	0	0	0	0	0.00137145	0.000990224
625	UniRef100_Q2GQV4	2	Putative uncharacterized protein	Chaetomium globosum	0	0	0	0	0	0	0	0	0	0.00110254	0	0	0	0	0	0.000918634	0	0.000971789
626	UniRef100_P53476	1	Actin	Toxoplasma gondii	0	0	0	0	0	0	0	0	0	0.00110254	0.00159941	0	0	0	0.00103144	0	0	0
627	UniRef100_A1CR77	30	MAP kinase kinase (Mkk2), putative	Aspergillus clavatus	0.00092774	0	0	0.000806395	0	0.000877851	0	0	0	0	0	0	0	0	0	0	0	0
628	UniRef100_B9T487	1	DUF26 domain-containing protein 1, putative	Ricinus communis	0	0	0	0	0	0	0	0	0	0	0	0	0.00128767	0	0	0	0	0.00130033
629	UniRef100_B5BQV5	1	Cathepsin B-like cysteine protease (Fragment)	Raphanus sativus	0	0	0	0	0	0	0	0	0	0	0	0	0	0.00129364	0	0.00201403	0	0
630	UniRef100_B2VV71	2	Cip2	Pyrenophora tritici-repentis Pt-1C-BFP	0	0	0	0	0	0	0	0	0	0	0	0	0.000923052	0	0.000989338	0	0	0
631	UniRef100_C6T9E5	1	Putative uncharacterized protein	Glycine max	0	0	0	0	0	0	0	0	0	0	0	0	0	0	0	0.000887934	0	0.000939313
632	UniRef100_A1Z1Z6	1	Catalase	Prunus avium	0	0	0	0	0	0	0	0	0	0	0	0.000905514	0	0	0.000788253	0	0	0
633	UniRef100_A6V123	2	30S ribosomal protein S16	Pseudomonas aeruginosa	0	0	0	0	0	0	0	0	0	0	0	0.00536762	0	0	0	0.00416152	0	0
634	UniRef100_A1B011	11	50S ribosomal protein L11	Paracoccus denitrificans PD1222	0	0	0	0	0	0	0	0	0	0	0	0	0	0	0	0.00230271	0.00337378	0
635	UniRef100_Q3A4E4	2	Pectate lyase	Pelobacter carbinolicus DSM 2380	0	0	0	0	0	0	0	0	0	0	0	0	0	0	0	0.000335021	0	0.000354406
636	UniRef100_C7YWL1	1	Predicted protein	Nectria haematococca mpVI 77-13-4	0	0	0	0	0	0	0	0	0	0	0.00132462	0	0	0	0	0	0	0.00080483
637	UniRef100_C7YJ69	1	Predicted protein	Nectria haematococca mpVI 77-13-4	0	0	0	0	0	0	0	0	0	0.00131605	0	0	0	0	0	0	0	0
638	UniRef100_B2AWQ6	13	Predicted CDS Pa_7_7970	Podospora anserina	0	0	0	0	0	0	0	0	0	0	0.00170362	0	0	0	0	0.000978488	0	0
639	UniRef100_B0D7B4	4	Glyceraldehyde-3-phosphate dehydrogenase	Laccaria bicolor S238N-H82	0	0	0	0	0	0	0	0	0	0	0	0	0	0.00259484	0	0	0	0
640	UniRef100_A6SG86	2	Putative uncharacterized protein	Botryotinia fuckeliana B05.10	0	0	0	0	0	0	0	0	0	0.00128345	0	0	0	0	0	0	0	0
641	UniRef100_B6TL22	18	Protein P21	Zea mays	0	0	0	0	0	0	0	0	0	0.00168519	0	0	0	0	0	0.00140409	0	0
642	UniRef100_Q84R44	2	Beta-fructofuranosidase, insoluble isoenzyme 3, putative, expressed	Oryza sativa Japonica Group	0	0	0.00129553	0	0	0	0	0	0	0	0	0	0	0	0	0	0	0
643	UniRef100_C7PRK1	1	Glyceraldehyde-3-phosphate dehydrogenase, type I	Chitinophaga pinensis DSM 2588	0	0	0	0	0	0	0	0	0	0	0	0	0	0	0.0011474	0	0	0
644	UniRef100_A6RW49	1	Fructose-bisphosphate aldolase	Botryotinia fuckeliana B05.10	0	0	0	0	0.00151314	0	0	0	0	0	0	0	0	0	0	0	0.00140574	0
645	UniRef100_C6TDZ7	3	Putative uncharacterized protein	Glycine max	0	0	0	0	0	0	0	0	0	0	0	0	0	0	0	0.000941161	0.00137893	0
646	UniRef100_Q38793	1	Ribulose bisphosphate carboxylase small chain, chloroplastic	Aegilops tauschii	0	0	0	0	0	0	0	0	0	0	0	0	0	0.00253553	0	0	0	0
647	UniRef100_B9S1V6	4	2,3-bisphosphoglycerate-independent phosphoglycerate mutase	Ricinus communis	0	0	0	0	0	0	0	0	0	0.000740278	0	0	0.000646136	0	0	0	0	0
648	UniRef100_C5DH87	1	KLTH0E02200p	Lachancea thermotolerans CBS 6340	0	0	0.000606243	0	0	0	0	0	0	0	0	0	0	0	0	0	0	0
649	UniRef100_A6SRA3	10	Putative uncharacterized protein	Botryotinia fuckeliana B05.10	0	0	0	0	0	0	0.00111807	0	0	0	0	0	0	0	0	0	0	0
650	UniRef100_UPI0000D9BCFF		PREDICTED: similar to Transmembrane emp24 domain-containing protein 10 precursor (Transmembrane protein Tmp21) (21 kDa transmembrane trafficking protein) (p24delta) (S31III125) (S31I125) (Tmp-21-I)	Macaca mulatta	0	0	0	0	0	0	0	0	0	0	0	0	0	0	0	0	0	0.00108748
651	UniRef100_C0LEE6	1	ATP:ADP antiporter	Piriformospora indica	0	0	0	0	0	0	0	0	0	0	0	0	0	0.00280834	0	0	0	0
652	UniRef100_D1H531	2	Whole genome shotgun sequence of line PN40024, scaffold_4.assembly12x (Fragment)	Vitis vinifera	0.00205239	0	0	0	0	0	0	0.00226315	0	0	0	0	0	0	0	0	0	0
653	UniRef100_C5IW59	2	Glutamine synthetase	Lolium perenne	0	0.00142684	0	0	0	0	0.00118088	0	0	0	0	0	0	0	0	0	0	0
654	UniRef100_A1RH80	3	Putative uncharacterized protein	Shewanella sp. W3-18-1	0.00605825	0	0	0	0	0	0	0	0.00423846	0	0	0	0	0	0	0	0	0
655	UniRef100_A3RRN0	29	Glutamate/aspartate-binding protein	Ralstonia solanacearum	0	0	0	0	0	0	0	0.0015488	0	0	0	0	0	0.00123943	0	0	0	0
656	UniRef100_B4F9T3	6	Putative uncharacterized protein	Zea mays	0	0	0	0	0	0	0.000817888	0	0	0	0	0	0	0	0	0	0	0
657	UniRef100_B2B1H6	2	Predicted CDS Pa_3_10150	Podospora anserina	0	0	0	0	0	0	0	0	0	0	0	0	0	0.00282622	0	0	0	0
658	UniRef100_A9PEX3	5	Cytochrome b6-f complex iron-sulfur subunit	Populus trichocarpa	0	0	0	0	0	0	0	0	0	0.00180242	0	0	0	0	0	0	0	0
659	UniRef100_Q1CX36	1	ATP synthase subunit beta	Myxococcus xanthus DK 1622	0	0	0	0	0	0	0	0.00115275	0	0	0	0	0	0	0	0	0	0
660	UniRef100_B5EMD0	1	Translation initiation factor IF-2	Acidithiobacillus ferrooxidans	0	0.000580521	0	0	0	0	0	0	0	0	0	0	0	0	0	0	0	0
661	UniRef100_C6XYB3	1	OmpA/MotB domain protein	Pedobacter heparinus DSM 2366	0	0.00114147	0	0	0	0	0	0	0	0	0	0	0	0	0	0	0	0
662	UniRef100_Q8PZ67	2	F420H2 dehydrogenase subunit FpoF	Methanosarcina mazei	0	0	0	0	0	0	0	0	0	0	0.00173808	0	0	0	0	0	0	0
663	UniRef100_B2VS63	1	WD repeat containing protein 51A	Pyrenophora tritici-repentis Pt-1C-BFP	0	0	0	0	0	0	0	0	0	0	0	0	0.00114505	0	0	0	0	0.00115631
664	UniRef100_B8N000	2	Isocitrate dehydrogenase Idp1, putative	Aspergillus flavus NRRL3357	0	0	0	0	0	0	0	0	0	0	0	0	0	0	0.000774093	0	0	0
665	UniRef100_A1Y0H0	26	Elongation factor 1a (Fragment)	Tetragonula minor	0	0	0	0	0	0	0	0	0	0	0	0	0	0	0	0	0.00253033	0.00182696
666	UniRef100_A9XIZ5	1	Translation elongation factor 1 alpha (Fragment)	Cordyceps cf. pruinosa EFCC 5693	0	0	0	0	0	0	0	0	0	0	0.00180053	0	0	0.00132849	0	0	0	0
667	UniRef100_A7UGA7	4	Chitinase (Fragment)	Cucurbita moschata	0	0	0	0	0	0	0	0	0	0	0	0	0	0	0.00120068	0	0	0
668	UniRef100_Q96VL0	1	Superoxide dismutase [Cu-Zn]	Claviceps purpurea	0	0	0	0	0	0	0	0	0	0	0.00390504	0	0	0	0	0	0	0
669	UniRef100_UPI000023E94A	1	hypothetical protein FG09341.1	Gibberella zeae PH-1	0	0	0	0	0	0	0	0	0	0.000658025	0	0	0	0	0	0	0	0
670	UniRef100_Q565W5	1	Spermidine synthase	uncultured bacterium	0	0	0	0	0	0	0	0	0	0	0	0	0	0	0	0	0	0.00161678
671	UniRef100_B9GFF3	1	Predicted protein	Populus trichocarpa	0	0	0	0	0	0	0	0	0	0	0	0	0	0	0	0	0	0.000939313
672	UniRef100_B9T7S8	1	Putative uncharacterized protein	Ricinus communis	0	0	0	0	0.00140395	0	0	0	0	0	0	0	0	0	0	0	0	0
673	UniRef100_B3N2H1	3	GF20391	Drosophila ananassae	0	0	0	0	0	0	0	0	0	0	0.00256998	0	0	0	0	0	0	0
674	UniRef100_B5GE40	1	Putative uncharacterized protein (Fragment)	Streptomyces sp. SPB74	0	0	0	0	0	0	0	0.000925662	0	0	0	0	0	0	0	0	0	0
675	UniRef100_C5TF84	2	Heme exporter protein CcmA	Zymomonas mobilis subsp. mobilis ATCC 10988	0	0.00229844	0	0	0	0	0	0	0	0	0	0	0	0	0	0	0	0
676	UniRef100_A7LNX7	3	Thioredoxin	Limonium bicolor	0	0	0	0.00232482	0	0	0	0	0	0	0	0	0	0	0	0	0	0
677	UniRef100_Q8J1Y0	1	70 kDa heat shock protein 2	Rhizopus stolonifer	0	0	0	0	0	0.000737667	0	0	0	0	0	0	0	0	0	0	0	0
678	UniRef100_A1DCL5	14	40S ribosomal protein S13	Neosartorya fischeri NRRL 181	0	0	0	0.00264889	0	0	0	0	0	0	0	0	0	0	0	0	0	0
679	UniRef100_A0AWZ6	2	Fucose-binding lectin II	Burkholderia cenocepacia	0	0	0	0	0	0	0	0	0	0.001699	0	0	0	0	0	0	0	0
680	UniRef100_Q7RWN7	1	Predicted protein	Neurospora crassa	0	0	0	0	0	0	0	0	0	0	0	0.00130267	0	0	0	0	0	0
681	UniRef100_Q94A28	2	Aconitate hydratase 3, mitochondrial	Arabidopsis thaliana	0	0	0	0	0	0	0	0	0	0	0	0	0	0	0.000389769	0	0	0
682	UniRef100_B1W035	2	Metalloendopeptidase griselysin	Streptomyces griseus subsp. griseus NBRC 13350	0	0	0.000694375	0	0	0	0	0	0	0	0	0	0	0	0	0	0	0
683	UniRef100_B9RTX7	1	Glucose-1-phosphate adenylyltransferase	Ricinus communis	0	0	0	0.000820012	0	0	0	0	0	0	0	0	0	0	0	0	0	0
684	UniRef100_Q9Y707	1	Actin-2	Suillus bovinus	0	0	0	0	0	0	0	0	0	0	0	0	0	0	0.00103419	0	0	0
685	UniRef100_A7F700	1	Putative uncharacterized protein	Sclerotinia sclerotiorum 1980 UF-70	0	0	0	0	0	0	0	0	0	0	0	0	0	0	0	0.00180841	0	0
686	UniRef100_A5ACX0	5	Putative uncharacterized protein	Vitis vinifera	0	0	0	0	0	0	0	0	0	0	0	0	0	0	0	0	0.00104559	0
687	UniRef100_A1CA34	30	ABC transporter, putative	Aspergillus clavatus	0	0	0	0	0	0.000748106	0	0	0	0	0	0	0	0	0	0	0	0
688	UniRef100_Q0UCL1	1	Putative uncharacterized protein	Phaeosphaeria nodorum	0	0	0	0	0	0	0	0	0	0	0	0	0	0.00095423	0	0	0	0
689	UniRef100_C6T868	3	Putative uncharacterized protein	Glycine max	0	0	0	0	0	0	0	0	0	0	0	0	0	0	0	0	0	0.00135834
690	UniRef100_A5BIU6	6	Putative uncharacterized protein	Vitis vinifera	0	0	0	0	0	0	0	0	0	0.000987037	0	0	0	0	0	0.000822396	0	0
691	UniRef100_A1DK93	1	Secreted glucosidase	Neosartorya fischeri NRRL 181	0	0	0	0	0	0	0	0	0	0	0	0.00312641	0	0	0	0	0	0
692	UniRef100_B0RKF0	1	Porin	Herbaspirillum seropedicae	0	0	0	0	0	0	0	0	0	0	0	0.0011512	0.000934977	0	0	0	0	0
693	UniRef100_C5Y5G7	1	Putative uncharacterized protein Sb05g023220	Sorghum bicolor	0	0	0	0	0	0	0	0	0	0	0	0.00153625	0	0	0.00133731	0	0	0
694	UniRef100_D0Y4C8	1	Membrane protein involved in aromatic hydrocarbon degradation	Caulobacter segnis ATCC 21756	0	0	0	0	0	0	0	0	0	0	0	0.00100115	0	0	0	0	0	0.000821107
695	UniRef100_B9JEF2	1	Porin outer membrane protein	Agrobacterium radiobacter K84	0	0	0	0	0	0	0	0	0	0	0	0	0	0	0.000989338	0	0.00129099	0
696	UniRef100_A2TSA3	1	Two-component system, transcriptional regulatory protein	Dokdonia donghaensis MED134	0	0	0	0	0	0	0	0	0	0.00184247	0	0	0.00160816	0	0	0	0	0
697	UniRef100_A1C444	2	Beta-N-acetylhexosaminidase NagA, putative	Aspergillus clavatus	0	0	0	0	0	0	0	0	0	0	0	0	0	0	0	0	0	0.000606965
698	UniRef100_C9NFC1	1	Xylose isomerase domain protein TIM barrel	Streptomyces flavogriseus ATCC 33331	0	0	0	0	0	0	0	0	0	0	0	0	0.0010051	0	0.00107728	0	0	0
699	UniRef100_A1SNN5	33	Elongation factor Tu	Nocardioides sp. JS614	0	0	0	0	0.00137212	0	0	0	0	0	0	0	0.000911426	0	0	0	0	0
700	UniRef100_Q2NU70	1	Outer membrane protein A	Sodalis glossinidius str. 'morsitans'	0	0	0	0	0	0	0	0	0	0	0	0	0	0	0	0	0.00284307	0
701	UniRef100_A9FNQ8	1	Probable Inorganic polyphosphate/ATP-NAD kinase	Sorangium cellulosum 'So ce 56'	0	0	0	0	0	0	0	0	0	0	0	0	0	0	0	0.00109653	0	0.00115998
702	UniRef100_B2WBD2	6	Arabinofuranosidase/B-xylosidase	Pyrenophora tritici-repentis Pt-1C-BFP	0	0	0	0	0	0	0	0	0	0	0	0	0	0	0.000760432	0.000677267	0	0
703	UniRef100_B0FXM0	12	Endo-1,4-beta-xylanase	Hypocrea pseudokoningii	0	0	0	0	0	0.00212409	0	0	0.0015705	0	0	0	0	0	0	0	0	0
704	UniRef100_C6SWY1	1	Putative uncharacterized protein	Glycine max	0	0	0	0	0	0.00710143	0	0	0.00525064	0	0	0	0	0	0	0	0	0
705	UniRef100_Q8SIE9	1	ATP synthase subunit alpha (Fragment)	Galax urceolata	0	0	0	0	0	0.00119247	0	0	0.000881686	0	0	0	0	0	0	0	0	0
706	UniRef100_A9ADI9	3	30S ribosomal protein S7	Burkholderia	0	0	0	0	0	0	0	0	0	0	0	0	0.00231946	0	0	0.00221414	0	0
707	UniRef100_B9H5L4	2	Predicted protein	Populus trichocarpa	0	0	0	0	0.0016761	0	0	0	0	0	0	0	0	0	0	0	0.00155713	0
708	UniRef100_B6TCE9	1	Peptidyl-prolyl cis-trans isomerase	Zea mays	0	0	0	0	0	0	0	0	0	0.0016716	0	0	0.00145902	0	0	0	0	0
709	UniRef100_A4ALW8	2	30S ribosomal protein S9	marine actinobacterium PHSC20C1	0	0	0	0	0	0	0	0	0	0	0.00357962	0	0.00215379	0	0	0	0	0
710	UniRef100_A1C636	16	Glucose-6-phosphate isomerase	Aspergillus clavatus	0	0.000907063	0	0	0	0.000849635	0	0	0	0	0	0	0	0	0	0	0	0
711	UniRef100_A7J0K4	1	Putative polyphenol oxidase (Fragment)	Frangula californica	0	0	0	0	0	0	0	0	0	0.0013287	0	0	0	0	0	0	0.00162201	0
712	UniRef100_Q86ZV6	1	Heat shock cognate protein 70 (Fragment)	Rhizopus stolonifer	0	0	0	0	0	0	0.000774207	0	0.000647868	0	0	0	0	0	0	0	0	0
713	UniRef100_Q5D862	2	Filaggrin-2	Homo sapiens	0	0	0	0	0	0	0	0	0	0	0	0	0	0.000185578	0.0001622	0	0	0
714	UniRef100_A1D8X9	2	Aldehyde dehydrogenase	Neosartorya fischeri NRRL 181	0	0	0.000959168	0	0	0	0	0	0.000713575	0	0	0	0	0	0	0	0	0
715	UniRef100_P29409	1	Phosphoglycerate kinase, chloroplastic (Fragment)	Spinacia oleracea	0.00116128	0	0	0	0	0	0.000970888	0	0	0	0	0	0	0	0	0	0	0
716	UniRef100_B9SVA7	1	Aspartic proteinase, putative	Ricinus communis	0.000978278	0	0	0	0	0	0	0	0	0	0	0	0	0	0	0	0.000984565	0
717	UniRef100_C8VPM8	2	Endo-1,4-beta-xylanase C (Xylanase C)(EC 3.2.1.8)(1,4-beta-D-xylan xylanohydrolase C)(34 kDa xylanase)(Xylanase X34) [Source:UniProtKB/Swiss-Prot;Acc:Q00177]	Aspergillus nidulans FGSC A4	0	0	0	0	0	0	0	0	0	0	0	0	0	0	0	0.00105629	0.0015476	0
718	UniRef100_UPI0000E802F6		PREDICTED: similar to putative DNA dependent ATPase and helicase	Gallus gallus	0	0	0	0	0	0	0	0	0	0	0	0	0	0	0.000153107	0	0	0
719	UniRef100_Q5B2V1	1	Heat shock 70 kDa protein	Emericella nidulans	0	0	0	0	0	0	0	0	0	0	0	0	0	0.000689002	0	0	0.000785817	0
720	UniRef100_C0JX32	1	Photosystem II D2 protein	Pyramimonas parkeae	0	0	0	0	0	0	0	0	0.000999411	0	0	0	0	0	0	0.000981268	0	0
721	UniRef100_C9SH36	1	Fumarate reductase	Verticillium albo-atrum VaMs.102	0	0	0	0.000704945	0	0	0	0	0	0.000668638	0	0	0	0	0	0	0	0
722	UniRef100_A5BE19	2	Phosphoribulokinase	Vitis vinifera	0.00123244	0	0	0.00107124	0	0	0	0	0	0	0	0	0	0	0	0	0	0
723	UniRef100_A2Q3K0	4	AAA ATPase; ABC transporter, transmembrane region, type 1	Medicago truncatula	0	0.000337736	0	0	0	0	0.000279518	0	0	0	0	0	0	0	0	0	0	0
724	UniRef100_A5AYR7	25	Putative uncharacterized protein	Vitis vinifera	0.00120584	0	0	0	0	0	0	0	0	0	0	0	0	0	0	0.000828312	0	0
725	UniRef100_B2VTZ4	2	Histone H4	Pleosporales	0	0	0	0	0	0.00461937	0	0	0	0	0	0	0	0	0	0	0	0
726	UniRef100_B0CVI2	1	Predicted protein	Laccaria bicolor S238N-H82	0	0	0	0	0	0	0	0	0	0	0	0	0	0.00283525	0	0	0	0
727	UniRef100_Q5KFB9	1	ATP synthase subunit alpha	Filobasidiella neoformans	0	0	0	0	0	0	0	0	0	0	0	0	0	0.0016434	0	0	0	0
728	UniRef100_B9HL67	2	Predicted protein	Populus trichocarpa	0	0.00114922	0	0.000988837	0	0	0	0	0	0	0	0	0	0	0	0	0	0
729	UniRef100_UPI000187E33E		hypothetical protein MPER_09405	Moniliophthora perniciosa FA553	0	0	0	0	0	0	0	0	0	0	0	0	0	0.00341321	0	0	0	0
730	UniRef100_Q0AH86	1	HemY domain protein	Nitrosomonas eutropha C91	0	0	0	0.00111213	0	0	0	0	0	0.00105485	0	0	0	0	0	0	0	0
731	UniRef100_A1CID0	30	Vacuolar protein sorting-associated protein 26, putative	Aspergillus clavatus	0	0	0	0	0	0	0.000772784	0	0	0	0	0	0	0	0	0	0	0
732	UniRef100_A1CJP8	44	Proteasome regulatory particle subunit Rpt1, putative	Aspergillus clavatus	0	0	0	0	0	0	0	0	0	0	0	0	0	0	0	0	0.0010654	0
733	UniRef100_B2B7T6	2	Predicted CDS Pa_2_12200	Podospora anserina	0	0	0	0	0	0	0	0	0.000860128	0	0	0	0	0	0	0	0	0
734	2001373057	1	[Soil: Diversa Silage]		0	0	0.00197029	0	0	0	0	0	0	0	0	0	0	0	0	0	0	0
735	UniRef100_B4D1K7	1	Glycosyl transferase group 1	Chthoniobacter flavus Ellin428	0	0	0	0	0	0	0	0	0	0	0	0	0	0	0	0.000931014	0	0
736	UniRef100_A3U9W0	1	Putative uncharacterized protein	Croceibacter atlanticus HTCC2559	0.000409475	0	0	0	0	0	0	0	0	0	0	0	0	0	0	0	0	0
737	UniRef100_A1CUJ6	7	Ribosomal protein S13p/S18e	Aspergillus clavatus	0	0	0	0	0	0	0	0	0	0	0	0	0	0	0.00192945	0	0	0
738	UniRef100_D0XX03	1	Methyltransferase	Caulobacter segnis ATCC 21756	0	0	0	0	0	0	0	0	0	0	0	0	0	0.00146441	0	0	0	0
739	UniRef100_Q96VT4	1	Catalase-peroxidase	Emericella nidulans	0	0	0	0	0	0	0	0	0	0	0.00081377	0	0	0	0	0	0	0
740	UniRef100_A1CI63	31	Fructose-1,6-bisphosphatase	Aspergillus clavatus	0	0	0	0	0	0	0	0	0	0	0	0	0	0	0.00104816	0	0	0
741	UniRef100_A6H7D3	6	KRT18 protein (Fragment)	Bos taurus	0	0	0	0	0	0	0	0	0	0.000937909	0	0	0	0	0	0	0	0
742	UniRef100_B8H408	1	TonB-dependent outer membrane receptor	Caulobacter vibrioides	0	0	0	0	0	0	0	0	0	0	0	0	0	0	0.000344729	0	0	0
743	UniRef100_A5B2H3	2	Putative uncharacterized protein	Vitis vinifera	0	0	0	0	0	0	0	0	0	0	0	0	0	0	0.00175484	0	0	0
744	UniRef100_C3WPZ7	1	Predicted protein	Fusobacterium sp. 4_1_13	0	0	0	0	0	0	0	0	0	0	0	0	0	0	0	0	0	0.000478263
745	UniRef100_C6RLV9	1	Glutathione S-transferase domain protein	Acinetobacter radioresistens	0	0	0	0	0	0	0	0	0	0	0	0	0	0	0.00150903	0	0	0
746	UniRef100_C4M5P2	1	Putative uncharacterized protein	Entamoeba histolytica HM-1:IMSS	0	0	0	0	0	0	0	0	0	0	0	0	0	0	0	0	0.000544157	0
747	UniRef100_UPI00016C3796		Aldehyde dehydrogenase (NAD+)	Gemmata obscuriglobus UQM 2246	0	0	0	0	0	0	0.000851001	0	0	0	0	0	0	0	0	0	0	0
748	UniRef100_Q1LUB5	2	Novel protein similar to vertebrate cathepsin L (CTSL) (Fragment)	Danio rerio	0	0	0	0	0	0	0	0	0	0	0	0	0	0	0	0	0.00151517	0
749	UniRef100_P23704	1	ATP synthase subunit beta, mitochondrial	Neurospora crassa	0	0	0	0	0	0	0	0	0.000677828	0	0	0	0	0	0	0	0	0
750	UniRef100_A3Z6L9	1	Putative uncharacterized protein	Synechococcus sp. RS9917	0	0	0	0	0	0	0	0	0	0	0	0	0	0	0	0	0.00451845	0
751	UniRef100_B5GD75	1	Signal recognition particle protein (Fragment)	Streptomyces sp. SPB74	0	0	0	0	0	0	0	0	0	0	0	0	0	0	0	0	0.000877065	0
752	UniRef100_A9P8L8	1	Putative uncharacterized protein	Populus trichocarpa	0	0	0	0	0	0	0	0	0	0.00128744	0	0	0	0	0	0	0	0
753	UniRef100_B2VSL6	2	Protein transport protein Sec24	Pyrenophora tritici-repentis Pt-1C-BFP	0	0	0	0	0	0	0	0	0.000400675	0	0	0	0	0	0	0	0	0
754	UniRef100_B0DFA1	1	Predicted protein	Laccaria bicolor S238N-H82	0	0	0	0	0	0	0	0	0	0	0	0	0	0.0026101	0	0	0	0
755	UniRef100_C8VD74	2	Alpha-rhamnosidase (Eurofung)	Emericella nidulans	0	0	0	0	0	0	0	0	0	0	0	0.000492279	0	0	0	0	0	0
756	UniRef100_A8N8Z1	2	Putative uncharacterized protein	Coprinopsis cinerea okayama7#130	0	0	0	0	0	0	0	0	0.000622642	0	0	0	0	0	0	0	0	0
757	UniRef100_C1Q8I0	1	tRNA (5-methylaminomethyl-2-thiouridylate)-methyltransferase	Brachyspira murdochii DSM 12563	0	0	0	0	0	0	0	0	0	0	0	0	0	0	0.00110176	0	0	0
758	UniRef100_Q2HB08	2	Putative uncharacterized protein	Chaetomium globosum	0	0	0	0	0	0	0	0	0	0	0.00097944	0	0	0	0	0	0	0
759	UniRef100_Q0PPW6	1	Translation elongation factor-1 alpha (Fragment)	Pertusaria dactylina	0	0	0	0.00168102	0	0	0	0	0	0	0	0	0	0	0	0	0	0
760	UniRef100_B9R6T2	1	Hydrolase, hydrolyzing O-glycosyl compounds, putative	Ricinus communis	0	0	0	0	0	0	0	0	0	0	0	0.00069179	0	0	0	0	0	0
761	UniRef100_B0T8T3	1	Cold-shock DNA-binding domain protein	Caulobacter sp. K31	0	0	0	0	0	0	0	0	0	0	0	0	0	0	0	0.00192964	0	0
762	UniRef100_UPI00017EFE84		PREDICTED: similar to phosphoinositide-3-kinase adaptor protein 1	Sus scrofa	0.000555619	0	0	0	0	0	0	0	0	0	0	0	0	0	0	0	0	0
763	UniRef100_Q871C5	1	Putative uncharacterized protein	Neurospora crassa	0	0	0	0	0	0	0	0	0	0	0	0	0.0012696	0	0	0	0	0
764	UniRef100_A4UC83	5	Putative uncharacterized protein	Magnaporthe grisea	0	0	0	0	0	0	0	0	0	0	0	0	0	0	0	0.000820442	0	0
765	UniRef100_O14460	1	Elongation factor 2	Schizosaccharomyces pombe	0	0.000603273	0	0	0	0	0	0	0	0	0	0	0	0	0	0	0	0
766	UniRef100_A3RJ53	3	FliC	Pseudomonas aeruginosa	0	0	0	0	0	0	0	0	0	0	0	0	0	0	0.00158943	0	0	0
767	UniRef100_Q8I0X7	2	Histone H4 (Fragment)	Oikopleura dioica	0	0	0	0	0	0	0	0	0	0	0	0	0	0.00861587	0	0	0	0
768	UniRef100_A6RTN5	2	Putative uncharacterized protein	Botryotinia fuckeliana B05.10	0	0.00338637	0	0	0	0	0	0	0	0	0	0	0	0	0	0	0	0
769	UniRef100_A8MQH1	5	Uncharacterized protein At1g15690.2	Arabidopsis thaliana	0	0	0	0	0	0	0	0	0	0	0	0	0	0	0	0.000447998	0	0
770	UniRef100_B9G1F0	1	Putative uncharacterized protein	Oryza sativa Japonica Group	0	0	0	0	0	0	0	0	0	0	0.00294792	0	0	0	0	0	0	0
771	UniRef100_Q08ZC1	1	Aqualysin-1	Stigmatella aurantiaca DW4/3-1	0	0	0	0	0	0	0	0	0	0	0.000712531	0	0	0	0	0	0	0
772	UniRef100_B6XJK7	1	Putative uncharacterized protein	Providencia alcalifaciens DSM 30120	0	0	0.000714305	0	0	0	0	0	0	0	0	0	0	0	0	0	0	0
773	UniRef100_C0S8K9	2	Catalase B	Paracoccidioides brasiliensis Pb03	0	0	0	0	0	0	0	0	0	0	0	0.000605316	0	0	0	0	0	0
774	UniRef100_P00762	1	Anionic trypsin-1	Rattus norvegicus	0	0	0	0	0	0	0	0	0.00143005	0	0	0	0	0	0	0	0	0
775	UniRef100_D1HYH8	2	Whole genome shotgun sequence of line PN40024, scaffold_20.assembly12x (Fragment)	Vitis vinifera	0	0	0	0	0	0	0	0	0	0	0	0	0	0	0.000891541	0	0	0
776	UniRef100_Q4FMR5	1	30S ribosomal protein S6	Candidatus Pelagibacter ubique	0	0	0	0	0	0.00393219	0	0	0	0	0	0	0	0	0	0	0	0
777	UniRef100_A8REW5	1	Putative uncharacterized protein	Eubacterium dolichum DSM 3991	0	0	0.000501452	0	0	0	0	0	0	0	0	0	0	0	0	0	0	0
778	UniRef100_P14804	1	Glucoamylase	Neurospora crassa	0	0	0	0	0	0	0	0	0	0	0	0	0	0.00126776	0.00110806	0	0	0
779	UniRef100_Q0URL3	1	Putative uncharacterized protein	Phaeosphaeria nodorum	0	0	0	0	0.00172931	0	0	0	0	0	0	0	0	0	0	0	0	0
780	UniRef100_B4RV95	1	Serine hydroxymethyltransferase	Alteromonas macleodii 'Deep ecotype'	0	0	0	0	0	0	0	0	0	0	0	0.00106582	0	0	0	0	0	0
781	UniRef100_B6ZHC1	1	PR-5 protein (Fragment)	Glycine max	0	0	0	0	0	0	0	0	0	0	0	0.00387402	0	0	0	0	0	0
782	UniRef100_B9RC66	1	Osmotin, putative	Ricinus communis	0	0	0	0	0	0	0	0	0	0	0	0.00198006	0	0	0	0	0	0
783	UniRef100_P81370	1	Thaumatin-like protein	Actinidia deliciosa	0	0	0	0	0	0	0	0	0	0	0	0.00198006	0	0	0	0	0	0
784	UniRef100_Q16KW4	1	Trypsin	Aedes aegypti	0	0	0	0	0	0	0	0	0	0	0	0.00163192	0	0	0	0	0	0
785	UniRef100_Q9FF04	1	Osmotin-like protein (Fragment)	Fagus sylvatica	0	0	0	0	0	0	0	0	0	0	0	0.0035641	0	0	0	0	0	0
786	UniRef100_A1WRT4	1	Porin, gram-negative type	Verminephrobacter eiseniae EF01-2	0	0	0	0	0	0	0	0	0	0	0	0	0	0	0	0	0	0.000944167
787	UniRef100_Q8J1D1	2	Beta-tubulin (Fragment)	Nephromopsis laureri	0	0	0	0	0	0	0	0	0	0	0	0	0	0	0	0	0	0.00136851
788	UniRef100_A6PUQ8	1	ROK family protein (Fragment)	Victivallis vadensis ATCC BAA-548	0	0	0	0	0	0	0	0	0	0	0	0.00121063	0	0	0	0	0	0
789	UniRef100_C7ZBE2	1	Putative uncharacterized protein	Nectria haematococca mpVI 77-13-4	0	0	0	0	0	0	0	0	0	0	0	0.00107872	0	0	0	0	0	0
790	UniRef100_C9SU67	1	Pectin lyase	Verticillium albo-atrum VaMs.102	0	0	0	0	0	0	0	0	0	0	0	0.00114823	0	0	0	0	0	0
791	UniRef100_B7G0M9	5	ATP synthase gamma chain	Phaeodactylum tricornutum CCAP 1055/1	0	0	0	0	0	0	0	0	0	0	0	0	0.000977936	0	0	0	0	0
792	UniRef100_C1YMY4	1	Glutamate dehydrogenase (NADP)	Nocardiopsis dassonvillei subsp. dassonvillei DSM 43111	0	0	0	0	0	0	0	0	0	0	0	0	0.0007935	0	0	0	0	0
793	UniRef100_A1C700	23	V-type ATPase, B subunit, putative	Aspergillus clavatus	0	0	0	0	0	0	0	0	0	0	0	0	0	0	0.000755985	0	0	0
794	UniRef100_A2RB25	33	Contig An18c0170, complete genome	Aspergillus niger CBS 513.88	0	0	0	0	0	0	0	0	0	0	0	0	0	0	0.000789858	0	0	0
795	UniRef100_A4QVR2	9	Histone H2A.Z	Magnaporthe grisea	0	0	0	0	0	0	0	0	0	0	0	0	0	0	0.00271203	0	0	0
796	UniRef100_A6C5L5	5	Probable D-arabino 3-hexulose 6-phosphate formaldehyde lyase (Hps-2)	Planctomyces maris DSM 8797	0	0	0	0	0	0	0	0	0	0	0	0	0	0	0.00203047	0	0	0
797	UniRef100_B9GKL2	2	Predicted protein	Populus trichocarpa	0	0	0	0	0	0	0	0	0	0	0	0	0	0	0.00172365	0	0	0
798	UniRef100_P07505	1	Superoxide dismutase [Cu-Zn], chloroplastic	Spinacia oleracea	0	0	0	0	0	0	0	0	0	0	0	0	0	0	0.00174694	0	0	0
799	UniRef100_Q5PYQ1	1	Chloroplast chlorophyll A/B binding protein (Fragment)	Manihot esculenta	0	0	0	0	0	0	0	0	0	0	0	0	0	0	0.00159597	0	0	0
800	UniRef100_Q9F3Q2	1	Secreted extracellular small neutral protease	Streptomyces coelicolor	0	0	0	0	0	0	0	0	0	0	0	0	0.00198811	0	0	0	0	0
801	UniRef100_B2WE48	1	Exo-beta 1,3 glucanase	Pyrenophora tritici-repentis Pt-1C-BFP	0	0	0	0	0	0	0	0	0	0	0	0	0	0	0	0	0	0.000464285
802	UniRef100_Q35784	3	Sorghum bicolor URF209	Sorghum bicolor	0	0	0	0	0	0	0	0	0	0	0	0	0	0	0	0	0	0.00166846
803	UniRef100_Q4SSF0	2	Chromosome undetermined SCAF14457, whole genome shotgun sequence	Tetraodon nigroviridis	0	0	0	0	0	0	0	0	0	0	0	0	0	0	0	0	0	0.00024441
804	UniRef100_UPI0001AED5D2		chitinase III	Streptomyces roseosporus NRRL 11379	0	0	0	0	0	0	0	0	0	0	0	0	0	0	0	0	0	0.000617217
805	UniRef100_A7THA4	2	ATP synthase subunit beta	Vanderwaltozyma polyspora DSM 70294	0	0	0	0	0	0.000942169	0	0	0	0	0	0	0	0	0	0	0	0
806	UniRef100_A7IKP0	1	RNA methyltransferase, TrmH family, group 3	Xanthobacter autotrophicus Py2	0	0	0	0	0	0	0	0.00192525	0	0	0	0	0	0	0	0	0	0
807	UniRef100_A9V5E8	1	Glyceraldehyde-3-phosphate dehydrogenase	Monosiga brevicollis	0	0	0	0	0	0	0	0	0	0	0	0	0	0	0.00109864	0	0	0
808	UniRef100_Q2GWE1	1	NADP-specific glutamate dehydrogenase	Chaetomium globosum	0	0	0	0	0	0	0	0	0	0	0	0	0	0	0.000859912	0	0	0
809	2001393963	1	ABC-type antimicrobial peptide transport system, permease component [Soil: Diversa Silage]		0.00408809	0	0	0	0	0	0	0	0	0	0	0	0	0	0	0	0	0
810	UniRef100_B1Q486	10	Putative aconitase	Capsicum chinense	0	0	0	0	0	0	0	0	0	0	0	0	0	0	0	0	0.000507589	0
811	UniRef100_B2WBU9	2	60S ribosomal protein L21-A	Pyrenophora tritici-repentis Pt-1C-BFP	0	0	0	0	0	0.00297372	0	0	0	0	0	0	0	0	0	0	0	0
812	UniRef100_Q5FZN9	3	Alkaline serine protease	Lecanicillium psalliotae	0	0	0	0	0	0	0	0	0	0	0	0	0	0	0	0	0.00132478	0
813	UniRef100_A5ABL8	7	Similarity to several oxidoreductases	Aspergillus niger CBS 513.88	0	0	0	0	0	0	0	0	0	0	0	0	0	0	0	0	0	0.00129114
814	UniRef100_B8B3Z3	3	Putative uncharacterized protein	Oryza sativa Indica Group	0	0	0	0	0	0	0	0	0	0	0	0	0	0	0	0	0	0.000538134
815	UniRef100_P02723	1	ADP,ATP carrier protein	Neurospora crassa	0	0	0	0	0	0	0	0	0	0	0	0	0	0	0	0	0	0.00116739
816	UniRef100_A1C9H8	12	Mitochondrial cytochrome b2, putative	Aspergillus clavatus	0	0	0	0	0	0	0	0	0.00068045	0	0	0	0	0	0	0	0	0
817	UniRef100_A8P9E0	4	Putative uncharacterized protein	Coprinopsis cinerea okayama7#130	0	0	0	0	0	0	0	0	0.000303793	0	0	0	0	0	0	0	0	0
818	UniRef100_C3K0T0	5	Putative outer membrane porin A protein	Pseudomonas fluorescens SBW25	0	0	0	0	0	0	0	0	0.00107912	0	0	0	0	0	0	0	0	0
819	UniRef100_A0MVQ2	20	30S ribosomal protein S7 (Fragment)	Pseudomonas	0	0	0	0	0	0	0.00267767	0	0	0	0	0	0	0	0	0	0	0
820	UniRef100_A1JS11	50	30S ribosomal protein S5	Yersinia	0	0	0	0	0	0	0.00248754	0	0	0	0	0	0	0	0	0	0	0
821	UniRef100_A8N392	1	Putative uncharacterized protein	Coprinopsis cinerea okayama7#130	0	0	0	0	0	0	0.000499281	0	0	0	0	0	0	0	0	0	0	0
822	UniRef100_B0Y6S9	3	3-ketoacyl-coA thiolase peroxisomal A	Aspergillus fumigatus	0	0	0	0	0	0.00113555	0	0	0	0	0	0	0	0	0	0	0	0
823	UniRef100_A4KU98	2	PEAt1	Alternaria tenuissima	0	0	0.00224109	0	0	0	0	0	0	0	0	0	0	0	0	0	0	0
824	UniRef100_Q2XPZ4	1	Eukaryotic ADP/ATP carrier	Cryptococcus neoformans var. grubii	0	0	0.00148235	0	0	0	0	0	0	0	0	0	0	0	0	0	0	0
825	UniRef100_B2GLR0	1	Dethiobiotin synthetase	Kocuria rhizophila DC2201	0	0	0	0	0	0.00143745	0	0	0	0	0	0	0	0	0	0	0	0
826	2001296779	21	Ribosomal protein S5 [Soil: Diversa Silage]		0	0	0	0	0	0	0	0	0	0	0	0	0	0	0	0	0.0023648	0
827	UniRef100_A0PCX2	3	Epl1 protein	Trichoderma atroviride	0	0	0	0	0	0	0	0	0	0	0	0	0	0	0	0	0.00366715	0
828	UniRef100_Q43621	2	Glutathione reductase, cytosolic	Pisum sativum	0	0	0	0	0	0	0	0	0	0	0	0	0.000726579	0	0	0	0	0
829	UniRef100_A2WDF0	29	50S ribosomal protein L14	Burkholderia dolosa AUO158	0	0	0	0	0	0	0	0.00342266	0	0	0	0	0	0	0	0	0	0
830	UniRef100_B2VRW7	1	Carboxypeptidase cpdS	Pyrenophora tritici-repentis Pt-1C-BFP	0	0	0	0	0.000994035	0	0	0	0	0	0	0	0	0	0	0	0	0
831	UniRef100_B2W1Z4	1	Cytochrome b-c1 complex subunit 2, mitochondrial	Pyrenophora tritici-repentis Pt-1C-BFP	0	0	0	0	0	0	0	0	0.000768106	0	0	0	0	0	0	0	0	0
832	UniRef100_B2W4A6	1	Mitochondrial-processing peptidase subunit beta	Pyrenophora tritici-repentis Pt-1C-BFP	0	0	0	0	0	0	0	0	0.000750091	0	0	0	0	0	0	0	0	0
833	UniRef100_C0SE56	8	Mitochondrial-processing peptidase subunit beta	Paracoccidioides brasiliensis Pb03	0	0	0	0	0	0	0	0	0.000734431	0	0	0	0	0	0	0	0	0
834	UniRef100_C9SUS9	1	Malate dehydrogenase	Verticillium albo-atrum VaMs.102	0	0	0	0	0	0	0	0	0.00106604	0	0	0	0	0	0	0	0	0
835	UniRef100_B0T2D6	5	30S ribosomal protein S8	Caulobacter sp. K31	0	0	0	0	0	0	0	0	0	0	0	0	0	0	0	0	0	0.00276813
836	UniRef100_A6VC67	3	50S ribosomal protein L25	Pseudomonas aeruginosa PA7	0	0	0	0	0	0	0	0	0	0	0	0	0	0	0.00190108	0	0	0
837	UniRef100_B1LV99	2	Formaldehyde-activating enzyme	Methylobacterium radiotolerans JCM 2831	0	0	0	0	0	0	0	0	0	0	0	0	0	0	0.0022813	0	0	0
838	UniRef100_Q6L8H5	1	Nucleoside diphosphate kinase	Codonopsis lanceolata	0	0	0	0.00295315	0	0	0	0	0	0	0	0	0	0	0	0	0	0
839	UniRef100_Q8GW78	3	Putative uncharacterized protein At4g12060/F16J13_130	Arabidopsis thaliana	0	0	0	0	0	0	0	0	0	0	0	0	0	0	0	0.00129366	0	0
840	UniRef100_Q9HEZ3	2	Prepropenicillopepsin-JT3	Penicillium janthinellum	0.00127623	0	0	0	0	0	0	0	0	0	0	0	0	0	0	0	0	0
841	UniRef100_Q9C643	2	Xylan endohydrolase isoenzyme, putative	Arabidopsis thaliana	0	0	0	0	0	0	0	0	0	0	0	0	0	0	0	0.00037667	0	0
842	UniRef100_A2QBM7	6	Similarity to high-affinity glucose transporter HGT1 - Kluyveromyces lactis	Aspergillus niger CBS 513.88	0	0	0	0	0	0	0	0	0	0	0.00108748	0	0	0	0	0	0	0
843	UniRef100_A3PG28	1	Aminoglycoside phosphotransferase	Rhodobacter sphaeroides ATCC 17029	0	0	0	0	0	0	0	0	0	0	0.00176357	0	0	0	0	0	0	0
844	UniRef100_C9SG69	1	Peptidyl-prolyl cis-trans isomerase B	Verticillium albo-atrum VaMs.102	0	0	0	0	0	0	0	0	0	0	0.00289123	0	0	0	0	0	0	0
845	UniRef100_C6RLI2	1	Acriflavine resistance protein E	Acinetobacter radioresistens	0	0	0	0	0	0	0.0010179	0	0	0	0	0	0	0	0	0	0	0
846	UniRef100_C6RQ42	2	Rickettsia 17 kDa surface antigen family protein	Acinetobacter radioresistens SK82	0	0	0	0	0	0	0.00353273	0	0	0	0	0	0	0	0	0	0	0
847	UniRef100_UPI000023CFAF	6	VATB_NEUCR Vacuolar ATP synthase subunit B (V-ATPase B subunit) (Vacuolar proton pump B subunit) (V-ATPase 57 kDa subunit)	Gibberella zeae PH-1	0.0009821	0	0	0	0	0	0	0	0	0	0	0	0	0	0	0	0	0
848	UniRef100_B6V3C1	3	Hexokinase 2	Cucumis melo	0	0.00101999	0	0	0	0	0	0	0	0	0	0	0	0	0	0	0	0
849	UniRef100_A0DIF7	2	Chromosome undetermined scaffold_51, whole genome shotgun sequence	Paramecium tetraurelia	0	0	0	0	0	0	0	0	0	0	0	0	0	0.00273899	0	0	0	0
850	UniRef100_A0SXL6	40	Elongation factor 2	Callithrix jacchus	0	0	0	0	0	0	0	0	0	0	0	0	0	0.000515351	0	0	0	0
851	UniRef100_A4R2S1	1	Putative uncharacterized protein	Magnaporthe grisea	0	0	0	0	0	0	0	0	0	0	0	0	0	0.00295811	0	0	0	0
852	UniRef100_A8PB71	1	Putative uncharacterized protein	Coprinopsis cinerea okayama7#130	0	0	0	0	0	0	0	0	0	0	0	0	0	0.00128242	0	0	0	0
853	UniRef100_B0CPN8	1	Predicted protein	Laccaria bicolor S238N-H82	0	0	0	0	0	0	0	0	0	0	0	0	0	0.00308137	0	0	0	0
854	UniRef100_Q2U7A3	1	Actin	Aspergillus oryzae	0	0	0	0	0	0	0	0	0	0	0	0	0	0.00118325	0	0	0	0
855	UniRef100_Q5KIC5	1	Ribosomal protein L18	Filobasidiella neoformans	0	0	0	0	0	0	0	0	0	0	0	0	0	0.00233535	0	0	0	0
856	UniRef100_Q9BJD3	1	Major plasmodial myosin heavy chain	Physarum polycephalum	0	0	0	0	0	0	0	0	0	0	0	0	0	0.000206572	0	0	0	0
857	UniRef100_A0BPS6	1	Chromosome undetermined scaffold_12, whole genome shotgun sequence	Paramecium tetraurelia	0	0	0	0	0	0	0	0	0	0	0	0	0	0	0	0.00211906	0	0
858	UniRef100_A4A5W4	1	Outer membrane efflux protein	Congregibacter litoralis KT71	0	0	0	0	0	0	0	0	0	0	0	0	0	0	0	0.000673306	0	0
859	UniRef100_B4DE59	1	cDNA FLJ60424, highly similar to Junction plakoglobin	Homo sapiens	0	0	0	0	0	0	0	0	0	0	0	0	0	0	0	0.00061351	0	0
860	UniRef100_Q24SY1	1	Putative phosphoenolpyruvate synthase	Desulfitobacterium hafniense Y51	0	0	0	0	0	0	0	0	0	0	0	0	0	0	0	0.00060811	0	0
861	UniRef100_A6SBW4	2	Putative uncharacterized protein	Botryotinia fuckeliana B05.10	0	0	0	0.000832507	0	0	0	0	0	0	0	0	0	0	0	0	0	0
862	UniRef100_A9T844	6	Predicted protein	Physcomitrella patens subsp. patens	0	0	0	0.000593034	0	0	0	0	0	0	0	0	0	0	0	0	0	0
863	UniRef100_A1BQJ2	1	Aspartic proteinase (Fragment)	Cucumis sativus	0	0	0	0	0	0	0	0	0	0	0	0	0	0.00226386	0	0	0	0
864	UniRef100_A5G1G2	1	60 kDa chaperonin	Acidiphilium cryptum JF-5	0	0	0	0	0	0	0	0	0	0	0	0	0	0.000808228	0	0	0	0
865	UniRef100_A6S3D3	2	Putative uncharacterized protein	Botryotinia fuckeliana B05.10	0	0	0	0	0	0	0	0	0	0	0	0	0	0.000632977	0	0	0	0
866	UniRef100_A8N212	1	6-phosphogluconate dehydrogenase, decarboxylating	Coprinopsis cinerea okayama7#130	0	0	0	0	0	0	0	0	0	0	0	0	0	0.000903701	0	0	0	0
867	UniRef100_A8N3X1	3	Putative uncharacterized protein	Coprinopsis cinerea okayama7#130	0	0	0	0	0	0	0	0	0	0	0	0	0	0.000905545	0	0	0	0
868	UniRef100_B0CNH9	1	Enolase	Laccaria bicolor S238N-H82	0	0	0	0	0	0	0	0	0	0	0	0	0	0.000999363	0	0	0	0
869	UniRef100_B9TE04	2	Aldehyde dehydrogenase, putative	Ricinus communis	0	0	0	0	0	0	0	0	0	0	0	0	0	0.000873459	0	0	0	0
870	UniRef100_O03986	7	Heat shock protein	Arabidopsis thaliana	0	0	0	0	0	0	0	0	0	0	0	0	0	0.000634788	0	0	0	0
871	UniRef100_Q08291	2	Geranyltranstransferase	Geobacillus stearothermophilus	0	0	0	0	0	0	0	0	0	0	0	0	0	0.00139096	0	0	0	0
872	UniRef100_Q7Z948	2	Xylanase	Volvariella volvacea	0	0	0	0	0	0	0	0	0	0	0	0	0	0.00120904	0	0	0	0
873	UniRef100_UPI000187EB8E		hypothetical protein MPER_15891	Moniliophthora perniciosa FA553	0	0	0	0	0	0	0	0	0	0	0	0	0	0.00242468	0	0	0	0
874	UniRef100_A0ZNJ6	13	Alpha-Arabinosidase1	Pyrus communis	0	0	0	0	0	0	0	0	0	0	0	0	0	0.00065445	0	0	0	0
875	UniRef100_B0CSS9	1	Predicted protein	Laccaria bicolor S238N-H82	0	0	0	0	0	0	0	0	0	0	0	0	0	0.00177487	0	0	0	0
876	UniRef100_B0DAX7	1	Predicted protein	Laccaria bicolor S238N-H82	0	0	0	0	0	0	0	0	0	0	0	0	0	0.00150924	0	0	0	0
877	UniRef100_Q2BJ78	1	Sensor protein	Neptuniibacter caesariensis	0	0	0	0	0	0	0	0	0	0	0	0	0	0.000337684	0	0	0	0
878	UniRef100_A3N317	59	50S ribosomal protein L1	Actinobacillus pleuropneumoniae	0	0	0	0	0	0	0.00178891	0	0	0	0	0	0	0	0	0	0	0
879	UniRef100_A3RXR6	15	SSU ribosomal protein S2P	Ralstonia solanacearum	0	0	0	0	0	0	0.00169514	0	0	0	0	0	0	0	0	0	0	0
880	UniRef100_A5AX39	14	Putative uncharacterized protein	Vitis vinifera	0	0	0	0	0	0	0.000919901	0	0	0	0	0	0	0	0	0	0	0
881	UniRef100_P11402	2	ATP synthase delta chain, chloroplastic	Spinacia oleracea	0	0	0	0	0	0	0.00163578	0	0	0	0	0	0	0	0	0	0	0
882	UniRef100_O94753	4	Versatile peroxidase VPL2	Pleurotus eryngii	0	0	0	0	0	0	0	0	0	0	0	0	0	0.00122913	0	0	0	0

## Sheet: Functional assignment
Supplementary Table S1. Fucntional classification of assigned protein clusters
For functional annotation, proteins were blasted against the Clusters of Orthologous Groups of proteins (COG) datadase (http://www.ncbi.nlm.nih.gov/COG/) and Swissprot (http://web.expasy.org/groups/swissprot/)
Light grey shaede columns show COG/KOG classification, dark grey shaded columns show Swissprot protein hits.
					COG/KOG classification		Swissprot annotation
#	Leading accession number	Proteins in cluster	Identified Proteins	Representative source organism	Protein annotation	COG/KOG category	Accession number	Protein annotation
1	UniRef100_Q29V96	2	ATP synthase subunit beta (Fragment)	Fagus grandifolia	F0F1-type ATP synthase, beta subunit	C	sp|Q09G39|ATPB_PLAOC	ATP synthase subunit beta, chloroplastic OS...
2	UniRef100_Q3U452	1	ATP synthase subunit alpha	Mus musculus	F0F1-type ATP synthase, alpha subunit	C	sp|Q06735|ATPAM_BETVU	ATP synthase subunit alpha, mitochondrial
3	UniRef100_C5XGT6	2	ATP synthase subunit beta	Sorghum bicolor	F0F1-type ATP synthase, beta subunit	C	sp|P17614|ATPBM_NICPL	ATP synthase subunit beta, mitochondrial O...
4	UniRef100_A5PFH1	14	Ribulose bisphosphate carboxylase large chain (Fragment)	Brenierea insignis			sp|A4GG89|RBL_PHAVU	Ribulose bisphosphate carboxylase large chai...
5	UniRef100_B2A947	1	ATP synthase subunit alpha	Podospora anserina	F0F1-type ATP synthase, alpha subunit	C	sp|P37211|ATPA_NEUCR	ATP synthase subunit alpha, mitochondrial O...
6	UniRef100_A1CM60	12	Actin	Aspergillus clavatus	Actin and related proteins	Z	sp|P78711|ACT_NEUCR	Actin OS=Neurospora crassa GN=act-1 PE=3 SV=2
7	UniRef100_Q0U1E5	1	Putative uncharacterized protein	Phaeosphaeria nodorum	Molecular chaperones HSP70/HSC70, HSP70 superfamily	O	sp|P87047|HSP71_PARBA	Heat shock 70 kDa protein 1 OS=Paracoccidi...
8	UniRef100_Q06Z74	1	Fibrillin 4	Coffea canephora			sp|Q9LW57|PAP6_ARATH	Probable plastid-lipid-associated protein
9	UniRef100_B7T325	1	ATP synthase subunit alpha	Geranium carolinianum	F0F1-type ATP synthase, alpha subunit	C	sp|Q2L8Z1|ATPA_GOSHI	ATP synthase subunit alpha, chloroplastic O...
10	UniRef100_O48657	1	Chlorophyll a/b-binding protein	Fagus crenata			sp|P07370|CB2B_SOLLC	Chlorophyll a-b binding protein 1B, chlorop...
11	UniRef100_A6R9F3	4	ATP synthase subunit beta	Ajellomyces capsulatus NAm1	F0F1-type ATP synthase, beta subunit	C	sp|P00830|ATPB_YEAST	ATP synthase subunit beta, mitochondrial OS...
12	UniRef100_B6HAB7	5	Histone H4	Penicillium chrysogenum Wisconsin 54-1255	Histone H4	B	sp|Q7LKT3|H4_ASPFU	Histone H4 OS=Aspergillus fumigatus GN=hhfA P...
13	UniRef100_B2VRU6	1	Elongation factor 1-alpha	Pyrenophora tritici-repentis Pt-1C-BFP	Translation elongation factor EF-1 alpha/Tu	J	sp|P41752|EF1A_ASHGO	Elongation factor 1-alpha OS=Ashbya gossypi...
14	UniRef100_O98447	4	ClpC protease	Spinacia oleracea	Chaperone HSP104 and related ATP-dependent Clp proteases	O	sp|P31542|CLPAB_SOLLC	ATP-dependent Clp protease ATP-binding sub...
15	UniRef100_A9PFI8	1	Predicted protein	Populus trichocarpa	Glycolate oxidase	C	sp|Q9LRR9|GOX2_ARATH	Probable peroxisomal (S)-2-hydroxy-acid oxi...
16	UniRef100_D1HAI0	2	Whole genome shotgun sequence of line PN40024, scaffold_72.assembly12x (Fragment)	Vitis vinifera	Serine protease	O	sp|O22609|DEGP1_ARATH	Protease Do-like 1, chloroplastic OS=Arabi...
17	UniRef100_P25856	1	Glyceraldehyde-3-phosphate dehydrogenase A, chloroplastic	Arabidopsis thaliana	Glyceraldehyde 3-phosphate dehydrogenase	G	sp|P19866|G3PA_SPIOL	Glyceraldehyde-3-phosphate dehydrogenase A,...
18	UniRef100_B2AZV9	1	Malate dehydrogenase	Podospora anserina	NAD-dependent malate dehydrogenase	C	sp|P17505|MDHM_YEAST	Malate dehydrogenase, mitochondrial OS=Sacc...
19	UniRef100_A9PGW0	4	Fructose-bisphosphate aldolase	Populus trichocarpa	Fructose-biphosphate aldolase	G	sp|Q01516|ALFC1_PEA	Fructose-bisphosphate aldolase 1, chloroplas...
20	UniRef100_P49317	1	Catalase isozyme 3	Nicotiana plumbaginifolia	Catalase	P	sp|P17598|CATA1_GOSHI	Catalase isozyme 1 OS=Gossypium hirsutum G...
21	UniRef100_A0ZZ15	69	Photosystem Q(B) protein	Gossypium barbadense			sp|Q09G66|PSBA_PLAOC	Photosystem Q(B) protein OS=Platanus occide...
22	UniRef100_B5G500	3	GLP2	Gossypium barbadense			sp|O04011|ABP20_PRUPE	Auxin-binding protein ABP20 OS=Prunus pers...
23	UniRef100_C6SVE5	1	Proteasome subunit beta type	Glycine max	20S proteasome, regulatory subunit beta type PSMB6/PSMB9/PRE3	O	sp|Q8LD27|PSB6_ARATH	Proteasome subunit beta type-6 OS=Arabidops...
24	UniRef100_B2VRS5	3	40S ribosomal protein S3-2	Pyrenophora tritici-repentis Pt-1C-BFP	40S ribosomal protein S3	J	sp|O60128|RS3_SCHPO	40S ribosomal protein S3 OS=Schizosaccharomy...
25	UniRef100_A6QWM4	24	Tubulin beta chain	Ajellomyces capsulatus NAm1	Beta tubulin	Z	sp|P53373|TBB_BOTFU	Tubulin beta chain OS=Botryotinia fuckeliana...
26	UniRef100_A6RJ45	1	ATP-dependent RNA helicase eIF4A	Botryotinia fuckeliana B05.10	Translation initiation factor 4F, helicase subunit (eIF-4A) and related helicases	J	sp|A4QVP2|IF4A_MAGGR	ATP-dependent RNA helicase eIF4A OS=Magnapo...
27	UniRef100_C7YN88	2	Predicted protein	Nectria haematococca mpVI 77-13-4	Ribosomal protein S4	J	sp|P52810|RS9_PODAN	40S ribosomal protein S9 OS=Podospora anseri...
28	UniRef100_C7Z1Y0	1	Predicted protein	Nectria haematococca mpVI 77-13-4	Molecular chaperone (HSP90 family)	O	sp|A2YWQ1|HSP81_ORYSI	Heat shock protein 81-1 OS=Oryza sativa su...
29	UniRef100_A6SDQ0	14	Histone H2B	Botryotinia fuckeliana B05.10	Histone H2B	B	sp|Q2HH38|H2B_CHAGB	Histone H2B OS=Chaetomium globosum GN=HTB1 P...
30	UniRef100_B9RZ18	1	Putative uncharacterized protein	Ricinus communis	Predicted oxidoreductase	R	sp|Q9FVR6|Y1222_ARATH	Uncharacterized protein At1g32220, chlorop...
31	UniRef100_A0A365	28	Cytochrome b6	eudicotyledons	Cytochrome b	C	sp|Q4VZI6|CYB6_CUCSA	Cytochrome b6 OS=Cucumis sativus GN=petB PE...
32	UniRef100_A5BYV7	30	Putative uncharacterized protein	Vitis vinifera	Vacuolar H+-ATPase V1 sector, subunit A	C	sp|P09469|VATA_DAUCA	V-type proton ATPase catalytic subunit A OS...
33	UniRef100_D0F1P7	2	Aspartic proteinase 1	Castanea mollissima	Aspartyl protease	O	sp|P42211|ASPRX_ORYSJ	Aspartic proteinase OS=Oryza sativa subsp....
34	UniRef100_Q0G9X7	1	ATP synthase subunit alpha, chloroplastic	Daucus carota	F0F1-type ATP synthase, alpha subunit	C	sp|Q0G9X7|ATPA_DAUCA	ATP synthase subunit alpha, chloroplastic O...
35	UniRef100_B2W2Q2	3	Glyceraldehyde-3-phosphate dehydrogenase	Pyrenophora tritici-repentis Pt-1C-BFP	Glyceraldehyde 3-phosphate dehydrogenase	G	sp|P54118|G3P_NEUCR	Glyceraldehyde 3-phosphate-dehydrogenase OS=...
36	UniRef100_C7IWD0	1	Os01g0791600 protein	Oryza sativa Japonica Group			sp|P0C511|RBL_ORYSI	Ribulose bisphosphate carboxylase large chai...
37	UniRef100_A9PEL1	2	2-cys peroxiredoxin	Populus trichocarpa	Alkyl hydroperoxide reductase, thiol specific antioxidant and related enzymes	O	sp|Q96468|BAS1_HORVU	2-Cys peroxiredoxin BAS1, chloroplastic (Fr...
38	UniRef100_A9PIG1	1	Putative uncharacterized protein	Populus trichocarpa			sp|Q02060|PSBS_SPIOL	Photosystem II 22 kDa protein, chloroplasti...
39	UniRef100_A6RNS7	2	ADP/ATP carrier protein	Botryotinia fuckeliana B05.10	Mitochondrial ADP/ATP carrier proteins	C	sp|P49382|ADT_KLULA	ADP,ATP carrier protein OS=Kluyveromyces lac...
40	UniRef100_C6TGD9	1	Putative uncharacterized protein	Glycine max	NAD-dependent malate dehydrogenase	C	sp|P83373|MDHM_FRAAN	Malate dehydrogenase, mitochondrial OS=Frag...
41	UniRef100_A5AS18	2	Whole genome shotgun sequence of line PN40024, scaffold_14.assembly12x	Vitis vinifera	1,4-benzoquinone reductase-like; Trp repressor binding protein-like/protoplast-secreted protein	R	sp|C4XGC2|WRBA_DESMR	Flavoprotein wrbA OS=Desulfovibrio magnetic...
42	UniRef100_Q0UYY5	1	Putative uncharacterized protein	Phaeosphaeria nodorum	Glucose dehydrogenase/choline dehydrogenase/mandelonitrile lyase (GMC oxidoreductase family)	R	sp|Q00922|ALOX_CANBO	Alcohol oxidase OS=Candida boidinii GN=AOD1...
43	UniRef100_A5B8T3	10	Putative uncharacterized protein	Vitis vinifera	Ribokinase	G	sp|Q7XJ81|SCRK2_SOLHA	Fructokinase-2 OS=Solanum habrochaites GN=...
44	UniRef100_A1CTD1	11	6-phosphogluconate dehydrogenase, decarboxylating	Aspergillus clavatus	6-phosphogluconate dehydrogenase	G	sp|O13287|6PGD_CANAL	6-phosphogluconate dehydrogenase, decarboxy...
45	UniRef100_Q70CE9	1	Glucan endo-1,3-beta-glucosidase (Beta 1-3 glucanase) (Fragment)	Fagus sylvatica			sp|P52407|E13B_HEVBR	Glucan endo-1,3-beta-glucosidase, basic vac...
46	UniRef100_UPI00017F0A65		PREDICTED: similar to histone cluster 1, H2ag	Sus scrofa	Histone 2A	B	sp|P0C0S8|H2A1_HUMAN	Histone H2A type 1 OS=Homo sapiens GN=HIST1...
47	UniRef100_Q7S9Y8	1	Adenosylhomocysteinase	Neurospora crassa	S-adenosylhomocysteine hydrolase	H	sp|P39954|SAHH_YEAST	Adenosylhomocysteinase OS=Saccharomyces cer...
48	UniRef100_Q71E52	1	Cytochrome f (Fragment)	Fagus sylvatica			sp|Q0ZJ07|CYF_VITVI	Apocytochrome f OS=Vitis vinifera GN=petA PE...
49	UniRef100_B9RVQ5	2	9-cis-epoxycarotenoid dioxygenase, putative	Ricinus communis	Beta, beta-carotene 15,15'-dioxygenase and related enzymes	Q	sp|Q84KG5|CCD_CROSA	Carotenoid cleavage dioxygenase OS=Crocus sa...
50	UniRef100_Q3SA43	1	Putative beta-1,3-glucanase (Fragment)	Fagus sylvatica			sp|P52408|E13B_PRUPE	Glucan endo-1,3-beta-glucosidase, basic iso...
51	UniRef100_Q9AXQ2	1	Mitochondrial processing peptidase beta subunit	Cucumis melo	Mitochondrial processing peptidase, beta subunit, and related enzymes (insulinase superfamily)	O	sp|Q03346|MPPB_RAT	Mitochondrial-processing peptidase subunit be...
52	UniRef100_A0A331	61	Photosystem II CP43 chlorophyll apoprotein	Coffea arabica			sp|Q332Y2|PSBC_LACSA	Photosystem II CP43 chlorophyll apoprotein
53	UniRef100_P11221	2	Major outer membrane lipoprotein	Pseudomonas aeruginosa	no hits found
54	UniRef100_A6S509	1	ATP synthase subunit alpha	Botryotinia fuckeliana B05.10	F0F1-type ATP synthase, alpha subunit	C	sp|P49375|ATPA_KLULA	ATP synthase subunit alpha, mitochondrial O...
55	UniRef100_A4RHZ5	6	Putative uncharacterized protein	Magnaporthe grisea	Plasma membrane H+-transporting ATPase	P	sp|P49380|PMA1_KLULA	Plasma membrane ATPase OS=Kluyveromyces lac...
56	UniRef100_Q2VJ43	1	Ubiquitin monomer protein (Fragment)	Morus mongolica	Ubiquitin and ubiquitin-like proteins	OR	sp|P69326|UBIQ_WHEAT	Ubiquitin OS=Triticum aestivum PE=3 SV=1
57	UniRef100_Q06Z73	1	Fibrillin 8	Coffea canephora	no hits found		sp|Q8W4F1|PAP10_ARATH	Probable plastid-lipid-associated protein
58	UniRef100_B9HF65	2	Predicted protein	Populus trichocarpa	no hits found		sp|Q8GXR9|DHNA_ARATH	Probable NADH dehydrogenase, chloroplastic/...
59	UniRef100_A1CNV5	6	40S ribosomal protein S5, putative	Aspergillus clavatus	Ribosomal protein S7	J	sp|Q7RVI1|RS5_NEUCR	40S ribosomal protein S5 OS=Neurospora crass...
60	UniRef100_C7YIZ8	1	Predicted protein	Nectria haematococca mpVI 77-13-4	Aldehyde dehydrogenase	C	sp|P42041|ALDH_ALTAL	Aldehyde dehydrogenase OS=Alternaria altern...
61	UniRef100_C7Z9T2	2	Predicted protein	Nectria haematococca mpVI 77-13-4	40S ribosomal protein S14	J	sp|P19115|RS14_NEUCR	40S ribosomal protein S14 OS=Neurospora cra...
62	UniRef100_P42056	1	Mitochondrial outer membrane protein porin of 36 kDa	Solanum tuberosum	Porin/voltage-dependent anion-selective channel protein	P	sp|P42055|VDAC1_SOLTU	Mitochondrial outer membrane protein porin...
63	UniRef100_Q8M9Q5	1	Photosystem II CP47 chlorophyll apoprotein (Fragment)	Fagus grandifolia			sp|P06411|PSBB_TOBAC	Photosystem II CP47 chlorophyll apoprotein
64	UniRef100_A1KXJ7	19	Oil palm polygalacturonase allergen PEST472	Elaeis guineensis	Cysteine proteinase Cathepsin L	O	sp|P43297|RD21A_ARATH	Cysteine proteinase RD21a OS=Arabidopsis t...
65	UniRef100_C6RNU7	2	Conidiation-specific protein 10	Acinetobacter radioresistens SK82	no hits found
66	UniRef100_A9PI96	1	Ferritin	Populus trichocarpa	Ferritin	P	sp|P19976|FRI1_SOYBN	Ferritin-1, chloroplastic OS=Glycine max PE...
67	UniRef100_Q48JY8	1	OprF	Pseudomonas syringae pv. phaseolicola 1448A	Outer membrane protein and related peptidoglycan-associated (lipo)proteins	M	sp|P13794|PORF_PSEAE	Outer membrane porin F OS=Pseudomonas aerug...
68	UniRef100_B7FK01	1	Putative uncharacterized protein	Medicago truncatula	Glyceraldehyde 3-phosphate dehydrogenase	G	sp|P25861|G3PC_ANTMA	Glyceraldehyde-3-phosphate dehydrogenase, c...
69	UniRef100_B2W2I0	3	Citrate synthase	Pyrenophora tritici-repentis Pt-1C-BFP	Citrate synthase	C	sp|O00098|CISY_EMENI	Citrate synthase, mitochondrial OS=Emericel...
70	UniRef100_Q676X3	1	2-cys peroxiredoxin-like protein (Fragment)	Hyacinthus orientalis	Alkyl hydroperoxide reductase, thiol specific antioxidant and related enzymes	O	sp|Q96468|BAS1_HORVU	2-Cys peroxiredoxin BAS1, chloroplastic (Fr...
71	UniRef100_B9RZ33	1	Phosphoribulokinase	Ricinus communis	Armadillo/beta-Catenin/plakoglobin	TZ	sp|P19824|KPPR_CHLRE	Phosphoribulokinase, chloroplastic OS=Chlam...
72	UniRef100_O78327	1	Transketolase 1	Capsicum annuum	Transketolase	G	sp|Q43848|TKTC_SOLTU	Transketolase, chloroplastic OS=Solanum tub...
73	UniRef100_A0A334	84	Photosystem I P700 chlorophyll a apoprotein A2	Coffea arabica			sp|A6MM35|PSAB_BUXMI	Photosystem I P700 chlorophyll a apoprotein...
74	UniRef100_A1EGU2	8	Hydroxypyruvate reductase	Solenostemon scutellarioides	Glyoxylate/hydroxypyruvate reductase (D-isomer-specific 2-hydroxy acid dehydrogenase superfamily)	C	sp|P13443|DHGY_CUCSA	Glycerate dehydrogenase OS=Cucumis sativus
75	UniRef100_Q02060	1	Photosystem II 22 kDa protein, chloroplastic	Spinacia oleracea			sp|Q02060|PSBS_SPIOL	Photosystem II 22 kDa protein, chloroplasti...
76	UniRef100_O24601	2	Glycine-rich RNA binding protein 1	Pelargonium x hortorum	FOG: RRM domain	R	sp|P49310|GRP1_SINAL	Glycine-rich RNA-binding protein GRP1A OS=S...
77	UniRef100_P34794	2	RuBisCO large subunit-binding protein subunit alpha, chloroplastic	Brassica napus	Mitochondrial chaperonin, Cpn60/Hsp60p	O	sp|P21238|RUBA_ARATH	RuBisCO large subunit-binding protein subun...
78	UniRef100_Q2G3K4	1	OmpA/MotB	Novosphingobium aromaticivorans DSM 12444	no hits found
79	UniRef100_A9L981	1	ATP synthase subunit alpha, chloroplastic	Lemna minor	F0F1-type ATP synthase, alpha subunit	C	sp|B1NWD5|ATPA_MANES	ATP synthase subunit alpha, chloroplastic O...
80	UniRef100_A7F5P3	2	Putative uncharacterized protein	Sclerotinia sclerotiorum 1980 UF-70	Multifunctional chaperone (14-3-3 family)	O	sp|Q99002|1433_TRIHA	14-3-3 protein homolog OS=Trichoderma harzi...
81	UniRef100_A1KXM7	19	FtsH-like protein	Solanum lycopersicum	AAA+-type ATPase containing the peptidase M41 domain	O	sp|O82150|FTSH_TOBAC	Cell division protease ftsH homolog, chloro...
82	UniRef100_C6RRC0	2	Entericidin EcnA/B family protein	Acinetobacter radioresistens SK82	no hits found
83	UniRef100_B6TMV9	2	Cysteine protease 1	Zea mays	Cysteine proteinase Cathepsin L	O	sp|P43297|RD21A_ARATH	Cysteine proteinase RD21a OS=Arabidopsis t...
84	UniRef100_A1TQL6	1	Putative uncharacterized protein	Acidovorax citrulli AAC00-1	no hits found
85	UniRef100_O49124	4	Putative serine-glyoxylate aminotransferase	Fritillaria agrestis	Alanine-glyoxylate aminotransferase AGT1	R	sp|O08374|SGAA_HYPME	Serine--glyoxylate aminotransferase OS=Hyph...
86	UniRef100_A2TJV6	17	Chloroplast HSP70	Cucumis sativus	Molecular chaperones mortalin/PBP74/GRP75, HSP70 superfamily	O	sp|P22358|DNAK2_SYNY3	Chaperone protein dnaK2 OS=Synechocystis s...
87	UniRef100_A6RIS9	5	Enolase	Botryotinia fuckeliana B05.10	Enolase	G	sp|Q7RV85|ENO_NEUCR	Enolase OS=Neurospora crassa GN=NCU10042 PE=...
88	UniRef100_O22077	2	Ribulose bisphosphate carboxylase small chain, chloroplastic	Fagus crenata			sp|O22077|RBS_FAGCR	Ribulose bisphosphate carboxylase small chai...
89	UniRef100_B9FLX9	9	Nucleoside diphosphate kinase	Oryza sativa Japonica Group	Nucleoside diphosphate kinase	F	sp|Q8LAH8|NDK4_ARATH	Nucleoside diphosphate kinase IV, chloropla...
90	UniRef100_B8AWT0	3	Putative uncharacterized protein	Oryza sativa Indica Group	Serine protease	O	sp|O22609|DEGP1_ARATH	Protease Do-like 1, chloroplastic OS=Arabi...
91	UniRef100_D1HJL7	1	Whole genome shotgun sequence of line PN40024, scaffold_68.assembly12x (Fragment)	Vitis vinifera
92	UniRef100_B2W5M4	1	Elongation factor 2	Pyrenophora tritici-repentis Pt-1C-BFP	Elongation factor 2	J	sp|O14460|EF2_SCHPO	Elongation factor 2 OS=Schizosaccharomyces p...
93	UniRef100_A1E9B0	46	Vacuolar H+-pyrophosphatase	Kalidium foliatum			sp|Q06572|AVP_HORVU	Pyrophosphate-energized vacuolar membrane pr...
94	UniRef100_C1G1F2	1	Elongation factor 1-alpha	Paracoccidioides brasiliensis	Translation elongation factor EF-1 alpha/Tu	J	sp|P40911|EF1A_AJECG	Elongation factor 1-alpha OS=Ajellomyces ca...
95	UniRef100_B9RE86	3	Protease, putative	Ricinus communis			sp|P73689|SPPA_SYNY3	Protease 4 homolog OS=Synechocystis sp. (st...
96	UniRef100_C4JM20	1	Nucleoside diphosphate kinase	Uncinocarpus reesii 1704	Nucleoside diphosphate kinase	F	sp|Q7Z8P9|NDK_ASPFU	Nucleoside diphosphate kinase OS=Aspergillus...
97	UniRef100_A9PAF2	1	Nucleoside diphosphate kinase	Populus trichocarpa	Nucleoside diphosphate kinase	F	sp|O81372|NDK1_MESCR	Nucleoside diphosphate kinase 1 OS=Mesembry...
98	UniRef100_B9SZT9	1	Fructose-bisphosphate aldolase	Ricinus communis	Fructose-biphosphate aldolase	G	sp|P16096|ALFC_SPIOL	Fructose-bisphosphate aldolase, chloroplast...
99	UniRef100_A7HKD8	1	Restriction modification system DNA specificity domain	Fervidobacterium nodosum Rt17-B1	Restriction endonuclease S subunits	V	sp|Q57594|T1S1_METJA	Type-1 restriction enzyme MjaXIP specificit...
100	UniRef100_A2YE72	27	Putative uncharacterized protein	Oryza sativa Indica Group	Vacuolar H+-ATPase V1 sector, subunit B	C	sp|Q9SZN1|VATB2_ARATH	V-type proton ATPase subunit B2 OS=Arabido...
101	UniRef100_B9GGJ1	9	Predicted protein (Fragment)	Populus trichocarpa			sp|Q9SVG4|RETOL_ARATH	Reticuline oxidase-like protein OS=Arabido...
102	UniRef100_P20115	2	Citrate synthase 4, mitochondrial	Arabidopsis thaliana	Citrate synthase	C	sp|P20115|CISY4_ARATH	Citrate synthase 4, mitochondrial OS=Arabi...
103	UniRef100_Q95FI2	1	ATP synthase subunit beta (Fragment)	Xyris sp. Chase 154	F0F1-type ATP synthase, beta subunit	C	sp|Q95DR6|ATPB_AGAAF	ATP synthase subunit beta, chloroplastic OS...
104	UniRef100_Q9GER1	1	ATP synthase subunit beta (Fragment)	Samolus repens	F0F1-type ATP synthase, beta subunit	C	sp|Q85V28|ATPB_HYAOR	ATP synthase subunit beta, chloroplastic OS...
105	UniRef100_A3KIS1	2	Putative peptidyl-prolyl cis-trans isomerase	Streptomyces ambofaciens ATCC 23877	Peptidyl-prolyl cis-trans isomerase (rotamase) - cyclophilin family	O	sp|Q9SKQ0|CP19B_ARATH	Peptidyl-prolyl cis-trans isomerase CYP19-...
106	UniRef100_C7ZD82	1	Predicted protein	Nectria haematococca mpVI 77-13-4	Glucose dehydrogenase/choline dehydrogenase/mandelonitrile lyase (GMC oxidoreductase family)	R	sp|Q00922|ALOX_CANBO	Alcohol oxidase OS=Candida boidinii GN=AOD1...
107	UniRef100_B9XPE7	1	ATP synthase F1, beta subunit	bacterium Ellin514	F0F1-type ATP synthase, beta subunit	C	sp|A8MJV9|ATPB_ALKOO	ATP synthase subunit beta OS=Alkaliphilus o...
108	UniRef100_Q1NB62	1	OmpA/MotB	Sphingomonas sp. SKA58	no hits found
109	UniRef100_B9HGN8	3	Predicted protein (Fragment)	Populus trichocarpa	Mitochondrial ADP/ATP carrier proteins	C	sp|P25083|ADT1_SOLTU	ADP,ATP carrier protein, mitochondrial OS=S...
110	UniRef100_B6HK84	1	Nucleoside diphosphate kinase	Penicillium chrysogenum Wisconsin 54-1255	Nucleoside diphosphate kinase	F	sp|Q7Z8P9|NDK_ASPFU	Nucleoside diphosphate kinase OS=Aspergillus...
111	UniRef100_A5A8K5	3	Subtilisin-like serine protease	Acremonium sp. F11177	Subtilisin-related protease/Vacuolar protease B	O	sp|P58371|SPM1_MAGGR	Subtilisin-like proteinase Spm1 OS=Magnapor...
112	UniRef100_A7EJZ9	2	Heat shock protein SSB	Sclerotinia sclerotiorum 1980 UF-70	Molecular chaperones HSP70/HSC70, HSP70 superfamily	O	sp|Q6CQ83|HSP75_KLULA	Heat shock protein SSB OS=Kluyveromyces la...
113	UniRef100_C5PH56	2	6-phosphogluconate dehydrogenase, decarboxylating	Coccidioides posadasii C735 delta SOWgp	6-phosphogluconate dehydrogenase	G	sp|O13287|6PGD_CANAL	6-phosphogluconate dehydrogenase, decarboxy...
114	UniRef100_C0J9K3	3	ATP synthase subunit beta (Fragment)	Chasmanthera welwitschii	F0F1-type ATP synthase, beta subunit	C	sp|Q95DR6|ATPB_AGAAF	ATP synthase subunit beta, chloroplastic OS...
115	UniRef100_A8D978	25	Histone H4 (Fragment)	Iberis amara	Histone H4	B	sp|P62787|H4_MAIZE	Histone H4 OS=Zea mays GN=H4C7 PE=1 SV=2
116	UniRef100_A7Y2G2	1	Germin-like protein	Chimonanthus praecox			sp|O04011|ABP20_PRUPE	Auxin-binding protein ABP20 OS=Prunus pers...
117	UniRef100_B9HJE0	17	Predicted protein	Populus trichocarpa	Phosphoglucomutase	G	sp|Q9SM60|PGMC_PEA	Phosphoglucomutase, cytoplasmic OS=Pisum sati...
118	UniRef100_B3N1J9	17	ATP synthase subunit beta	Drosophila ananassae	F0F1-type ATP synthase, beta subunit	C	sp|Q05825|ATPB_DROME	ATP synthase subunit beta, mitochondrial OS...
119	UniRef100_C3Z8M3	1	ATP synthase subunit beta	Branchiostoma floridae	F0F1-type ATP synthase, beta subunit	C	sp|Q05825|ATPB_DROME	ATP synthase subunit beta, mitochondrial OS...
120	UniRef100_B2WC39	1	ATP synthase subunit alpha	Pyrenophora tritici-repentis Pt-1C-BFP	F0F1-type ATP synthase, alpha subunit	C	sp|P19483|ATPA_BOVIN	ATP synthase subunit alpha, mitochondrial O...
121	UniRef100_Q94IA8	1	Transketolase	Persicaria tinctoria	Transketolase	G	sp|Q43848|TKTC_SOLTU	Transketolase, chloroplastic OS=Solanum tub...
122	UniRef100_A6S046	8	40S ribosomal protein S14	Botryotinia fuckeliana B05.10	40S ribosomal protein S14	J	sp|P19115|RS14_NEUCR	40S ribosomal protein S14 OS=Neurospora cra...
123	UniRef100_B2VS41	2	Acyl-CoA dehydrogenase family member 11	Pyrenophora tritici-repentis Pt-1C-BFP	Predicted acyl-CoA dehydrogenase	R	sp|Q6JQN1|ACD10_HUMAN	Acyl-CoA dehydrogenase family member 10 OS...
124	UniRef100_A8PRI2	1	Putative uncharacterized protein	Malassezia globosa CBS 7966	Molecular chaperones HSP70/HSC70, HSP70 superfamily	O	sp|Q10265|HSP71_SCHPO	Probable heat shock protein ssa1 OS=Schizo...
125	UniRef100_O81439	1	Probable plastid-lipid-associated protein 1, chloroplastic	Arabidopsis thaliana			sp|Q94KU6|PAP2_BRACM	Plastid lipid-associated protein 2, chlorop...
126	UniRef100_C5CY09	1	Porin	Variovorax paradoxus S110	no hits found		sp|P24305|OMP32_DELAC	Outer membrane porin protein 32 OS=Delftia...
127	UniRef100_A6XBI6	3	Plastid fibrillin 2 (Fragment)	Coffea canephora			sp|Q94KU5|PAP3_BRACM	Plastid lipid-associated protein 3, chlorop...
128	UniRef100_P40108	1	Aldehyde dehydrogenase	Davidiella tassiana	Aldehyde dehydrogenase	C	sp|P42041|ALDH_ALTAL	Aldehyde dehydrogenase OS=Alternaria altern...
129	UniRef100_Q89K42	1	Bll5076 protein	Bradyrhizobium japonicum	no hits found
130	UniRef100_A2RAS8	2	Contig An18c0150, complete genome	Aspergillus niger CBS 513.88	Mitochondrial ADP/ATP carrier proteins	C	sp|P12857|ADT2_MAIZE	ADP,ATP carrier protein 2, mitochondrial OS...
131	UniRef100_B9GJB2	2	Predicted protein (Fragment)	Populus trichocarpa	Prohibitin	O	sp|Q54GI9|PHB1_DICDI	Prohibitin-1, mitochondrial OS=Dictyosteliu...
132	UniRef100_C6TFH5	1	Superoxide dismutase [Cu-Zn]	Glycine max	Cu2+/Zn2+ superoxide dismutase SOD1	P	sp|P36214|SODCP_POPTM	Superoxide dismutase [Cu-Zn], chloroplasti...
133	UniRef100_A9NU00	10	Putative uncharacterized protein	Picea sitchensis	Fructose-1,6-bisphosphatase	G	sp|O20252|S17P_SPIOL	Sedoheptulose-1,7-bisphosphatase, chloropla...
134	UniRef100_A2WWL6	9	Malate dehydrogenase	Oryza sativa Indica Group	NAD-dependent malate dehydrogenase	C	sp|Q9SN86|MDHP_ARATH	Malate dehydrogenase, chloroplastic OS=Arab...
135	UniRef100_D1H5V7	1	Whole genome shotgun sequence of line PN40024, scaffold_4.assembly12x (Fragment)	Vitis vinifera	Mitochondrial chaperonin, Cpn60/Hsp60p	O	sp|Q43831|RUBB_SECCE	RuBisCO large subunit-binding protein subun...
136	UniRef100_D0ELH5	1	Cyclophilin	Citrus sinensis	Cyclophilin type peptidyl-prolyl cis-trans isomerase	O	sp|Q39613|CYPH_CATRO	Peptidyl-prolyl cis-trans isomerase OS=Cath...
137	UniRef100_A1CUJ5	11	Carboxypeptidase CpyA/Prc1, putative	Aspergillus clavatus	Serine carboxypeptidases (lysosomal cathepsin A)	OE	sp|P30574|CBPY_CANAL	Carboxypeptidase Y OS=Candida albicans GN=C...
138	UniRef100_B7FKU0	3	Putative uncharacterized protein	Medicago truncatula	Prohibitins and stomatins of the PID superfamily	C	sp|P16148|PLZ12_LUPPO	Protein PPLZ12 OS=Lupinus polyphyllus GN=P...
139	UniRef100_UPI00016E1D7E		UPI00016E1D7E related cluster	Takifugu rubripes	Translation initiation factor 4F, helicase subunit (eIF-4A) and related helicases	J	sp|Q8JFP1|IF4A2_CHICK	Eukaryotic initiation factor 4A-II OS=Gall...
140	UniRef100_B9SFR3	1	Putative uncharacterized protein	Ricinus communis
141	UniRef100_B9H6N6	3	Porin/voltage-dependent anion-selective channel protein	Populus trichocarpa	Porin/voltage-dependent anion-selective channel protein	P	sp|P42056|VDAC2_SOLTU	Mitochondrial outer membrane protein porin...
142	UniRef100_B9N9W6	4	Predicted protein	Populus trichocarpa	Molecular chaperones HSP70/HSC70, HSP70 superfamily	O	sp|P27322|HSP72_SOLLC	Heat shock cognate 70 kDa protein 2 OS=Sol...
143	UniRef100_A5BDU2	12	Putative uncharacterized protein	Vitis vinifera			sp|Q5IZC8|TC754_ARATH	Protein TOC75-4, chloroplastic OS=Arabidop...
144	UniRef100_B3NSA0	3	GG20235	Drosophila erecta	Ribulose kinase and related carbohydrate kinases	G	sp|Q4R4D5|GLPK2_MACFA	Glycerol kinase 2 OS=Macaca fascicularis G...
145	UniRef100_B9ICS6	2	Predicted protein	Populus trichocarpa	Beta-fructofuranosidase (invertase)	G	sp|P29001|INVA_PHAAU	Acid beta-fructofuranosidase OS=Phaseolus a...
146	UniRef100_A6RSQ7	2	Putative uncharacterized protein	Botryotinia fuckeliana B05.10	3-oxoacyl CoA thiolase	I	sp|P33291|THIKB_CANTR	3-ketoacyl-CoA thiolase B, peroxisomal OS=...
147	UniRef100_A4WG29	10	Thioredoxin	Enterobacter sp. 638	Thiol-disulfide isomerase and thioredoxins	OC	sp|P0AA28|THIO_SALTY	Thioredoxin-1 OS=Salmonella typhimurium GN=...
148	UniRef100_A4SBB9	31	Serine hydroxymethyltransferase	Ostreococcus lucimarinus CCE9901	Glycine/serine hydroxymethyltransferase	E	sp|P49357|GLYM_FLAPR	Serine hydroxymethyltransferase 1, mitochon...
149	UniRef100_B2W091	1	Aspartate aminotransferase	Pyrenophora tritici-repentis Pt-1C-BFP	Aspartate aminotransferase/Glutamic oxaloacetic transaminase AAT2/GOT1	E	sp|P00504|AATC_CHICK	Aspartate aminotransferase, cytoplasmic OS=...
150	UniRef100_Q0UU52	1	Putative uncharacterized protein	Phaeosphaeria nodorum	Fumarate reductase, flavoprotein subunit	C	sp|O13755|FRDS_SCHPO	Putative fumarate reductase OS=Schizosaccha...
151	UniRef100_B4FBF2	3	Putative uncharacterized protein	Zea mays	Serine carboxypeptidases (lysosomal cathepsin A)	OE	sp|P32826|SCP49_ARATH	Serine carboxypeptidase-like 49 OS=Arabido...
152	UniRef100_A0A075	49	H+-ATPase proteolipid	Acanthus ebracteatus	Vacuolar H+-ATPase V0 sector, subunits c/c'	C	sp|Q96473|VATL_KALDA	V-type proton ATPase 16 kDa proteolipid sub...
153	UniRef100_A9Z0V7	6	Carotenoid cleavage dioxygenase 1	Rosa x damascena	Beta, beta-carotene 15,15'-dioxygenase and related enzymes	Q	sp|Q8LP17|CCD1_PEA	Carotenoid cleavage dioxygenase 1 OS=Pisum sa...
154	UniRef100_A5AHP2	10	Putative uncharacterized protein	Vitis vinifera	Prohibitin-like protein	O	sp|Q54Q31|PHB2_DICDI	Prohibitin-2 OS=Dictyostelium discoideum GN...
155	UniRef100_A4QT34	22	Cell division control protein Cdc48	Magnaporthe grisea	AAA+-type ATPase	O	sp|P25694|CDC48_YEAST	Cell division control protein 48 OS=Saccha...
156	UniRef100_A5DAI9	2	Transaldolase	Pichia guilliermondii	Transaldolase	G	sp|P15019|TAL1_YEAST	Transaldolase OS=Saccharomyces cerevisiae G...
157	UniRef100_B2VT43	1	Woronin body major protein	Pyrenophora tritici-repentis Pt-1C-BFP	no hits found		sp|P87252|HEX1_NEUCR	Woronin body major protein OS=Neurospora cr...
158	UniRef100_Q7LHE2	2	Cyclophilin, cytosolic form	Tolypocladium inflatum	Cyclophilin type peptidyl-prolyl cis-trans isomerase	O	sp|P10255|CYPH_NEUCR	Peptidyl-prolyl cis-trans isomerase, mitoch...
159	UniRef100_A1D5E3	4	Pectate lyase, putative	Neosartorya fischeri NRRL 181	no hits found		sp|Q9X6Z2|PELA_PAEBA	Pectate lyase A OS=Paenibacillus barcinonen...
160	UniRef100_A5X2M7	3	60S ribosomal protein L12 (Fragment)	Stachybotrys elegans	40S ribosomal protein S2	J	sp|Q9C285|RL12_NEUCR	60S ribosomal protein L12 OS=Neurospora cra...
161	UniRef100_A9P967	1	Predicted protein	Populus trichocarpa	Mitochondrial oxoglutarate/malate carrier proteins	C	sp|P0C582|M2OM_NEUCR	Putative mitochondrial 2-oxoglutarate/malat...
162	UniRef100_C6TI22	2	Putative uncharacterized protein	Glycine max	Arginase family protein	E	sp|P46637|ARGI1_ARATH	Arginase OS=Arabidopsis thaliana GN=At4g08...
163	UniRef100_A9NPA6	2	Nucleoside diphosphate kinase	Picea sitchensis	Nucleoside diphosphate kinase	F	sp|Q02254|NDK1_SPIOL	Nucleoside diphosphate kinase 1 OS=Spinacia...
164	UniRef100_B6ZHC0	1	PR-5 protein	Glycine max			sp|P50700|OSL3_ARATH	Osmotin-like protein OSM34 OS=Arabidopsis t...
165	UniRef100_B8LQJ2	1	Putative uncharacterized protein	Picea sitchensis			sp|P33679|ZEAM_MAIZE	Zeamatin OS=Zea mays GN=Zlp PE=1 SV=2
166	UniRef100_B8LX15	2	Bifunctional catalase-peroxidase Cat2	Talaromyces stipitatus ATCC 10500	no hits found		sp|A2Q7T1|KATG_ASPNC	Catalase-peroxidase OS=Aspergillus niger (s...
167	UniRef100_UPI000023F1DE	1	hypothetical protein FG02461.1	Gibberella zeae PH-1	NAD-dependent malate dehydrogenase	C	sp|P17505|MDHM_YEAST	Malate dehydrogenase, mitochondrial OS=Sacc...
168	UniRef100_B8II78	1	Acid phosphatase (Class B)	Methylobacterium nodulans ORS 2060	no hits found
169	UniRef100_Q6EW22	1	Cytochrome b6	Nymphaea alba	Cytochrome b	C	sp|Q3BAK7|CYB6_PHAAO	Cytochrome b6 OS=Phalaenopsis aphrodite sub...
170	UniRef100_B9GKG1	1	Predicted protein (Fragment)	Populus trichocarpa			sp|P50700|OSL3_ARATH	Osmotin-like protein OSM34 OS=Arabidopsis t...
171	UniRef100_Q84LB8	1	Glycolate oxidase	Zantedeschia aethiopica	Glycolate oxidase	C	sp|Q9LRR9|GOX2_ARATH	Probable peroxisomal (S)-2-hydroxy-acid oxi...
172	UniRef100_C9SFN5	1	Formate dehydrogenase	Verticillium albo-atrum VaMs.102	Glyoxylate/hydroxypyruvate reductase (D-isomer-specific 2-hydroxy acid dehydrogenase superfamily)	C	sp|Q03134|FDH_EMENI	Probable formate dehydrogenase OS=Emericella...
173	UniRef100_C9SK65	2	Glyceraldehyde-3-phosphate dehydrogenase	Verticillium albo-atrum VaMs.102	Glyceraldehyde 3-phosphate dehydrogenase	G	sp|P54117|G3P_COLLN	Glyceraldehyde-3-phosphate dehydrogenase OS=...
174	UniRef100_C6RQL5	2	Putative uncharacterized protein	Acinetobacter radioresistens SK82	no hits found
175	UniRef100_A5AER7	7	Putative uncharacterized protein	Vitis vinifera	AAA+-type ATPase containing the peptidase M41 domain	O	sp|Q1PDW5|FTSH6_ARATH	Cell division protease ftsH homolog 6, chl...
176	UniRef100_Q2Z1Y2	1	Serine carboxypeptidase	Prunus mume	Serine carboxypeptidases (lysosomal cathepsin A)	OE	sp|P32826|SCP49_ARATH	Serine carboxypeptidase-like 49 OS=Arabido...
177	UniRef100_B6HGB8	1	Pc20g11840 protein	Penicillium chrysogenum Wisconsin 54-1255	no hits found
178	UniRef100_A9PHJ3	5	Putative uncharacterized protein	Populus trichocarpa	Serine carboxypeptidases	O	sp|Q67Y83|SCP51_ARATH	Serine carboxypeptidase-like 51 OS=Arabido...
179	UniRef100_A2YXH5	18	Putative uncharacterized protein	Oryza sativa Indica Group	Pyruvate dehydrogenase E1, beta subunit	C	sp|P52904|ODPB_PEA	Pyruvate dehydrogenase E1 component subunit b...
180	UniRef100_C8VMQ7	1	ATP synthase alpha chain, mitochondrial (Broad)	Aspergillus nidulans FGSC A4	F0F1-type ATP synthase, alpha subunit	C	sp|P37211|ATPA_NEUCR	ATP synthase subunit alpha, mitochondrial O...
181	UniRef100_C7YME4	1	Superoxide dismutase [Cu-Zn]	Nectria haematococca mpVI 77-13-4	Cu2+/Zn2+ superoxide dismutase SOD1	P	sp|Q96VL0|SODC_CLAPU	Superoxide dismutase [Cu-Zn] OS=Claviceps p...
182	UniRef100_B6CQT4	4	Putative allergen Pru du 2.01A	Prunus dulcis x Prunus persica			sp|Q9FSG7|TP1A_MALDO	Thaumatin-like protein 1a OS=Malus domestic...
183	UniRef100_A7EUG8	1	Malate dehydrogenase	Sclerotinia sclerotiorum 1980 UF-70	NAD-dependent malate dehydrogenase	C	sp|O02640|MDHM_CAEEL	Probable malate dehydrogenase, mitochondria...
184	UniRef100_Q19NJ4	1	60 kDa chaperonin 2	Enterobacteriaceae	Chaperonin GroEL (HSP60 family)	O	sp|Q8PPZ1|CH60_XANAC	60 kDa chaperonin OS=Xanthomonas axonopodis...
185	UniRef100_D1HFG4	1	Whole genome shotgun sequence of line PN40024, scaffold_1.assembly12x (Fragment)	Vitis vinifera			sp|Q9THX6|APX4_SOLLC	Putative L-ascorbate peroxidase, chloroplas...
186	UniRef100_Q8W3M4	1	Uncharacterized protein At4g06744	Arabidopsis thaliana			sp|Q8W3M4|Y4744_ARATH	Uncharacterized protein At4g06744 OS=Arabi...
187	UniRef100_Q8L5C8	1	Malate dehydrogenase	Solanum tuberosum	NAD-dependent malate dehydrogenase	C	sp|P83373|MDHM_FRAAN	Malate dehydrogenase, mitochondrial OS=Frag...
188	UniRef100_A4V8W3	1	Metallo-endopeptidase	Hypocrea lixii	no hits found		sp|P47189|PLNC_PENCI	Penicillolysin OS=Penicillium citrinum GN=p...
189	UniRef100_C3MJS6	3	Putative uncharacterized protein	Sulfolobus islandicus
190	UniRef100_C5P088	2	ATP synthase subunit alpha	Coccidioides posadasii C735 delta SOWgp	F0F1-type ATP synthase, alpha subunit	C	sp|P19483|ATPA_BOVIN	ATP synthase subunit alpha, mitochondrial O...
191	UniRef100_P30361	2	Cytochrome b6-f complex iron-sulfur subunit 1, chloroplastic	Nicotiana tabacum	Ubiquinol cytochrome c reductase, subunit RIP1	C	sp|Q02585|UCRIB_TOBAC	Cytochrome b6-f complex iron-sulfur subuni...
192	UniRef100_A6SCR5	7	Putative uncharacterized protein	Botryotinia fuckeliana B05.10	UDP-glucose pyrophosphorylase	G	sp|P32861|UGPA1_YEAST	UTP--glucose-1-phosphate uridylyltransfera...
193	UniRef100_Q6UNN8	1	Cobalamin-independent methionine synthase (Fragment)	Epichloe festucae	Methionine synthase II (cobalamin-independent)	E	sp|Q87BY8|METE_XYLFT	5-methyltetrahydropteroyltriglutamate--homo...
194	UniRef100_C8Q7W5	1	OmpA domain protein transmembrane region-containing protein	Pantoea sp. At-9b	Outer membrane protein and related peptidoglycan-associated (lipo)proteins	M	sp|P0A911|OMPA_ECO57	Outer membrane protein A OS=Escherichia col...
195	UniRef100_B9IMD7	10	Predicted protein	Populus trichocarpa	Predicted aminopeptidase of the M17 family	R	sp|Q6K669|AMPL2_ORYSJ	Leucine aminopeptidase 2, chloroplastic OS...
196	UniRef100_A3C9R5	4	Putative uncharacterized protein	Oryza sativa Japonica Group	Predicted unusual protein kinase	R	sp|P73121|Y1919_SYNY3	Uncharacterized protein slr1919 OS=Synecho...
197	UniRef100_C9NC88	2	Thermolysin	Streptomyces flavogriseus ATCC 33331	Zinc metalloprotease (elastase)	E	sp|Q59223|THER_BACSO	Thermolysin OS=Bacillus sp. (strain EA1) GN...
198	UniRef100_Q53I52	1	Glyceraldehyde-3-phosphate-dehydrogenase	Lupinus albus	Glyceraldehyde 3-phosphate dehydrogenase	G	sp|P34921|G3PC_DIACA	Glyceraldehyde-3-phosphate dehydrogenase, c...
199	UniRef100_B5KUF5	4	Glyceraldehyde-3-phosphate dehydrogenase (Fragment)	Helianthus annuus	Glyceraldehyde 3-phosphate dehydrogenase	G	sp|P19866|G3PA_SPIOL	Glyceraldehyde-3-phosphate dehydrogenase A,...
200	UniRef100_A9PIE8	2	Putative uncharacterized protein	Populus trichocarpa			sp|Q9M2P7|PAP9_ARATH	Probable plastid-lipid-associated protein
201	UniRef100_A0ARF5	17	Cytochrome b559 subunit alpha (Fragment)	Magnoliophyta			sp|P69383|PSBE_SPIOL	Cytochrome b559 subunit alpha OS=Spinacia o...
202	UniRef100_P46487	1	Malate dehydrogenase, mitochondrial	Eucalyptus gunnii	NAD-dependent malate dehydrogenase	C	sp|P17783|MDHM_CITLA	Malate dehydrogenase, mitochondrial OS=Citr...
203	UniRef100_A4RI79	7	Putative uncharacterized protein	Magnaporthe grisea	NADP-dependent isocitrate dehydrogenase	C	sp|P41939|IDHC_YEAST	Isocitrate dehydrogenase [NADP] cytoplasmic...
204	UniRef100_Q0CCF8	1	Putative uncharacterized protein	Aspergillus terreus NIH2624	no hits found		sp|Q9X6Z2|PELA_PAEBA	Pectate lyase A OS=Paenibacillus barcinonen...
205	UniRef100_A1DP75	9	Carboxypeptidase CpyA/Prc1, putative	Neosartorya fischeri NRRL 181	Serine carboxypeptidases (lysosomal cathepsin A)	OE	sp|P52710|CBPY_PICPG	Carboxypeptidase Y OS=Pichia pastoris (stra...
206	UniRef100_UPI0001985987		PREDICTED: hypothetical protein	Vitis vinifera
207	UniRef100_C5CPL8	1	Porin	Variovorax paradoxus S110	no hits found		sp|P24305|OMP32_DELAC	Outer membrane porin protein 32 OS=Delftia...
208	UniRef100_B4FLP0	3	Putative uncharacterized protein	Zea mays	Glyoxylate/hydroxypyruvate reductase (D-isomer-specific 2-hydroxy acid dehydrogenase superfamily)	C	sp|Q9C4M5|GYAR_THELI	Glyoxylate reductase OS=Thermococcus litora...
209	UniRef100_B9IA60	5	Predicted protein	Populus trichocarpa	Glycosyl hydrolase, family 38 - alpha-mannosidase	G	sp|Q60HE9|MA2B1_MACFA	Lysosomal alpha-mannosidase OS=Macaca fasc...
210	UniRef100_A1CT41	29	Cell wall integrity signaling protein Lsp1, putative	Aspergillus clavatus			sp|Q12230|LSP1_YEAST	Sphingolipid long chain base-responsive pro...
211	UniRef100_B2TV71	2	Glutaredoxin	Shigella boydii CDC 3083-94	Glutaredoxin and related proteins	O	sp|P68689|GLRX1_SHIFL	Glutaredoxin-1 OS=Shigella flexneri GN=grx...
212	UniRef100_Q0UAM1	1	Nucleoside diphosphate kinase	Phaeosphaeria nodorum	Nucleoside diphosphate kinase	F	sp|Q7Z8P9|NDK_ASPFU	Nucleoside diphosphate kinase OS=Aspergillus...
213	UniRef100_B6Q6K2	2	Mitochondrial ADP,ATP carrier protein (Ant), putative	Penicillium marneffei ATCC 18224	Mitochondrial ADP/ATP carrier proteins	C	sp|Q09188|ADT_SCHPO	ADP,ATP carrier protein OS=Schizosaccharomyc...
214	UniRef100_Q5KFU0	1	ATP synthase subunit beta	Filobasidiella neoformans	F0F1-type ATP synthase, beta subunit	C	sp|P00830|ATPB_YEAST	ATP synthase subunit beta, mitochondrial OS...
215	UniRef100_A5E3E0	1	Nucleoside diphosphate kinase	Lodderomyces elongisporus	Nucleoside diphosphate kinase	F	sp|Q75DD1|NDK_ASHGO	Nucleoside diphosphate kinase OS=Ashbya goss...
216	UniRef100_A8JIJ1	27	Subunit of exon junction complex	Chlamydomonas reinhardtii	ATP-dependent RNA helicase	A	sp|Q5JK84|RH15_ORYSJ	DEAD-box ATP-dependent RNA helicase 15 OS=O...
217	UniRef100_A6YNL9	36	Chitinase	Trichoderma viride	Chitinase	G	sp|P48827|CHI4_TRIHA	42 kDa endochitinase OS=Trichoderma harzian...
218	UniRef100_A2QPY3	1	Contig An08c0020, complete genome	Aspergillus niger CBS 513.88	60S ribosomal protein L9	J	sp|P51401|RL9B_YEAST	60S ribosomal protein L9-B OS=Saccharomyces...
219	UniRef100_A5ADV7	6	ATP-dependent Clp protease proteolytic subunit	Vitis vinifera	ATP-dependent Clp protease, proteolytic subunit	O	sp|Q9XJ36|CLPR2_ARATH	ATP-dependent Clp protease proteolytic sub...
220	UniRef100_A8BA83	1	Superoxide dismutase [Cu-Zn]	Hypocrea lixii	Cu2+/Zn2+ superoxide dismutase SOD1	P	sp|Q96VL0|SODC_CLAPU	Superoxide dismutase [Cu-Zn] OS=Claviceps p...
221	UniRef100_A4V8W2	3	Serin endopeptidase	Hypocrea lixii	Subtilisin-related protease/Vacuolar protease B	O	sp|P09232|PRTB_YEAST	Cerevisin OS=Saccharomyces cerevisiae GN=PR...
222	UniRef100_B6HC69	1	Pc18g05490 protein	Penicillium chrysogenum Wisconsin 54-1255	no hits found		sp|O59843|GUX1_ASPAC	Exoglucanase 1 OS=Aspergillus aculeatus GN=...
223	UniRef100_B5M1Y6	1	Alcohol dehydrogenase	Rheum australe	Aldehyde dehydrogenase	C	sp|Q9SU63|AL2B4_ARATH	Aldehyde dehydrogenase family 2 member B4,...
224	UniRef100_A9PI52	2	Putative uncharacterized protein	Populus trichocarpa	Serine protease	O	sp|O22609|DEGP1_ARATH	Protease Do-like 1, chloroplastic OS=Arabi...
225	UniRef100_A9PCR0	2	Malate dehydrogenase	Populus trichocarpa	NAD-dependent malate dehydrogenase	C	sp|P83373|MDHM_FRAAN	Malate dehydrogenase, mitochondrial OS=Frag...
226	UniRef100_UPI000194C4F6		PREDICTED: similar to carbamoylphosphate synthetase 2/aspartate transcarbamylase/dihydroorotase, partial	Taeniopygia guttata	Multifunctional pyrimidine synthesis protein CAD (includes carbamoyl-phophate synthetase, aspartate transcarbamylase, and glutamine amidotransferase)	R	sp|Q91437|PYR1_SQUAC	CAD protein OS=Squalus acanthias GN=CAD PE=...
227	UniRef100_D1ILD9	2	Whole genome shotgun sequence of line PN40024, scaffold_30.assembly12x (Fragment)	Vitis vinifera	Ribose 5-phosphate isomerase	G	sp|Q9ZU38|RPIA_ARATH	Probable ribose-5-phosphate isomerase OS=Ar...
228	UniRef100_A4W9R6	13	LPP repeat-containing protein	Enterobacter sp. 638	Murein lipoprotein	M	sp|Q7CQN4|LPP1_SALTY	Major outer membrane lipoprotein 1 OS=Salmo...
229	UniRef100_A2QMY6	8	Superoxide dismutase [Cu-Zn]	Aspergillus niger CBS 513.88	Cu2+/Zn2+ superoxide dismutase SOD1	P	sp|Q9Y8D9|SODC_ASPFU	Superoxide dismutase [Cu-Zn] OS=Aspergillus...
230	UniRef100_C7YTN8	2	Predicted protein	Nectria haematococca mpVI 77-13-4	Septin family protein (P-loop GTPase)	DZU	sp|P32468|CDC12_YEAST	Cell division control protein 12 OS=Saccha...
231	UniRef100_A9PIP9	6	Putative uncharacterized protein	Populus trichocarpa x Populus deltoides	Cysteine proteinase Cathepsin F	O	sp|P43295|A494_ARATH	Probable cysteine proteinase A494 OS=Arabid...
232	UniRef100_Q2H6T6	1	Malate dehydrogenase	Chaetomium globosum	NAD-dependent malate dehydrogenase	C	sp|Q5NVR2|MDHM_PONAB	Malate dehydrogenase, mitochondrial OS=Pong...
233	UniRef100_B1LWS4	1	Elongation factor Tu	Methylobacterium radiotolerans JCM 2831	GTPases - translation elongation factors	J	sp|Q134R0|EFTU2_RHOPS	Elongation factor Tu 2 OS=Rhodopseudomonas...
234	UniRef100_A6N5L8	10	Predicted ATPase terminase subunit	Pseudomonas aeruginosa			sp|P51718|VPP_BPHP1	Probable terminase, ATPase subunit OS=Haemop...
235	UniRef100_A1TSA1	15	OmpA/MotB domain protein	Acidovorax citrulli AAC00-1	Outer membrane protein and related peptidoglycan-associated (lipo)proteins	M	sp|Q05146|OMPA_BORAV	Outer membrane protein A OS=Bordetella aviu...
236	UniRef100_B4YYB3	12	ST103-2	Thellungiella halophila
237	UniRef100_A7IZK8	1	Vacuolar invertase	Coffea canephora	Beta-fructofuranosidase (invertase)	G	sp|P29001|INVA_PHAAU	Acid beta-fructofuranosidase OS=Phaseolus a...
238	UniRef100_Q7Z8P9	1	Nucleoside diphosphate kinase	Aspergillus fumigatus	Nucleoside diphosphate kinase	F	sp|Q7Z8P9|NDK_ASPFU	Nucleoside diphosphate kinase OS=Aspergillus...
239	UniRef100_A6RUE0	11	60S ribosomal protein L17	Botryotinia fuckeliana B05.10	60S ribosomal protein L22	J	sp|Q9HE25|RL17_NEUCR	60S ribosomal protein L17 OS=Neurospora cra...
240	UniRef100_Q7XB19	1	Ubiquitin/actin fusion protein (Fragment)	Gymnochlora stellata	Actin and related proteins	Z	sp|P17126|ACT_HYDAT	Actin, non-muscle 6.2 OS=Hydra attenuata PE=...
241	UniRef100_A4RCB4	4	Putative uncharacterized protein	Magnaporthe grisea	ATP sulfurylase (sulfate adenylyltransferase)	P	sp|Q0V6P9|MET3_PHANO	Sulfate adenylyltransferase OS=Phaeosphaeri...
242	UniRef100_B4FHM1	11	Putative uncharacterized protein	Zea mays	Cytochrome c1	C	sp|P25076|CY11_SOLTU	Cytochrome c1-1, heme protein, mitochondria...
243	UniRef100_B9T155	1	Thylakoid lumenal 25.6 kDa protein, chloroplast, putative	Ricinus communis			sp|P82538|PPL1_ARATH	PsbP-like protein 1, chloroplastic OS=Arabi...
244	UniRef100_A4U4D2	1	DNA-directed RNA polymerase	Magnetospirillum gryphiswaldense	DNA-directed RNA polymerase, beta' subunit/160 kD subunit	K	sp|A5FZX0|RPOC_ACICJ	DNA-directed RNA polymerase subunit beta' O...
245	UniRef100_B6H0D9	2	Pc12g06430 protein	Penicillium chrysogenum Wisconsin 54-1255	Alpha-amylase	G	sp|P0C1B3|AMYA1_ASPOR	Alpha-amylase A type-1/2 OS=Aspergillus or...
246	UniRef100_B8LFH7	3	Cyclophilin	Ipomoea batatas	Cyclophilin type peptidyl-prolyl cis-trans isomerase	O	sp|Q39613|CYPH_CATRO	Peptidyl-prolyl cis-trans isomerase OS=Cath...
247	UniRef100_A9PA01	10	Predicted protein	Populus trichocarpa			sp|Q6I544|GL52_ORYSJ	Germin-like protein 5-1 OS=Oryza sativa sub...
248	UniRef100_C6DJ47	1	Fimbrial protein	Pectobacterium carotovorum subsp. carotovorum PC1	no hits found
249	UniRef100_B9GF37	1	Predicted protein	Populus trichocarpa
250	UniRef100_A2QN66	3	Putative frameshift	Aspergillus niger CBS 513.88	no hits found		sp|Q9P8K9|HEX1_EMENI	Woronin body major protein OS=Emericella ni...
251	UniRef100_A7ELT7	1	Peptidyl-prolyl cis-trans isomerase	Sclerotinia sclerotiorum 1980 UF-70	Cyclophilin type peptidyl-prolyl cis-trans isomerase	O	sp|P10255|CYPH_NEUCR	Peptidyl-prolyl cis-trans isomerase, mitoch...
252	UniRef100_Q8RXI1	2	Putative chloroplast nucleoid DNA-binding protein	Arabidopsis thaliana	Aspartyl protease	O	sp|Q766C3|NEP1_NEPGR	Aspartic proteinase nepenthesin-1 OS=Nepent...
253	UniRef100_A3FMB9	30	Proteasome subunit alpha type	Zea mays	20S proteasome, regulatory subunit alpha type PSMA7/PRE6	O	sp|Q9SXU1|PSA7_CICAR	Proteasome subunit alpha type-7 OS=Cicer ar...
254	UniRef100_P48210	2	60 kDa chaperonin	Bordetella pertussis	Chaperonin GroEL (HSP60 family)	O	sp|P48210|CH60_BORPE	60 kDa chaperonin OS=Bordetella pertussis G...
255	UniRef100_Q2GUM4	1	Putative uncharacterized protein	Chaetomium globosum	no hits found		sp|Q7SA23|GUX1A_NEUCR	Exoglucanase 1 OS=Neurospora crassa GN=cbh...
256	UniRef100_C5FG71	1	Peroxisomal hydratase-dehydrogenase-epimerase	Microsporum canis CBS 113480	Peroxisomal multifunctional beta-oxidation protein and related enzymes	I	sp|Q01373|FOX2_NEUCR	Peroxisomal hydratase-dehydrogenase-epimera...
257	UniRef100_A9PH26	2	Putative uncharacterized protein	Populus trichocarpa			sp|P73689|SPPA_SYNY3	Protease 4 homolog OS=Synechocystis sp. (st...
258	UniRef100_C7BFZ4	1	Isoflavone reductase-like protein	Coffea arabica			sp|P52577|IFRH_ARATH	Isoflavone reductase homolog P3 OS=Arabidop...
259	UniRef100_B6GXL6	5	Pc12g04310 protein	Penicillium chrysogenum Wisconsin 54-1255	Glyoxylate/hydroxypyruvate reductase (D-isomer-specific 2-hydroxy acid dehydrogenase superfamily)	C	sp|Q07103|FDH_NEUCR	Formate dehydrogenase OS=Neurospora crassa G...
260	UniRef100_B9RHY4	1	Phosphoglycerate kinase	Ricinus communis	3-phosphoglycerate kinase	G	sp|P12782|PGKH_WHEAT	Phosphoglycerate kinase, chloroplastic OS=T...
261	UniRef100_UPI00016E81C7		UPI00016E81C7 related cluster	Takifugu rubripes	Plasma membrane glycoprotein CD36 and related membrane receptors	T	sp|Q8SQC1|SCRB1_PIG	Scavenger receptor class B member 1 OS=Sus s...
262	UniRef100_O48902	2	Malate dehydrogenase [NADP], chloroplastic	Medicago sativa	Malate dehydrogenase	C	sp|P17606|MDHP1_SORBI	Malate dehydrogenase [NADP] 1, chloroplast...
263	UniRef100_A9NKY2	4	Putative uncharacterized protein	Picea sitchensis	Multifunctional chaperone (14-3-3 family)	O	sp|Q9SP07|1433_LILLO	14-3-3-like protein OS=Lilium longiflorum P...
264	UniRef100_A4R592	2	Aspartate aminotransferase	Magnaporthe grisea	Aspartate aminotransferase/Glutamic oxaloacetic transaminase AAT2/GOT1	E	sp|P00503|AATC_PIG	Aspartate aminotransferase, cytoplasmic OS=Su...
265	UniRef100_UPI000023E582	1	hypothetical protein FG09739.1	Gibberella zeae PH-1	Aspartate aminotransferase/Glutamic oxaloacetic transaminase AAT2/GOT1	E	sp|P00503|AATC_PIG	Aspartate aminotransferase, cytoplasmic OS=Su...
266	UniRef100_B6HCW6	1	Mitochondrial ADP/ATP carrier BAC82547-Penicillium chrysogenum	Penicillium chrysogenum Wisconsin 54-1255	Mitochondrial ADP/ATP carrier proteins	C	sp|P49382|ADT_KLULA	ADP,ATP carrier protein OS=Kluyveromyces lac...
267	UniRef100_B9N9W5	4	Predicted protein	Populus trichocarpa	Molecular chaperones HSP70/HSC70, HSP70 superfamily	O	sp|P24629|HSP71_SOLLC	Heat shock cognate 70 kDa protein 1 OS=Sol...
268	UniRef100_A7EQJ7	14	Phosphorylase	Sclerotinia sclerotiorum 1980 UF-70	Glycogen phosphorylase	G	sp|Q00766|PHS1_DICDI	Glycogen phosphorylase 1 OS=Dictyostelium d...
269	UniRef100_A1CF77	20	Coatomer subunit gamma, putative	Aspergillus clavatus	Vesicle coat complex COPI, gamma subunit	U	sp|P87140|COPG_SCHPO	Probable coatomer subunit gamma OS=Schizosa...
270	UniRef100_A8N7C6	1	40S ribosomal protein S0	Coprinopsis cinerea okayama7#130	40S ribosomal protein SA (P40)/Laminin receptor 1	J	sp|B0D174|RSSA_LACBS	40S ribosomal protein S0 OS=Laccaria bicolo...
271	UniRef100_A6SHK9	2	Putative uncharacterized protein	Botryotinia fuckeliana B05.10	Methionine synthase II (cobalamin-independent)	E	sp|P82610|METE_CANAL	5-methyltetrahydropteroyltriglutamate--homo...
272	UniRef100_A4R931	4	Histone H4	Pezizomycotina	Histone H4	B	sp|Q7LKT3|H4_ASPFU	Histone H4 OS=Aspergillus fumigatus GN=hhfA P...
273	UniRef100_UPI0000382857		hypothetical protein Magn03001403	Magnetospirillum magnetotacticum MS-1	no hits found
274	UniRef100_D0T720	1	Predicted protein	Acinetobacter radioresistens	no hits found
275	UniRef100_A0ZZ21	1	ATP synthase subunit b, chloroplastic	Gossypium			sp|A0ZZ21|ATPF_GOSBA	ATP synthase subunit b, chloroplastic OS=Go...
276	UniRef100_B9D2W6	1	ATPase, AAA family protein	Campylobacter rectus RM3267	Molecular chaperone, HSP90 family	O	sp|A7I226|HTPG_CAMHC	Chaperone protein htpG OS=Campylobacter hom...
277	UniRef100_Q5ZE49	1	Putative uncharacterized protein P0006C01.45	Oryza sativa Japonica Group	no hits found
278	UniRef100_A1IIE3	10	Malate dehydrogenase (Fragment)	Iris x hollandica	Malate dehydrogenase	C	sp|Q08062|MDHC_MAIZE	Malate dehydrogenase, cytoplasmic OS=Zea ma...
279	UniRef100_B7JNY1	1	Putative uncharacterized protein	Bacillus cereus AH820	no hits found
280	UniRef100_A1DNC2	7	ATP citrate lyase, subunit 1, putative	Neosartorya fischeri NRRL 181	ATP-citrate lyase	C	sp|Q9P7W3|ACL1_SCHPO	Probable ATP-citrate synthase subunit 1 OS=...
281	UniRef100_A5ASW8	3	Putative uncharacterized protein	Vitis vinifera			sp|P27524|CB4A_SOLLC	Chlorophyll a-b binding protein CP24 10A, c...
282	UniRef100_P37211	1	ATP synthase subunit alpha, mitochondrial	Neurospora crassa	F0F1-type ATP synthase, alpha subunit	C	sp|P19483|ATPA_BOVIN	ATP synthase subunit alpha, mitochondrial O...
283	UniRef100_B2W2V5	1	ADP,ATP carrier protein	Pyrenophora tritici-repentis Pt-1C-BFP	Mitochondrial ADP/ATP carrier proteins	C	sp|P49382|ADT_KLULA	ADP,ATP carrier protein OS=Kluyveromyces lac...
284	UniRef100_B9HEW3	2	Predicted protein (Fragment)	Populus trichocarpa	Succinate dehydrogenase, flavoprotein subunit	C	sp|Q9UTJ7|DHSA_SCHPO	Probable succinate dehydrogenase [ubiquinon...
285	UniRef100_A5AZX9	4	Triosephosphate isomerase	Vitis vinifera	Triosephosphate isomerase	G	sp|P48494|TPIS_ORYSJ	Triosephosphate isomerase, cytosolic OS=Ory...
286	UniRef100_B3TLP2	1	Light-inducible protein ATLS1	Elaeis guineensis	Macrophage migration inhibitory factor	V
287	UniRef100_Q94I89	2	Putative NtPRp27-like protein (Fragment)	Atropa belladonna
288	UniRef100_B2B2M8	1	Predicted CDS Pa_6_2660	Podospora anserina	Elongation factor 2	J	sp|Q875Z2|EF2_SACCA	Elongation factor 2 OS=Saccharomyces castell...
289	UniRef100_B1W0S5	11	Trypsin	Streptomyces griseus	Secreted trypsin-like serine protease	O	sp|P00775|TRYP_STRGR	Trypsin OS=Streptomyces griseus GN=sprT PE=...
290	UniRef100_C7YMF8	2	Predicted protein	Nectria haematococca mpVI 77-13-4	40S ribosomal protein S4	J	sp|O59950|RS4_YARLI	40S ribosomal protein S4 OS=Yarrowia lipolyt...
291	UniRef100_A9EV31	1	Putative uncharacterized protein	Sorangium cellulosum 'So ce 56'	no hits found
292	UniRef100_A4QZX7	6	Putative uncharacterized protein	Magnaporthe grisea	Amino acid transporters	E	sp|P34054|INDA1_TRIAT	Amino-acid permease inda1 OS=Trichoderma a...
293	UniRef100_C8VUL6	3	Hypothetical serine protease (Eurofung)	Aspergillus nidulans FGSC A4	Subtilisin-related protease/Vacuolar protease B	O	sp|P40903|ISP6_SCHPO	Sexual differentiation process putative sub...
294	UniRef100_A8DNH8	9	Alpha tubulin (Fragment)	Hypocreales	Alpha tubulin	Z	sp|Q5I2J3|TBA_GIBZE	Tubulin alpha chain OS=Gibberella zeae GN=TU...
295	UniRef100_A6RKG7	2	Putative uncharacterized protein	Botryotinia fuckeliana B05.10	Translation elongation factor EF-1 gamma	J	sp|P29547|EF1G1_YEAST	Elongation factor 1-gamma 1 OS=Saccharomyc...
296	UniRef100_A2R932	9	Complex: SSB2 of S. cerevisiae binds to ribosomes and nascent polypeptide chains	Aspergillus niger	Molecular chaperones HSP70/HSC70, HSP70 superfamily	O	sp|Q6CQ83|HSP75_KLULA	Heat shock protein SSB OS=Kluyveromyces la...
297	UniRef100_A8IXT9	23	Temperature-induced lipocalin	Brassica rapa	Apolipoprotein D/Lipocalin	M	sp|Q46036|BLC_CITFR	Outer membrane lipoprotein blc OS=Citrobacte...
298	UniRef100_B8DCY6	5	D-isomer specific 2-hydroxyacid dehydrogenase family protein	Listeria monocytogenes	Phosphoglycerate dehydrogenase and related dehydrogenases	HE	sp|Q58424|SERA_METJA	D-3-phosphoglycerate dehydrogenase OS=Metha...
299	UniRef100_A0JZJ7	116	Aldehyde dehydrogenase (NAD(+))	Arthrobacter sp. FB24	NAD-dependent aldehyde dehydrogenases	C	sp|Q9RJZ6|ALDH_STRCO	Probable aldehyde dehydrogenase OS=Streptom...
300	UniRef100_A5K8M0	3	ATP synthase subunit beta	Plasmodium vivax	F0F1-type ATP synthase, beta subunit	C	sp|Q9PTY0|ATPB_CYPCA	ATP synthase subunit beta, mitochondrial OS...
301	UniRef100_A2QSB1	80	Function: the Gsp1	Aspergillus niger CBS 513.88	GTPase Ran/TC4/GSP1 (nuclear protein transport pathway), small G protein superfamily	U	sp|Q9P4E9|GSP1_CANAL	GTP-binding nuclear protein GSP1/Ran OS=Can...
302	UniRef100_A6STD0	7	40S ribosomal protein S20	Botryotinia fuckeliana B05.10	40S ribosomal protein S20	J	sp|P60868|RS20_RAT	40S ribosomal protein S20 OS=Rattus norvegicu...
303	UniRef100_A1CH83	21	Pyruvate carboxylase, putative	Aspergillus clavatus	Pyruvate carboxylase	C	sp|Q8X1T3|PYC_PICAN	Pyruvate carboxylase OS=Pichia angusta GN=PY...
304	UniRef100_C7YR12	2	Predicted protein	Nectria haematococca mpVI 77-13-4	40S ribosomal protein S15/S22	J	sp|Q7RV75|RS22_NEUCR	40S ribosomal protein S22 OS=Neurospora cra...
305	UniRef100_A1C653	10	Heat shock protein 70 (Hsp70)	Aspergillus clavatus	Molecular chaperones mortalin/PBP74/GRP75, HSP70 superfamily	O	sp|Q5B0C0|HSP7M_EMENI	Heat shock 70 kDa protein OS=Emericella ni...
306	UniRef100_Q00070	1	Pepsinogen	Aspergillus niger	Aspartyl protease	O	sp|P10977|CARPV_CANAL	Vacuolar aspartic protease OS=Candida albi...
307	UniRef100_Q9ZRU8	1	Stress and pathogenesis-related protein	Fagus sylvatica	no hits found		sp|O24248|PRU1_PRUAV	Major allergen Pru av 1 OS=Prunus avium GN=...
308	UniRef100_Q883Q1	1	Outer membrane porin OprF	Pseudomonas syringae pv. tomato	Outer membrane protein and related peptidoglycan-associated (lipo)proteins	M	sp|P13794|PORF_PSEAE	Outer membrane porin F OS=Pseudomonas aerug...
309	UniRef100_B2AMK1	7	Predicted CDS Pa_5_7040	Podospora anserina	no hits found		sp|P56588|XYNA_PENSI	Endo-1,4-beta-xylanase OS=Penicillium simpl...
310	UniRef100_A4RV66	4	Ribosomal protein L12, component of cytosolic 80S ribosome and 60S large subunit	Ostreococcus lucimarinus CCE9901	40S ribosomal protein S2	J	sp|Q9FF52|RL123_ARATH	60S ribosomal protein L12-3 OS=Arabidopsis...
311	UniRef100_C7YKD6	2	Putative uncharacterized protein	Nectria haematococca mpVI 77-13-4	Glucosamine 6-phosphate synthetases, contain amidotransferase and phosphosugar isomerase domains	M	sp|P14742|GFA1_YEAST	Glucosamine--fructose-6-phosphate aminotran...
312	UniRef100_B6HHG9	1	Pc21g00870 protein	Penicillium chrysogenum Wisconsin 54-1255	Transferrin receptor and related proteins containing the protease-associated (PA) domain	OPR	sp|A7UI09|LAP1_TRIEQ	Aminopeptidase Y OS=Trichophyton equinum GN...
313	UniRef100_UPI00019841D8		PREDICTED: hypothetical protein isoform 1	Vitis vinifera	F0F1-type ATP synthase, gamma subunit	C	sp|P05435|ATPG_SPIOL	ATP synthase gamma chain, chloroplastic OS=...
314	UniRef100_A6XHH1	1	Superoxide dismutase (Fragment)	Fagus sylvatica	Manganese superoxide dismutase	P	sp|P11796|SODM_NICPL	Superoxide dismutase [Mn], mitochondrial OS...
315	UniRef100_C6SW24	2	Putative uncharacterized protein	Glycine max	20S proteasome, regulatory subunit beta type PSMB2/PRE1	O	sp|O24633|PSB2B_ARATH	Proteasome subunit beta type-2-B OS=Arabid...
316	UniRef100_A0A4J9	11	Beta tubulin (Fragment)	Thaumatomonas sp. TMT002	Beta tubulin	Z	sp|P41352|TBB_TETTH	Tubulin beta chain OS=Tetrahymena thermophil...
317	UniRef100_Q55T85	9	Putative uncharacterized protein	Filobasidiella neoformans	Serine carboxypeptidases (lysosomal cathepsin A)	OE	sp|P52718|PEPF_ASPNG	Serine-type carboxypeptidase F OS=Aspergill...
318	UniRef100_P27774	1	Phosphoribulokinase, chloroplastic	Mesembryanthemum crystallinum	Armadillo/beta-Catenin/plakoglobin	TZ	sp|P27774|KPPR_MESCR	Phosphoribulokinase, chloroplastic OS=Mesem...
319	UniRef100_C6Y271	1	Elongation factor Tu	Pedobacter heparinus DSM 2366	GTPases - translation elongation factors	J	sp|Q11Q98|EFTU_CYTH3	Elongation factor Tu OS=Cytophaga hutchinso...
320	UniRef100_UPI000023D878	1	hypothetical protein FG05972.1	Gibberella zeae PH-1	Nucleoside diphosphate kinase	F	sp|Q7Z8P9|NDK_ASPFU	Nucleoside diphosphate kinase OS=Aspergillus...
321	UniRef100_A7KNG1	18	Cytochrome c oxidase subunit 2 (Fragment)	Arabidopsis thaliana	Cytochrome c oxidase, subunit II, and related proteins	C	sp|P93285|COX2_ARATH	Cytochrome c oxidase subunit 2 OS=Arabidops...
322	UniRef100_A6FHK9	1	Putative uncharacterized protein	Moritella sp. PE36	Uncharacterized protein conserved in bacteria	S	sp|P64529|Y3393_MYCBO	Uncharacterized protein Mb3393 OS=Mycobact...
323	UniRef100_Q2HBC5	1	Putative uncharacterized protein	Chaetomium globosum	Aminopeptidase I zinc metalloprotease (M18)	E	sp|O36014|DNPEP_SCHPO	Putative aspartyl aminopeptidase OS=Schizo...
324	UniRef100_Q9S886	1	Basic chitinase (Fragment)	Citrus sinensis	no hits found
325	UniRef100_C9SIM8	1	DNA damage checkpoint protein rad24	Verticillium albo-atrum VaMs.102	Multifunctional chaperone (14-3-3 family)	O	sp|Q99002|1433_TRIHA	14-3-3 protein homolog OS=Trichoderma harzi...
326	UniRef100_P47919	3	Nucleoside diphosphate kinase A	Flaveria bidentis	Nucleoside diphosphate kinase	F	sp|P47920|NDKB_FLABI	Nucleoside diphosphate kinase B OS=Flaveria...
327	UniRef100_A3QVX4	46	Glucose-6-phosphate isomerase	Marchantia polymorpha	Glucose-6-phosphate isomerase	G	sp|P54240|G6PI1_CLAXA	Glucose-6-phosphate isomerase, cytosolic
328	UniRef100_P84721	1	Putative NAD(P)-dependent glyceraldehyde-3-phosphate dehydrogenase PS5 (Fragments)	Pinus strobus	no hits found
329	UniRef100_B2A1Z7	1	Putative uncharacterized protein	Natranaerobius thermophilus JW/NM-WN-LF	no hits found
330	UniRef100_B8M045	1	Ribosomal protein S13p/S18e	Talaromyces stipitatus ATCC 10500	Ribosomal protein S18	J	sp|O94754|RS18_SCHPO	40S ribosomal protein S18 OS=Schizosaccharo...
331	UniRef100_C5ALD9	1	Rhs family protein	Burkholderia glumae BGR1	Rhs family protein	M	sp|P16919|RHSD_ECOLI	Protein rhsD OS=Escherichia coli (strain K1...
332	UniRef100_A9NYS4	10	Proteasome subunit beta type	Picea sitchensis	20S proteasome, regulatory subunit beta type PSMB5/PSMB8/PRE2	O	sp|Q9LIP2|PSB5B_ARATH	Proteasome subunit beta type-5-B OS=Arabid...
333	UniRef100_A7QEU4	3	Peroxidase 5	Vitis vinifera			sp|A7QEU4|PER5_VITVI	Peroxidase 5 OS=Vitis vinifera GN=GSVIVT000...
334	UniRef100_A4UCI5	12	Putative uncharacterized protein	Magnaporthe grisea	Arginase family protein	E	sp|Q9C0Y9|SPEB3_SCHPO	Putative agmatinase 3 OS=Schizosaccharomyc...
335	UniRef100_B9IJN4	5	Predicted protein	Populus trichocarpa			sp|Q9SSA5|CYP38_ARATH	Peptidyl-prolyl cis-trans isomerase CYP38,...
336	UniRef100_B2FPR0	2	Putative TonB dependent receptor	Stenotrophomonas maltophilia K279a	Outer membrane receptor proteins, mostly Fe transport	P
337	UniRef100_B2B0U9	3	Predicted CDS Pa_3_7380 (Fragment)	Podospora anserina	Acyl-CoA synthetase	I	sp|O94049|ACS1_CANAL	Acetyl-coenzyme A synthetase 1 OS=Candida a...
338	UniRef100_A0A330	126	Photosystem II D2 protein	core eudicotyledons			sp|A4GYQ4|PSBD_POPTR	Photosystem II D2 protein OS=Populus tricho...
339	UniRef100_D1IFH6	1	Whole genome shotgun sequence of line PN40024, scaffold_26.assembly12x (Fragment)	Vitis vinifera	Aldehyde dehydrogenase	C	sp|Q9SU63|AL2B4_ARATH	Aldehyde dehydrogenase family 2 member B4,...
340	UniRef100_B6XD36	1	Putative uncharacterized protein	Providencia alcalifaciens DSM 30120	Thiol-disulfide isomerase and thioredoxins	OC	sp|P0AA28|THIO_SALTY	Thioredoxin-1 OS=Salmonella typhimurium GN=...
341	UniRef100_A2QDM7	21	Catalytic activity: alpha-D-Glucose 1-phosphate = alpha-D-Glucose 6-phosphate	Aspergillus niger CBS 513.88	Phosphoglucomutase	G	sp|P37012|PGM2_YEAST	Phosphoglucomutase-2 OS=Saccharomyces cerev...
342	UniRef100_A2R9F2	12	Remark: manual BLASTP homologue PIR:DERTCM	Aspergillus niger CBS 513.88	Predicted acyl-CoA dehydrogenase	R	sp|Q5ZHT1|ACD11_CHICK	Acyl-CoA dehydrogenase family member 11 OS...
343	UniRef100_B2AAR4	4	Predicted CDS Pa_1_4920	Podospora anserina	Cyclophilin type peptidyl-prolyl cis-trans isomerase	O	sp|P18253|CYPH_SCHPO	Peptidyl-prolyl cis-trans isomerase OS=Schi...
344	UniRef100_C7QBH5	1	Transcriptional regulator, XRE family	Catenulispora acidiphila DSM 44928	no hits found
345	UniRef100_Q5K8H5	1	Histone H4	Filobasidiella neoformans	Histone H4	B	sp|P62792|H4_PHACH	Histone H4 OS=Phanerochaete chrysosporium GN=...
346	UniRef100_A6RW23	2	Putative uncharacterized protein	Botryotinia fuckeliana B05.10	Trypsin	E	sp|P35049|TRYP_FUSOX	Trypsin OS=Fusarium oxysporum PE=1 SV=1
347	UniRef100_Q01294	1	Vacuolar protease A	Neurospora crassa	Aspartyl protease	O	sp|P10977|CARPV_CANAL	Vacuolar aspartic protease OS=Candida albi...
348	UniRef100_C2M3V7	1	Chaperone and heat shock protein 70	Capnocytophaga gingivalis ATCC 33624
349	UniRef100_Q3V2E0	3	Putative uncharacterized protein	Mus musculus	Trypsin	E	sp|P06872|TRY2_CANFA	Anionic trypsin OS=Canis familiaris PE=2 SV=1
350	UniRef100_A7BLS3	2	Putative uncharacterized protein	Beggiatoa sp. SS	no hits found
351	UniRef100_B9S1F6	1	Protein dif-1, putative	Ricinus communis	Mitochondrial carnitine-acylcarnitine carrier protein	C	sp|Q93XM7|MCAT_ARATH	Mitochondrial carnitine/acylcarnitine carri...
352	UniRef100_C9SKV4	1	Stomatin-2	Verticillium albo-atrum VaMs.102	Prohibitins and stomatins of the PID superfamily	C	sp|Q5UP73|YR614_MIMIV	Putative band 7 family protein R614 OS=Aca...
353	UniRef100_Q68KY2	1	Beta-glucosidase	Phaeosphaeria avenaria f. sp. triticae			sp|P48825|BGL1_ASPAC	Beta-glucosidase 1 OS=Aspergillus aculeatus...
354	UniRef100_C6RM02	1	Putative uncharacterized protein	Acinetobacter radioresistens	no hits found
355	UniRef100_D0T5P6	1	Putative uncharacterized protein	Acinetobacter radioresistens SH164	no hits found
356	UniRef100_A2IBY3	30	OmpE36	Enterobacter aerogenes	Outer membrane protein (porin)	M	sp|P0A263|OMPC_SALTY	Outer membrane protein C OS=Salmonella typh...
357	UniRef100_P12355	1	Photosystem I reaction center subunit III, chloroplastic	Spinacia oleracea			sp|P12356|PSAF_CHLRE	Photosystem I reaction center subunit III,
358	UniRef100_A4UBZ2	5	Putative uncharacterized protein	Magnaporthe grisea	no hits found		sp|Q01738|CDH_PHACH	Cellobiose dehydrogenase OS=Phanerochaete ch...
359	UniRef100_A4QYX6	1	Putative uncharacterized protein	Magnaporthe grisea	no hits found		sp|P62695|GUX1_TRIKO	Exoglucanase 1 OS=Trichoderma koningii GN=c...
360	UniRef100_A7Y7M4	1	Malic enzyme (Fragment)	Prunus dulcis	NADP+-dependent malic enzyme	C	sp|Q8BMF3|MAON_MOUSE	NADP-dependent malic enzyme, mitochondrial
361	UniRef100_B5H9S4	2	Streptogrisin-B	Streptomyces pristinaespiralis ATCC 25486	no hits found		sp|P00777|PRTB_STRGR	Streptogrisin-B OS=Streptomyces griseus GN=...
362	UniRef100_A9QBZ4	57	ATP synthase epsilon chain (Fragment)	Scaevola aemula	Mitochondrial F1F0-ATP synthase, subunit delta/ATP16	C	sp|Q2L911|ATPE_GOSHI	ATP synthase epsilon chain, chloroplastic O...
363	UniRef100_Q8J0C0	2	Histone H4 (Fragment)	Glomerellaceae	Histone H4	B	sp|Q7LKT3|H4_ASPFU	Histone H4 OS=Aspergillus fumigatus GN=hhfA P...
364	UniRef100_C3X6U1	1	Predicted protein	Oxalobacter formigenes HOxBLS	no hits found
365	UniRef100_B8EI95	1	Glyceraldehyde-3-phosphate dehydrogenase, type I	Methylocella silvestris BL2	Glyceraldehyde-3-phosphate dehydrogenase/erythrose-4-phosphate dehydrogenase	G	sp|P50321|G3PC_RALEH	Glyceraldehyde-3-phosphate dehydrogenase, c...
366	UniRef100_A1C5D0	47	Proteasome subunit alpha type	Aspergillus clavatus	20S proteasome, regulatory subunit alpha type PSMA7/PRE6	O	sp|P40303|PSA7_YEAST	Proteasome component PRE6 OS=Saccharomyces
367	UniRef100_Q9UXV3	1	Predicted ATPase of the PP-loop superfamily	Pyrococcus abyssi	Predicted ATPase of the PP-loop superfamily implicated in cell cycle control	D	sp|Q58994|Y1599_METJA	Uncharacterized protein MJ1599 OS=Methanoc...
368	UniRef100_UPI0001AF40C7		OprF	Pseudomonas syringae pv. oryzae str. 1_6	Outer membrane protein and related peptidoglycan-associated (lipo)proteins	M	sp|P13794|PORF_PSEAE	Outer membrane porin F OS=Pseudomonas aerug...
369	UniRef100_UPI0001662ABB		PREDICTED: similar to actin alpha 1 skeletal muscle protein	Homo sapiens	Actin and related proteins	Z	sp|P60707|ACTB_TRIVU	Actin, cytoplasmic 1 OS=Trichosurus vulpecu...
370	UniRef100_Q9FRW7	1	Aspartic proteinase 3	Nepenthes alata	Aspartyl protease	O	sp|P42211|ASPRX_ORYSJ	Aspartic proteinase OS=Oryza sativa subsp....
371	UniRef100_A9BMM5	1	Membrane-associated zinc metalloprotease	Delftia acidovorans SPH-1	Predicted membrane-associated Zn-dependent proteases 1	M	sp|Q8XZI4|Y1411_RALSO	Putative zinc metalloprotease RSc1411 OS=R...
372	UniRef100_B2VU09	1	Aldehyde dehydrogenase	Pyrenophora tritici-repentis Pt-1C-BFP	Aldehyde dehydrogenase	C	sp|P42041|ALDH_ALTAL	Aldehyde dehydrogenase OS=Alternaria altern...
373	UniRef100_Q59IV3	1	Putative mitochondrial dicarboxylate transporter	Mesembryanthemum crystallinum	Mitochondrial oxoglutarate/malate carrier proteins	C	sp|P0C582|M2OM_NEUCR	Putative mitochondrial 2-oxoglutarate/malat...
374	UniRef100_P0C0Y5	2	Probable NADP-dependent mannitol dehydrogenase	Davidiella tassiana	Reductases with broad range of substrate specificities	R	sp|P0C0Y4|MTDH_ALTAL	Probable NADP-dependent mannitol dehydrogen...
375	UniRef100_A1CPG7	32	Mitogen-activated protein kinase hog1	Aspergillus clavatus	Mitogen-activated protein kinase	T	sp|Q9UV51|HOG1_MAGGR	Mitogen-activated protein kinase HOG1 OS=Ma...
376	UniRef100_Q2HTU3	1	Ubiquitin	Medicago truncatula	Ubiquitin and ubiquitin-like proteins	OR	sp|P69326|UBIQ_WHEAT	Ubiquitin OS=Triticum aestivum PE=3 SV=1
377	UniRef100_P46281	5	Carbonic anhydrase	Flaveria pringlei	Predicted carbonic anhydrase involved in protection against oxidative damage	P	sp|P46512|CAH1_FLALI	Carbonic anhydrase 1 OS=Flaveria linearis P...
378	UniRef100_B6SZT9	3	Chlorophyll a-b binding protein	Zea mays			sp|P14278|CB24_SOLLC	Chlorophyll a-b binding protein 4, chloropl...
379	UniRef100_D1IVU2	1	Whole genome shotgun sequence of line PN40024, scaffold_44.assembly12x (Fragment)	Vitis vinifera	UDP-glucose pyrophosphorylase	G	sp|Q9SDX3|UGPA_MUSAC	UTP--glucose-1-phosphate uridylyltransferas...
380	UniRef100_B2W0U7	2	NADP-specific glutamate dehydrogenase	Pyrenophora tritici-repentis Pt-1C-BFP	Glutamate/leucine/phenylalanine/valine dehydrogenases	E	sp|O93934|DHE4_BOTFU	NADP-specific glutamate dehydrogenase OS=Bo...
381	UniRef100_A3WF44	6	60 kDa chaperonin	Erythrobacter sp. NAP1	Chaperonin GroEL (HSP60 family)	O	sp|P48220|CH60_ZYMMO	60 kDa chaperonin OS=Zymomonas mobilis GN=g...
382	UniRef100_A1CU27	2	Aldehyde dehydrogenase	Aspergillus clavatus	Aldehyde dehydrogenase	C	sp|P42041|ALDH_ALTAL	Aldehyde dehydrogenase OS=Alternaria altern...
383	UniRef100_O48906	2	Malate dehydrogenase	Medicago sativa	NAD-dependent malate dehydrogenase	C	sp|Q9SN86|MDHP_ARATH	Malate dehydrogenase, chloroplastic OS=Arab...
384	UniRef100_A6R6G3	10	Ribosomal protein L7a	Ajellomyces capsulatus NAm1	60S ribosomal protein L7A	J	sp|P29453|RL8B_YEAST	60S ribosomal protein L8-B OS=Saccharomyces...
385	UniRef100_B8M0Y3	1	Ribosomal protein L18	Talaromyces stipitatus ATCC 10500	60s ribosomal protein L18	J	sp|Q10192|RL18A_SCHPO	60S ribosomal protein L18-A OS=Schizosacch...
386	UniRef100_Q56YA5	1	Serine--glyoxylate aminotransferase	Arabidopsis thaliana	Alanine-glyoxylate aminotransferase AGT1	R	sp|O08374|SGAA_HYPME	Serine--glyoxylate aminotransferase OS=Hyph...
387	UniRef100_UPI0000D9D9E3		PREDICTED: similar to eukaryotic translation elongation factor 1 alpha 1 isoform 4	Macaca mulatta	Translation elongation factor EF-1 alpha/Tu	J	sp|P68104|EF1A1_HUMAN	Elongation factor 1-alpha 1 OS=Homo sapien...
388	UniRef100_Q6YLP7	1	Ribulose bisphosphate carboxylase large chain (Fragment)	Pogonatum pensilvanicum			sp|Q19V64|RBL_CHLAT	Ribulose bisphosphate carboxylase large chai...
389	UniRef100_C0NYC6	4	Hsp70-like protein	Ajellomyces capsulatus G186AR	Molecular chaperones HSP70/HSC70, HSP70 superfamily	O	sp|P87047|HSP71_PARBA	Heat shock 70 kDa protein 1 OS=Paracoccidi...
390	UniRef100_A1CXP1	3	5-methyltetrahydropteroyltriglutamate--homocysteine S-methyltransferase	Neosartorya fischeri NRRL 181	Methionine synthase II (cobalamin-independent)	E	sp|Q87BY8|METE_XYLFT	5-methyltetrahydropteroyltriglutamate--homo...
391	UniRef100_Q5UF97	1	Ribulose bisphosphate carboxylase large chain (Fragment)	Cremastosperma bullatum			sp|P61293|RBL_MAGTR	Ribulose bisphosphate carboxylase large chai...
392	UniRef100_A5CRH9	2	Glutamine synthetase I	Clavibacter michiganensis subsp. michiganensis NCPPB 382	Glutamine synthetase	E	sp|Q05542|GLNA1_STRVR	Glutamine synthetase 1 OS=Streptomyces vir...
393	UniRef100_A9PFJ5	6	Putative uncharacterized protein	Populus trichocarpa	Glycerophosphoryl diester phosphodiesterase	C	sp|P09394|GLPQ_ECOLI	Glycerophosphoryl diester phosphodiesterase...
394	UniRef100_O50002	1	Cysteine protease	Prunus armeniaca	Cysteine proteinase Cathepsin L	O	sp|Q8H166|ALEU_ARATH	Thiol protease aleurain OS=Arabidopsis thal...
395	UniRef100_A9PF62	5	Putative uncharacterized protein	Populus trichocarpa			sp|Q23892|GLUA_DICDI	Lysosomal beta glucosidase OS=Dictyostelium...
396	UniRef100_C6TH54	1	Putative uncharacterized protein	Glycine max			sp|Q9M2P7|PAP9_ARATH	Probable plastid-lipid-associated protein
397	UniRef100_A6WXW9	3	ATP synthase subunit alpha	Ochrobactrum anthropi ATCC 49188	F0F1-type ATP synthase, alpha subunit	C	sp|A9M839|ATPA_BRUC2	ATP synthase subunit alpha OS=Brucella cani...
398	UniRef100_C6SY14	1	Putative uncharacterized protein	Glycine max
399	UniRef100_C7PRE9	1	OmpA/MotB domain protein	Chitinophaga pinensis DSM 2588	no hits found
400	UniRef100_Q9FXV2	2	Legumin (Fragment)	Quercus acutissima			sp|P09800|LEGB_GOSHI	Legumin B OS=Gossypium hirsutum GN=LEGB PE=...
401	UniRef100_A8IEU1	1	Putative outer membrane protein, putative porin	Azorhizobium caulinodans ORS 571	no hits found
402	UniRef100_C6SZM2	1	Photosystem II reaction center psb28 protein	Glycine max			sp|Q0JG75|PSB28_ORYSJ	Photosystem II reaction center PSB28 prote...
403	UniRef100_C7YSV9	2	Predicted protein	Nectria haematococca mpVI 77-13-4	Subtilisin-related protease/Vacuolar protease B	O	sp|P09232|PRTB_YEAST	Cerevisin OS=Saccharomyces cerevisiae GN=PR...
404	UniRef100_C3BXX4	1	Putative uncharacterized protein	Bacillus thuringiensis serovar tochigiensis BGSC 4Y1	ABC-type nitrate/sulfonate/bicarbonate transport systems, periplasmic components	P	sp|P44658|Y357_HAEIN	Putative thiamine biosynthesis protein HI03...
405	UniRef100_A1D6N2	9	Oxidoreductase, zinc-binding	Neosartorya fischeri NRRL 181	Alcohol dehydrogenase, class V	Q	sp|Q04894|ADH6_YEAST	NADP-dependent alcohol dehydrogenase 6 OS=S...
406	UniRef100_A1CBQ2	5	Agmatinase, putative	Aspergillus clavatus	Arginase family protein	E	sp|Q9C0Y9|SPEB3_SCHPO	Putative agmatinase 3 OS=Schizosaccharomyc...
407	UniRef100_C9S6Q9	1	Outer mitochondrial membrane protein porin	Verticillium albo-atrum VaMs.102	Porin/voltage-dependent anion-selective channel protein	P	sp|Q9P544|VDAC_SCHPO	Probable mitochondrial outer membrane prote...
408	UniRef100_A4RKY3	9	Putative uncharacterized protein	Magnaporthe grisea	Serine/threonine protein phosphatase	T	sp|Q09172|PP2C2_SCHPO	Protein phosphatase 2C homolog 2 OS=Schizo...
409	2001280060	1	Uncharacterized conserved protein [Soil: Diversa Silage]
410	UniRef100_B8X9S7	1	Endochitinase (Fragment)	Hypocrea alutacea	Chitinase	G	sp|P48827|CHI4_TRIHA	42 kDa endochitinase OS=Trichoderma harzian...
411	UniRef100_Q5XQ46	1	Family 10 xylanase	Cryptovalsa sp. BCC 7197	no hits found		sp|P23360|XYNA_THEAU	Endo-1,4-beta-xylanase OS=Thermoascus auran...
412	UniRef100_B9GGE2	1	Predicted protein (Fragment)	Populus trichocarpa	Zinc-binding oxidoreductase	CR	sp|Q0VC50|RT4I1_BOVIN	Reticulon-4-interacting protein 1, mitocho...
413	UniRef100_D1IEY2	1	Whole genome shotgun sequence of line PN40024, scaffold_26.assembly12x (Fragment)	Vitis vinifera
414	UniRef100_B9H3X7	1	Predicted protein (Fragment)	Populus trichocarpa	Serine protease	O	sp|Q9LU10|DEGP8_ARATH	Protease Do-like 8, chloroplastic OS=Arabi...
415	UniRef100_P06805	3	Elongation factor 1-alpha	Mucor racemosus	Translation elongation factor EF-1 alpha/Tu	J	sp|P28295|EF1A_ABSGL	Elongation factor 1-alpha OS=Absidia glauca...
416	UniRef100_C0SAL3	4	Putative uncharacterized protein	Paracoccidioides brasiliensis Pb03	no hits found		sp|P87109|YDK2_SCHPO	Probable phospholipase C20G8.02, mitochondr...
417	UniRef100_A5C314	4	Putative uncharacterized protein	Vitis vinifera	Predicted glyoxalase	G	sp|Q39366|LGUL_BRAOG	Putative lactoylglutathione lyase OS=Brassi...
418	UniRef100_O81355	1	Isoflavone reductase related protein	Pyrus communis			sp|P52577|IFRH_ARATH	Isoflavone reductase homolog P3 OS=Arabidop...
419	UniRef100_A9PF34	10	Aminomethyltransferase	Populus trichocarpa	Aminomethyl transferase	E	sp|P54260|GCST_SOLTU	Aminomethyltransferase, mitochondrial OS=So...
420	UniRef100_A2Q3A6	53	Plasma-membrane proton-efflux P-type ATPase	Medicago truncatula	Plasma membrane H+-transporting ATPase	P	sp|Q03194|PMA4_NICPL	Plasma membrane ATPase 4 OS=Nicotiana plumb...
421	UniRef100_B0U2E9	4	Outer membrane protein P6	Xylella fastidiosa	Outer membrane protein and related peptidoglycan-associated (lipo)proteins	M
422	UniRef100_A2I7W3	1	Pectate lyase (Fragment)	Penicillium citrinum	no hits found		sp|O59939|PELB_COLGL	Pectate lyase B OS=Colletotrichum gloeospor...
423	UniRef100_B0CQ43	1	Elongation factor 1-alpha	Laccaria bicolor S238N-H82	Translation elongation factor EF-1 alpha/Tu	J	sp|P14864|EF1A2_RHIRA	Elongation factor 1-alpha OS=Rhizomucor ra...
424	UniRef100_B6HRM9	1	Pc22g24890 protein	Penicillium chrysogenum Wisconsin 54-1255	no hits found		sp|O59939|PELB_COLGL	Pectate lyase B OS=Colletotrichum gloeospor...
425	UniRef100_A3LQD6	1	Enolase	Pichia stipitis	Enolase	G	sp|Q870B9|ENO_RHORB	Enolase OS=Rhodotorula rubra GN=ENO PE=1 SV=1
426	UniRef100_A4ALR8	1	Glutamine synthetase	marine actinobacterium PHSC20C1	Glutamine synthetase	E	sp|Q05542|GLNA1_STRVR	Glutamine synthetase 1 OS=Streptomyces vir...
427	UniRef100_C7PK45	1	Histone family protein DNA-binding protein	Chitinophaga pinensis DSM 2588	no hits found
428	UniRef100_A1C7Y5	23	Cyanate hydratase, putative	Aspergillus clavatus	no hits found		sp|Q0I634|CYNS_SYNS3	Cyanate hydratase OS=Synechococcus sp. (str...
429	UniRef100_B9RNW8	2	NADP-dependent glyceraldehyde-3-phosphate dehydrogenase, putative	Ricinus communis	Aldehyde dehydrogenase	C	sp|P93338|GAPN_NICPL	NADP-dependent glyceraldehyde-3-phosphate d...
430	UniRef100_C7DUZ4	10	Subtilisin-like serine protease PR1H (Fragment)	Metarhizium majus	Subtilisin-related protease/Vacuolar protease B	O	sp|P09232|PRTB_YEAST	Cerevisin OS=Saccharomyces cerevisiae GN=PR...
431	UniRef100_A1C6F9	10	Secretory pathway gdp dissociation inhibitor	Aspergillus clavatus	RAB proteins geranylgeranyltransferase component A (RAB escort protein)	O	sp|Q10305|GDI1_SCHPO	Probable secretory pathway GDP dissociation...
432	UniRef100_Q5DT20	2	Hornerin	Homo sapiens	no hits found		sp|Q86YZ3|HORN_HUMAN	Hornerin OS=Homo sapiens GN=HRNR PE=1 SV=2
433	UniRef100_UPI00001D0817	1	PREDICTED: similar to Bromodomain adjacent to zinc finger domain protein 1B (Williams-Beuren syndrome chromosome region 9 protein homolog) (WBRS9)	Rattus norvegicus	Chromatin remodeling complex WSTF-ISWI, large subunit (contains heterochromatin localization, PHD and BROMO domains)	B	sp|A2BIL7|BAZ1B_DANRE	Tyrosine-protein kinase BAZ1B OS=Danio rer...
434	UniRef100_Q58YD9	1	Gamma-actin	Blakeslea trispora	Actin and related proteins	Z	sp|P68143|ACTB_OREMO	Actin, cytoplasmic 1 OS=Oreochromis mossamb...
435	UniRef100_C6W5G4	1	Diaminopimelate decarboxylase	Dyadobacter fermentans DSM 18053	Diaminopimelate decarboxylase	E	sp|O27390|DCDA_METTH	Diaminopimelate decarboxylase OS=Methanobac...
436	UniRef100_A6SAE6	2	Elongation factor 1-alpha	Botryotinia fuckeliana B05.10	Translation elongation factor EF-1 alpha/Tu	J	sp|Q01765|EF1A_PODCU	Elongation factor 1-alpha OS=Podospora curv...
437	UniRef100_B9HAQ4	1	Predicted protein	Populus trichocarpa	Chitinase	G	sp|Q13231|CHIT1_HUMAN	Chitotriosidase-1 OS=Homo sapiens GN=CHIT1...
438	UniRef100_C7YYH5	1	Adenosylhomocysteinase	Nectria haematococca mpVI 77-13-4	S-adenosylhomocysteine hydrolase	H	sp|P39954|SAHH_YEAST	Adenosylhomocysteinase OS=Saccharomyces cer...
439	UniRef100_P34825	1	Elongation factor 1-alpha	Hypocrea jecorina	Translation elongation factor EF-1 alpha/Tu	J	sp|P34825|EF1A_TRIRE	Elongation factor 1-alpha OS=Trichoderma re...
440	UniRef100_A5AL61	3	Putative uncharacterized protein	Vitis vinifera	Predicted unusual protein kinase	R	sp|Q9ASX5|Y5520_ARATH	Uncharacterized aarF domain-containing pro...
441	UniRef100_A3GGD9	4	Malate dehydrogenase	Pichia stipitis	NAD-dependent malate dehydrogenase	C	sp|Q9Y7R8|MDHM_SCHPO	Malate dehydrogenase, mitochondrial OS=Schi...
442	UniRef100_Q8H1T3	1	Ferritin-2, chloroplastic	Nicotiana tabacum	Ferritin	P	sp|Q948P6|FRI3_SOYBN	Ferritin-3, chloroplastic OS=Glycine max PE...
443	UniRef100_B2WMR5	4	Leucine aminopeptidase 2	Pyrenophora tritici-repentis Pt-1C-BFP	Transferrin receptor and related proteins containing the protease-associated (PA) domain	OPR	sp|Q5QHG5|LAP2_TRIRU	Leucine aminopeptidase 2 OS=Trichophyton ru...
444	UniRef100_B3TLV1	1	Thioredoxin peroxidase	Elaeis guineensis	Alkyl hydroperoxide reductase, thiol specific antioxidant and related enzymes	O	sp|Q96468|BAS1_HORVU	2-Cys peroxiredoxin BAS1, chloroplastic (Fr...
445	UniRef100_C9SBG2	1	Woronin body major protein	Verticillium albo-atrum VaMs.102	no hits found		sp|P87252|HEX1_NEUCR	Woronin body major protein OS=Neurospora cr...
446	UniRef100_C5TFQ8	3	OmpA/MotB domain protein	Zymomonas mobilis subsp. mobilis ATCC 10988	no hits found
447	UniRef100_B2AVK3	2	Predicted CDS Pa_7_2650	Podospora anserina	no hits found		sp|Q01738|CDH_PHACH	Cellobiose dehydrogenase OS=Phanerochaete ch...
448	UniRef100_Q9SU63	1	Aldehyde dehydrogenase family 2 member B4, mitochondrial	Arabidopsis thaliana	Aldehyde dehydrogenase	C	sp|Q9SU63|AL2B4_ARATH	Aldehyde dehydrogenase family 2 member B4,...
449	UniRef100_B9RY20	1	Zinc metalloprotease, putative	Ricinus communis	Metalloendoprotease HMP1 (insulinase superfamily)	RO	sp|Q8VY06|PREP2_ARATH	Presequence protease 2, chloroplastic/mito...
450	UniRef100_A1CYB8	1	Pectate lyase, putative	Neosartorya fischeri NRRL 181	no hits found		sp|O59939|PELB_COLGL	Pectate lyase B OS=Colletotrichum gloeospor...
451	UniRef100_A5AMY6	3	Putative uncharacterized protein	Vitis vinifera			sp|O65351|SUBL_ARATH	Subtilisin-like protease OS=Arabidopsis tha...
452	UniRef100_P15252	2	Rubber elongation factor protein	Hevea brasiliensis			sp|P69327|AMYG_ASPAW	Glucoamylase OS=Aspergillus awamori GN=GLAA...
453	UniRef100_Q0U9U5	1	Putative uncharacterized protein	Phaeosphaeria nodorum	no hits found
454	UniRef100_Q0UVU7	1	Putative uncharacterized protein	Phaeosphaeria nodorum	no hits found
455	UniRef100_A7SZW8	1	Predicted protein	Nematostella vectensis	no hits found
456	UniRef100_B2FQM8	1	Putative outer membrane protein	Stenotrophomonas maltophilia K279a	Outer membrane protein and related peptidoglycan-associated (lipo)proteins	M	sp|Q7NFT5|PSAB_GLOVI	Photosystem I P700 chlorophyll a apoprotein...
457	UniRef100_Q9GT29	1	Malate dehydrogenase	Phytomonas sp. isolate Ech1	NAD-dependent malate dehydrogenase	C	sp|B0TUH8|MDH_SHEHH	Malate dehydrogenase OS=Shewanella halifaxen...
458	UniRef100_A1USC1	25	Elongation factor Tu 1	Bartonella bacilliformis KC583	GTPases - translation elongation factors	J	sp|A9ISD9|EFTU_BART1	Elongation factor Tu OS=Bartonella tribocor...
459	UniRef100_Q20BN1	1	Cytochrome b6-f complex iron-sulfur subunit	Panax ginseng	Ubiquinol cytochrome c reductase, subunit RIP1	C	sp|P08980|UCRIA_SPIOL	Cytochrome b6-f complex iron-sulfur subuni...
460	UniRef100_A6R2Y5	19	Elongation factor 3	Ajellomyces capsulatus NAm1	ATPase component of ABC transporters with duplicated ATPase domains/Translation elongation factor EF-3b	EJ	sp|P53978|EF3B_YEAST	Elongation factor 3B OS=Saccharomyces cerev...
461	UniRef100_B2AT16	6	Predicted CDS Pa_1_14360	Podospora anserina	no hits found		sp|A4RC89|NACA_MAGGR	Nascent polypeptide-associated complex subu...
462	UniRef100_O22462	5	Barperm1 (Fragment)	Hordeum vulgare			sp|P81370|TLP_ACTDE	Thaumatin-like protein OS=Actinidia delicios...
463	UniRef100_Q121L2	1	tRNA modification GTPase mnmE	Polaromonas sp. JS666	Predicted GTPase	R	sp|A1WDB4|MNME_ACISJ	tRNA modification GTPase mnmE OS=Acidovorax...
464	UniRef100_A5BKL4	11	Putative uncharacterized protein	Vitis vinifera	Predicted NAD-dependent oxidoreductase	R	sp|Q39173|P2_ARATH	Probable NADP-dependent oxidoreductase P2 OS=...
465	UniRef100_A8PUT8	1	Putative uncharacterized protein	Brugia malayi			sp|Q11102|TG278_CAEEL	Putative protein tag-278 OS=Caenorhabditis...
466	UniRef100_A8WKW7	1	Putative uncharacterized protein	root	FOG: Hormone receptors	T	sp|Q9GTD4|NHR71_CAEEL	Nuclear hormone receptor family member nhr...
467	UniRef100_A8NLP8	1	Putative uncharacterized protein	Coprinopsis cinerea okayama7#130	no hits found
468	UniRef100_A9PL02	3	Mitochondrial glycine decarboxylase complex P-protein	Populus tremuloides	Glycine dehydrogenase (decarboxylating)	E	sp|Q94B78|GCSP2_ARATH	Glycine dehydrogenase [decarboxylating] 2,...
469	UniRef100_UPI0000DA2F64		PREDICTED: similar to thrombospondin repeat containing 1	Rattus norvegicus	Disintegrin metalloproteinases with thrombospondin repeats	O	sp|Q3UTY6|THSD4_MOUSE	Thrombospondin type-1 domain-containing pr...
470	UniRef100_C6T8W8	1	Putative uncharacterized protein	Glycine max			sp|P16059|PSBP_PEA	Oxygen-evolving enhancer protein 2, chloropla...
471	UniRef100_O82660	1	Photosystem II stability/assembly factor HCF136, chloroplastic	Arabidopsis thaliana	Sortilin and related receptors	R	sp|Q5Z5A8|P2SAF_ORYSJ	Photosystem II stability/assembly factor H...
472	UniRef100_C6EVF9	3	Elongation factor 1-alpha	Glycine max	Translation elongation factor EF-1 alpha/Tu	J	sp|O49169|EF1A_MANES	Elongation factor 1-alpha OS=Manihot escule...
473	UniRef100_B5LRC4	5	Superoxide dismutase [Cu-Zn] (Fragment)	Vicia faba	no hits found		sp|O65198|SODCP_MEDSA	Superoxide dismutase [Cu-Zn], chloroplasti...
474	UniRef100_C6TAV0	4	Putative uncharacterized protein	Glycine max			sp|Q9ZRA4|AB19A_PRUPE	Auxin-binding protein ABP19a OS=Prunus per...
475	UniRef100_A1CNN8	11	40S ribosomal protein S22	Trichocomaceae	40S ribosomal protein S15/S22	J	sp|Q7RV75|RS22_NEUCR	40S ribosomal protein S22 OS=Neurospora cra...
476	UniRef100_Q0UJY8	1	Putative uncharacterized protein	Phaeosphaeria nodorum			sp|P53693|RDS1_SCHPO	Protein rds1 OS=Schizosaccharomyces pombe G...
477	UniRef100_C7Z218	1	Putative uncharacterized protein	Nectria haematococca mpVI 77-13-4	40S ribosomal protein S14	J	sp|O22584|RS14_LUPLU	40S ribosomal protein S14 OS=Lupinus luteus...
478	UniRef100_Q1QMA7	2	Type I secretion outer membrane protein, TolC	Nitrobacter hamburgensis X14	Outer membrane protein	MU
479	UniRef100_Q9FF05	1	Osmotin-like protein (Fragment)	Fagus sylvatica			sp|P50700|OSL3_ARATH	Osmotin-like protein OSM34 OS=Arabidopsis t...
480	UniRef100_B9SJY9	1	Fructose-bisphosphate aldolase	Ricinus communis	Fructose-biphosphate aldolase	G	sp|Q01516|ALFC1_PEA	Fructose-bisphosphate aldolase 1, chloroplas...
481	UniRef100_C7ZD60	1	Predicted protein	Nectria haematococca mpVI 77-13-4	Alkyl hydroperoxide reductase, thiol specific antioxidant and related enzymes	O	sp|P34227|PRX1_YEAST	Mitochondrial peroxiredoxin PRX1 OS=Sacchar...
482	UniRef100_B2LML8	5	ATP-dependent Clp protease proteolytic subunit	Guizotia abyssinica	ATP-dependent Clp protease, proteolytic subunit	O	sp|P12210|CLPP_TOBAC	ATP-dependent Clp protease proteolytic subu...
483	UniRef100_Q9M1B9	1	Probable fructokinase-4	Arabidopsis thaliana	Ribokinase	G	sp|Q7XJ81|SCRK2_SOLHA	Fructokinase-2 OS=Solanum habrochaites GN=...
484	UniRef100_B4S112	5	60 kDa chaperonin	Alteromonas macleodii 'Deep ecotype'	Chaperonin GroEL (HSP60 family)	O	sp|P25750|CH60_BUCAI	60 kDa chaperonin OS=Buchnera aphidicola su...
485	UniRef100_A5AY42	2	Putative uncharacterized protein	Vitis vinifera	Mitochondrial F1F0-ATP synthase, subunit d/ATP7	C	sp|Q9FT52|ATP5H_ARATH	ATP synthase subunit d, mitochondrial OS=A...
486	UniRef100_A2WPC2	19	Putative uncharacterized protein	Oryza sativa Indica Group	Dihydrolipoamide dehydrogenase	C	sp|Q9M5K3|DLDH1_ARATH	Dihydrolipoyl dehydrogenase 1, mitochondri...
487	UniRef100_B6U4F7	2	Acylamino-acid-releasing enzyme	Zea mays	Dipeptidyl aminopeptidase	O	sp|Q8R146|APEH_MOUSE	Acylamino-acid-releasing enzyme OS=Mus musc...
488	2001351427	10	Glucose dehydrogenase [Soil: Diversa Silage]		Glucose dehydrogenase	G	sp|P29968|XOXF_PARDE	Putative dehydrogenase xoxF OS=Paracoccus d...
489	UniRef100_Q6C2B5	1	Nucleoside diphosphate kinase	Yarrowia lipolytica	Nucleoside diphosphate kinase	F	sp|Q7Z8P9|NDK_ASPFU	Nucleoside diphosphate kinase OS=Aspergillus...
490	UniRef100_A3LPD9	8	Heat shock protein 90 homolog	Pichia stipitis	Molecular chaperone (HSP90 family)	O	sp|P46598|HSP90_CANAL	Heat shock protein 90 homolog OS=Candida a...
491	UniRef100_B3PKS5	1	Cip2	Cellvibrio japonicus Ueda107	no hits found
492	UniRef100_Q9NAX9	1	Heat shock 70 protein	Parastrongyloides trichosuri	Molecular chaperones HSP70/HSC70, HSP70 superfamily	O	sp|Q71U34|HSP7C_SAGOE	Heat shock cognate 71 kDa protein OS=Sagui...
493	UniRef100_Q67BD2	2	Heat shock protein 70-1	Nicotiana tabacum	Molecular chaperones HSP70/HSC70, HSP70 superfamily	O	sp|Q01233|HSP70_NEUCR	Heat shock 70 kDa protein OS=Neurospora cr...
494	UniRef100_B6JIX0	3	60 kDa chaperonin	Oligotropha carboxidovorans OM5	Chaperonin GroEL (HSP60 family)	O	sp|P60364|CH601_RHOPA	60 kDa chaperonin 1 OS=Rhodopseudomonas pa...
495	UniRef100_C7PFX3	1	TonB-dependent receptor plug	Chitinophaga pinensis DSM 2588	no hits found
496	UniRef100_B0DAU2	4	Histone H2B	Laccaria bicolor S238N-H82	Histone H2B	B	sp|P78567|H2B_AGABI	Histone H2B OS=Agaricus bisporus GN=htbA PE=...
497	UniRef100_B9GT56	2	Predicted protein	Populus trichocarpa
498	UniRef100_Q7RWP2	1	Beta-glucosidase 1	Neurospora crassa			sp|P48825|BGL1_ASPAC	Beta-glucosidase 1 OS=Aspergillus aculeatus...
499	UniRef100_Q3SA38	1	Putative glyceraldehyde 3-phosphate dehydrogenase (Fragment)	Fagus sylvatica	Glyceraldehyde 3-phosphate dehydrogenase	G	sp|P25856|G3PA_ARATH	Glyceraldehyde-3-phosphate dehydrogenase A,...
500	UniRef100_B7FMC9	6	Proteasome subunit alpha type	Medicago truncatula	20S proteasome, regulatory subunit alpha type PSMA6/SCL1	O	sp|O81146|PSA6A_ARATH	Proteasome subunit alpha type-6-A OS=Arabi...
501	UniRef100_A9H699	2	General secretion pathway protein D	Gluconacetobacter diazotrophicus PAl 5	Type II secretory pathway, component PulD	NU
502	UniRef100_C6T9U4	2	Putative uncharacterized protein	Glycine max	Predicted steroid reductase	R
503	UniRef100_Q8VXN6	1	Glyceraldehyde-3-phosphate dehydrogenase (Fragment)	Coleochaete scutata	Glyceraldehyde 3-phosphate dehydrogenase	G	sp|P12860|G3PB_SPIOL	Glyceraldehyde-3-phosphate dehydrogenase B,...
504	UniRef100_B0RR14	6	TonB-dependent outer membrane receptor	Xanthomonas campestris pv. campestris str. B100
505	UniRef100_B4LKF1	1	GJ21609	Drosophila virilis
506	UniRef100_Q2HPG3	1	Osmotin-like protein I	Gossypium hirsutum			sp|P50700|OSL3_ARATH	Osmotin-like protein OSM34 OS=Arabidopsis t...
507	UniRef100_A6RTG6	2	Putative uncharacterized protein	Botryotinia fuckeliana B05.10	Peroxisomal 3-ketoacyl-CoA-thiolase P-44/SCP2	I	sp|Q07598|NLTP_CHICK	Non-specific lipid-transfer protein (Fragme...
508	UniRef100_B7FKU7	1	Cysteine synthase	Medicago truncatula	Cystathionine beta-synthase and related enzymes	E	sp|Q43317|CYSK_CITLA	Cysteine synthase OS=Citrullus lanatus PE=2...
509	UniRef100_B8IP19	1	Septum site-determining protein MinC	Methylobacterium nodulans ORS 2060	Septum formation inhibitor	D	sp|Q89MI2|MINC_BRAJA	Probable septum site-determining protein mi...
510	UniRef100_A6S819	11	Citrate synthase	Botryotinia fuckeliana B05.10	Citrate synthase	C	sp|Q9TEM3|PRPC_EMENI	2-methylcitrate synthase, mitochondrial OS=...
511	UniRef100_C7YIL7	1	Putative uncharacterized protein	Nectria haematococca mpVI 77-13-4	no hits found
512	UniRef100_P17614	1	ATP synthase subunit beta, mitochondrial	Nicotiana plumbaginifolia	F0F1-type ATP synthase, beta subunit	C	sp|P17614|ATPBM_NICPL	ATP synthase subunit beta, mitochondrial O...
513	UniRef100_P83372	1	Citrate synthase, mitochondrial	Fragaria x ananassa	Citrate synthase	C	sp|P20115|CISY4_ARATH	Citrate synthase 4, mitochondrial OS=Arabi...
514	UniRef100_UPI00017961F5		PREDICTED: similar to guanylate binding protein 4	Equus caballus	Guanylate-binding protein	R	sp|Q5R9T9|GBP6_PONAB	Guanylate-binding protein 6 OS=Pongo abelii...
515	UniRef100_Q0PPW7	1	Elongation factor 1-alpha (Fragment)	Mycoblastus sanguinarius	Translation elongation factor EF-1 alpha/Tu	J	sp|Q09069|EF1A_SORMA	Elongation factor 1-alpha OS=Sordaria macro...
516	UniRef100_A6RKE1	1	Putative uncharacterized protein	Botryotinia fuckeliana B05.10	no hits found		sp|O59939|PELB_COLGL	Pectate lyase B OS=Colletotrichum gloeospor...
517	UniRef100_A1D3N7	2	Molecular chaperone Hsp70	Neosartorya fischeri NRRL 181	Molecular chaperones HSP70/HSC70, HSP70 superfamily	O	sp|Q01233|HSP70_NEUCR	Heat shock 70 kDa protein OS=Neurospora cr...
518	UniRef100_A5B109	24	Putative uncharacterized protein	Vitis vinifera			sp|Q8RU27|UPTG2_SOLTU	Alpha-1,4-glucan-protein synthase [UDP-for...
519	UniRef100_C7Z7S4	3	Predicted protein	Nectria haematococca mpVI 77-13-4	40S ribosomal protein S7	J	sp|O43105|RS7_NEUCR	40S ribosomal protein S7 OS=Neurospora crass...
520	UniRef100_A8B3L3	1	O-acetylhomoserine sulfhydrylase (Fragment)	Epichloe festucae	Cystathionine beta-lyases/cystathionine gamma-synthases	E	sp|O13326|CYSD_SCHPO	O-acetylhomoserine (thiol)-lyase OS=Schizos...
521	UniRef100_A6SEW8	4	Putative uncharacterized protein	Botryotinia fuckeliana B05.10	no hits found		sp|O54161|ABFB_STRCO	Alpha-L-arabinofuranosidase OS=Streptomyces...
522	UniRef100_B2ADM5	1	Predicted CDS Pa_4_1490	Podospora anserina	no hits found
523	UniRef100_A6SBH0	2	Putative uncharacterized protein	Botryotinia fuckeliana B05.10			sp|P48825|BGL1_ASPAC	Beta-glucosidase 1 OS=Aspergillus aculeatus...
524	UniRef100_C9SA50	1	Putative uncharacterized protein	Verticillium albo-atrum VaMs.102	no hits found
525	UniRef100_B2ARD9	2	Predicted CDS Pa_4_7820	Podospora anserina	no hits found
526	UniRef100_A3HTJ7	3	Xylose isomerase	Algoriphagus sp. PR1	Xylose isomerase	G	sp|Q4UNZ4|XYLA2_XANC8	Xylose isomerase 2 OS=Xanthomonas campestr...
527	UniRef100_Q9X4R9	1	OprF	Pseudomonas cichorii	Outer membrane protein and related peptidoglycan-associated (lipo)proteins	M	sp|P13794|PORF_PSEAE	Outer membrane porin F OS=Pseudomonas aerug...
528	UniRef100_Q1P9U3	1	ATP synthase subunit 9, mitochondrial	Camellia sinensis	no hits found
529	UniRef100_A4RGY5	10	Vacuolar ATP synthase catalytic subunit A	Magnaporthe grisea	Vacuolar H+-ATPase V1 sector, subunit A	C	sp|P31406|VATA_SCHPO	V-type proton ATPase catalytic subunit A OS...
530	UniRef100_A9PFJ3	4	Predicted protein	Populus trichocarpa			sp|Q57752|Y304_METJA	Uncharacterized protein MJ0304 OS=Methanoca...
531	UniRef100_B6TI56	2	Putative uncharacterized protein	Zea mays	Ribose 5-phosphate isomerase	G	sp|Q9ZU38|RPIA_ARATH	Probable ribose-5-phosphate isomerase OS=Ar...
532	UniRef100_Q2EKD7	1	Polyprotein	Papaya ringspot virus			sp|P89876|POLG_LMV0	Genome polyprotein OS=Lettuce mosaic virus (...
533	UniRef100_Q7X9C3	1	Aspartic protease (Fragment)	Pyrus pyrifolia	Aspartyl protease	O	sp|Q42456|ASPR1_ORYSJ	Aspartic proteinase oryzasin-1 OS=Oryza sa...
534	UniRef100_A6S494	2	Malate dehydrogenase	Botryotinia fuckeliana B05.10	NAD-dependent malate dehydrogenase	C	sp|P17505|MDHM_YEAST	Malate dehydrogenase, mitochondrial OS=Sacc...
535	UniRef100_B2VZE9	3	Enolase	Pyrenophora tritici-repentis Pt-1C-BFP	Enolase	G	sp|Q96X30|ENO_ASPFU	Enolase OS=Aspergillus fumigatus GN=enoA PE=...
536	UniRef100_B0T2C8	3	30S ribosomal protein S3	Caulobacter sp. K31	Ribosomal protein S3	J	sp|B8H4E0|RS3_CAUCN	30S ribosomal protein S3 OS=Caulobacter cres...
537	UniRef100_A1CTV7	27	ATP citrate lyase subunit (Acl), putatibe	Aspergillus clavatus	ATP-citrate lyase	C	sp|O13907|ACL2_SCHPO	Probable ATP-citrate synthase subunit 2 OS=...
538	2001242536	1	ABC-type multidrug transport system, ATPase and permease components [Soil: Diversa Silage]				sp|Q2LVL0|MSBA_SYNAS	Lipid A export ATP-binding/permease protein...
539	UniRef100_Q5LQF2	1	Acyl-CoA dehydrogenase famiy protein	Ruegeria pomeroyi	Acyl-CoA dehydrogenases	I	sp|Q5ZHT1|ACD11_CHICK	Acyl-CoA dehydrogenase family member 11 OS...
540	UniRef100_B1VLB7	9	Putative TerD-family protein	Streptomyces griseus subsp. griseus NBRC 13350	Uncharacterized proteins involved in stress response, homologs of TerZ and putative cAMP-binding protein CABP1	T	sp|P18782|TERE_ALCSP	Tellurium resistance protein terE OS=Alcali...
541	UniRef100_Q7XBP8	1	Ubiquitin/actin fusion protein 2	Bigelowiella natans	Actin and related proteins	Z	sp|O65315|ACT_COLSC	Actin OS=Coleochaete scutata PE=2 SV=1
542	UniRef100_UPI0001AEE432		streptogrisin A precursor	Streptomyces albus J1074	no hits found		sp|P00776|PRTA_STRGR	Streptogrisin-A OS=Streptomyces griseus GN=...
543	UniRef100_D0KXQ9	1	Polypeptide-transport-associated domain protein ShlB-type	Halothiobacillus neapolitanus c2	Hemolysin activation/secretion protein	U
544	UniRef100_Q0V7G4	1	Putative uncharacterized protein	Phaeosphaeria nodorum	Cyclophilin type peptidyl-prolyl cis-trans isomerase	O	sp|P10255|CYPH_NEUCR	Peptidyl-prolyl cis-trans isomerase, mitoch...
545	UniRef100_A8NZY9	1	Putative uncharacterized protein	Coprinopsis cinerea okayama7#130	no hits found
546	UniRef100_A0N0G9	21	Beta-tubulin	Blastocladiella emersonii	Beta tubulin	Z	sp|P11833|TBB_PARLI	Tubulin beta chain OS=Paracentrotus lividus
547	UniRef100_A1WCN6	2	Elongation factor Tu 2	Acidovorax sp. JS42	GTPases - translation elongation factors	J	sp|A1WCN6|EFTU2_ACISJ	Elongation factor Tu 2 OS=Acidovorax sp. (...
548	UniRef100_C5CPL5	1	Porin Gram-negative type	Variovorax paradoxus S110	no hits found		sp|P24305|OMP32_DELAC	Outer membrane porin protein 32 OS=Delftia...
549	UniRef100_A1CT51	22	GDP-mannose pyrophosphorylase A	Aspergillus clavatus	GDP-mannose pyrophosphorylase	GMO	sp|O60064|YBB2_SCHPO	Probable mannose-1-phosphate guanyltransfer...
550	UniRef100_Q095P1	1	Protein oar	Stigmatella aurantiaca DW4/3-1			sp|P38370|OAR_MYXXA	Protein oar OS=Myxococcus xanthus GN=oar PE=...
551	UniRef100_A9P8M1	3	Triosephosphate isomerase	Populus trichocarpa	Triosephosphate isomerase	G	sp|P48491|TPIS_ARATH	Triosephosphate isomerase, cytosolic OS=Ara...
552	UniRef100_Q9XF73	1	Putative chlorophyll a/b-binding protein	Phalaenopsis hybrid cultivar			sp|P07370|CB2B_SOLLC	Chlorophyll a-b binding protein 1B, chlorop...
553	UniRef100_B9T4X3	3	14 kDa proline-rich protein DC2.15, putative	Ricinus communis			sp|P14009|14KD_DAUCA	14 kDa proline-rich protein DC2.15 OS=Daucu...
554	UniRef100_C5ES53	1	Putative uncharacterized protein	Clostridiales bacterium 1_7_47FAA	ATPase components of ABC transporters with duplicated ATPase domains	R	sp|O31716|YKPA_BACSU	Uncharacterized ABC transporter ATP-binding...
555	UniRef100_B9HG21	1	Shikimate kinase	Populus trichocarpa			sp|Q9SJ05|AROK_ARATH	Shikimate kinase, chloroplastic OS=Arabidop...
556	UniRef100_C7SP30	1	ATP synthase subunit beta (Fragment)	Childia trianguliferum	F0F1-type ATP synthase, beta subunit	C	sp|P10719|ATPB_RAT	ATP synthase subunit beta, mitochondrial OS=R...
557	UniRef100_D1H5G3	2	Whole genome shotgun sequence of line PN40024, scaffold_4.assembly12x (Fragment)	Vitis vinifera
558	UniRef100_B1PZ38	1	OmpF	Pseudomonas putida	Outer membrane protein and related peptidoglycan-associated (lipo)proteins	M	sp|P13794|PORF_PSEAE	Outer membrane porin F OS=Pseudomonas aerug...
559	UniRef100_B8NVH8	1	Pectate lyase, putative	Aspergillus	no hits found		sp|P22864|PLYD_ASPNG	Pectin lyase D OS=Aspergillus niger GN=pelD...
560	UniRef100_A6QX99	18	Cell division control protein 10	Ajellomyces capsulatus NAm1	Septin CDC10 and related P-loop GTPases	DTZ	sp|P39827|CDC10_CANAL	Cell division control protein 10 OS=Candid...
561	UniRef100_A5C7J7	3	Putative uncharacterized protein	Vitis vinifera	Mitochondrial F1F0-ATP synthase, subunit delta/ATP16	C	sp|Q41000|ATP4_PEA	ATP synthase subunit delta', mitochondrial OS...
562	UniRef100_B8NV82	1	60S ribosomal protein L27a, putative	Aspergillus	60s ribosomal protein L15/L27	J	sp|P78987|RL27A_ERYGR	60S ribosomal protein L27a OS=Erysiphe gra...
563	UniRef100_Q8WJJ9	1	Ribulose bisphosphate carboxylase large chain (Fragment)	Tacca artocarpifolia			sp|P28259|RBL_DRYSU	Ribulose bisphosphate carboxylase large chai...
564	UniRef100_B7UXI3	2	Putative membrane or periplasmic protein	Pseudomonas aeruginosa	Uncharacterized protein conserved in bacteria	S
565	UniRef100_Q0CZT3	1	Putative uncharacterized protein	Aspergillus terreus NIH2624	no hits found		sp|A6X2G7|BETA_OCHA4	Choline dehydrogenase OS=Ochrobactrum anthr...
566	UniRef100_C7PSC4	1	Tail sheath protein	Chitinophaga pinensis DSM 2588	Phage tail sheath protein FI	R
567	UniRef100_A1CCI2	20	Catalase	Aspergillus clavatus	Catalase	P	sp|Q92405|CATB_ASPFU	Catalase B OS=Aspergillus fumigatus GN=catB...
568	UniRef100_Q6WE46	3	Actin	Amoeba proteus	Actin and related proteins	Z	sp|P30163|ACT2_ONCVO	Actin-2 OS=Onchocerca volvulus GN=act-2b PE...
569	UniRef100_A4RA79	6	Putative uncharacterized protein	Magnaporthe grisea	no hits found		sp|O59939|PELB_COLGL	Pectate lyase B OS=Colletotrichum gloeospor...
570	UniRef100_B2API8	3	Predicted CDS Pa_5_11620	Podospora anserina	no hits found
571	UniRef100_B6VJT7	9	Cytochrome b	Vitis vinifera	Cytochrome b	C	sp|P42792|CYB_ARATH	Cytochrome b OS=Arabidopsis thaliana GN=MT-C...
572	UniRef100_C9S9J0	1	Superoxide dismutase	Verticillium albo-atrum VaMs.102	Cu2+/Zn2+ superoxide dismutase SOD1	P	sp|Q8J0N2|SODC_CORMI	Superoxide dismutase [Cu-Zn] OS=Cordyceps m...
573	UniRef100_Q51781	2	Protein F (Fragment)	Pseudomonas fluorescens	Outer membrane protein and related peptidoglycan-associated (lipo)proteins	M	sp|P37726|PORF_PSEFL	Outer membrane porin F OS=Pseudomonas fluor...
574	UniRef100_B9S6M1	2	Serine carboxypeptidase, putative	Ricinus communis	Serine carboxypeptidases (lysosomal cathepsin A)	OE	sp|P52712|CBPX_ORYSJ	Serine carboxypeptidase-like OS=Oryza sativ...
575	UniRef100_C2FSR2	1	Elongation factor Tu	Sphingobacterium spiritivorum	GTPases - translation elongation factors	J	sp|Q11Q98|EFTU_CYTH3	Elongation factor Tu OS=Cytophaga hutchinso...
576	UniRef100_P46256	1	Fructose-bisphosphate aldolase, cytoplasmic isozyme 1	Pisum sativum	Fructose-biphosphate aldolase	G	sp|P46256|ALF1_PEA	Fructose-bisphosphate aldolase, cytoplasmic i...
577	UniRef100_B8LTH7	1	Choline dehydrogenase, putative	Talaromyces stipitatus ATCC 10500	Glucose dehydrogenase/choline dehydrogenase/mandelonitrile lyase (GMC oxidoreductase family)	R	sp|Q00922|ALOX_CANBO	Alcohol oxidase OS=Candida boidinii GN=AOD1...
578	UniRef100_Q11DD7	1	ATP synthase subunit alpha	Chelativorans sp. BNC1	F0F1-type ATP synthase, alpha subunit	C	sp|A9M839|ATPA_BRUC2	ATP synthase subunit alpha OS=Brucella cani...
579	UniRef100_UPI00016A54F0		porin, Gram-negative type	Burkholderia ubonensis Bu	Outer membrane protein (porin)	M	sp|Q04064|OMP_BORPE	Outer membrane porin protein BP0840 OS=Borde...
580	UniRef100_A8NEG5	1	ATP synthase subunit beta	Coprinopsis cinerea okayama7#130	F0F1-type ATP synthase, beta subunit	C	sp|P00830|ATPB_YEAST	ATP synthase subunit beta, mitochondrial OS...
581	UniRef100_A6EF87	4	Putative uncharacterized protein	Pedobacter sp. BAL39	no hits found
582	UniRef100_A4W8W9	3	OmpA domain protein transmembrane region-containing protein	Enterobacter sp. 638	Outer membrane protein and related peptidoglycan-associated (lipo)proteins	M	sp|P09146|OMPA_ENTAE	Outer membrane protein A OS=Enterobacter ae...
583	UniRef100_Q9URR2	2	Allergen Pen n 13	Penicillium chrysogenum	Subtilisin-related protease/Vacuolar protease B	O	sp|C5G1D1|SUB5_NANOT	Subtilisin-like protease 5 OS=Nannizzia ota...
584	UniRef100_B6GVW4	1	Pc06g00180 protein	Penicillium chrysogenum Wisconsin 54-1255	Aldehyde dehydrogenase	C	sp|P42041|ALDH_ALTAL	Aldehyde dehydrogenase OS=Alternaria altern...
585	UniRef100_A5B8Y6	6	Putative uncharacterized protein	Vitis vinifera	Alpha-amylase	G	sp|P27933|AMY3D_ORYSJ	Alpha-amylase isozyme 3D OS=Oryza sativa s...
586	UniRef100_A4AFD1	2	50S ribosomal protein L5	marine actinobacterium PHSC20C1	Ribosomal protein L5	J	sp|C5CC50|RL5_MICLC	50S ribosomal protein L5 OS=Micrococcus lute...
587	UniRef100_A8D311	1	Metalloendopeptidase	Trichoderma hamatum	no hits found		sp|P47189|PLNC_PENCI	Penicillolysin OS=Penicillium citrinum GN=p...
588	UniRef100_D0T5G4	1	Predicted protein	Acinetobacter radioresistens	no hits found
589	UniRef100_A9IUF9	3	Outer membrane porin protein	Bordetella petrii DSM 12804	Outer membrane protein (porin)	M	sp|Q04064|OMP_BORPE	Outer membrane porin protein BP0840 OS=Borde...
590	UniRef100_A5C536	8	Putative uncharacterized protein	Vitis vinifera	Multicopper oxidases	Q	sp|Q9FHN6|SKS2_ARATH	Monocopper oxidase-like protein SKS2 OS=Ara...
591	UniRef100_A7BDD8	20	Putative uncharacterized protein	Actinomyces odontolyticus ATCC 17982	Ribosomal protein S2	J	sp|B1VYT7|RS2_STRGG	30S ribosomal protein S2 OS=Streptomyces gri...
592	UniRef100_A8NYS1	6	DNA damage checkpoint protein rad24	Coprinopsis cinerea okayama7#130	Multifunctional chaperone (14-3-3 family)	O	sp|P29311|BMH1_YEAST	Protein BMH1 OS=Saccharomyces cerevisiae GN...
593	UniRef100_B0XT32	2	Pectate lyase A	Aspergillus fumigatus A1163	no hits found		sp|O59939|PELB_COLGL	Pectate lyase B OS=Colletotrichum gloeospor...
594	UniRef100_A1CRA3	3	40S ribosomal protein S3, putative	Aspergillus clavatus	40S ribosomal protein S3	J	sp|O60128|RS3_SCHPO	40S ribosomal protein S3 OS=Schizosaccharomy...
595	UniRef100_C9SW44	1	Pectate lyase C	Verticillium albo-atrum VaMs.102	no hits found		sp|Q9X6Z2|PELA_PAEBA	Pectate lyase A OS=Paenibacillus barcinonen...
596	UniRef100_Q7UH35	1	Predicted cation efflux system (AcrB/AcrD/AcrF family)	Rhodopirellula baltica	Cation/multidrug efflux pump	V	sp|P94177|CZCA_ALCSC	Cation efflux system protein czcA OS=Alcali...
597	UniRef100_P12693	1	Aldehyde dehydrogenase	Pseudomonas aeruginosa group	NAD-dependent aldehyde dehydrogenases	C	sp|P12693|ALDH_PSEOL	Aldehyde dehydrogenase OS=Pseudomonas oleov...
598	UniRef100_D0WLG9	1	Putative extracellular nuclease	Actinomyces sp. oral taxon 848 str. F0332	Predicted extracellular nuclease	R
599	UniRef100_C1XX29	4	Ribulose-1,5-bisphosphate carboxylase/oxygenase large subunit	Meiothermus silvanus DSM 9946	Ribulose 1,5-bisphosphate carboxylase, large subunit	G	sp|C5CPR2|RBL_VARPS	Ribulose bisphosphate carboxylase large chai...
600	UniRef100_A3KCF4	34	Glucose-1-phosphate adenylyltransferase	Ipomoea batatas	GDP-mannose pyrophosphorylase/mannose-1-phosphate guanylyltransferase	M	sp|Q9M462|GLGS_BRANA	Glucose-1-phosphate adenylyltransferase sma...
601	UniRef100_A4YK56	7	Putative Glucose/sorbosone dehydrogenase	Bradyrhizobium sp. ORS278	Glucose/sorbosone dehydrogenases	G	sp|O51055|Y024_BORBU	Uncharacterized protein BB_0024 OS=Borrelia...
602	UniRef100_Q6WNY9	1	Beta-tubulin (Fragment)	Hexamita inflata	Beta tubulin	Z	sp|P30883|TBB4_XENLA	Tubulin beta-4 chain OS=Xenopus laevis GN=t...
603	UniRef100_A5B9P8	4	Putative uncharacterized protein	Vitis vinifera	Peptidyl-prolyl cis-trans isomerase	O	sp|Q41651|CYPB_VICFA	Peptidyl-prolyl cis-trans isomerase, chloro...
604	UniRef100_Q5NDC0	1	Serine proteinase	Penicillium chrysogenum	Subtilisin-related protease/Vacuolar protease B	O	sp|C5FPS1|SUB1_NANOT	Subtilisin-like protease 1 OS=Nannizzia ota...
605	UniRef100_Q0V2B5	1	Putative uncharacterized protein	Phaeosphaeria nodorum	no hits found		sp|P52320|PRTC_STRGR	Streptogrisin-C OS=Streptomyces griseus GN=...
606	UniRef100_Q5B3S7	1	RS9_PODAN 40S ribosomal protein S9 (S7)	Emericella nidulans	Ribosomal protein S4	J	sp|O59675|RS9B_SCHPO	40S ribosomal protein S9-B OS=Schizosacchar...
607	UniRef100_A8DPS4	1	Alcohol oxidase	Gloeophyllum trabeum	Glucose dehydrogenase/choline dehydrogenase/mandelonitrile lyase (GMC oxidoreductase family)	R	sp|Q00922|ALOX_CANBO	Alcohol oxidase OS=Candida boidinii GN=AOD1...
608	UniRef100_A2DNL6	1	Putative uncharacterized protein	Trichomonas vaginalis G3	no hits found
609	UniRef100_B9DGH8	6	AT3G60750 protein (Fragment)	Arabidopsis thaliana	Transketolase	G	sp|Q43848|TKTC_SOLTU	Transketolase, chloroplastic OS=Solanum tub...
610	UniRef100_A4RHW7	11	Putative uncharacterized protein	Magnaporthe grisea	Ras-related small GTPase, Rho type	R	sp|Q9C3Y4|RHOA_EMENI	GTP-binding protein rhoA OS=Emericella nidu...
611	UniRef100_Q0UVK1	1	Putative uncharacterized protein	Phaeosphaeria nodorum	F0F1-type ATP synthase, alpha subunit	C	sp|P19483|ATPA_BOVIN	ATP synthase subunit alpha, mitochondrial O...
612	UniRef100_P13794	1	Outer membrane porin F	Pseudomonas			sp|P13647|K2C5_HUMAN	Keratin, type II cytoskeletal 5 OS=Homo sap...
613	UniRef100_A5B4I8	2	Putative uncharacterized protein	Vitis vinifera	Aldehyde dehydrogenase	C	sp|Q40255|ALDH_LINUS	Probable aldehyde dehydrogenase OS=Linum us...
614	UniRef100_A8N5X6	1	Putative uncharacterized protein	Coprinopsis cinerea okayama7#130	Ribosomal protein S7	J	sp|Q7RVI1|RS5_NEUCR	40S ribosomal protein S5 OS=Neurospora crass...
615	UniRef100_D0SB02	1	Outer membrane protein A	Acinetobacter johnsonii SH046	Outer membrane protein and related peptidoglycan-associated (lipo)proteins	M	sp|Q6RYW5|OMP38_ACIBA	Outer membrane protein omp38 OS=Acinetobac...
616	UniRef100_A5V4K4	1	OmpA/MotB domain protein	Sphingomonas wittichii RW1	no hits found		sp|P84838|OMPC_GLUDA	Outer membrane protein OS=Gluconacetobacter...
617	UniRef100_A5VBP4	1	Short-chain dehydrogenase/reductase SDR	Sphingomonas wittichii RW1	Dehydrogenases with different specificities (related to short-chain alcohol dehydrogenases)	IQR	sp|Q9KQH7|FABG_VIBCH	3-oxoacyl-[acyl-carrier-protein] reductase
618	UniRef100_Q5QJB4	1	Harpin binding protein 1	Solanum lycopersicum			sp|Q9LW57|PAP6_ARATH	Probable plastid-lipid-associated protein
619	UniRef100_B9SYN6	3	Nutrient reservoir, putative	Ricinus communis
620	UniRef100_B8N3P1	1	Aspartic endopeptidase Pep2	Aspergillus	Aspartyl protease	O	sp|P10977|CARPV_CANAL	Vacuolar aspartic protease OS=Candida albi...
621	UniRef100_A1DCR4	7	Malate dehydrogenase	Neosartorya fischeri NRRL 181	NAD-dependent malate dehydrogenase	C	sp|P17505|MDHM_YEAST	Malate dehydrogenase, mitochondrial OS=Sacc...
622	UniRef100_B5H4T6	1	Putative uncharacterized protein	Streptomyces pristinaespiralis ATCC 25486	no hits found
623	UniRef100_B2W4A9	2	14-3-3 protein epsilon	Pyrenophora tritici-repentis Pt-1C-BFP	Multifunctional chaperone (14-3-3 family)	O	sp|Q99002|1433_TRIHA	14-3-3 protein homolog OS=Trichoderma harzi...
624	UniRef100_A9QVW1	4	Lipase	Gossypium hirsutum			sp|Q9M8Y5|LTL1_ARATH	GDSL esterase/lipase LTL1 OS=Arabidopsis th...
625	UniRef100_Q2GQV4	2	Putative uncharacterized protein	Chaetomium globosum	no hits found
626	UniRef100_P53476	1	Actin	Toxoplasma gondii	Actin and related proteins	Z	sp|P10988|ACT1_PLAFO	Actin-1 OS=Plasmodium falciparum (isolate N...
627	UniRef100_A1CR77	30	MAP kinase kinase (Mkk2), putative	Aspergillus clavatus	Mitogen-activated protein kinase kinase (MAP2K)	T	sp|P32490|MKK1_YEAST	MAP kinase kinase MKK1/SSP32 OS=Saccharomyc...
628	UniRef100_B9T487	1	DUF26 domain-containing protein 1, putative	Ricinus communis			sp|Q9LV60|CRR55_ARATH	Cysteine-rich repeat secretory protein
629	UniRef100_B5BQV5	1	Cathepsin B-like cysteine protease (Fragment)	Raphanus sativus	Cysteine proteinase Cathepsin L	O	sp|Q5R6D1|CATB_PONAB	Cathepsin B OS=Pongo abelii GN=CTSB PE=2 SV=1
630	UniRef100_B2VV71	2	Cip2	Pyrenophora tritici-repentis Pt-1C-BFP	no hits found
631	UniRef100_C6T9E5	1	Putative uncharacterized protein	Glycine max	Mitochondrial ADP/ATP carrier proteins	C	sp|O22342|ADT1_GOSHI	ADP,ATP carrier protein 1, mitochondrial OS...
632	UniRef100_A1Z1Z6	1	Catalase	Prunus avium	Catalase	P	sp|P17598|CATA1_GOSHI	Catalase isozyme 1 OS=Gossypium hirsutum G...
633	UniRef100_A6V123	2	30S ribosomal protein S16	Pseudomonas aeruginosa	Ribosomal protein S16	J	sp|Q9HXP9|RS16_PSEAE	30S ribosomal protein S16 OS=Pseudomonas ae...
634	UniRef100_A1B011	11	50S ribosomal protein L11	Paracoccus denitrificans PD1222	Ribosomal protein L11	J	sp|Q28UY2|RL11_JANSC	50S ribosomal protein L11 OS=Jannaschia sp....
635	UniRef100_Q3A4E4	2	Pectate lyase	Pelobacter carbinolicus DSM 2380			sp|Q5SZK8|FREM2_HUMAN	FRAS1-related extracellular matrix protein...
636	UniRef100_C7YWL1	1	Predicted protein	Nectria haematococca mpVI 77-13-4	Cystathionine beta-lyases/cystathionine gamma-synthases	E	sp|O13326|CYSD_SCHPO	O-acetylhomoserine (thiol)-lyase OS=Schizos...
637	UniRef100_C7YJ69	1	Predicted protein	Nectria haematococca mpVI 77-13-4	Fumarate reductase, flavoprotein subunit	C	sp|O13755|FRDS_SCHPO	Putative fumarate reductase OS=Schizosaccha...
638	UniRef100_B2AWQ6	13	Predicted CDS Pa_7_7970	Podospora anserina	G-protein alpha subunit (small G protein superfamily)	DT	sp|O74259|GPA1_SPOSC	Guanine nucleotide-binding protein subunit
[truncated: 244 more rows]
