# Supplementary material for: Effects of stoichiometry and temperature perturbations on beech leaf litter decomposition, enzyme activities and protein expression
Source: Copernicus journal article supplement (doi:10.5194/bg-9-4537-2012), 2012-11-16
Supplement: Supplementary file 1 [file Supporting Information.pdf › Supplementary/Supporting Information.pdf]

## **Supporting Information**

The complete MASCOT search data set is provided on the PRIDE database website (<http://www.ebi.ac.uk/pride/>; the accession number is 19501).

Reviewer account:

- Username: review38293

- Password: J%\_4M4Md

<http://tinyurl.com/6kczrem>

## **Supplementary Material**

Supplementary Table1.xls

Supplementary Table2.xls
