# Supplementary material for: Effects of stoichiometry and temperature perturbations on beech leaf litter decomposition, enzyme activities and protein expression
Source: Copernicus journal article supplement (doi:10.5194/bg-9-4537-2012), 2012-11-16
Supplement: Supplementary file 3 [file Supplementary Table S2.xls]

## Sheet: Sheet1
Supplementary Table S2. List of extracellular enzymes involved in the breakdown of high molecular weight substrates.
For functional annotation, proteins were blasted against Swissprot (http://web.expasy.org/groups/swissprot/)
Grey shaded columns show NSAFs in control samples. Red shaded columns show NSAFs in heat treated samples. Blue shaded columns show NSAFs in frost treated samples.
Enzymes of fungal origin
								1st sampling									2nd Sampling
				Phylogenetic origin		Swissprot annotation		Control			Heat treatment			Frost treatment			Control			Heat treatment			Frost treatment
#	Leading accession number	Proteins in cluster	Protein name	Representative source organism	Phylum	Accession number	Protein annotation	Klausenleopoldsdorf	Ossiach	Schottenwald	Klausenleopoldsdorf	Ossiach	Schottenwald	Klausenloepoldsdorf	Ossiach	Schottenwald	Klausenleopoldsdorf	Ossiach	Schottenwald	Klausenleopoldsdorf	Ossiach	Schottenwald	Klausenloepoldsdorf	Ossiach	Schottenwald
170	UniRef100_A1D5E3	4	Pectate lyase, putative	Neosartorya fischeri NRRL 181	Ascomycota	sp|Q9X6Z2|PELA_PAEBA	Pectate lyase A OS=Paenibacillus barcinonen...	0.00187625	0	0.00176444	0	0	0	0	0	0	0.0061874	0.00224394	0.00664945	0.00405041	0.00165566	0.00434127	0.00515532	0.00188831	0.00409022
215	UniRef100_Q0CCF8	1	Putative uncharacterized protein	Aspergillus terreus NIH2624	Ascomycota	sp|Q9X6Z2|PELA_PAEBA	Pectate lyase A OS=Paenibacillus barcinonen...	0	0	0.00202081	0	0	0.00203331	0	0	0	0.00354321	0.00256998	0.0076156	0.00463893	0	0.0033147	0.00590438	0.00216268	0.00624603
634	UniRef100_C9SW44	1	Pectate lyase C	Verticillium albo-atrum VaMs.102	Ascomycota	sp|Q9X6Z2|PELA_PAEBA	Pectate lyase A OS=Paenibacillus barcinonen...	0	0	0	0	0	0	0	0	0	0	0	0.00192031	0	0	0.00167164	0	0	0.00157497
450	UniRef100_A2I7W3	1	Pectate lyase (Fragment)	Penicillium citrinum	Ascomycota	sp|O59939|PELB_COLGL	Pectate lyase B OS=Colletotrichum gloeospor...	0	0	0	0	0	0	0	0	0	0	0	0.00153625	0	0	0	0	0	0
452	UniRef100_B6HRM9	1	Pc22g24890 protein	Penicillium chrysogenum Wisconsin 54-1255	Ascomycota	sp|O59939|PELB_COLGL	Pectate lyase B OS=Colletotrichum gloeospor...	0	0	0.00145947	0	0	0	0	0	0.00108578	0	0	0.00275008	0	0	0.00239395	0	0	0.00225551
551	UniRef100_A6RKE1	1	Putative uncharacterized protein	Botryotinia fuckeliana B05.10	Ascomycota	sp|O59939|PELB_COLGL	Pectate lyase B OS=Colletotrichum gloeospor...	0	0	0	0	0	0	0	0	0	0	0	0	0	0	0	0.00104987	0	0.00111062
606	UniRef100_A4RA79	6	Putative uncharacterized protein	Magnaporthe grisea	Ascomycota	sp|O59939|PELB_COLGL	Pectate lyase B OS=Colletotrichum gloeospor...	0	0	0	0	0	0	0	0	0	0	0	0.00259019	0	0	0.00112738	0	0	0.00106219
632	UniRef100_B0XT32	2	Pectate lyase A	Aspergillus fumigatus A1163	Ascomycota	sp|O59939|PELB_COLGL	Pectate lyase B OS=Colletotrichum gloeospor...	0	0	0	0	0	0	0	0	0	0	0	0.00138789	0	0	0	0	0	0
844	UniRef100_C9SU67	1	Pectin lyase	Verticillium albo-atrum VaMs.102	Ascomycota	sp|Q00374|PLYA_COLGL	Pectin lyase OS=Colletotrichum gloeosporioi...	0	0	0	0	0	0	0	0	0	0	0	0.00114823	0	0	0	0	0	0
595	UniRef100_B8NVH8	1	Pectate lyase, putative	Aspergillus	Ascomycota	sp|P22864|PLYD_ASPNG	Pectin lyase D OS=Aspergillus niger GN=pelD...	0	0	0	0	0	0	0	0	0	0	0	0.00235099	0	0	0	0	0	0
257	UniRef100_B6H0D9	2	Pc12g06430 protein	Penicillium chrysogenum Wisconsin 54-1255	Ascomycota	sp|P0C1B3|AMYA1_ASPOR	Alpha-amylase A type-1/2 OS=Aspergillus or...	0	0	0.00101041	0	0.00116396	0	0	0	0	0.000885802	0	0.00095195	0.00231946	0.000948113	0	0.000738047	0	0.00156151
268	UniRef100_Q2GUM4	1	Putative uncharacterized protein	Chaetomium globosum	Ascomycota	sp|Q7SA23|GUX1A_NEUCR	Exoglucanase 1 OS=Neurospora crassa GN=cbh...	0	0	0	0	0	0	0	0	0	0.00184247	0.00267278	0	0.00241224	0.00197208	0.00258547	0.000767569	0.00224918	0.00243595
234	UniRef100_B6HC69	1	Pc18g05490 protein	Penicillium chrysogenum Wisconsin 54-1255	Ascomycota	sp|O59843|GUX1_ASPAC	Exoglucanase 1 OS=Aspergillus aculeatus GN=...	0	0	0.00207855	0	0	0.0010457	0	0	0.00154634	0.000911111	0	0.00293745	0.00159049	0.00292561	0.00255706	0.000759135	0.00111223	0.00160612
383	UniRef100_A4QYX6	1	Putative uncharacterized protein	Magnaporthe grisea	Ascomycota	sp|P62695|GUX1_TRIKO	Exoglucanase 1 OS=Trichoderma koningii GN=c...	0	0	0	0	0	0	0	0	0	0.000925347	0	0.0019889	0.00080767	0	0.00173134	0.00154199	0	0
328	UniRef100_B2AMK1	7	Predicted CDS Pa_5_7040	Podospora anserina	Ascomycota	sp|P56588|XYNA_PENSI	Endo-1,4-beta-xylanase OS=Penicillium simpl...	0	0	0.00238823	0	0	0	0	0	0	0.00104686	0	0.00450013	0	0	0.00195869	0	0	0.00369083
752	UniRef100_B0FXM0	12	Endo-1,4-beta-xylanase	Hypocrea pseudokoningii	Ascomycota	sp|P48793|XYN_TRIHA	Endo-1,4-beta-xylanase OS=Trichoderma harzia...	0	0	0	0	0	0.00212409	0	0	0.0015705	0	0	0	0	0	0	0	0	0
766	UniRef100_C8VPM8	2	Endo-1,4-beta-xylanase C	Aspergillus nidulans FGSC A4	Ascomycota	sp|Q00177|XYNC_EMENI	Endo-1,4-beta-xylanase C OS=Emericella nidu...	0	0	0	0	0	0	0	0	0	0	0	0	0	0	0	0.00105629	0.0015476	0
437	UniRef100_Q5XQ46	1	Family 10 xylanase	Cryptovalsa sp. BCC 7197	Ascomycota	sp|P23360|XYNA_THEAU	Endo-1,4-beta-xylanase OS=Thermoascus auran...	0	0	0	0	0	0	0	0	0	0	0.00185039	0	0.00222668	0	0.00238659	0.00106279	0.00155713	0
377	UniRef100_Q68KY2	1	Beta-glucosidase	Phaeosphaeria avenaria f. sp. triticae	Ascomycota	sp|P48825|BGL1_ASPAC	Beta-glucosidase 1 OS=Aspergillus aculeatus...	0	0	0.000541041	0	0	0	0	0	0	0.00047432	0	0.00101948	0	0	0	0	0	0.000418069
532	UniRef100_Q7RWP2	1	Beta-glucosidase 1	Neurospora crassa	Ascomycota	sp|P48825|BGL1_ASPAC	Beta-glucosidase 1 OS=Aspergillus aculeatus...	0	0	0	0.000499504	0	0	0	0	0	0	0	0	0	0	0	0	0	0
558	UniRef100_A6SBH0	2	Putative uncharacterized protein	Botryotinia fuckeliana B05.10	Ascomycota	sp|P48825|BGL1_ASPAC	Beta-glucosidase 1 OS=Aspergillus aculeatus...	0	0	0	0.000490534	0	0	0	0.000622302	0	0	0	0	0	0	0	0	0	0
751	UniRef100_B2WBD2	6	Arabinofuranosidase/B-xylosidase	Pyrenophora tritici-repentis Pt-1C-BFP	Ascomycota	sp|P48792|XYL1_TRIKO	Arabinofuranosidase/B-xylosidase OS=Trichod...	0	0	0	0	0	0	0	0	0	0	0	0	0	0	0.000760432	0.000677267	0	0
556	UniRef100_A6SEW8	4	Putative uncharacterized protein	Botryotinia fuckeliana B05.10	Ascomycota	sp|O54161|ABFB_STRCO	Alpha-L-arabinofuranosidase OS=Streptomyces...	0	0	0	0	0	0	0	0	0	0	0	0	0	0	0	0	0.00131788	0
382	UniRef100_A4UBZ2	5	Putative uncharacterized protein	Magnaporthe grisea	Ascomycota	sp|Q01738|CDH_PHACH	Cellobiose dehydrogenase OS=Phanerochaete ch...	0	0	0.000537963	0	0	0	0	0.000630798	0	0	0.00136832	0.000506841	0.000823291	0	0.000882413	0	0	0.000415691
478	UniRef100_B2AVK3	2	Predicted CDS Pa_7_2650	Podospora anserina	Ascomycota	sp|Q01738|CDH_PHACH	Cellobiose dehydrogenase OS=Phanerochaete ch...	0	0	0	0	0	0	0	0	0	0.000500067	0	0	0.000436473	0	0.000467817	0.000416654	0	0.000881526
332	UniRef100_B6HHG9	1	Pc21g00870 protein	Penicillium chrysogenum Wisconsin 54-1255	Ascomycota	sp|A7UI09|LAP1_TRIEQ	Aminopeptidase Y OS=Trichophyton equinum GN...	0	0	0	0	0	0	0	0	0	0	0	0	0	0	0.00157331	0	0	0.00148232
745	UniRef100_A1C444	2	Beta-N-acetylhexosaminidase NagA, putative	Aspergillus clavatus	Ascomycota	sp|P43077|HEX1_CANAL	Beta-hexosaminidase OS=Candida albicans GN=...	0	0	0	0	0	0	0	0	0	0	0	0	0	0	0	0	0	0.000606965
778	UniRef100_UPI000187E33E		hypothetical protein MPER_09405	Moniliophthora perniciosa FA553	Basidiomycota	sp|Q00177|XYNC_EMENI	Endo-1,4-beta-xylanase C OS=Emericella nidu...	0	0	0	0	0	0	0	0	0	0	0	0	0	0.00341321	0	0	0	0
931	UniRef100_Q7Z948	2	Xylanase	Volvariella volvacea	Basidiomycota	sp|P23360|XYNA_THEAU	Endo-1,4-beta-xylanase OS=Thermoascus auran...	0	0	0	0	0	0	0	0	0	0	0	0	0	0.00120904	0	0	0	0
942	UniRef100_O94753	4	Versatile peroxidase VPL2	Pleurotus eryngii	Basidiomycota	sp|P11542|LIG4_PHACH	Ligninase H2 OS=Phanerochaete chrysosporium...	0	0	0	0	0	0	0	0	0	0	0	0	0	0.00122913	0	0	0	0
							Sum of fungal derived NSAFs	0.00187625	0	0.0118009	0.000990039	0.00116396	0.00520311	0	0.0012531	0.00420262	0.0163166	0.0107054	0.0398537	0.0193056	0.0133528	0.0277521	0.0191293	0.011835	0.0294385
Enzymes of bacterial origin
								1st sampling									2nd Sampling
				Phylogenetic origin		Swissprot annotation		Control			Heat treatment			Frost treatment			Control			Heat treatment			Frost treatment
#	Leading accession number	Proteins in cluster	Protein name	Representative source organism	Phylum	Accession number	Protein annotation	Klausenleopoldsdorf	Ossiach	Schottenwald	Klausenleopoldsdorf	Ossiach	Schottenwald	Klausenloepoldsdorf	Ossiach	Schottenwald	Klausenleopoldsdorf	Ossiach	Schottenwald	Klausenleopoldsdorf	Ossiach	Schottenwald	Klausenloepoldsdorf	Ossiach	Schottenwald
561	UniRef100_A3HTJ7	3	Xylose isomerase	Algoriphagus sp. PR1	Bacteroidetes	sp|Q4UNZ4|XYLA2_XANC8	Xylose isomerase 2 OS=Xanthomonas campestr...	0	0	0	0	0	0	0	0	0	0.000933684	0	0	0.000814946	0	0.000873469	0.000777942	0	0.000822956
854	UniRef100_Q9F3Q2	1	Secreted extracellular small neutral protease	Streptomyces coelicolor	Actinobacteria	sp|P56406|SNPA_STRCS	Extracellular small neutral protease OS=Str...	0	0	0	0	0	0	0	0	0	0	0	0	0.00198811	0	0	0	0	0
858	UniRef100_UPI0001AED5D2		chitinase III	Streptomyces roseosporus NRRL 11379	Actinobacteria	sp|P11220|CHIT_STRPL	Chitinase 63 OS=Streptomyces plicatus GN=ch...	0	0	0	0	0	0	0	0	0	0	0	0	0	0	0	0	0	0.000617217
							Sum of bacterial derived NSAFs	0	0	0	0	0	0	0	0	0	0.000933684	0	0	0.00280306	0	0.000873469	0.000777942	0	0.00144017
								1st sampling									2nd Sampling
								Control			Heat treatment			Frost treatment			Control			Heat treatment			Frost treatment
								Klausenleopoldsdorf	Ossiach	Schottenwald	Klausenleopoldsdorf	Ossiach	Schottenwald	Klausenloepoldsdorf	Ossiach	Schottenwald	Klausenleopoldsdorf	Ossiach	Schottenwald	Klausenleopoldsdorf	Ossiach	Schottenwald	Klausenloepoldsdorf	Ossiach	Schottenwald
Sum of NSAFs form all phylogenetic groups								0.00187625	0	0.0118009	0.000990039	0.00116396	0.00520311	0	0.0012531	0.00420262	0.0172503	0.0107054	0.0398537	0.0221087	0.0133528	0.0286255	0.0199072	0.011835	0.0308787
